# Supplementary material for: Why we might be misusing process mass intensity (PMI) and a methodology to apply it effectively as a discovery level metric
Source: Royal Society of Chemistry journal article supplement (doi:10.1039/c9gc01537j), 2019-11-07
Supplement: c9gc01537j1.xlsx [file c9gc01537j1.xlsx]

## Sheet:  SOCl2
Literature data reported
	Reaction 1												A dry 2-L, three-necked, jacketed, round-bottomed flask equipped with a mechanical stirrer, nitrogen inlet adapter, and pressureequalizing addition funnel was charged with amine 3 (52.4 g, 0.117 mol, 1.0 equiv), imidazole (26.3 g, 3.3 equiv), and 590 mL of ethyl acetate, and the contents were cooled to 0 °C. To this reaction mixture was slowly added the DMF slurry of acyl chloride at such a rate …
	OPRD, 1999, 3 ,145-148
	METRICS
	Reactant (Limiting Reactant First)	Mass (g)	MW (g mol-1)	equiv	Mol	Catalyst	Mass (g)	Reagent	MW (g mol-1)	Mass (g)	Reaction Solvent	Volume (mL)	Density (g.mL-1)	Mass (g)	Work up Chemical	Mass (g)	Workup Solvent	Volume (mL)	Density (g mL-1)	Mass (g)
	Amine	52.4	446.59	1	0.117334			SOCl2	118.96	17.4475	THF	400	0.883	353.2						0
	Carboxylic Acid	25.8	200.24	1.1	0.128845			Imidazole	68.03	26.3413	DMF	180	0.945	170.1						0
											EtOAc	590	0.895	528.05						0
	Total	78.2	646.83		0.246179		0			43.7888		1170		1051.35		0				0
									Yield (%)	92.0975
									AE (%)	97.2141						mass (g)	MW	mol
									RME (%)	86.8926					Product	67.95	628.81	0.108061
									MI total (g g-1)	17.2677
									MI RRC (g g-1)	1.79527
									MI Solvents (g g-1)	15.4724		Conc (M)	0.100285
	Reaction 2												D-2-chloropropionic acid (600 g, 5.53 mol; 98.8% ee), was added SOCl2 (724 g, 6.08 mol) at 65 °C and heated further for 1 h at 85 °C. The reaction mixture was cooled to room temperature to give 745 g of the oily product. The mixture (722 g) was diluted with toluene (400 mL) to make a toluene solution of D-2- chloropropionyl chloride (5.36 mol). A mixture of L-glutamine (784 g, 5.36 mol), H2O (300…
	OPRD, 2000, 4, 147-152
	METRICS
	Reactant (Limiting Reactant First)	Mass (g)	MW (g mol-1)	equiv	Mol	Catalyst	Mass (g)	Reagent	MW (g mol-1)	Mass (g)	Reaction Solvent	Volume (mL)	Density (g.mL-1)	Mass (g)	Work up Chemical	Mass (g)	Workup Solvent	Volume (mL)	Density (g mL-1)	Mass (g)
	L-glutamine	784	146.15	1	5.36435			SOCl2	118.96	724	PhMe	550	0.867	476.85						0
	D-2-chloropropionic acid	600	108.52	1.03068	5.52893			NaOH	40	200	Water	1300	1	1300						0
	Total	1384	254.67		10.8933		0			924		1850		1776.85		0				0
									Yield (%)	81.7662
									AE (%)	92.9242						mass (g)	MW	mol
									RME (%)	75					Product	1038	236.65	4.38622
									MI total (g g-1)	3.93531
									MI RRC (g g-1)	2.22351
									MI Solvents (g g-1)	1.7118		Conc (M)	2.89965
Simulation A: [Acid] = 0.4 M, Literature data yield
	METRICS
	Reactant (Limiting Reactant First)	Mass (g)	MW (g mol-1)	equiv	Mol	Catalyst	Mass (g)	Reagent	MW (g mol-1)	Mass (g)	Reaction Solvent	Volume (mL)	Density (g.mL-1)	Mass (g)	Work up Chemical	Mass (g)	Workup Solvent	Volume (mL)	Density (g mL-1)	Mass (g)
Reaction 1	Amine	52.4	446.59	1	0.117334			SOCl2	118.96	17.4475	THF	101	0.883	89.183						0
	Carboxylic Acid	25.8	200.24	1.1	0.128845			Imidazole	68.03	26.3413	DMF	45	0.945	42.525						0
											EtOAc	148	0.895	132.46						0
	Total	78.2	646.83		0.246179		0			43.7888		294		264.168		0				0
									Yield (%)	92.0975
									AE (%)	97.2141						mass (g)	MW	mol
									RME (%)	86.8926					Product	67.95	628.81	0.108061
									MI total (g g-1)	5.68295
									MI RRC (g g-1)	1.79527
									MI Solvents (g g-1)	3.88768		Conc (M)	0.399094
	METRICS
	Reactant (Limiting Reactant First)	Mass (g)	MW (g mol-1)	equiv	Mol	Catalyst	Mass (g)	Reagent	MW (g mol-1)	Mass (g)	Reaction Solvent	Volume (mL)	Density (g.mL-1)	Mass (g)	Work up Chemical	Mass (g)	Workup Solvent	Volume (mL)	Density (g mL-1)	Mass (g)
Reaction 2	L-glutamine	784	146.15	1	5.36435			SOCl2	118.96	657.288	PhMe	3982	0.867	3452.39						0
	D-2-chloropropionic acid	600	108.52	1.03	5.52528			NaOH	40	221.011	Water	9412	1	9412						0
	Total	1384	254.67		10.8896		0			878.299		13394		12864.4		0				0
									Yield (%)	81.7662
									AE (%)	92.9242						mass (g)	MW	mol
									RME (%)	75					Product	1038	236.65	4.38622
									MI total (g g-1)	14.5729
									MI RRC (g g-1)	2.17948
									MI Solvents (g g-1)	12.3934		Conc (M)	0.400504
Simulation B: [Acid] = Literature data, 90% Yield
	METRICS
	Reactant (Limiting Reactant First)	Mass (g)	MW (g mol-1)	equiv	Mol	Catalyst	Mass (g)	Reagent	MW (g mol-1)	Mass (g)	Reaction Solvent	Volume (mL)	Density (g.mL-1)	Mass (g)	Work up Chemical	Mass (g)	Workup Solvent	Volume (mL)	Density (g mL-1)	Mass (g)
Reaction 1	Amine	52.4	446.59	1	0.117334			SOCl2	118.96	17.4475	THF	400	0.883	353.2						0
	Carboxylic Acid	25.8	200.24	1.1	0.128845			Imidazole	68.03	26.3413	DMF	180	0.945	170.1						0
											EtOAc	590	0.895	528.05						0
	Total	78.2	646.83		0.246179		0			43.7888		1170		1051.35		0				0
									Yield (%)	90
									AE (%)	97.2141						mass (g)	MW	mol
									RME (%)	84.9136					Product	66.4025	628.81	0.1056
									MI total (g g-1)	17.6701
									MI RRC (g g-1)	1.83711
									MI Solvents (g g-1)	15.833		Conc (M)	0.100285
	METRICS
	Reactant (Limiting Reactant First)	Mass (g)	MW (g mol-1)	equiv	Mol	Catalyst	Mass (g)	Reagent	MW (g mol-1)	Mass (g)	Reaction Solvent	Volume (mL)	Density (g.mL-1)	Mass (g)	Work up Chemical	Mass (g)	Workup Solvent	Volume (mL)	Density (g mL-1)	Mass (g)
Reaction 2	L-glutamine	784	146.15	1	5.36435			SOCl2	118.96	657.288	PhMe	550	0.867	476.85						0
	D-2-chloropropionic acid	600	108.52	1.03	5.52528			NaOH	40	221.011	Water	1300	1	1300						0
	Total	1384	254.67		10.8896		0			878.299		1850		1776.85		0				0
									Yield (%)	90
									AE (%)	92.9242						mass (g)	MW	mol
									RME (%)	82.5525					Product	1142.53	236.65	4.82792
									MI total (g g-1)	3.53528
									MI RRC (g g-1)	1.98008
									MI Solvents (g g-1)	1.55519		Conc (M)	2.89965
Simulation C: [Acid] = 0.4 M, 90% Yield
	METRICS
	Reactant (Limiting Reactant First)	Mass (g)	MW (g mol-1)	equiv	Mol	Catalyst	Mass (g)	Reagent	MW (g mol-1)	Mass (g)	Reaction Solvent	Volume (mL)	Density (g.mL-1)	Mass (g)	Work up Chemical	Mass (g)	Workup Solvent	Volume (mL)	Density (g mL-1)	Mass (g)
Reaction 1	Amine	52.4	446.59	1	0.117334			SOCl2	118.96	17.4475	THF	101	0.883	89.183						0
	Carboxylic Acid	25.8	200.24	1.1	0.128845			Imidazole	68.03	26.3413	DMF	45	0.945	42.525						0
											EtOAc	148	0.895	132.46						0
	Total	78.2	646.83		0.246179		0			43.7888		294		264.168		0				0
									Yield (%)	90
									AE (%)	97.2141						mass (g)	MW	mol
									RME (%)	84.9136					Product	66.4025	628.81	0.1056
									MI total (g g-1)	5.8154
									MI RRC (g g-1)	1.83711
									MI Solvents (g g-1)	3.97829		Conc (M)	0.399094
	METRICS
	Reactant (Limiting Reactant First)	Mass (g)	MW (g mol-1)	equiv	Mol	Catalyst	Mass (g)	Reagent	MW (g mol-1)	Mass (g)	Reaction Solvent	Volume (mL)	Density (g.mL-1)	Mass (g)	Work up Chemical	Mass (g)	Workup Solvent	Volume (mL)	Density (g mL-1)	Mass (g)
Reaction 2	L-glutamine	784	146.15	1	5.36435			SOCl2	118.96	657.288	PhMe	3982	0.867	3452.39						0
	D-2-chloropropionic acid	600	108.52	1.03	5.52528			NaOH	40	221.011	Water	9412	1	9412						0
	Total	1384	254.67		10.8896		0			878.299		13394		12864.4		0				0
									Yield (%)	90
									AE (%)	92.9242						mass (g)	MW	mol
									RME (%)	82.5525					Product	1142.53	236.65	4.82792
									MI total (g g-1)	13.2397
									MI RRC (g g-1)	1.98008
									MI Solvents (g g-1)	11.2596		Conc (M)	0.400504
Simulation D: [Acid] = 0.4 M, 50% Yield
	METRICS
	Reactant (Limiting Reactant First)	Mass (g)	MW (g mol-1)	equiv	Mol	Catalyst	Mass (g)	Reagent	MW (g mol-1)	Mass (g)	Reaction Solvent	Volume (mL)	Density (g.mL-1)	Mass (g)	Work up Chemical	Mass (g)	Workup Solvent	Volume (mL)	Density (g mL-1)	Mass (g)
Reaction 1	Amine	52.4	446.59	1	0.117334			SOCl2	118.96	17.4475	THF	101	0.883	89.183						0
	Carboxylic Acid	25.8	200.24	1.1	0.128845			Imidazole	68.03	26.3413	DMF	45	0.945	42.525						0
											EtOAc	148	0.895	132.46						0
	Total	78.2	646.83		0.246179		0			43.7888		294		264.168		0				0
									Yield (%)	50
									AE (%)	97.2141						mass (g)	MW	mol
									RME (%)	47.1742					Product	36.8903	628.81	0.0586668
									MI total (g g-1)	10.4677
									MI RRC (g g-1)	3.3068
									MI Solvents (g g-1)	7.16091		Conc (M)	0.399094
	METRICS
	Reactant (Limiting Reactant First)	Mass (g)	MW (g mol-1)	equiv	Mol	Catalyst	Mass (g)	Reagent	MW (g mol-1)	Mass (g)	Reaction Solvent	Volume (mL)	Density (g.mL-1)	Mass (g)	Work up Chemical	Mass (g)	Workup Solvent	Volume (mL)	Density (g mL-1)	Mass (g)
Reaction 2	L-glutamine	784	146.15	1	5.36435			SOCl2	118.96	657.288	PhMe	3982	0.867	3452.39						0
	D-2-chloropropionic acid	600	108.52	1.03	5.52528			NaOH	40	221.011	Water	9412	1	9412						0
	Total	1384	254.67		10.8896		0			878.299		13394		12864.4		0				0
									Yield (%)	50
									AE (%)	92.9242						mass (g)	MW	mol
									RME (%)	45.8625					Product	634.737	236.65	2.68218
									MI total (g g-1)	23.8314
									MI RRC (g g-1)	3.56415
									MI Solvents (g g-1)	20.2673		Conc (M)	0.400504
SUMMARY
		Literature data and simulation A-D with SOCl2 as coupling reagent
		Entry	Substrate	AE	RME	PMI	PMIRRC	PMIsolv	Yield
				(%)	(%)	(g g-1)	(g g-1)	(g g-1)	(%)
		Literature data reported
			Reaction 1: 0.1 M	97.2141	86.8926	17.2677	1.79527	15.4724	92.0975
			Reaction 2: 2.9 M	92.9242	75	3.93531	2.22351	1.7118	81.7662
		Simulation A: [Acid] = 0.4 M, Literature data yield
			Reaction 1	97.2141	86.8926	5.68295	1.79527	3.88768	92.0975
			Reaction 2	92.9242	75	14.5729	2.17948	12.3934	81.7662
		Simulation B: [Acid] = Literature data, 90% Yield
			Reaction 1	97.2141	84.9136	17.6701	1.83711	15.833	90
			Reaction 2	92.9242	82.5525	3.53528	1.98008	1.55519	90
		Simulation C: [Acid] = 0.4 M, 90% Yield
			Reaction 1	97.2141	84.9136	5.8154	1.83711	3.97829	90
			Reaction 2	92.9242	82.5525	13.2397	1.98008	11.2596	90
		Simulation D: [Acid] = 0.4 M, 50% Yield
			Reaction 1	97.2141	47.1742	10.4677	3.3068	7.16091	50
			Reaction 2	92.9242	45.8625	23.8314	3.56415	20.2673	50

## Sheet: (COCl)2
Literature data reported
		Reaction 3										To a 72-L unjacketed reactor equipped with a temperature probe, reflux condenser, nitrogen sweep, cooling bath, and an overhead stirrer was charged N-Boc-3-benzylnipecotic acid 1 (3 kg, 9.4 3mol) followed by dichloromethane (30 L). The solution was cooled to -15 to -10 °C, and oxalyl chloride (1.3 L, 15.2 mol) was added over 15 min while the internal temperature was maintained below -10 °C. DMF (…
		OPRD, 2004, 8, 360-362
		METRICS
		Reactant (Limiting Reactant First)	Mass (g)	MW (g mol-1)	equiv	Mol	Catalyst	Mass (g)	Reagent	MW (g mol-1)	Mass (g)	Reaction Solvent	Volume (mL)	Density (g.mL-1)	Mass (g)	Work up Chemical	Mass (g)	Workup Solvent	Volume (mL)	Density (g mL-1)	Mass (g)
	Reaction 3	Carboxylic acid	3000	319.4	1	9.39261			(COCl)2	126.92	1929.18	DCM	30000	1.325	39750						0
		Trimethylhydrazine	1050	74.13	1.5	14.1643			DMF	73.09	283.5	1,4-Dioxane	14506.8	1.034	15000						0
									NEt3	101.19	3845.2				0						0
		Total	4050	393.53		23.5569		0			6057.88		44506.8		54750		0				0
										Yield (%)	90.7282
										AE (%)	95.4209						mass (g)	MW	mol
										RME (%)	79.0123					Product	3200	375.51	8.52174
										MI total (g g-1)	20.2681		Conc (M)	0.211038
										MI RRC (g g-1)	3.15871
										MI Solvents (g g-1)	17.1094
		Reaction 4										(R)-2-(4-(Cyclopropylsulfonyl)phenyl)-N-(pyrazin-2- yl)-3-(tetrahydro-2H-pyran-4-yl)propanamide ((R)-1). At 20−25 °C, a reactor was charged with THF (100 L) followed by chiral acid (R)-9 (23.10 kg, 55.59 mol) which was rinsed into the reactor with THF (5 L). DMF (0.275 kg, 3.76 mol) was charged to the reactor followed by the addition of oxalyl chloride (9.125 kg, 71.89 mol) over 0.25 h, maintaini…
		OPRD, 2012, 16, 830-835
		METRICS
		Reactant (Limiting Reactant First)	Mass (g)	MW (g mol-1)	equiv	Mol	Catalyst	Mass (g)	Reagent	MW (g mol-1)	Mass (g)	Reaction Solvent	Volume (mL)	Density (g.mL-1)	Mass (g)	Work up Chemical	Mass (g)	Workup Solvent	Volume (mL)	Density (g mL-1)	Mass (g)
	Reaction 4	Chiral acid	23100	338.42	1	68.2584			(COCl)2	126.92	9124.28	THF	251000	0.883	221633						0
		2-aminopyrazine	7150	95.11	1.10135	75.1761			DMF	73.09	274.818				0						0
									Pyridine	79.1	54001.6				0						0
		Total	30250	433.53		143.434		0			63400.7		251000		221633		0				0
										Yield (%)	74.0795
										AE (%)	96.0695						mass (g)	MW	mol
										RME (%)	69.6198					Product	21060	416.49	50.5654
										MI total (g g-1)	14.9707
										MI RRC (g g-1)	4.44685
										MI Solvents (g g-1)	10.5239		Conc (M)	0.271946
Simulation A: [Acid] = 0.4 M, Literature data yield
		METRICS
		Reactant (Limiting Reactant First)	Mass (g)	MW (g mol-1)	equiv	Mol	Catalyst	Mass (g)	Reagent	MW (g mol-1)	Mass (g)	Reaction Solvent	Volume (mL)	Density (g.mL-1)	Mass (g)	Work up Chemical	Mass (g)	Workup Solvent	Volume (mL)	Density (g mL-1)	Mass (g)
	Reaction 3	Carboxylic acid	3000	319.4	1	9.39261			(COCl)2	126.92	1929.18	DCM	15827.5	1.325	20971.4						0
		Trimethylhydrazine	1050	74.13	1.5	14.1643			DMF	73.09	283.5	1,4-Dioxane	7653.52	1.034	7913.74						0
									NEt3	101.19	3845.2				0						0
		Total	4050	393.53		23.5569		0			6057.88		23481		28885.2		0				0
										Yield (%)	90.7282
										AE (%)	95.4209						mass (g)	MW	mol
										RME (%)	79.0123					Product	3200	375.51	8.52174
										MI total (g g-1)	12.1853		Conc (M)	0.400009
										MI RRC (g g-1)	3.15871
										MI Solvents (g g-1)	9.02661
		METRICS
		Reactant (Limiting Reactant First)	Mass (g)	MW (g mol-1)	equiv	Mol	Catalyst	Mass (g)	Reagent	MW (g mol-1)	Mass (g)	Reaction Solvent	Volume (mL)	Density (g.mL-1)	Mass (g)	Work up Chemical	Mass (g)	Workup Solvent	Volume (mL)	Density (g mL-1)	Mass (g)
	Reaction 4	Chiral acid	23100	338.42	1	68.2584			(COCl)2	126.92	9124.28	THF	170646	0.883	150680						0
		2-aminopyrazine	7150	95.11	1.10135	75.1761			DMF	73.09	274.818				0						0
									Pyridine	79.1	54001.6				0						0
		Total	30250	433.53		143.434		0			63400.7		170646		150680		0				0
										Yield (%)	74.0795
										AE (%)	96.0695						mass (g)	MW	mol
										RME (%)	69.6198					Product	21060	416.49	50.5654
										MI total (g g-1)	11.6017
										MI RRC (g g-1)	4.44685
										MI Solvents (g g-1)	7.15482		Conc (M)	0.4
Simulation B: [Acid] = Literature data, 90% Yield
		METRICS
		Reactant (Limiting Reactant First)	Mass (g)	MW (g mol-1)	equiv	Mol	Catalyst	Mass (g)	Reagent	MW (g mol-1)	Mass (g)	Reaction Solvent	Volume (mL)	Density (g.mL-1)	Mass (g)	Work up Chemical	Mass (g)	Workup Solvent	Volume (mL)	Density (g mL-1)	Mass (g)
	Reaction 3	Carboxylic acid	3000	319.4	1	9.39261			(COCl)2	126.92	1929.18	DCM	30000	1.325	39750						0
		Trimethylhydrazine	1050	74.13	1.5	14.1643			DMF	73.09	283.5	1,4-Dioxane	14506.8	1.034	15000						0
									NEt3	101.19	3845.2				0						0
		Total	4050	393.53		23.5569		0			6057.88		44506.8		54750		0				0
										Yield (%)	90
										AE (%)	95.4209						mass (g)	MW	mol
										RME (%)	78.3782					Product	3174.32	375.51	8.45335
										MI total (g g-1)	20.4321		Conc (M)	0.211038
										MI RRC (g g-1)	3.18427
										MI Solvents (g g-1)	17.2478
		METRICS
		Reactant (Limiting Reactant First)	Mass (g)	MW (g mol-1)	equiv	Mol	Catalyst	Mass (g)	Reagent	MW (g mol-1)	Mass (g)	Reaction Solvent	Volume (mL)	Density (g.mL-1)	Mass (g)	Work up Chemical	Mass (g)	Workup Solvent	Volume (mL)	Density (g mL-1)	Mass (g)
	Reaction 4	Chiral acid	23100	338.42	1	68.2584			(COCl)2	126.92	9124.28	THF	251000	0.883	221633						0
		2-aminopyrazine	7150	95.11	1.10135	75.1761			DMF	73.09	274.818				0						0
									Pyridine	79.1	54001.6				0						0
		Total	30250	433.53		143.434		0			63400.7		251000		221633		0				0
										Yield (%)	90
										AE (%)	96.0695						mass (g)	MW	mol
										RME (%)	84.5819					Product	25586	416.49	61.4325
										MI total (g g-1)	12.3225
										MI RRC (g g-1)	3.66023
										MI Solvents (g g-1)	8.66226		Conc (M)	0.271946
Simulation C: [Acid] = 0.4 M, 90% Yield
		METRICS
		Reactant (Limiting Reactant First)	Mass (g)	MW (g mol-1)	equiv	Mol	Catalyst	Mass (g)	Reagent	MW (g mol-1)	Mass (g)	Reaction Solvent	Volume (mL)	Density (g.mL-1)	Mass (g)	Work up Chemical	Mass (g)	Workup Solvent	Volume (mL)	Density (g mL-1)	Mass (g)
	Reaction 3	Carboxylic acid	3000	319.4	1	9.39261			(COCl)2	126.92	1929.18	DCM	15827.5	1.325	20971.4						0
		Trimethylhydrazine	1050	74.13	1.5	14.1643			DMF	73.09	283.5	1,4-Dioxane	7653.52	1.034	7913.74						0
									NEt3	101.19	3845.2				0						0
		Total	4050	393.53		23.5569		0			6057.88		23481		28885.2		0				0
										Yield (%)	90
										AE (%)	95.4209						mass (g)	MW	mol
										RME (%)	78.3782					Product	3174.32	375.51	8.45335
										MI total (g g-1)	12.2839		Conc (M)	0.400009
										MI RRC (g g-1)	3.18427
										MI Solvents (g g-1)	9.09964
		METRICS
		Reactant (Limiting Reactant First)	Mass (g)	MW (g mol-1)	equiv	Mol	Catalyst	Mass (g)	Reagent	MW (g mol-1)	Mass (g)	Reaction Solvent	Volume (mL)	Density (g.mL-1)	Mass (g)	Work up Chemical	Mass (g)	Workup Solvent	Volume (mL)	Density (g mL-1)	Mass (g)
	Reaction 4	Chiral acid	23100	338.42	1	68.2584			(COCl)2	126.92	9124.28	THF	170646	0.883	150680						0
		2-aminopyrazine	7150	95.11	1.10135	75.1761			DMF	73.09	274.818				0						0
									Pyridine	79.1	54001.6				0						0
		Total	30250	433.53		143.434		0			63400.7		170646		150680		0				0
										Yield (%)	90
										AE (%)	96.0695						mass (g)	MW	mol
										RME (%)	84.5819					Product	25586	416.49	61.4325
										MI total (g g-1)	9.54939
										MI RRC (g g-1)	3.66023
										MI Solvents (g g-1)	5.88917		Conc (M)	0.4
Simulation D: [Acid] = 0.4 M, 50% Yield
		METRICS
		Reactant (Limiting Reactant First)	Mass (g)	MW (g mol-1)	equiv	Mol	Catalyst	Mass (g)	Reagent	MW (g mol-1)	Mass (g)	Reaction Solvent	Volume (mL)	Density (g.mL-1)	Mass (g)	Work up Chemical	Mass (g)	Workup Solvent	Volume (mL)	Density (g mL-1)	Mass (g)
	Reaction 3	Carboxylic acid	3000	319.4	1	9.39261			(COCl)2	126.92	1929.18	DCM	15827.5	1.325	20971.4						0
		Trimethylhydrazine	1050	74.13	1.5	14.1643			DMF	73.09	283.5	1,4-Dioxane	7653.52	1.034	7913.74						0
									NEt3	101.19	3845.2				0						0
		Total	4050	393.53		23.5569		0			6057.88		23481		28885.2		0				0
										Yield (%)	50
										AE (%)	95.4209						mass (g)	MW	mol
										RME (%)	43.5434					Product	1763.51	375.51	4.69631
										MI total (g g-1)	22.111		Conc (M)	0.400009
										MI RRC (g g-1)	5.73169
										MI Solvents (g g-1)	16.3794
		METRICS
		Reactant (Limiting Reactant First)	Mass (g)	MW (g mol-1)	equiv	Mol	Catalyst	Mass (g)	Reagent	MW (g mol-1)	Mass (g)	Reaction Solvent	Volume (mL)	Density (g.mL-1)	Mass (g)	Work up Chemical	Mass (g)	Workup Solvent	Volume (mL)	Density (g mL-1)	Mass (g)
	Reaction 4	Chiral acid	23100	338.42	1	68.2584			(COCl)2	126.92	9124.28	THF	170646	0.883	150680						0
		2-aminopyrazine	7150	95.11	1.10135	75.1761			DMF	73.09	274.818				0						0
									Pyridine	79.1	54001.6				0						0
		Total	30250	433.53		143.434		0			63400.7		170646		150680		0				0
										Yield (%)	50
										AE (%)	96.0695						mass (g)	MW	mol
										RME (%)	46.99					Product	14214.5	416.49	34.1292
										MI total (g g-1)	17.1889
										MI RRC (g g-1)	6.58841
										MI Solvents (g g-1)	10.6005		Conc (M)	0.4
SUMMARY
													Reaction 3	OPRD, 2004, 8, 360-362
			Literature data and simulation A-D with oxalyl chloride as coupling reagent
			Entry	Substrate	AE	RME	PMI	PMIRRC	PMIsolv	Yield
					(%)	(%)	(g g-1)	(g g-1)	(g g-1)	(%)
			Literature data reported
				Reaction 3: 0.2 M	95.4209	79.0123	20.2681	3.15871	17.1094	90.7282
				Reaction 4: 0.3 M	96.0695	69.6198	14.9707	4.44685	10.5239	74.0795
			Simulation A: [Acid] = 0.4 M, Literature data yield
				Reaction 3	95.4209	79.0123	12.1853	3.15871	9.02661	90.7282
				Reaction 4	96.0695	69.6198	11.6017	4.44685	7.15482	74.0795
			Simulation B: [Acid] = Literature data, 90% Yield
				Reaction 3	95.4209	78.3782	20.4321	3.18427	17.2478	90			Reaction 4	OPRD, 2012, 16, 830-835
				Reaction 4	96.0695	84.5819	12.3225	3.66023	8.66226	90
			Simulation C: [Acid] = 0.4 M, 90% Yield
				Reaction 3	95.4209	78.3782	12.2839	3.18427	9.09964	90
				Reaction 4	96.0695	84.5819	9.54939	3.66023	5.88917	90
			Simulation D: [Acid] = 0.4 M, 50% Yield
				Reaction 3	95.4209	43.5434	22.111	5.73169	16.3794	50
				Reaction 4	96.0695	46.99	17.1889	6.58841	10.6005	50

## Sheet: CDI
Literature data reported
		Reaction 5											3,4,5-Trimethoxy benzoic acid (63.00 kg; 0.29 mol), N,N-carbonyldiimidazole (CDI 60.65 kg; 0.37 mol) and ethyl acetate (378 lit) were added to a flask and heated to a temperature of 50-55 °C for 2 hours. After reaction completion as monitored by TLC, the mixture was cooled to 30 °C to 35 °C. 4-Dimethylaminoethoxy benzyl amine (63.42 kg; 0.33 mol) obtained after removal of toluene by distillation …
		OPRD, 2013, 17, 981-984
		METRICS
		Reactant (Limiting Reactant First)	Mass (g)	MW (g mol-1)	equiv	Mol	Catalyst	Mass (g)	Reagent	MW (g mol-1)	Mass (g)	Reaction Solvent	Volume (mL)	Density (g.mL-1)	Mass (g)	Work up Chemical	Mass (g)	Workup Solvent	Volume (mL)	Density (g mL-1)	Mass (g)
Reaction 5		3,4,5-Trimethoxybenzoic acid	63000	212.2	1	296.89			CDI	162.15	60650	EtOAc	378000	0.895	338310						0
		Dimethylaminoethoxybenzylamine	63420	194.28	1.14	326.436			K2CO3	138.21	41000	EtOAc	378000	0.895	338310						0
		Total	126420	406.48		623.326		0			101650		756000		676620		0				0
										Yield (%)	89.3091
										AE (%)	95.5668						mass (g)	MW	mol
										RME (%)	81.4745					Product	103000	388.46	265.15
										MI total (g g-1)	8.7834
										MI RRC (g g-1)	2.21427		Conc (M)	0.392711
										MI Solvents (g g-1)	6.56913
		Reaction 6											(3S)-N-[(1,1-Dimethylethoxy)carbonyl]glycyl-3-[3-bromo- 5-chloro-2-hydroxyphenyl]- -alanine ethyl ester (3). A solution of N-t-Boc-glycine (81.2 kg, 464 mol) at 25 °C in ethyl acetate (428 L) in reactor 1 was transferred to a slurry of CDI (75.2 kg, 464 mol) at 25 °C in ethyl acetate (325 L) in reactor 2. Reactor 1 was rinsed with ethyl acetate (50 L), and the rinse was transferred to reactor 2. …
		OPRD, 2009, 13, 60-63
		METRICS
		Reactant (Limiting Reactant First)	Mass (g)	MW (g mol-1)	equiv	Mol	Catalyst	Mass (g)	Reagent	MW (g mol-1)	Mass (g)	Reaction Solvent	Volume (mL)	Density (g.mL-1)	Mass (g)	Work up Chemical	Mass (g)	Workup Solvent	Volume (mL)	Density (g mL-1)	Mass (g)
Reaction 6		Amine	221600	494.78	1	410.3			CDI	162.15	75237.6	EtOAc	853000	0.895	763435						0
		N-t-Boc- glycine	81200	175.18	1.13	463.523						NMP	239000	1.033	246887						0
																					0
		Total	302800	669.96		873.823		0			75237.6		1092000		1010322		0				0
										Yield (%)	86.6687
										AE (%)	71.6088						mass (g)	MW	mol
										RME (%)	56.3408					Product	170600	479.75	355.602
										MI total (g g-1)	8.1381
										MI RRC (g g-1)	2.21593
										MI Solvents (g g-1)	5.92217		Conc (M)	0.375733
Simulation A: [Acid] = 0.4 M, Literature data yield
		METRICS
		Reactant (Limiting Reactant First)	Mass (g)	MW (g mol-1)	equiv	Mol	Catalyst	Mass (g)	Reagent	MW (g mol-1)	Mass (g)	Reaction Solvent	Volume (mL)	Density (g.mL-1)	Mass (g)	Work up Chemical	Mass (g)	Workup Solvent	Volume (mL)	Density (g mL-1)	Mass (g)
Reaction 5		3,4,5-Trimethoxybenzoic acid	63000	212.2	1	296.89			CDI	162.15	60650	EtOAc	371112	0.895	332145						0
		Dimethylaminoethoxybenzylamine	63420	194.28	1.14	326.436			K2CO3	138.21	41000	EtOAc	371112	0.895	332145						0
		Total	126420	406.48		623.326		0			101650		742224		664290		0				0
										Yield (%)	89.3091
										AE (%)	95.5668						mass (g)	MW	mol
										RME (%)	81.4745					Product	103000	388.46	265.15
										MI total (g g-1)	8.66369
										MI RRC (g g-1)	2.21427		Conc (M)	0.4
										MI Solvents (g g-1)	6.44942
		METRICS
		Reactant (Limiting Reactant First)	Mass (g)	MW (g mol-1)	equiv	Mol	Catalyst	Mass (g)	Reagent	MW (g mol-1)	Mass (g)	Reaction Solvent	Volume (mL)	Density (g.mL-1)	Mass (g)	Work up Chemical	Mass (g)	Workup Solvent	Volume (mL)	Density (g mL-1)	Mass (g)
Reaction 6		Amine	221600	494.78	1	410.3			CDI	162.15	75237.6	EtOAc	800664	0.895	716594						0
		N-t-Boc- glycine	81200	175.18	1.13	463.523						NMP	224336	1.033	231739						0
															0						0
		Total	302800	669.96		873.823		0			75237.6		1025000		948333		0				0
										Yield (%)	86.6687
										AE (%)	71.6088						mass (g)	MW	mol
										RME (%)	56.3408					Product	170600	479.75	355.602
										MI total (g g-1)	7.77474
										MI RRC (g g-1)	2.21593
										MI Solvents (g g-1)	5.55881		Conc (M)	0.400293
Simulation B: [Acid] = Literature data, 90% Yield
		METRICS
		Reactant (Limiting Reactant First)	Mass (g)	MW (g mol-1)	equiv	Mol	Catalyst	Mass (g)	Reagent	MW (g mol-1)	Mass (g)	Reaction Solvent	Volume (mL)	Density (g.mL-1)	Mass (g)	Work up Chemical	Mass (g)	Workup Solvent	Volume (mL)	Density (g mL-1)	Mass (g)
Reaction 5		3,4,5-Trimethoxybenzoic acid	63000	212.2	1	296.89			CDI	162.15	60650	EtOAc	378000	0.895	338310						0
		Dimethylaminoethoxybenzylamine	63420	194.28	1.14	326.436			K2CO3	138.21	41000	EtOAc	378000	0.895	338310						0
		Total	126420	406.48		623.326		0			101650		756000		676620		0				0
										Yield (%)	90
										AE (%)	95.5668						mass (g)	MW	mol
										RME (%)	82.1047					Product	103797	388.46	267.201
										MI total (g g-1)	8.71597
										MI RRC (g g-1)	2.19727		Conc (M)	0.392711
										MI Solvents (g g-1)	6.5187
		METRICS
		Reactant (Limiting Reactant First)	Mass (g)	MW (g mol-1)	equiv	Mol	Catalyst	Mass (g)	Reagent	MW (g mol-1)	Mass (g)	Reaction Solvent	Volume (mL)	Density (g.mL-1)	Mass (g)	Work up Chemical	Mass (g)	Workup Solvent	Volume (mL)	Density (g mL-1)	Mass (g)
Reaction 6		Amine	221600	494.78	1	410.3			CDI	162.15	75237.6	EtOAc	853000	0.895	763435						0
		N-t-Boc- glycine	81200	175.18	1.13	463.523						NMP	239000	1.033	246887						0
																					0
		Total	302800	669.96		873.823		0			75237.6		1092000		1010322		0				0
										Yield (%)	90
										AE (%)	71.6088						mass (g)	MW	mol
										RME (%)	58.5064					Product	177157	479.75	369.27
										MI total (g g-1)	7.83688
										MI RRC (g g-1)	2.13391
										MI Solvents (g g-1)	5.70297		Conc (M)	0.375733
Simulation C: [Acid] = 0.4 M, 90% Yield
		METRICS
		Reactant (Limiting Reactant First)	Mass (g)	MW (g mol-1)	equiv	Mol	Catalyst	Mass (g)	Reagent	MW (g mol-1)	Mass (g)	Reaction Solvent	Volume (mL)	Density (g.mL-1)	Mass (g)	Work up Chemical	Mass (g)	Workup Solvent	Volume (mL)	Density (g mL-1)	Mass (g)
Reaction 5		3,4,5-Trimethoxybenzoic acid	63000	212.2	1	296.89			CDI	162.15	60650	EtOAc	371112	0.895	332145						0
		Dimethylaminoethoxybenzylamine	63420	194.28	1.14	326.436			K2CO3	138.21	41000	EtOAc	371112	0.895	332145						0
		Total	126420	406.48		623.326		0			101650		742224		664290		0				0
										Yield (%)	90
										AE (%)	95.5668						mass (g)	MW	mol
										RME (%)	82.1047					Product	103797	388.46	267.201
										MI total (g g-1)	8.59719
										MI RRC (g g-1)	2.19727		Conc (M)	0.4
										MI Solvents (g g-1)	6.39991
		METRICS
		Reactant (Limiting Reactant First)	Mass (g)	MW (g mol-1)	equiv	Mol	Catalyst	Mass (g)	Reagent	MW (g mol-1)	Mass (g)	Reaction Solvent	Volume (mL)	Density (g.mL-1)	Mass (g)	Work up Chemical	Mass (g)	Workup Solvent	Volume (mL)	Density (g mL-1)	Mass (g)
Reaction 6		Amine	221600	494.78	1	410.3			CDI	162.15	75237.6	EtOAc	800664	0.895	716594						0
		N-t-Boc- glycine	81200	175.18	1.13	463.523						NMP	224336	1.033	231739						0
																					0
		Total	302800	669.96		873.823		0			75237.6		1025000		948333		0				0
										Yield (%)	90
										AE (%)	71.6088						mass (g)	MW	mol
										RME (%)	58.5064					Product	177157	479.75	369.27
										MI total (g g-1)	7.48697
										MI RRC (g g-1)	2.13391
										MI Solvents (g g-1)	5.35306		Conc (M)	0.400293
Simulation D: [Acid] = 0.4 M, 50% Yield
		METRICS
		Reactant (Limiting Reactant First)	Mass (g)	MW (g mol-1)	equiv	Mol	Catalyst	Mass (g)	Reagent	MW (g mol-1)	Mass (g)	Reaction Solvent	Volume (mL)	Density (g.mL-1)	Mass (g)	Work up Chemical	Mass (g)	Workup Solvent	Volume (mL)	Density (g mL-1)	Mass (g)
Reaction 5		3,4,5-Trimethoxybenzoic acid	63000	212.2	1	296.89			CDI	162.15	60650	EtOAc	378000	0.895	338310						0
		Dimethylaminoethoxybenzylamine	63420	194.28	1.14	326.436			K2CO3	138.21	41000	EtOAc	371112	0.895	332145						0
		Total	126420	406.48		623.326		0			101650		749112		670455		0				0
										Yield (%)	50
										AE (%)	95.5668						mass (g)	MW	mol
										RME (%)	45.6137					Product	57664.9	388.46	148.445
										MI total (g g-1)	15.5818
										MI RRC (g g-1)	3.95509		Conc (M)	0.396322
										MI Solvents (g g-1)	11.6267
		METRICS
		Reactant (Limiting Reactant First)	Mass (g)	MW (g mol-1)	equiv	Mol	Catalyst	Mass (g)	Reagent	MW (g mol-1)	Mass (g)	Reaction Solvent	Volume (mL)	Density (g.mL-1)	Mass (g)	Work up Chemical	Mass (g)	Workup Solvent	Volume (mL)	Density (g mL-1)	Mass (g)
Reaction 6		Amine	221600	494.78	1	410.3			CDI	162.15	75237.6	EtOAc	800664	0.895	716594						0
		N-t-Boc- glycine	81200	175.18	1.13	463.523						NMP	224336	1.033	231739						0
																					0
		Total	302800	669.96		873.823		0			75237.6		1025000		948333		0				0
										Yield (%)	50
										AE (%)	71.6088						mass (g)	MW	mol
										RME (%)	32.5035					Product	98420.7	479.75	205.15
										MI total (g g-1)	13.4765
										MI RRC (g g-1)	3.84104
										MI Solvents (g g-1)	9.63551		Conc (M)	0.400293
SUMMARY
			Literature data and simulation A-D with N,N-carbonyldiimidazole as coupling reagent
			Entry	Substrate	AE	RME	PMI	PMIRRC	PMIsolv	Yield
					(%)	(%)	(g g-1)	(g g-1)	(g g-1)	(%)
			Literature data reported										Reaction 5	OPRD, 2013, 17, 981-984
				Reaction 5: 0.4 M	95.5668	81.4745	8.7834	2.21427	6.56913	89.3091
				Reaction 6: 0.4 M	71.6088	56.3408	8.1381	2.21593	5.92217	86.6687
			Simulation A: [Acid] = 0.4 M, Literature data yield
				Reaction 5	95.5668	81.4745	8.66369	2.21427	6.44942	89.3091
				Reaction 6	71.6088	56.3408	7.77474	2.21593	5.55881	86.6687
			Simulation B: [Acid] = Literature data, 90% Yield
				Reaction 5	95.5668	82.1047	8.71597	2.19727	6.5187	90
				Reaction 6	71.6088	58.5064	7.83688	2.13391	5.70297	90
			Simulation C: [Acid] = 0.4 M, 90% Yield
				Reaction 5	95.5668	82.1047	8.59719	2.19727	6.39991	90
				Reaction 6	71.6088	58.5064	7.48697	2.13391	5.35306	90
			Simulation D: [Acid] = 0.4 M, 50% Yield
				Reaction 5	95.5668	45.6137	15.5818	3.95509	11.6267	50			Reaction 6	OPRD, 2009, 13, 60-63
				Reaction 6	71.6088	32.5035	13.4765	3.84104	9.63551	50

## Sheet: DCC
Literature data reported
		Reaction 7
		OPRD, 1999, 3, 409-415												To a solution of 1-[(2-nitrophenylamino)carbonyl]-Lproline (11, 88.0 g, 0.315 mol) in THF (530 mL) was added a solution of above (S)-3-(2-naphthyl)alanyl-N-benzyl-Nmethylamide free base preparation in THF (200 mL) over 15 min while maintaining the internal temperature at 22 °C. THF (50 mL) was used to wash the addition funnel and added to the reaction mixture. 1-Hydroxybenzotriazole (40.54g, 0.3 …
		METRICS
		Reactant (Limiting Reactant First)	Mass (g)	MW (g mol-1)	equiv	Mol	Catalyst	Mass (g)	Reagent	MW (g mol-1)	Mass (g)	Reaction Solvent	Volume (mL)	Density (g.mL-1)	Mass (g)	Work up Chemical	Mass (g)	Workup Solvent	Volume (mL)	Density (g mL-1)	Mass (g)
		(S)-3-(2-naphthyl)alanyl-N-benzyl-N-methylamide	106.46	318.42	1	0.334338			NaOH	40	22.5	i-PrOAc	650	0.872	566.8						0
		1-[(2-nitrophenylamino)carbonyl]-L-proline	88	279.25	0.942548	0.31513			HOBt	135.13	40.54	THF	880	0.883	777.04						0
									DCC	206.33	62.518	water NaOH	450	1	450
		Total	194.46	597.67		0.649468		0			125.558		1980		1793.84		0				0
										Yield (%)	77.3984
										AE (%)	96.9866						mass (g)	MW	mol
										RME (%)	77.1367					Product	150	579.66	0.258772
										MI total (g g-1)	14.0924
										MI RRC (g g-1)	2.13345		Conc (M)	0.168858
										MI Solvents (g g-1)	11.9589
		Reaction 8												Synthesis of 1-(4-Hydroxybenzoyl)-4-methylpiperazine, 6, using DCC. N-methylpiperazine (226 mL, 2.0 mol) was added slowly (15 min) to a slurry of 4-hydroxybenzoic acid (229 g, 2.0 mol) in 2 L of ethyl acetate at 50-70 °C. A solution of dicyclohexylcarbodiimide (438 g, 2.1mol) in 0.4 L of ethyl acetate was added over 1.5 h to the salt slurry at 70-78 °C. The mixture was refluxed 1 h and followed b…
		OPRD, 2002, 6, 54-63
		METRICS
		Reactant (Limiting Reactant First)	Mass (g)	MW (g mol-1)	equiv	Mol	Catalyst	Mass (g)	Reagent	MW (g mol-1)	Mass (g)	Reaction Solvent	Volume (mL)	Density (g.mL-1)	Mass (g)	Work up Chemical	Mass (g)	Workup Solvent	Volume (mL)	Density (g mL-1)	Mass (g)			N-Methylpiperazine
		4-hydroxybenzoic acid	276.24	138.12	1	2			DCC	206.33	438	EtOAc	2400	0.895	2148						0			Density =	0.902
		N-methylpiperazine	203.852	100.17	1.01753	2.03506															0			Volume =	226
																					0
		Total	480.092	238.29		4.03506		0			438		2400		2148		0				0
										Yield (%)	86.2578
										AE (%)	92.4378						mass (g)	MW	mol
										RME (%)	79.1515					Product	380	220.27	1.72516
										MI total (g g-1)	8.06866
										MI RRC (g g-1)	2.41603
										MI Solvents (g g-1)	5.65263		Conc (M)	0.833333
Simulation A: [Acid] = 0.4 M, Literature data yield
		METRICS
		Reactant (Limiting Reactant First)	Mass (g)	MW (g mol-1)	equiv	Mol	Catalyst	Mass (g)	Reagent	MW (g mol-1)	Mass (g)	Reaction Solvent	Volume (mL)	Density (g.mL-1)	Mass (g)	Work up Chemical	Mass (g)	Workup Solvent	Volume (mL)	Density (g mL-1)	Mass (g)
Reaction 7		(S)-3-(2-naphthyl)alanyl-N-benzyl-N-methylamide	106.46	318.42	1	0.334338			NaOH	40	22.5	i-PrOAc	246.212	0.872	214.697						0
		1-[(2-nitrophenylamino)carbonyl]-L-proline	88	279.25	0.942548	0.31513			HOBt	135.13	40.54	THF	333.333	0.883	294.333						0
									DCC	206.33	62.518	water NaOH	170.455	1	170.455
		Total	194.46	597.67		0.649468		0			125.558		750		679.485		0				0
										Yield (%)	77.3984
										AE (%)	96.9866						mass (g)	MW	mol
										RME (%)	77.1367					Product	150	579.66	0.258772
										MI total (g g-1)	6.66335
										MI RRC (g g-1)	2.13345		Conc (M)	0.445784
										MI Solvents (g g-1)	4.5299
		METRICS
		Reactant (Limiting Reactant First)	Mass (g)	MW (g mol-1)	equiv	Mol	Catalyst	Mass (g)	Reagent	MW (g mol-1)	Mass (g)	Reaction Solvent	Volume (mL)	Density (g.mL-1)	Mass (g)	Work up Chemical	Mass (g)	Workup Solvent	Volume (mL)	Density (g mL-1)	Mass (g)
Reaction 8		4-hydroxybenzoic acid	276.24	138.12	1	2			DCC	206.33	433.293	EtOAc	5000	0.895	4475						0
		N-methylpiperazine	203.852	100.17	1.01753	2.03506															0
																					0
		Total	480.092	238.29		4.03506		0			433.293		5000		4475		0				0
										Yield (%)	86.2578
										AE (%)	92.4378						mass (g)	MW	mol
										RME (%)	79.1515					Product	380	220.27	1.72516
										MI total (g g-1)	14.18
										MI RRC (g g-1)	2.40364
										MI Solvents (g g-1)	11.7763		Conc (M)	0.4
Simulation B: [Acid] = Literature data, 90% Yield
		METRICS
		Reactant (Limiting Reactant First)	Mass (g)	MW (g mol-1)	equiv	Mol	Catalyst	Mass (g)	Reagent	MW (g mol-1)	Mass (g)	Reaction Solvent	Volume (mL)	Density (g.mL-1)	Mass (g)	Work up Chemical	Mass (g)	Workup Solvent	Volume (mL)	Density (g mL-1)	Mass (g)
Reaction 7		(S)-3-(2-naphthyl)alanyl-N-benzyl-N-methylamide	106.46	318.42	1	0.334338			NaOH	40	22.5	i-PrOAc	650	0.872	566.8						0
		1-[(2-nitrophenylamino)carbonyl]-L-proline	88	279.25	0.942548	0.31513			HOBt	135.13	40.54	THF	880	0.883	777.04						0
									DCC	206.33	62.518	water NaOH	450	1	450
		Total	194.46	597.67		0.649468		0			125.558		1980		1793.84		0				0
										Yield (%)	90
										AE (%)	96.9866						mass (g)	MW	mol
										RME (%)	89.6957					Product	174.422	579.66	0.300904
										MI total (g g-1)	12.1192
										MI RRC (g g-1)	1.83473		Conc (M)	0.168858
										MI Solvents (g g-1)	10.2845
		METRICS
		Reactant (Limiting Reactant First)	Mass (g)	MW (g mol-1)	equiv	Mol	Catalyst	Mass (g)	Reagent	MW (g mol-1)	Mass (g)	Reaction Solvent	Volume (mL)	Density (g.mL-1)	Mass (g)	Work up Chemical	Mass (g)	Workup Solvent	Volume (mL)	Density (g mL-1)	Mass (g)
Reaction 8		4-hydroxybenzoic acid	276.24	138.12	1	2			DCC	206.33	433.293	EtOAc	2400	0.895	2148						0
		N-methylpiperazine	203.85	100.17	1.01752	2.03504															0
																					0
		Total	480.09	238.29		4.03504		0			433.293		2400		2148		0				0
										Yield (%)	90
										AE (%)	92.4378						mass (g)	MW	mol
										RME (%)	82.5858					Product	396.486	220.27	1.8
										MI total (g g-1)	7.72129
										MI RRC (g g-1)	2.3037
										MI Solvents (g g-1)	5.41759		Conc (M)	0.833333
Simulation C: [Acid] = 0.4 M, 90% Yield
		METRICS
		Reactant (Limiting Reactant First)	Mass (g)	MW (g mol-1)	equiv	Mol	Catalyst	Mass (g)	Reagent	MW (g mol-1)	Mass (g)	Reaction Solvent	Volume (mL)	Density (g.mL-1)	Mass (g)	Work up Chemical	Mass (g)	Workup Solvent	Volume (mL)	Density (g mL-1)	Mass (g)
Reaction 7		(S)-3-(2-naphthyl)alanyl-N-benzyl-N-methylamide	106.46	318.42	1	0.334338			NaOH	40	22.5	i-PrOAc	246.212	0.872	214.697						0
		1-[(2-nitrophenylamino)carbonyl]-L-proline	88	279.25	0.942548	0.31513			HOBt	135.13	40.54	THF	333.333	0.883	294.333						0
									DCC	206.33	62.518	water NaOH	170.455	1	170.455
		Total	194.46	597.67		0.649468		0			125.558		750		679.485		0				0
										Yield (%)	90
										AE (%)	96.9866						mass (g)	MW	mol
										RME (%)	80.4844					Product	156.51	579.66	0.300904
										MI total (g g-1)	6.38619
										MI RRC (g g-1)	2.04471		Conc (M)	0.445784
										MI Solvents (g g-1)	4.34148
		METRICS
		Reactant (Limiting Reactant First)	Mass (g)	MW (g mol-1)	equiv	Mol	Catalyst	Mass (g)	Reagent	MW (g mol-1)	Mass (g)	Reaction Solvent	Volume (mL)	Density (g.mL-1)	Mass (g)	Work up Chemical	Mass (g)	Workup Solvent	Volume (mL)	Density (g mL-1)	Mass (g)
Reaction 8		4-hydroxybenzoic acid	276.24	138.12	1	2			DCC	206.33	433.293	EtOAc	5000	0.895	4475						0
		N-methylpiperazine	203.85	100.17	1.01752	2.03504															0
																					0
		Total	480.09	238.29		4.03504		0			433.293		5000		4475		0				0
										Yield (%)	90.0009
										AE (%)	92.4378						mass (g)	MW	mol
										RME (%)	82.5866					Product	396.49	220.27	1.80002
										MI total (g g-1)	13.5902
										MI RRC (g g-1)	2.30367
										MI Solvents (g g-1)	11.2865		Conc (M)	0.4
Simulation D: [Acid] = 0.4 M, 50% Yield
		METRICS
		Reactant (Limiting Reactant First)	Mass (g)	MW (g mol-1)	equiv	Mol	Catalyst	Mass (g)	Reagent	MW (g mol-1)	Mass (g)	Reaction Solvent	Volume (mL)	Density (g.mL-1)	Mass (g)	Work up Chemical	Mass (g)	Workup Solvent	Volume (mL)	Density (g mL-1)	Mass (g)
Reaction 7		(S)-3-(2-naphthyl)alanyl-N-benzyl-N-methylamide	106.46	318.42	1	0.334338			NaOH	40	22.5	i-PrOAc	246.212	0.872	214.697						0
		1-[(2-nitrophenylamino)carbonyl]-L-proline	88	279.25	0.942548	0.31513			HOBt	135.13	40.54	THF	333.333	0.883	294.333						0
									DCC	206.33	62.518	water NaOH	170.455	1	170.455
		Total	194.46	597.67		0.649468		0			125.558		750		679.485		0				0
										Yield (%)	50
										AE (%)	96.9866						mass (g)	MW	mol
										RME (%)	49.831					Product	96.9013	579.66	0.167169
										MI total (g g-1)	10.3147
										MI RRC (g g-1)	3.30252		Conc (M)	0.445784
										MI Solvents (g g-1)	7.01214
		METRICS
		Reactant (Limiting Reactant First)	Mass (g)	MW (g mol-1)	equiv	Mol	Catalyst	Mass (g)	Reagent	MW (g mol-1)	Mass (g)	Reaction Solvent	Volume (mL)	Density (g.mL-1)	Mass (g)	Work up Chemical	Mass (g)	Workup Solvent	Volume (mL)	Density (g mL-1)	Mass (g)
Reaction 8		4-hydroxybenzoic acid	276.24	138.12	1	2			DCC	206.33	433.293	EtOAc	5000	0.895	4475						0
		N-methylpiperazine	203.85	100.17	1.01752	2.03504															0
																					0
		Total	480.09	238.29		4.03504		0			433.293		5000		4475		0				0
										Yield (%)	50
										AE (%)	92.4378						mass (g)	MW	mol
										RME (%)	45.881					Product	220.27	220.27	1
										MI total (g g-1)	24.4626
										MI RRC (g g-1)	4.14665
										MI Solvents (g g-1)	20.316		Conc (M)	0.4
SUMMARY
			Literature data and simulation A-D with N,N'-dicycloheyxylcarbodiimide as coupling reagent
			Entry	Substrate	AE	RME	PMI	PMIRRC	PMIsolv	Yield
					(%)	(%)	(g g-1)	(g g-1)	(g g-1)	(%)
			Literature data reported										Reaction 7	OPRD, 1999, 3, 409-415
				Reaction 7: 0.2 M	96.9866	77.1367	14.0924	2.13345	11.9589	77.3984
				Reaction 8: 0.8 M	92.4378	79.1515	8.06866	2.41603	5.65263	86.2578
			Simulation A: [Acid] = 0.4 M, Literature data yield
				Reaction 7	96.9866	77.1367	6.66335	2.13345	4.5299	77.3984
				Reaction 8	92.4378	79.1515	14.18	2.40364	11.7763	86.2578
			Simulation B: [Acid] = Literature data, 90% Yield
				Reaction 7	96.9866	89.6957	12.1192	1.83473	10.2845	90
				Reaction 8	92.4378	82.5858	7.72129	2.3037	5.41759	90
			Simulation C: [Acid] = 0.4 M, 90% Yield
				Reaction 7	96.9866	80.4844	6.38619	2.04471	4.34148	90
				Reaction 8	92.4378	82.5866	13.5902	2.30367	11.2865	90.0009
			Simulation D: [Acid] = 0.4 M, 50% Yield
				Reaction 7	96.9866	49.831	10.3147	3.30252	7.01214	50			Reaction 8	OPRD, 2002, 6, 54-63
				Reaction 8	92.4378	45.881	24.4626	4.14665	20.316	50

## Sheet: EDC
Literature data reported
		Reaction 9												To a reaction vessel was charged ethanol (358 L), 314 (59.94 kg, 264.4 mol), HOBt (2.04 kg, 13.32 mol), (S)-BocAla (51.28 kg, 271.0 mol), and NMM (57.30 kg, 566.5 mol) to form a solution. EDC (56.58 kg, 295.1 mol) was then charged, and the reaction mixture was stirred at 25 °C for 10 h followed by the slow addition of water (541 L) over 1 h. The resulting slurry was filtered, rinsed with 600 L of…
		OPRD, 2009, 13, 310-314
		METRICS
		Reactant (Limiting Reactant First)	Mass (g)	MW (g mol-1)	equiv	Mol	Catalyst	Mass (g)	Reagent	MW (g mol-1)	Mass (g)	Reaction Solvent	Volume (mL)	Density (g.mL-1)	Mass (g)	Work up Chemical	Mass (g)	Workup Solvent	Volume (mL)	Density (g mL-1)	Mass (g)
		Amine	59940	226.71	1	264.391			HOBt	135.126	1799.88	EtOH	358000	0.789	282462						0
		(S)-BocAla	51280	189.21	1.02508	271.022			NMM	101.15	57301.5										0
									EDC HCl	191.7	56570.7
		Total	111220	415.92		535.412		0			115672		358000		282462		0				0
										Yield (%)	92.2496
										AE (%)	86.9013						mass (g)	MW	mol
										RME (%)	79.2618					Product	88155	361.44	243.899
										MI total (g g-1)	5.77794
										MI RRC (g g-1)	2.57379		Conc (M)	0.738521
										MI Solvents (g g-1)	3.20415
		Reaction 10													N-[1-(3-phenylpropane-1-yl)piperidin-4-yl]-5-thia-1,8bdiazaacenathenaphthylen- 4-carboxamide (4). To a solution of 7â2HCl (2.24 kg) in DMF (13 L) was added NEt3 (2.15 L) dropwise at 20-30 °C. The mixture was stirred for 30 min at the same temperature. To the resulting mixture was added 1 (1.595 kg), HOBt (225 g) and EDCI (1.47 kg), and the whole was stirred for 2 h at 70-80 °C. A solution of NaHC…
		OPRD, 2002, 6, 238-241
		METRICS
		Reactant (Limiting Reactant First)	Mass (g)	MW (g mol-1)	equiv	Mol	Catalyst	Mass (g)	Reagent	MW (g mol-1)	Mass (g)	Reaction Solvent	Volume (mL)	Density (g.mL-1)	Mass (g)	Work up Chemical	Mass (g)	Workup Solvent	Volume (mL)	Density (g mL-1)	Mass (g)
		Carboxylic acid	1595	218.23	1	7.3088			NEt3	101.19	1569.5	DMF	13000	0.945	12285						0
		Piperidine amine	2240	291.26	1.05225	7.69072			HOBt	135.12	225										0
									EDCI	191.7	1470										0
		Total	3835	509.49		14.9995		0			3264.5		13000		12285		0				0
										Yield (%)	76.1644
										AE (%)	82.1527						mass (g)	MW	mol
										RME (%)	60.7562					Product	2330	418.56	5.5667
										MI total (g g-1)	8.31953
										MI RRC (g g-1)	3.047
										MI Solvents (g g-1)	5.27253		Conc (M)	0.562216
Simulation A: [Acid] = 0.4 M, Literature data yield
		METRICS
		Reactant (Limiting Reactant First)	Mass (g)	MW (g mol-1)	equiv	Mol	Catalyst	Mass (g)	Reagent	MW (g mol-1)	Mass (g)	Reaction Solvent	Volume (mL)	Density (g.mL-1)	Mass (g)	Work up Chemical	Mass (g)	Workup Solvent	Volume (mL)	Density (g mL-1)	Mass (g)
Reaction 9		Amine	59940	226.7	1	264.402			HOBt	135.126	1799.88	EtOH	660000	0.789	520740						0
		(S)-BocAla	51280	189.21	1.02504	271.022			NMM	101.15	57301.5										0
									EDC HCl	191.7	56570.7
		Total	111220	415.91		535.424		0			115672		660000		520740		0				0
										Yield (%)	92.2456
										AE (%)	86.9034						mass (g)	MW	mol
										RME (%)	79.2618					Product	88155	361.44	243.899
										MI total (g g-1)	8.48088
										MI RRC (g g-1)	2.57379		Conc (M)	0.40061
										MI Solvents (g g-1)	5.9071
		METRICS
		Reactant (Limiting Reactant First)	Mass (g)	MW (g mol-1)	equiv	Mol	Catalyst	Mass (g)	Reagent	MW (g mol-1)	Mass (g)	Reaction Solvent	Volume (mL)	Density (g.mL-1)	Mass (g)	Work up Chemical	Mass (g)	Workup Solvent	Volume (mL)	Density (g mL-1)	Mass (g)
Reaction 10		Carboxylic acid	1595	218.23	1	7.3088			NEt3	101.19	1569.5	DMF	18250	0.945	17246.2						0
		Piperine amine	2240	291.26	1.05225	7.69072			HOBt	135.12	225										0
									EDCI		1470										0
		Total	3835	509.49		14.9995		0			3264.5		18250		17246.2		0				0
										Yield (%)	76.1644
										AE (%)	82.1527						mass (g)	MW	mol
										RME (%)	60.7562					Product	2330	418.56	5.5667
										MI total (g g-1)	10.4488
										MI RRC (g g-1)	3.047
										MI Solvents (g g-1)	7.40182		Conc (M)	0.400482
Simulation B: [Acid] = Literature data, 90% Yield
		METRICS
		Reactant (Limiting Reactant First)	Mass (g)	MW (g mol-1)	equiv	Mol	Catalyst	Mass (g)	Reagent	MW (g mol-1)	Mass (g)	Reaction Solvent	Volume (mL)	Density (g.mL-1)	Mass (g)	Work up Chemical	Mass (g)	Workup Solvent	Volume (mL)	Density (g mL-1)	Mass (g)
Reaction 9		Amine	59940	226.7	1	264.402			HOBt	135.126	1799.88	EtOH	358000	0.789	282462						0
		(S)-BocAla	51280	189.21	1.02504	271.022			NMM	101.15	57301.5										0
									EDC HCl	191.7	56570.7
		Total	111220	415.91		535.424		0			115672		358000		282462		0				0
										Yield (%)	90
										AE (%)	86.9034						mass (g)	MW	mol
										RME (%)	77.3323					Product	86009	361.44	237.962
										MI total (g g-1)	5.9221
										MI RRC (g g-1)	2.638		Conc (M)	0.738554
										MI Solvents (g g-1)	3.2841
		METRICS
		Reactant (Limiting Reactant First)	Mass (g)	MW (g mol-1)	equiv	Mol	Catalyst	Mass (g)	Reagent	MW (g mol-1)	Mass (g)	Reaction Solvent	Volume (mL)	Density (g.mL-1)	Mass (g)	Work up Chemical	Mass (g)	Workup Solvent	Volume (mL)	Density (g mL-1)	Mass (g)
Reaction 10		Carboxylic acid	1595	218.23	1	7.3088			NEt3	101.19	1569.5	DMF	13000	0.945	12285						0
		Piperine amine	2240	291.26	1.05225	7.69072			HOBt	135.12	225										0
									EDCI		1470										0
		Total	3835	509.49		14.9995		0			3264.5		13000		12285		0				0
										Yield (%)	90
										AE (%)	82.1527						mass (g)	MW	mol
										RME (%)	71.7928					Product	2753.26	418.56	6.57792
										MI total (g g-1)	7.04058
										MI RRC (g g-1)	2.57858
										MI Solvents (g g-1)	4.46199		Conc (M)	0.562216
Simulation C: [Acid] = 0.4 M, 90% Yield
		METRICS
		Reactant (Limiting Reactant First)	Mass (g)	MW (g mol-1)	equiv	Mol	Catalyst	Mass (g)	Reagent	MW (g mol-1)	Mass (g)	Reaction Solvent	Volume (mL)	Density (g.mL-1)	Mass (g)	Work up Chemical	Mass (g)	Workup Solvent	Volume (mL)	Density (g mL-1)	Mass (g)
Reaction 9		Amine	59940	226.7	1	264.402			HOBt	135.126	1799.88	EtOH	660000	0.789	520740						0
		(S)-BocAla	51280	189.21	1.02504	271.022			NMM	101.15	57301.5										0
									EDC HCl	191.7	56570.7
		Total	111220	415.91		535.424		0			115672		660000		520740		0				0
										Yield (%)	90
										AE (%)	86.9034						mass (g)	MW	mol
										RME (%)	77.3323					Product	86009	361.44	237.962
										MI total (g g-1)	8.69249
										MI RRC (g g-1)	2.638		Conc (M)	0.40061
										MI Solvents (g g-1)	6.05448
		METRICS
		Reactant (Limiting Reactant First)	Mass (g)	MW (g mol-1)	equiv	Mol	Catalyst	Mass (g)	Reagent	MW (g mol-1)	Mass (g)	Reaction Solvent	Volume (mL)	Density (g.mL-1)	Mass (g)	Work up Chemical	Mass (g)	Workup Solvent	Volume (mL)	Density (g mL-1)	Mass (g)
Reaction 10		Carboxylic acid	1595	218.23	1	7.3088			NEt3	101.19	1569.5	DMF	18250	0.945	17246.2						0
		Piperine amine	2240	291.26	1.05225	7.69072			HOBt	135.12	225										0
									EDCI		1470										0
		Total	3835	509.49		14.9995		0			3264.5		18250		17246.2		0				0
										Yield (%)	90
										AE (%)	82.1527						mass (g)	MW	mol
										RME (%)	71.7928					Product	2753.26	418.56	6.57792
										MI total (g g-1)	8.84253
										MI RRC (g g-1)	2.57858
										MI Solvents (g g-1)	6.26395		Conc (M)	0.400482
Simulation D: [Acid] = 0.4 M, 50% Yield
		METRICS
		Reactant (Limiting Reactant First)	Mass (g)	MW (g mol-1)	equiv	Mol	Catalyst	Mass (g)	Reagent	MW (g mol-1)	Mass (g)	Reaction Solvent	Volume (mL)	Density (g.mL-1)	Mass (g)	Work up Chemical	Mass (g)	Workup Solvent	Volume (mL)	Density (g mL-1)	Mass (g)
Reaction 9		Amine	59940	226.7	1	264.402			HOBt	135.126	1799.88	EtOH	660000	0.789	520740						0
		(S)-BocAla	51280	189.21	1.02504	271.022			NMM	101.15	57301.5										0
									EDC HCl	191.7	56570.7
		Total	111220	415.91		535.424		0			115672		660000		520740		0				0
										Yield (%)	50
										AE (%)	86.9034						mass (g)	MW	mol
										RME (%)	42.9624					Product	47782.8	361.44	132.201
										MI total (g g-1)	15.6465
										MI RRC (g g-1)	4.74841		Conc (M)	0.40061
										MI Solvents (g g-1)	10.8981
		METRICS
		Reactant (Limiting Reactant First)	Mass (g)	MW (g mol-1)	equiv	Mol	Catalyst	Mass (g)	Reagent	MW (g mol-1)	Mass (g)	Reaction Solvent	Volume (mL)	Density (g.mL-1)	Mass (g)	Work up Chemical	Mass (g)	Workup Solvent	Volume (mL)	Density (g mL-1)	Mass (g)
Reaction 10		Carboxylic acid	1595	218.23	1	7.3088			NEt3	101.19	1569.5	DMF	18250	0.945	17246.2						0
		Piperine amine	2240	291.26	1.05225	7.69072			HOBt	135.12	225										0
									EDCI		1470										0
		Total	3835	509.49		14.9995		0			3264.5		18250		17246.2		0				0
										Yield (%)	50
										AE (%)	82.1527						mass (g)	MW	mol
										RME (%)	39.8849					Product	1529.59	418.56	3.6544
										MI total (g g-1)	15.9166
										MI RRC (g g-1)	4.64145
										MI Solvents (g g-1)	11.2751		Conc (M)	0.400482
SUMMARY
			Literature data and simulation A-D with 1-ethyl-3-(3-dimethylaminopropyl)carbodiimide as coupling reagent
			Entry	Substrate	AE	RME	PMI	PMIRRC	PMIsolv	Yield
					(%)	(%)	(g g-1)	(g g-1)	(g g-1)	(%)
			Literature data reported										Reaction 9	OPRD, 2009, 13, 310-314
				Reaction 9: 0.7 M	86.9013	79.2618	5.77794	2.57379	3.20415	92.2496
				Reaction 10: 0.6 M	82.1527	60.7562	8.31953	3.047	5.27253	76.1644
			Simulation A: [Acid] = 0.4 M, Literature data yield
				Reaction 9	86.9034	79.2618	8.48088	2.57379	5.9071	92.2456
				Reaction 10	82.1527	60.7562	10.4488	3.047	7.40182	76.1644
			Simulation B: [Acid] = Literature data, 90% Yield
				Reaction 9	86.9034	77.3323	5.9221	2.638	3.2841	90
				Reaction 10	82.1527	71.7928	7.04058	2.57858	4.46199	90
			Simulation C: [Acid] = 0.4 M, 90% Yield
				Reaction 9	86.9034	77.3323	8.69249	2.638	6.05448	90
				Reaction 10	82.1527	71.7928	8.84253	2.57858	6.26395	90
			Simulation D: [Acid] = 0.4 M, 50% Yield
				Reaction 9	86.9034	42.9624	15.6465	4.74841	10.8981	50			Reaction 10	OPRD, 2002, 6, 238-241
				Reaction 10	82.1527	39.8849	15.9166	4.64145	11.2751	50

## Sheet: PivCl
Literature data reported
		Reaction 11											(S)-3-Methylpentanoic Acid, ((1′S,2′S)-2′-Hydroxy-1′- methyl-2′-phenylethyl)methyl-amide (7). To a solution of 6 (2.32 kg, 20.00 mol) in CH2Cl2 (14 L) at -5 °C was added Et3N (2.93 L, 2.12 kg, 21.00 mol, 1.05 equiv), followed by pivaloyl chloride (2.46 L, 2.41 kg, 20.00 mol, 1.00 equiv), while maintaining the internal temperature <0 °C. The resultant slurry was stirred for 1 h, and then Et3N (2.9…
		OPRD, 2009, 13, 463-467
		METRICS
		Reactant (Limiting Reactant First)	Mass (g)	MW (g mol-1)	equiv	Mol	Catalyst	Mass (g)	Reagent	MW (g mol-1)	Mass (g)	Reaction Solvent	Volume (mL)	Density (g.mL-1)	Mass (g)	Work up Chemical	Mass (g)	Workup Solvent	Volume (mL)	Density (g mL-1)	Mass (g)
		Carboxylic acid	2320	116.16	1	19.9725			NEt3	101.19	4249.98	DCM	14000	1.33	18620						0
		(1S,2S)-(+)-Pseudoephedrine	3300	165.24	0.999925	19.971			PivCl	120.58	2411.6										0
		Total	5620	281.4		39.9434		0			6661.58		14000		18620		0				0
										Yield (%)	100
										AE (%)	93.5963						mass (g)	MW	mol
										RME (%)	93.6004					Product	5260.34	263.38	19.9725
										MI total (g g-1)	5.87444
										MI RRC (g g-1)	2.33475		Conc (M)	1.4266
										MI Solvents (g g-1)	3.53969
		Reaction 12											((S, E)-4-Benzyl-3-(3-(3,5-difluorophenyl)-4,4,4-trifluorobut- 2-enoyl)oxazolidin-2-one (17). Acid 9 (11 kg, 43.63 mol), (S)- (-)-4-benzyl-2-oxazolidinone (8.5 kg, 47.97 mol, 1.1 equiv) and LiCl (3.7 kg, 87.28 mol, 2 equiv) were added to THF (95.7 kg) cooled to -15 °C. The temperature was adjusted to 20 °C, the mixture was stirred for 30 min and then cooled to -21 °C. Trimethyl acetyl chloride (1…
		OPRD, 2009, 13, 1161-1168
		METRICS
		Reactant (Limiting Reactant First)	Mass (g)	MW (g mol-1)	equiv	Mol	Catalyst	Mass (g)	Reagent	MW (g mol-1)	Mass (g)	Reaction Solvent	Volume (mL)	Density (g.mL-1)	Mass (g)	Work up Chemical	Mass (g)	Workup Solvent	Volume (mL)	Density (g mL-1)	Mass (g)
		Acid 9	11000	252.14	1	43.6266			LiCl	42.39	3699.8	THF	108381	0.883	95700.4						0
		(S)-(-)-4-benzyl-2-oxazolidinone	8500	177.2	1.09952	47.9684			PivCl	120.58	13087.8										0
									NEt3	101.19	11499.2										0
		Total	19500	429.34		91.595		0			28286.8		108381		95700.4		0				0
										Yield (%)	92.9511
										AE (%)	95.8052						mass (g)	MW	mol
										RME (%)	85.5385					Product	16680	411.33	40.5514
										MI total (g g-1)	8.60235
										MI RRC (g g-1)	2.86492
										MI Solvents (g g-1)	5.73744		Conc (M)	0.40253
Simulation A: [Acid] = 0.4 M, Literature data yield
		METRICS
		Reactant (Limiting Reactant First)	Mass (g)	MW (g mol-1)	equiv	Mol	Catalyst	Mass (g)	Reagent	MW (g mol-1)	Mass (g)	Reaction Solvent	Volume (mL)	Density (g.mL-1)	Mass (g)	Work up Chemical	Mass (g)	Workup Solvent	Volume (mL)	Density (g mL-1)	Mass (g)
Reaction 11		Carboxylic acid	2320	116.16	1	19.9725			NEt3	101.19	4249.98	DCM	49900	1.33	66367						0
		(1S,2S)-(+)-Pseudoephedrine	3300	165.24	0.999925	19.971			PivCl	120.58	2411.6				0						0
		Total	5620	281.4		39.9434		0			6661.58		49900		66367		0				0
										Yield (%)	100
										AE (%)	93.5963						mass (g)	MW	mol
										RME (%)	93.6004					Product	5260.34	263.38	19.9725
										MI total (g g-1)	14.9512
										MI RRC (g g-1)	2.33475		Conc (M)	0.40025
										MI Solvents (g g-1)	12.6165
		METRICS
		Reactant (Limiting Reactant First)	Mass (g)	MW (g mol-1)	equiv	Mol	Catalyst	Mass (g)	Reagent	MW (g mol-1)	Mass (g)	Reaction Solvent	Volume (mL)	Density (g.mL-1)	Mass (g)	Work up Chemical	Mass (g)	Workup Solvent	Volume (mL)	Density (g mL-1)	Mass (g)
Reaction 12		Acid 9	11000	252.14	1	43.6266			LiCl	42.39	3699.8	THF	109000	0.883	96247						0
		(S)-(-)-4-benzyl-2-oxazolidinone	8500	177.2	1.09952	47.9684			PivCl	120.58	13087.8										0
									NEt3	101.19	11499.2										0
		Total	19500	429.34		91.595		0			28286.8		109000		96247		0				0
										Yield (%)	92.9511
										AE (%)	95.8052						mass (g)	MW	mol
										RME (%)	85.5385					Product	16680	411.33	40.5514
										MI total (g g-1)	8.63512
										MI RRC (g g-1)	2.86492
										MI Solvents (g g-1)	5.7702		Conc (M)	0.400244
Simulation B: [Acid] = Literature data, 90% Yield
		METRICS
		Reactant (Limiting Reactant First)	Mass (g)	MW (g mol-1)	equiv	Mol	Catalyst	Mass (g)	Reagent	MW (g mol-1)	Mass (g)	Reaction Solvent	Volume (mL)	Density (g.mL-1)	Mass (g)	Work up Chemical	Mass (g)	Workup Solvent	Volume (mL)	Density (g mL-1)	Mass (g)
Reaction 11		Carboxylic acid	2320	116.16	1	19.9725			NEt3	101.19	4249.98	DCM	14000	1.33	18620						0
		(1S,2S)-(+)-Pseudoephedrine	3300	165.24	0.999925	19.971			PivCl	120.58	2411.6										0
		Total	5620	281.4		39.9434		0			6661.58		14000		18620		0				0
										Yield (%)	90
										AE (%)	93.5963						mass (g)	MW	mol
										RME (%)	84.2404					Product	4734.31	263.38	17.9752
										MI total (g g-1)	6.52716
										MI RRC (g g-1)	2.59416		Conc (M)	1.4266
										MI Solvents (g g-1)	3.93299
		METRICS
		Reactant (Limiting Reactant First)	Mass (g)	MW (g mol-1)	equiv	Mol	Catalyst	Mass (g)	Reagent	MW (g mol-1)	Mass (g)	Reaction Solvent	Volume (mL)	Density (g.mL-1)	Mass (g)	Work up Chemical	Mass (g)	Workup Solvent	Volume (mL)	Density (g mL-1)	Mass (g)
Reaction 12		Acid 9	11000	252.14	1	43.6266			LiCl	42.39	3699.8	THF	108381	0.883	95700.4						0
		(S)-(-)-4-benzyl-2-oxazolidinone	8500	177.2	1.09952	47.9684			PivCl	120.58	13087.8										0
									NEt3	101.19	11499.2										0
		Total	19500	429.34		91.595		0			28286.8		108381		95700.4		0				0
										Yield (%)	90
										AE (%)	95.8052						mass (g)	MW	mol
										RME (%)	82.8227					Product	16150.4	411.33	39.2639
										MI total (g g-1)	8.88443
										MI RRC (g g-1)	2.95886
										MI Solvents (g g-1)	5.92557		Conc (M)	0.40253
Simulation C: [Acid] = 0.4 M, 90% Yield
		METRICS
		Reactant (Limiting Reactant First)	Mass (g)	MW (g mol-1)	equiv	Mol	Catalyst	Mass (g)	Reagent	MW (g mol-1)	Mass (g)	Reaction Solvent	Volume (mL)	Density (g.mL-1)	Mass (g)	Work up Chemical	Mass (g)	Workup Solvent	Volume (mL)	Density (g mL-1)	Mass (g)
Reaction 11		Carboxylic acid	2320	116.16	1	19.9725			NEt3	101.19	4249.98	DCM	49900	1.33	66367						0
		(1S,2S)-(+)-Pseudoephedrine	3300	165.24	0.999925	19.971			PivCl	120.58	2411.6										0
		Total	5620	281.4		39.9434		0			6661.58		49900		66367		0				0
										Yield (%)	90
										AE (%)	93.5963						mass (g)	MW	mol
										RME (%)	84.2404					Product	4734.31	263.38	17.9752
										MI total (g g-1)	16.6125
										MI RRC (g g-1)	2.59416		Conc (M)	0.40025
										MI Solvents (g g-1)	14.0183
		METRICS
		Reactant (Limiting Reactant First)	Mass (g)	MW (g mol-1)	equiv	Mol	Catalyst	Mass (g)	Reagent	MW (g mol-1)	Mass (g)	Reaction Solvent	Volume (mL)	Density (g.mL-1)	Mass (g)	Work up Chemical	Mass (g)	Workup Solvent	Volume (mL)	Density (g mL-1)	Mass (g)
Reaction 12		Acid 9	11000	252.14	1	43.6266			LiCl	42.39	3699.8	THF	109000	0.883	96247						0
		(S)-(-)-4-benzyl-2-oxazolidinone	8500	177.2	1.09952	47.9684			PivCl	120.58	13087.8										0
									NEt3	101.19	11499.2										0
		Total	19500	429.34		91.595		0			28286.8		109000		96247		0				0
										Yield (%)	90
										AE (%)	95.8052						mass (g)	MW	mol
										RME (%)	82.8227					Product	16150.4	411.33	39.2639
										MI total (g g-1)	8.91827
										MI RRC (g g-1)	2.95886
										MI Solvents (g g-1)	5.95941		Conc (M)	0.400244
Simulation D: [Acid] = 0.4 M, 50% Yield
		METRICS
		Reactant (Limiting Reactant First)	Mass (g)	MW (g mol-1)	equiv	Mol	Catalyst	Mass (g)	Reagent	MW (g mol-1)	Mass (g)	Reaction Solvent	Volume (mL)	Density (g.mL-1)	Mass (g)	Work up Chemical	Mass (g)	Workup Solvent	Volume (mL)	Density (g mL-1)	Mass (g)
Reaction 11		Carboxylic acid	2320	116.16	1	19.9725			NEt3	101.19	4249.98	DCM	49900	1.33	66367						0
		(1S,2S)-(+)-Pseudoephedrine	3300	165.24	0.999925	19.971			PivCl	120.58	2411.6										0
		Total	5620	281.4		39.9434		0			6661.58		49900		66367		0				0
										Yield (%)	50
										AE (%)	93.5963						mass (g)	MW	mol
										RME (%)	46.8002					Product	2630.17	263.38	9.98623
										MI total (g g-1)	29.9024
										MI RRC (g g-1)	4.6695		Conc (M)	0.40025
										MI Solvents (g g-1)	25.2329
		METRICS
		Reactant (Limiting Reactant First)	Mass (g)	MW (g mol-1)	equiv	Mol	Catalyst	Mass (g)	Reagent	MW (g mol-1)	Mass (g)	Reaction Solvent	Volume (mL)	Density (g.mL-1)	Mass (g)	Work up Chemical	Mass (g)	Workup Solvent	Volume (mL)	Density (g mL-1)	Mass (g)
Reaction 12		Acid 9	11000	252.14	1	43.6266			LiCl	42.39	3699.8	THF	109000	0.883	96247						0
		(S)-(-)-4-benzyl-2-oxazolidinone	8500	177.2	1.09952	47.9684			PivCl	120.58	13087.8										0
									NEt3	101.19	11499.2										0
		Total	19500	429.34		91.595		0			28286.8		109000		96247		0				0
										Yield (%)	50
										AE (%)	95.8052						mass (g)	MW	mol
										RME (%)	46.0126					Product	8972.46	411.33	21.8133
										MI total (g g-1)	16.0529
										MI RRC (g g-1)	5.32594
										MI Solvents (g g-1)	10.7269		Conc (M)	0.400244
SUMMARY
			Literature data and simulation A-D with pivaloyl chloride as coupling reagent
			Entry	Substrate	AE	RME	PMI	PMIRRC	PMIsolv	Yield
					(%)	(%)	(g g-1)	(g g-1)	(g g-1)	(%)
			Literature data reported										Reaction 11	OPRD, 2009, 13, 463-467
				Reaction 11 1.4 M	93.5963	93.6004	5.87444	2.33475	3.53969	100
				Reaction 12 0.4 M	95.8052	85.5385	8.60235	2.86492	5.73744	92.9511
			Simulation A: [Acid] = 0.4 M, Literature data yield
				Reaction 11	93.5963	93.6004	14.9512	2.33475	12.6165	100
				Reaction 12	95.8052	85.5385	8.63512	2.86492	5.7702	92.9511
			Simulation B: [Acid] = Literature data, 90% Yield
				Reaction 11	93.5963	84.2404	6.52716	2.59416	3.93299	90
				Reaction 12	95.8052	82.8227	8.88443	2.95886	5.92557	90
			Simulation C: [Acid] = 0.4 M, 90% Yield
				Reaction 11	93.5963	84.2404	16.6125	2.59416	14.0183	90
				Reaction 12	95.8052	82.8227	8.91827	2.95886	5.95941	90
			Simulation D: [Acid] = 0.4 M, 50% Yield
				Reaction 11	93.5963	46.8002	29.9024	4.6695	25.2329	50			Reaction 12	OPRD, 2009, 13, 1161-1168
				Reaction 12	95.8052	46.0126	16.0529	5.32594	10.7269	50

## Sheet: ICBF
Literature data reported
													A clean, dry 200 L glass lined steel reactor, capable of maintaining a reaction at 15 8C, was dried under heat and vacuum. The reactor was charged with acid 20 (15.7 kg, 20.6 mol, 1.0 equiv) and THF (110 L,H2O=45 ppm (KF)). The mixture was agitated until a solution was formed, then the jacket was adjusted so that the internal emperature was approximately 158C. N-methylmorpholine (2.31 kg, 22.9 mo…
		Reaction 13
		Asian J. Org. Chem. 2012, 1, 80-89
				20
		METRICS
		Reactant (Limiting Reactant First)	Mass (g)	MW (g mol-1)	equiv	Mol	Catalyst	Mass (g)	Reagent	MW (g mol-1)	Mass (g)	Reaction Solvent	Volume (mL)	Density (g.mL-1)	Mass (g)	Work up Chemical	Mass (g)	Workup Solvent	Volume (mL)	Density (g mL-1)	Mass (g)
Reaction 13		Carboxylic acid	15700	774.73	1	20.2651			NMM	101.15	4612.44	THF	110000	0.883	97130						0
		Aminocyclopropane salt	7120	313.37	1.12117	22.7207			IBCF	136.58	3127.68										0
		Total	22820	1088.1		42.9859		0			7740.12		110000		97130		0				0
										Yield (%)	84.3059
										AE (%)	82.5182						mass (g)	MW	mol
										RME (%)	67.2217					Product	15340	897.88	17.0847
										MI total (g g-1)	8.324
										MI RRC (g g-1)	1.99219		Conc (M)	0.184228
										MI Solvents (g g-1)	6.33181
Simulation A: [Acid] = 0.4 M, Literature data yield
		METRICS
		Reactant (Limiting Reactant First)	Mass (g)	MW (g mol-1)	equiv	Mol	Catalyst	Mass (g)	Reagent	MW (g mol-1)	Mass (g)	Reaction Solvent	Volume (mL)	Density (g.mL-1)	Mass (g)	Work up Chemical	Mass (g)	Workup Solvent	Volume (mL)	Density (g mL-1)	Mass (g)
Reaction 13		Carboxylic acid	15700	774.73	1	20.2651			NMM	101.15	4612.44	THF	50600	0.883	44679.8						0
		Aminocyclopropane salt	7120	313.37	1.12117	22.7207			IBCF	136.58	3127.68				0						0
		Total	22820	1088.1		42.9859		0			7740.12		50600		44679.8		0				0
										Yield (%)	84.3059
										AE (%)	82.5182						mass (g)	MW	mol
										RME (%)	67.2217					Product	15340	897.88	17.0847
										MI total (g g-1)	4.90482
										MI RRC (g g-1)	1.99219		Conc (M)	0.400497
										MI Solvents (g g-1)	2.91263
		METRICS
Simulation B: [Acid] = Literature data, 90% Yield
		METRICS
		Reactant (Limiting Reactant First)	Mass (g)	MW (g mol-1)	equiv	Mol	Catalyst	Mass (g)	Reagent	MW (g mol-1)	Mass (g)	Reaction Solvent	Volume (mL)	Density (g.mL-1)	Mass (g)	Work up Chemical	Mass (g)	Workup Solvent	Volume (mL)	Density (g mL-1)	Mass (g)
Reaction 13		Carboxylic acid	15700	774.73	1	20.2651			NMM	101.15	4612.44	THF	110000	0.883	97130						0
		Aminocyclopropane salt	7120	313.37	1.12117	22.7207			IBCF	136.58	3127.68				0						0
		Total	22820	1088.1		42.9859		0			7740.12		110000		97130		0				0
										Yield (%)	90
										AE (%)	82.5182						mass (g)	MW	mol
										RME (%)	71.762					Product	16376.1	897.88	18.2386
										MI total (g g-1)	7.79735
										MI RRC (g g-1)	1.86614		Conc (M)	0.184228
										MI Solvents (g g-1)	5.93121
		METRICS
Simulation C: [Acid] = 0.4 M, 90% Yield
		METRICS
		Reactant (Limiting Reactant First)	Mass (g)	MW (g mol-1)	equiv	Mol	Catalyst	Mass (g)	Reagent	MW (g mol-1)	Mass (g)	Reaction Solvent	Volume (mL)	Density (g.mL-1)	Mass (g)	Work up Chemical	Mass (g)	Workup Solvent	Volume (mL)	Density (g mL-1)	Mass (g)
Reaction 13		Carboxylic acid	15700	774.73	1	20.2651			NMM	101.15	4612.44	THF	50600	0.883	44679.8						0
		Aminocyclopropane salt	7120	313.37	1.12117	22.7207			IBCF	136.58	3127.68				0						0
		Total	22820	1088.1		42.9859		0			7740.12		50600		44679.8		0				0
										Yield (%)	90
										AE (%)	82.5182						mass (g)	MW	mol
										RME (%)	71.762					Product	16376.1	897.88	18.2386
										MI total (g g-1)	4.5945
										MI RRC (g g-1)	1.86614		Conc (M)	0.400497
										MI Solvents (g g-1)	2.72836
Simulation D: [Acid] = 0.4 M, 50% Yield
		METRICS
		Reactant (Limiting Reactant First)	Mass (g)	MW (g mol-1)	equiv	Mol	Catalyst	Mass (g)	Reagent	MW (g mol-1)	Mass (g)	Reaction Solvent	Volume (mL)	Density (g.mL-1)	Mass (g)	Work up Chemical	Mass (g)	Workup Solvent	Volume (mL)	Density (g mL-1)	Mass (g)
Reaction 13		Carboxylic acid	15700	774.73	1	20.2651			NMM	101.15	4612.44	THF	50600	0.883	44679.8						0
		Aminocyclopropane salt	7120	313.37	1.12117	22.7207			IBCF	136.58	3127.68				0						0
		Total	22820	1088.1		42.9859		0			7740.12		50600		44679.8		0				0
										Yield (%)	50
										AE (%)	82.5182						mass (g)	MW	mol
										RME (%)	39.8678					Product	9097.83	897.88	10.1326
										MI total (g g-1)	8.2701
										MI RRC (g g-1)	3.35906		Conc (M)	0.400497
										MI Solvents (g g-1)	4.91104
SUMMARY
			Literature data and simulation A-D with pivaloyl chloride as coupling reagent
			Entry	Substrate	AE	RME	PMI	PMIRRC	PMIsolv	Yield
					(%)	(%)	(g g-1)	(g g-1)	(g g-1)	(%)
			Literature data reported										Reaction 13	Asian J. Org. Chem. 2012, 1, 80-89
				Scheme 28 0.2 M	82.5182	67.2217	8.324	1.99219	6.33181	84.3059
			Simulation A: [Acid] = 0.4 M, Literature data yield
				Reaction 13	82.5182	67.2217	4.90482	1.99219	2.91263	84.3059
			Simulation B: [Acid] = Literature data, 90% Yield
				Reaction 13	82.5182	71.762	7.79735	1.86614	5.93121	90
			Simulation C: [Acid] = 0.4 M, 90% Yield
				Reaction 13	82.5182	71.762	4.5945	1.86614	2.72836	90
			Simulation D: [Acid] = 0.4 M, 50% Yield
				Reaction 13	82.5182	39.8678	8.2701	3.35906	4.91104	50

## Sheet: T3P
Literature data reported
		Reaction 14									(S)-Benzyl 6-(3-cyclopentyl-2-(4-(trifluoromethyl)-1H-imidazol- 1-yl)propanamido)nicotinate (11). A stirred mixture of acid 2 (22.00 kg, 79.64 mol), amine 3 (20.00 kg, 87.62 mol, 1.1 equiv), pyridine (22 L, 270 mol, 1.0 vol), MeCN (110 L), and EtOAc (57 L) was charged with T3P solution (50 wt% MeCN, 101 kg, 104 L, 159 mol, 2.0 equiv) at −5 °C. The resulting homogeneous solution was held at 0 °C f…
		OPRD, 2012, 16, 1635-1645
		METRICS
		Reactant (Limiting Reactant First)	Mass (g)	MW (g mol-1)	equiv	Mol	Catalyst	Mass (g)	Reagent	MW (g mol-1)	Mass (g)	Reaction Solvent	Volume (mL)	Density (g.mL-1)	Mass (g)	Work up Chemical	Mass (g)	Workup Solvent	Volume (mL)	Density (g mL-1)	Mass (g)
Reaction 14		Carboxylic acid	22000	276.26	1	79.6351			Pyridine	79.1	21357	EtOAc	57000	0.895	51015						0
		Amine	20000	228.25	1.10031	87.6232			T3P	318.18	50590.6	MeCN	214000	0.786	168204						0
		Total	42000	504.51		167.258		0			71947.6		271000		219219		0				0
										Yield (%)	87.9654
										AE (%)	96.4302						mass (g)	MW	mol
										RME (%)	81.1429					Product	34080	486.5	70.0514
										MI total (g g-1)	9.77602
										MI RRC (g g-1)	3.34353		Conc (M)	0.293857
										MI Solvents (g g-1)	6.43248
Simulation A: [Acid] = 0.4 M, Literature data yield
		METRICS
		Reactant (Limiting Reactant First)	Mass (g)	MW (g mmol-1)	equiv	Mol	Catalyst	Mass (g)	Reagent	MW (g mmol-1)	Mass (g)	Reaction Solvent	Volume (mL)	Density (g.mL-1)	Mass (g)	Work up Chemical	Mass (g)	Workup Solvent	Volume (mL)	Density (g mL-1)	Mass (g)
Reaction 14		Carboxylic acid	22000	276.26	1	79.6351			Pyridine	79.1	21357	EtOAc	41856.1	0.895	37461.2						0
		Amine	20000	228.25	1.10031	87.6232			T3P	318.18	50590.6	MeCN	157144	0.786	123515						0
		Total	42000	504.51		167.258		0			71947.6		199000		160976		0				0
										Yield (%)	87.9654
										AE (%)	96.4302						mass (g)	MW	mol
										RME (%)	81.1429					Product	34080	486.5	70.0514
										MI total (g g-1)	8.06702
										MI RRC (g g-1)	3.34353		Conc (M)	0.400177
										MI Solvents (g g-1)	4.72348
Simulation B: [Acid] = Literature data, 90% Yield
		METRICS
		Reactant (Limiting Reactant First)	Mass (g)	MW (g mmol-1)	equiv	Mol	Catalyst	Mass (g)	Reagent	MW (g mmol-1)	Mass (g)	Reaction Solvent	Volume (mL)	Density (g.mL-1)	Mass (g)	Work up Chemical	Mass (g)	Workup Solvent	Volume (mL)	Density (g mL-1)	Mass (g)
Reaction 14		Carboxylic acid	22000	276.26	1	79.6351			Pyridine	79.1	21357	EtOAc	57000	0.895	51015						0
		Amine	20000	228.25	1.10031	87.6232			T3P	318.18	50590.6	MeCN	214000	0.786	168204						0
		Total	42000	504.51		167.258		0			71947.6		271000		219219		0				0
										Yield (%)	90
										AE (%)	96.4302						mass (g)	MW	mol
										RME (%)	83.0196					Product	34868.2	486.5	71.6716
										MI total (g g-1)	9.55502
										MI RRC (g g-1)	3.26795		Conc (M)	0.293857
										MI Solvents (g g-1)	6.28707
Simulation C: [Acid] = 0.4 M, 90% Yield
		METRICS
		Reactant (Limiting Reactant First)	Mass (g)	MW (g mmol-1)	equiv	Mol	Catalyst	Mass (g)	Reagent	MW (g mmol-1)	Mass (g)	Reaction Solvent	Volume (mL)	Density (g.mL-1)	Mass (g)	Work up Chemical	Mass (g)	Workup Solvent	Volume (mL)	Density (g mL-1)	Mass (g)
Reaction 14		Carboxylic acid	22000	276.26	1	79.6351			Pyridine	79.1	21357	EtOAc	41856.1	0.895	37461.2						0
		Amine	20000	228.25	1.10031	87.6232			T3P	318.18	50590.6	MeCN	157144	0.786	123515						0
		Total	42000	504.51		167.258		0			71947.6		199000		160976		0				0
										Yield (%)	90
										AE (%)	96.4302						mass (g)	MW	mol
										RME (%)	83.0196					Product	34868.2	486.5	71.6716
										MI total (g g-1)	7.88465
										MI RRC (g g-1)	3.26795		Conc (M)	0.400177
										MI Solvents (g g-1)	4.6167
Simulation D: [Acid] = 0.4 M, 50% Yield
		METRICS
		Reactant (Limiting Reactant First)	Mass (g)	MW (g mmol-1)	equiv	Mol	Catalyst	Mass (g)	Reagent	MW (g mmol-1)	Mass (g)	Reaction Solvent	Volume (mL)	Density (g.mL-1)	Mass (g)	Work up Chemical	Mass (g)	Workup Solvent	Volume (mL)	Density (g mL-1)	Mass (g)
Reaction 14		Carboxylic acid	22000	276.26	1	79.6351			Pyridine	79.1	21357	EtOAc	41856.1	0.895	37461.2						0
		Amine	20000	228.25	1.10031	87.6232			T3P	318.18	50590.6	MeCN	157144	0.786	123515						0
		Total	42000	504.51		167.258		0			71947.6		199000		160976		0				0
										Yield (%)	50
										AE (%)	96.4302						mass (g)	MW	mol
										RME (%)	46.122					Product	19371.2	486.5	39.8176
										MI total (g g-1)	14.1924
										MI RRC (g g-1)	5.88231		Conc (M)	0.400177
										MI Solvents (g g-1)	8.31007
SUMMARY
			Literature data and simulation A-D with propylphosphonic anhydride as coupling reagent
			Entry	Substrate	AE	RME	PMI	PMIRRC	PMIsolv	Yield
					(%)	(%)	(g g-1)	(g g-1)	(g g-1)	(%)
			Literature data reported										Reaction 14	OPRD, 2012, 16, 1635-1645
				Reaction 14 0.3 M	96.4302	81.1429	9.77602	3.34353	6.43248	87.9654
			Simulation A: [Acid] = 0.4 M, Literature data yield
				Reaction 14	96.4302	81.1429	8.06702	3.34353	4.72348	87.9654
			Simulation B: [Acid] = Literature data, 90% Yield
				Reaction 14	96.4302	83.0196	9.55502	3.26795	6.28707	90
			Simulation C: [Acid] = 0.4 M, 90% Yield
				Reaction 14	96.4302	83.0196	7.88465	3.26795	4.6167	90
			Simulation D: [Acid] = 0.4 M, 50% Yield
				Reaction 14	96.4302	46.122	14.1924	5.88231	8.31007	50

## Sheet: Example 5 vs 13
Literature data reported
		METRICS
		Reactant (Limiting Reactant First)	Mass (g)	MW (g mol-1)	equiv	Mol	Catalyst	Mass (g)	Reagent	MW (g mol-1)	Mass (g)	Reaction Solvent	Volume (mL)	Density (g.mL-1)	Mass (g)	Work up Chemical	Mass (g)	Workup Solvent	Volume (mL)	Density (g mL-1)	Mass (g)
Reaction 5		3,4,5-Trimethoxybenzoic acid	63000	212.2	1	296.89			CDI	162.15	60650	EtOAc	378000	0.895	338310						0
CDI 1		Dimethylaminoethoxybenzylamine	63420	194.28	1.14	326.436			K2CO3	138.21	41000	EtOAc	378000	0.895	338310						0
		Total	126420	406.48		623.326		0			101650		756000		676620		0				0
										Yield (%)	89.3091
										AE (%)	95.5668						mass (g)	MW	mol
										RME (%)	81.4745					Product	103000	388.46	265.15
										MI total (g g-1)	8.7834
										MI RRC (g g-1)	2.21427		Conc (M)	0.392711
										MI Solvents (g g-1)	6.56913
		METRICS
		Reactant (Limiting Reactant First)	Mass (g)	MW (g mol-1)	equiv	Mol	Catalyst	Mass (g)	Reagent	MW (g mol-1)	Mass (g)	Reaction Solvent	Volume (mL)	Density (g.mL-1)	Mass (g)	Work up Chemical	Mass (g)	Workup Solvent	Volume (mL)	Density (g mL-1)	Mass (g)
Reaction 13		Carboxylic acid	15700	774.73	1	20.2651			NMM	101.15	4612.44	THF	110000	0.883	97130						0
ICBF 1		Aminocyclopropane salt	7120	313.37	1.12117	22.7207			IBCF	136.58	3127.68										0
		Total	22820	1088.1		42.9859		0			7740.12		110000		97130		0				0
										Yield (%)	84.3059
										AE (%)	82.5182						mass (g)	MW	mol
										RME (%)	67.2217					Product	15340	897.88	17.0847
										MI total (g g-1)	8.324
										MI RRC (g g-1)	1.99219		Conc (M)	0.184228
										MI Solvents (g g-1)	6.33181
Simulation A: [Acid] = 0.4 M, Literature data yield
		METRICS
		Reactant (Limiting Reactant First)	Mass (g)	MW (g mol-1)	equiv	Mol	Catalyst	Mass (g)	Reagent	MW (g mol-1)	Mass (g)	Reaction Solvent	Volume (mL)	Density (g.mL-1)	Mass (g)	Work up Chemical	Mass (g)	Workup Solvent	Volume (mL)	Density (g mL-1)	Mass (g)
Reaction 5		3,4,5-Trimethoxybenzoic acid	63000	212.2	1	296.89			CDI	162.15	60650	EtOAc	371112	0.895	332145						0
CDI 1		Dimethylaminoethoxybenzylamine	63420	194.28	1.14	326.436			K2CO3	138.21	41000	EtOAc	371112	0.895	332145						0
		Total	126420	406.48		623.326		0			101650		742224		664290		0				0
										Yield (%)	89.3091
										AE (%)	95.5668						mass (g)	MW	mol
										RME (%)	81.4745					Product	103000	388.46	265.15
										MI total (g g-1)	8.66369
										MI RRC (g g-1)	2.21427		Conc (M)	0.4
										MI Solvents (g g-1)	6.44942
		METRICS
		Reactant (Limiting Reactant First)	Mass (g)	MW (g mol-1)	equiv	Mol	Catalyst	Mass (g)	Reagent	MW (g mol-1)	Mass (g)	Reaction Solvent	Volume (mL)	Density (g.mL-1)	Mass (g)	Work up Chemical	Mass (g)	Workup Solvent	Volume (mL)	Density (g mL-1)	Mass (g)
Reaction 13		Carboxylic acid	15700	774.73	1	20.2651			NMM	101.15	4612.44	THF	50600	0.883	44679.8						0
ICBF 1		Aminocyclopropane salt	7120	313.37	1.12117	22.7207			IBCF	136.58	3127.68				0						0
		Total	22820	1088.1		42.9859		0			7740.12		50600		44679.8		0				0
										Yield (%)	84.3059
										AE (%)	82.5182						mass (g)	MW	mol
										RME (%)	67.2217					Product	15340	897.88	17.0847
										MI total (g g-1)	4.90482
										MI RRC (g g-1)	1.99219		Conc (M)	0.400497
										MI Solvents (g g-1)	2.91263
Simulation B: [Acid] = Literature data, Yield = 90%
		METRICS
		Reactant (Limiting Reactant First)	Mass (g)	MW (g mol-1)	equiv	Mol	Catalyst	Mass (g)	Reagent	MW (g mol-1)	Mass (g)	Reaction Solvent	Volume (mL)	Density (g.mL-1)	Mass (g)	Work up Chemical	Mass (g)	Workup Solvent	Volume (mL)	Density (g mL-1)	Mass (g)
Reaction 5		3,4,5-Trimethoxybenzoic acid	63000	212.2	1	296.89			CDI	162.15	60650	EtOAc	371112	0.895	332145						0
CDI 1		Dimethylaminoethoxybenzylamine	63420	194.28	1.14	326.436			K2CO3	138.21	41000	EtOAc	371112	0.895	332145						0
		Total	126420	406.48		623.326		0			101650		742224		664290		0				0
										Yield (%)	90
										AE (%)	95.5668						mass (g)	MW	mol
										RME (%)	82.1047					Product	103797	388.46	267.201
										MI total (g g-1)	8.59719
										MI RRC (g g-1)	2.19727		Conc (M)	0.4
										MI Solvents (g g-1)	6.39991
		METRICS
		Reactant (Limiting Reactant First)	Mass (g)	MW (g mol-1)	equiv	Mol	Catalyst	Mass (g)	Reagent	MW (g mol-1)	Mass (g)	Reaction Solvent	Volume (mL)	Density (g.mL-1)	Mass (g)	Work up Chemical	Mass (g)	Workup Solvent	Volume (mL)	Density (g mL-1)	Mass (g)
Reaction 13		Carboxylic acid	15700	774.73	1	20.2651			NMM	101.15	4612.44	THF	110000	0.883	97130						0
ICBF 1		Aminocyclopropane salt	7120	313.37	1.12117	22.7207			IBCF	136.58	3127.68										0
		Total	22820	1088.1		42.9859		0			7740.12		110000		97130		0				0
										Yield (%)	90
										AE (%)	82.5182						mass (g)	MW	mol
										RME (%)	71.762					Product	16376.1	897.88	18.2386
										MI total (g g-1)	7.79735
										MI RRC (g g-1)	1.86614		Conc (M)	0.184228
										MI Solvents (g g-1)	5.93121
Simulation C: [Acid] =0.4 M, Yield = 90%
		METRICS
		Reactant (Limiting Reactant First)	Mass (g)	MW (g mol-1)	equiv	Mol	Catalyst	Mass (g)	Reagent	MW (g mol-1)	Mass (g)	Reaction Solvent	Volume (mL)	Density (g.mL-1)	Mass (g)	Work up Chemical	Mass (g)	Workup Solvent	Volume (mL)	Density (g mL-1)	Mass (g)
Reaction 5		3,4,5-Trimethoxybenzoic acid	63000	212.2	1	296.89			CDI	162.15	60650	EtOAc	371112	0.895	332145						0
CDI 1		Dimethylaminoethoxybenzylamine	63420	194.28	1.14	326.436			K2CO3	138.21	41000	EtOAc	371112	0.895	332145						0
		Total	126420	406.48		623.326		0			101650		742224		664290		0				0
										Yield (%)	90
										AE (%)	95.5668						mass (g)	MW	mol
										RME (%)	82.1047					Product	103797	388.46	267.201
										MI total (g g-1)	8.59719
										MI RRC (g g-1)	2.19727		Conc (M)	0.4
										MI Solvents (g g-1)	6.39991
		METRICS
		Reactant (Limiting Reactant First)	Mass (g)	MW (g mol-1)	equiv	Mol	Catalyst	Mass (g)	Reagent	MW (g mol-1)	Mass (g)	Reaction Solvent	Volume (mL)	Density (g.mL-1)	Mass (g)	Work up Chemical	Mass (g)	Workup Solvent	Volume (mL)	Density (g mL-1)	Mass (g)
Reaction 13		Carboxylic acid	15700	774.73	1	20.2651			NMM	101.15	4612.44	THF	50600	0.883	44679.8						0
ICBF 1		Aminocyclopropane salt	7120	313.37	1.12117	22.7207			IBCF	136.58	3127.68										0
		Total	22820	1088.1		42.9859		0			7740.12		50600		44679.8		0				0
										Yield (%)	90
										AE (%)	82.5182						mass (g)	MW	mol
										RME (%)	71.762					Product	16376.1	897.88	18.2386
										MI total (g g-1)	4.5945
										MI RRC (g g-1)	1.86614		Conc (M)	0.400497
										MI Solvents (g g-1)	2.72836
Simulation D: [Acid] =0.4 M, Yield = 50%
		METRICS
		Reactant (Limiting Reactant First)	Mass (g)	MW (g mol-1)	equiv	Mol	Catalyst	Mass (g)	Reagent	MW (g mol-1)	Mass (g)	Reaction Solvent	Volume (mL)	Density (g.mL-1)	Mass (g)	Work up Chemical	Mass (g)	Workup Solvent	Volume (mL)	Density (g mL-1)	Mass (g)
Reaction 5		3,4,5-Trimethoxybenzoic acid	63000	212.2	1	296.89			CDI	162.15	60650	EtOAc	371112	0.895	332145						0
CDI 1		Dimethylaminoethoxybenzylamine	63420	194.28	1.14	326.436			K2CO3	138.21	41000	EtOAc	371112	0.895	332145						0
		Total	126420	406.48		623.326		0			101650		742224		664290		0				0
										Yield (%)	50
										AE (%)	95.5668						mass (g)	MW	mol
										RME (%)	45.6137					Product	57664.9	388.46	148.445
										MI total (g g-1)	15.4749
										MI RRC (g g-1)	3.95509		Conc (M)	0.4
										MI Solvents (g g-1)	11.5198
		METRICS
		Reactant (Limiting Reactant First)	Mass (g)	MW (g mol-1)	equiv	Mol	Catalyst	Mass (g)	Reagent	MW (g mol-1)	Mass (g)	Reaction Solvent	Volume (mL)	Density (g.mL-1)	Mass (g)	Work up Chemical	Mass (g)	Workup Solvent	Volume (mL)	Density (g mL-1)	Mass (g)
Reaction 13		Carboxylic acid	15700	774.73	1	20.2651			NMM	101.15	4612.44	THF	50600	0.883	44679.8						0
ICBF 1		Aminocyclopropane salt	7120	313.37	1.12117	22.7207			IBCF	136.58	3127.68										0
		Total	22820	1088.1		42.9859		0			7740.12		50600		44679.8		0				0
										Yield (%)	50
										AE (%)	82.5182						mass (g)	MW	mol
										RME (%)	39.8678					Product	9097.83	897.88	10.1326
										MI total (g g-1)	8.2701
										MI RRC (g g-1)	3.35906		Conc (M)	0.400497
										MI Solvents (g g-1)	4.91104
Simulation E: [Acid] =0.8 M, Yield = 90%
		METRICS
		Reactant (Limiting Reactant First)	Mass (g)	MW (g mol-1)	equiv	Mol	Catalyst	Mass (g)	Reagent	MW (g mol-1)	Mass (g)	Reaction Solvent	Volume (mL)	Density (g.mL-1)	Mass (g)	Work up Chemical	Mass (g)	Workup Solvent	Volume (mL)	Density (g mL-1)	Mass (g)
Reaction 5		3,4,5-Trimethoxybenzoic acid	63000	212.2	1	296.89			CDI	162.15	60650	EtOAc	371112	0.895	332145						0
CDI 1		Dimethylaminoethoxybenzylamine	63420	194.28	1.14	326.436			K2CO3	138.21	41000										0
		Total	126420	406.48		623.326		0			101650		371112		332145		0				0
										Yield (%)	90
										AE (%)	95.5668						mass (g)	MW	mol
										RME (%)	82.1047					Product	103797	388.46	267.201
										MI total (g g-1)	5.39723
										MI RRC (g g-1)	2.19727		Conc (M)	0.8
										MI Solvents (g g-1)	3.19996
		METRICS
		Reactant (Limiting Reactant First)	Mass (g)	MW (g mol-1)	equiv	Mol	Catalyst	Mass (g)	Reagent	MW (g mol-1)	Mass (g)	Reaction Solvent	Volume (mL)	Density (g.mL-1)	Mass (g)	Work up Chemical	Mass (g)	Workup Solvent	Volume (mL)	Density (g mL-1)	Mass (g)
Reaction 13		Carboxylic acid	15700	774.73	1	20.2651			NMM	101.15	4612.44	THF	25300	0.883	22339.9						0
ICBF 1		Aminocyclopropane salt	7120	313.37	1.12117	22.7207			IBCF	136.58	3127.68										0
		Total	22820	1088.1		42.9859		0			7740.12		25300		22339.9		0				0
										Yield (%)	90
										AE (%)	82.5182						mass (g)	MW	mol
										RME (%)	71.762					Product	16376.1	897.88	18.2386
										MI total (g g-1)	3.23032
										MI RRC (g g-1)	1.86614		Conc (M)	0.800993
										MI Solvents (g g-1)	1.36418
Simulation F: Both CDI (1.1eq) as coupling reagent, [Acid] = 0.4M in THF, Yield = 90%
		METRICS
		Reactant (Limiting Reactant First)	Mass (g)	MW (g mol-1)	equiv	Mol	Catalyst	Mass (g)	Reagent	MW (g mol-1)	Mass (g)	Reaction Solvent	Volume (mL)	Density (g.mL-1)	Mass (g)	Work up Chemical	Mass (g)	Workup Solvent	Volume (mL)	Density (g mL-1)	Mass (g)
Reaction 5		3,4,5-Trimethoxybenzoic acid	63000	212.2	1	296.89			CDI	162.15	52931.6	EtOAc	371112	0.895	332145						0
CDI 1		Dimethylaminoethoxybenzylamine	63420	194.28	1.14	326.436			K2CO3	138.21	45116.7	EtOAc	371112	0.895	332145						0
		Total	126420	406.48		623.326		0			98048.3		742224		664290		0				0
										Yield (%)	90
										AE (%)	95.5668						mass (g)	MW	mol
										RME (%)	82.1047					Product	103797	388.46	267.201
										MI total (g g-1)	8.56249
										MI RRC (g g-1)	2.16257		Conc (M)	0.4
										MI Solvents (g g-1)	6.39991
		METRICS
		Reactant (Limiting Reactant First)	Mass (g)	MW (g mol-1)	equiv	Mol	Catalyst	Mass (g)	Reagent	MW (g mol-1)	Mass (g)	Reaction Solvent	Volume (mL)	Density (g.mL-1)	Mass (g)	Work up Chemical	Mass (g)	Workup Solvent	Volume (mL)	Density (g mL-1)	Mass (g)
Reaction 13		Carboxylic acid	15700	774.73	1	20.2651			CDI	162.15	3684.17	THF	50600	0.883	44679.8						0
ICBF 1		Aminocyclopropane salt	7120	313.37	1.12117	22.7207			K2CO3	138.21	3140.23										0
		Total	22820	1088.1		42.9859		0			6824.4		50600		44679.8		0				0
										Yield (%)	90
										AE (%)	82.5182						mass (g)	MW	mol
										RME (%)	71.762					Product	16376.1	897.88	18.2386
										MI total (g g-1)	4.53858
										MI RRC (g g-1)	1.81023		Conc (M)	0.400497
										MI Solvents (g g-1)	2.72836
Simulation G: Both CDI (1.1eq) as coupling reagent, [Acid] = 0.4M in THF, Yield = 50%
		METRICS
		Reactant (Limiting Reactant First)	Mass (g)	MW (g mol-1)	equiv	Mol	Catalyst	Mass (g)	Reagent	MW (g mol-1)	Mass (g)	Reaction Solvent	Volume (mL)	Density (g.mL-1)	Mass (g)	Work up Chemical	Mass (g)	Workup Solvent	Volume (mL)	Density (g mL-1)	Mass (g)
Reaction 5		3,4,5-Trimethoxybenzoic acid	63000	212.2	1	296.89			CDI	162.15	52931.6	EtOAc	371112	0.895	332145						0
CDI 1		Dimethylaminoethoxybenzylamine	63420	194.28	1.14	326.436			K2CO3	138.21	45116.7	EtOAc	371112	0.895	332145						0
		Total	126420	406.48		623.326		0			98048.3		742224		664290		0				0
										Yield (%)	50
										AE (%)	95.5668						mass (g)	MW	mol
										RME (%)	45.6137					Product	57664.9	388.46	148.445
										MI total (g g-1)	15.4125
										MI RRC (g g-1)	3.89263		Conc (M)	0.4
										MI Solvents (g g-1)	11.5198
		METRICS
		Reactant (Limiting Reactant First)	Mass (g)	MW (g mol-1)	equiv	Mol	Catalyst	Mass (g)	Reagent	MW (g mol-1)	Mass (g)	Reaction Solvent	Volume (mL)	Density (g.mL-1)	Mass (g)	Work up Chemical	Mass (g)	Workup Solvent	Volume (mL)	Density (g mL-1)	Mass (g)
Reaction 13		Carboxylic acid	15700	774.73	1	20.2651			CDI	162.15	3684.17	THF	50600	0.883	44679.8						0
ICBF 1		Aminocyclopropane salt	7120	313.37	1.12117	22.7207			K2CO3	138.21	3140.23										0
		Total	22820	1088.1		42.9859		0			6824.4		50600		44679.8		0				0
										Yield (%)	50
										AE (%)	82.5182						mass (g)	MW	mol
										RME (%)	39.8678					Product	9097.83	897.88	10.1326
										MI total (g g-1)	8.16945
										MI RRC (g g-1)	3.25841		Conc (M)	0.400497
										MI Solvents (g g-1)	4.91104
Simulation H: Both ICBF (1.1eq) as coupling reagent, [Acid] = 0.4M in THF, Yield = 90%
		METRICS
		Reactant (Limiting Reactant First)	Mass (g)	MW (g mol-1)	equiv	Mol	Catalyst	Mass (g)	Reagent	MW (g mol-1)	Mass (g)	Reaction Solvent	Volume (mL)	Density (g.mL-1)	Mass (g)	Work up Chemical	Mass (g)	Workup Solvent	Volume (mL)	Density (g mL-1)	Mass (g)
Reaction 5		3,4,5-Trimethoxybenzoic acid	63000	212.2	1	296.89			NMM	101.15	33019	EtOAc	371112	0.895	332145						0
CDI 1		Dimethylaminoethoxybenzylamine	63420	194.28	1.14	326.436			IBCF	136.58	44584.6	EtOAc	371112	0.895	332145						0
		Total	126420	406.48		623.326		0			77603.6		742224		664290		0				0
										Yield (%)	90
										AE (%)	95.5668						mass (g)	MW	mol
										RME (%)	82.1047					Product	103797	388.46	267.201
										MI total (g g-1)	8.36552
										MI RRC (g g-1)	1.96561		Conc (M)	0.4
										MI Solvents (g g-1)	6.39991
		METRICS
		Reactant (Limiting Reactant First)	Mass (g)	MW (g mol-1)	equiv	Mol	Catalyst	Mass (g)	Reagent	MW (g mol-1)	Mass (g)	Reaction Solvent	Volume (mL)	Density (g.mL-1)	Mass (g)	Work up Chemical	Mass (g)	Workup Solvent	Volume (mL)	Density (g mL-1)	Mass (g)
Reaction 13		Carboxylic acid	15700	774.73	1	20.2651			NMM	101.15	2298.2	THF	50600	0.883	44679.8						0
ICBF 1		Aminocyclopropane salt	7120	313.37	1.12117	22.7207			IBCF	136.58	3103.2										0
		Total	22820	1088.1		42.9859		0			5401.4		50600		44679.8		0				0
										Yield (%)	90
										AE (%)	82.5182						mass (g)	MW	mol
										RME (%)	71.762					Product	16376.1	897.88	18.2386
										MI total (g g-1)	4.45169
										MI RRC (g g-1)	1.72333		Conc (M)	0.400497
										MI Solvents (g g-1)	2.72836
Simulation I: Both ICBF (1.1eq) as coupling reagent, [Acid] = 0.4M in THF, Yield = 50%
		METRICS
		Reactant (Limiting Reactant First)	Mass (g)	MW (g mol-1)	equiv	Mol	Catalyst	Mass (g)	Reagent	MW (g mol-1)	Mass (g)	Reaction Solvent	Volume (mL)	Density (g.mL-1)	Mass (g)	Work up Chemical	Mass (g)	Workup Solvent	Volume (mL)	Density (g mL-1)	Mass (g)
Reaction 5		3,4,5-Trimethoxybenzoic acid	63000	212.2	1	296.89			NMM	101.15	33019	EtOAc	371112	0.895	332145						0
CDI 1		Dimethylaminoethoxybenzylamine	63420	194.28	1.14	326.436			IBCF	136.58	44584.6	EtOAc	371112	0.895	332145						0
		Total	126420	406.48		623.326		0			77603.6		742224		664290		0				0
										Yield (%)	50
										AE (%)	95.5668						mass (g)	MW	mol
										RME (%)	45.6137					Product	57664.9	388.46	148.445
										MI total (g g-1)	15.0579
										MI RRC (g g-1)	3.53809		Conc (M)	0.4
										MI Solvents (g g-1)	11.5198
		METRICS
		Reactant (Limiting Reactant First)	Mass (g)	MW (g mol-1)	equiv	Mol	Catalyst	Mass (g)	Reagent	MW (g mol-1)	Mass (g)	Reaction Solvent	Volume (mL)	Density (g.mL-1)	Mass (g)	Work up Chemical	Mass (g)	Workup Solvent	Volume (mL)	Density (g mL-1)	Mass (g)
Reaction 13		Carboxylic acid	15700	774.73	1	20.2651			NMM	101.15	2298.2	THF	50600	0.883	44679.8						0
ICBF 1		Aminocyclopropane salt	7120	313.37	1.12117	22.7207			IBCF	136.58	3103.2										0
		Total	22820	1088.1		42.9859		0			5401.4		50600		44679.8		0				0
										Yield (%)	50
										AE (%)	82.5182						mass (g)	MW	mol
										RME (%)	39.8678					Product	9097.83	897.88	10.1326
										MI total (g g-1)	8.01304
										MI RRC (g g-1)	3.10199		Conc (M)	0.400497
										MI Solvents (g g-1)	4.91104
SUMMARY
			Entry	Substrate	AE	RME	PMI	PMIRRC	PMIsolv	Yield
					(%)	(%)	(g g-1)	(g g-1)	(g g-1)	(%)
			Literature data reported
				Reaction 5: [Acid] = 0.4 M	95.5668	81.4745	8.7834	2.21427	6.56913	89.3091
				Reaction 13: [Acid] = 0.2 M	82.5182	67.2217	8.324	1.99219	6.33181	84.3059
			Simulation A: [Acid] = 0.4 M, Literature data yield
				Reaction 5	95.5668	81.4745	8.66369	2.21427	6.44942	89.3091
				Reaction13	82.5182	67.2217	4.90482	1.99219	2.91263	84.3059
			Simulation B: [Acid] = Literature data, Yield = 90%
				Reaction 5	95.5668	82.1047	8.59719	2.19727	6.39991	90
				Reaction13	82.5182	71.762	7.79735	1.86614	5.93121	90
			Simulation C: [Acid] =0.4 M, Yield = 90%
				Reaction 5	95.5668	82.1047	8.59719	2.19727	6.39991	90
				Reaction13	82.5182	71.762	4.5945	1.86614	2.72836	90
			Simulation D: [Acid] =0.4 M, Yield = 50%
				Reaction 5	95.5668	45.6137	15.4749	3.95509	11.5198	50
				Reaction13	82.5182	39.8678	8.2701	3.35906	4.91104	50
			Simulation E: [Acid] =0.8 M, Yield = 90%
				Reaction 5	95.5668	82.1047	5.39723	2.19727	3.19996	90
				Reaction13	82.5182	71.762	3.23032	1.86614	1.36418	90
			Simulation F: Both CDI (1.1eq) as coupling reagent, [Acid] = 0.4M in THF, Yield = 90%
				Reaction 5	95.5668	82.1047	8.56249	2.16257	6.39991	90
				Reaction13	82.5182	71.762	4.53858	1.81023	2.72836	90
			Simulation H: Both ICBF (1.1eq) as coupling reagent, [Acid] = 0.4M in THF, Yield = 90%
				Reaction 5	95.5668	82.1047	8.36552	1.96561	6.39991	90
				Reaction13	82.5182	71.762	4.45169	1.72333	2.72836	90

## Sheet: Different coupling reagents
SOCl2 (1.1 eq, MW = 118.97 g mol-1), [Acid] = 0.4 M THF, Yield = 90%
		METRICS
		Reactant (Limiting Reactant First)	Mass (g)	MW (g mol-1)	equiv	Mol	Catalyst	Mass (g)	Reagent	MW (g mol-1)	Mass (g)	Reaction Solvent	Volume (mL)	Density (g.mL-1)	Mass (g)	Work up Chemical	Mass (g)	Workup Solvent	Volume (mL)	Density (g mL-1)	Mass (g)
Reaction 5		3,4,5-Trimethoxybenzoic acid	4244	212.2	1	20			SOCl2	118.96	2617.12	THF	50500	0.883	44591.5						0
		Dimethylaminoethoxybenzylamine	4274.16	194.28	1.1	22															0
		Total	8518.16	406.48		42		0			2617.12		50500		44591.5		0				0
										Yield (%)	90
										AE (%)	95.5668						mass (g)	MW	mol
										RME (%)	82.0867					Product	6992.28	388.46	18
										MI total (g g-1)	7.96976
										MI RRC (g g-1)	1.59251		Conc (M)	0.39604
										MI Solvents (g g-1)	6.37725
		METRICS
		Reactant (Limiting Reactant First)	Mass (g)	MW (g mol-1)	equiv	Mol	Catalyst	Mass (g)	Reagent	MW (g mol-1)	Mass (g)	Reaction Solvent	Volume (mL)	Density (g.mL-1)	Mass (g)	Work up Chemical	Mass (g)	Workup Solvent	Volume (mL)	Density (g mL-1)	Mass (g)
Reaction 13		Carboxylic acid	15494.6	774.73	1	20			SOCl2	118.96	2617.12	THF	50600	0.883	44679.8						0
		Aminocyclopropane salt	6894.14	313.37	1.1	22															0
		Total	22388.7	1088.1		42		0			2617.12		50600		44679.8		0				0
										Yield (%)	90
										AE (%)	82.5182						mass (g)	MW	mol
										RME (%)	72.1874					Product	16161.8	897.88	18
										MI total (g g-1)	4.31174
										MI RRC (g g-1)	1.54722		Conc (M)	0.395257
										MI Solvents (g g-1)	2.76452
(COCl)2 (1.1 eq, MW = 126.93 g mol-1), [Acid] = 0.4 M THF, Yield = 90%
		METRICS
		Reactant (Limiting Reactant First)	Mass (g)	MW (g mol-1)	equiv	Mol	Catalyst	Mass (g)	Reagent	MW (g mol-1)	Mass (g)	Reaction Solvent	Volume (mL)	Density (g.mL-1)	Mass (g)	Work up Chemical	Mass (g)	Workup Solvent	Volume (mL)	Density (g mL-1)	Mass (g)
Reaction 5		3,4,5-Trimethoxybenzoic acid	4244	212.2	1	20			(COCl)2	126.92	2792.24	THF	50600	0.883	44679.8						0
		Dimethylaminoethoxybenzylamine	4274.16	194.28	1.1	22															0
		Total	8518.16	406.48		42		0			2792.24		50600		44679.8		0				0
										Yield (%)	90
										AE (%)	95.5668						mass (g)	MW	mol
										RME (%)	82.0867					Product	6992.28	388.46	18
										MI total (g g-1)	8.00743
										MI RRC (g g-1)	1.61756		Conc (M)	0.395257
										MI Solvents (g g-1)	6.38988
		METRICS
		Reactant (Limiting Reactant First)	Mass (g)	MW (g mol-1)	equiv	Mol	Catalyst	Mass (g)	Reagent	MW (g mol-1)	Mass (g)	Reaction Solvent	Volume (mL)	Density (g.mL-1)	Mass (g)	Work up Chemical	Mass (g)	Workup Solvent	Volume (mL)	Density (g mL-1)	Mass (g)
Reaction 13		Carboxylic acid	15494.6	774.73	1	20			(COCl)2	126.92	2792.24	THF	50600	0.883	44679.8						0
		Aminocyclopropane salt	6894.14	313.37	1.1	22															0
		Total	22388.7	1088.1		42		0			2792.24		50600		44679.8		0				0
										Yield (%)	90
										AE (%)	82.5182						mass (g)	MW	mol
										RME (%)	72.1874					Product	16161.8	897.88	18
										MI total (g g-1)	4.32258
										MI RRC (g g-1)	1.55805		Conc (M)	0.395257
										MI Solvents (g g-1)	2.76452
CDI (1.1 eq, MW = 162.15 g mol-1), [Acid] = 0.4 M THF, Yield = 90%
		METRICS
		Reactant (Limiting Reactant First)	Mass (g)	MW (g mol-1)	equiv	Mol	Catalyst	Mass (g)	Reagent	MW (g mol-1)	Mass (g)	Reaction Solvent	Volume (mL)	Density (g.mL-1)	Mass (g)	Work up Chemical	Mass (g)	Workup Solvent	Volume (mL)	Density (g mL-1)	Mass (g)
Reaction 5		3,4,5-Trimethoxybenzoic acid	4244	212.2	1	20			CDI	162.15	3567.3	THF	50600	0.883	44679.8						0
		Dimethylaminoethoxybenzylamine	4274.16	194.28	1.1	22															0
		Total	8518.16	406.48		42		0			3567.3		50600		44679.8		0				0
										Yield (%)	90
										AE (%)	95.5668						mass (g)	MW	mol
										RME (%)	82.0867					Product	6992.28	388.46	18
										MI total (g g-1)	8.11828
										MI RRC (g g-1)	1.7284		Conc (M)	0.395257
										MI Solvents (g g-1)	6.38988
		METRICS
		Reactant (Limiting Reactant First)	Mass (g)	MW (g mol-1)	equiv	Mol	Catalyst	Mass (g)	Reagent	MW (g mol-1)	Mass (g)	Reaction Solvent	Volume (mL)	Density (g.mL-1)	Mass (g)	Work up Chemical	Mass (g)	Workup Solvent	Volume (mL)	Density (g mL-1)	Mass (g)
Reaction 13		Carboxylic acid	15494.6	774.73	1	20			CDI	162.15	3567.3	THF	50600	0.883	44679.8						0
		Aminocyclopropane salt	6894.14	313.37	1.1	22															0
		Total	22388.7	1088.1		42		0			3567.3		50600		44679.8		0				0
										Yield (%)	90
										AE (%)	82.5182						mass (g)	MW	mol
										RME (%)	72.1874					Product	16161.8	897.88	18
										MI total (g g-1)	4.37053
										MI RRC (g g-1)	1.60601		Conc (M)	0.395257
										MI Solvents (g g-1)	2.76452
DCC (1.1 eq, MW = 206.33 g mol-1), [Acid] = 0.4 M THF, Yield = 90%
		METRICS
		Reactant (Limiting Reactant First)	Mass (g)	MW (g mol-1)	equiv	Mol	Catalyst	Mass (g)	Reagent	MW (g mol-1)	Mass (g)	Reaction Solvent	Volume (mL)	Density (g.mL-1)	Mass (g)	Work up Chemical	Mass (g)	Workup Solvent	Volume (mL)	Density (g mL-1)	Mass (g)
Reaction 5		3,4,5-Trimethoxybenzoic acid	4244	212.2	1	20			DCC	206.33	4539.26	THF	50600	0.883	44679.8						0
		Dimethylaminoethoxybenzylamine	4274.16	194.28	1.1	22					0										0
		Total	8518.16	406.48		42		0			4539.26		50600		44679.8		0				0
										Yield (%)	90
										AE (%)	95.5668						mass (g)	MW	mol
										RME (%)	82.0867					Product	6992.28	388.46	18
										MI total (g g-1)	8.25728
										MI RRC (g g-1)	1.86741		Conc (M)	0.395257
										MI Solvents (g g-1)	6.38988
		METRICS
		Reactant (Limiting Reactant First)	Mass (g)	MW (g mol-1)	equiv	Mol	Catalyst	Mass (g)	Reagent	MW (g mol-1)	Mass (g)	Reaction Solvent	Volume (mL)	Density (g.mL-1)	Mass (g)	Work up Chemical	Mass (g)	Workup Solvent	Volume (mL)	Density (g mL-1)	Mass (g)
Reaction 13		Carboxylic acid	15494.6	774.73	1	20			DCC	206.33	4539.26	THF	50600	0.883	44679.8						0
		Aminocyclopropane salt	6894.14	313.37	1.1	22					0										0
		Total	22388.7	1088.1		42		0			4539.26		50600		44679.8		0				0
										Yield (%)	90
										AE (%)	82.5182						mass (g)	MW	mol
										RME (%)	72.1874					Product	16161.8	897.88	18
										MI total (g g-1)	4.43067
										MI RRC (g g-1)	1.66615		Conc (M)	0.395257
										MI Solvents (g g-1)	2.76452
EDC (1.1 eq, MW = 191.70 g mol-1), [Acid] = 0.4 M THF, Yield = 90%
		METRICS
		Reactant (Limiting Reactant First)	Mass (g)	MW (g mol-1)	equiv	Mol	Catalyst	Mass (g)	Reagent	MW (g mol-1)	Mass (g)	Reaction Solvent	Volume (mL)	Density (g.mL-1)	Mass (g)	Work up Chemical	Mass (g)	Workup Solvent	Volume (mL)	Density (g mL-1)	Mass (g)
Reaction 5		3,4,5-Trimethoxybenzoic acid	4244	212.2	1	20			EDC HCl	191.7	4217.4	THF	50600	0.883	44679.8						0
		Dimethylaminoethoxybenzylamine	4274.16	194.28	1.1	22					0										0
		Total	8518.16	406.48		42		0			4217.4		50600		44679.8		0				0
										Yield (%)	90
										AE (%)	95.5668						mass (g)	MW	mol
										RME (%)	82.0867					Product	6992.28	388.46	18
										MI total (g g-1)	8.21125
										MI RRC (g g-1)	1.82137		Conc (M)	0.395257
										MI Solvents (g g-1)	6.38988
		METRICS
		Reactant (Limiting Reactant First)	Mass (g)	MW (g mol-1)	equiv	Mol	Catalyst	Mass (g)	Reagent	MW (g mol-1)	Mass (g)	Reaction Solvent	Volume (mL)	Density (g.mL-1)	Mass (g)	Work up Chemical	Mass (g)	Workup Solvent	Volume (mL)	Density (g mL-1)	Mass (g)
Reaction 13		Carboxylic acid	15494.6	774.73	1	20			EDC HCl	191.7	4217.4	THF	50600	0.883	44679.8						0
		Aminocyclopropane salt	6894.14	313.37	1.1	22					0										0
		Total	22388.7	1088.1		42		0			4217.4		50600		44679.8		0				0
										Yield (%)	90
										AE (%)	82.5182						mass (g)	MW	mol
										RME (%)	72.1874					Product	16161.8	897.88	18
										MI total (g g-1)	4.41076
										MI RRC (g g-1)	1.64623		Conc (M)	0.395257
										MI Solvents (g g-1)	2.76452
PivCl (1.1 eq, MW = 120.58 g mol-1), [Acid] = 0.4 M THF, Yield = 90%
		METRICS
		Reactant (Limiting Reactant First)	Mass (g)	MW (g mol-1)	equiv	Mol	Catalyst	Mass (g)	Reagent	MW (g mol-1)	Mass (g)	Reaction Solvent	Volume (mL)	Density (g.mL-1)	Mass (g)	Work up Chemical	Mass (g)	Workup Solvent	Volume (mL)	Density (g mL-1)	Mass (g)
Reaction 5		3,4,5-Trimethoxybenzoic acid	4244	212.2	1	20			PivCl	120.58	2652.76	THF	50600	0.883	44679.8						0
		Dimethylaminoethoxybenzylamine	4274.16	194.28	1.1	22					0										0
		Total	8518.16	406.48		42		0			2652.76		50600		44679.8		0				0
										Yield (%)	90
										AE (%)	95.5668						mass (g)	MW	mol
										RME (%)	82.0867					Product	6992.28	388.46	18
										MI total (g g-1)	7.98748
										MI RRC (g g-1)	1.59761		Conc (M)	0.395257
										MI Solvents (g g-1)	6.38988
		METRICS
		Reactant (Limiting Reactant First)	Mass (g)	MW (g mol-1)	equiv	Mol	Catalyst	Mass (g)	Reagent	MW (g mol-1)	Mass (g)	Reaction Solvent	Volume (mL)	Density (g.mL-1)	Mass (g)	Work up Chemical	Mass (g)	Workup Solvent	Volume (mL)	Density (g mL-1)	Mass (g)
Reaction 13		Carboxylic acid	15494.6	774.73	1	20			PivCl	120.58	2652.76	THF	50600	0.883	44679.8						0
		Aminocyclopropane salt	6894.14	313.37	1.1	22					0										0
		Total	22388.7	1088.1		42		0			2652.76		50600		44679.8		0				0
										Yield (%)	90
										AE (%)	82.5182						mass (g)	MW	mol
										RME (%)	72.1874					Product	16161.8	897.88	18
										MI total (g g-1)	4.31395
										MI RRC (g g-1)	1.54942		Conc (M)	0.395257
										MI Solvents (g g-1)	2.76452
ICBF (1.1 eq, MW = 138.58 g mol-1), [Acid] = 0.4 M THF, Yield = 90%
		METRICS
		Reactant (Limiting Reactant First)	Mass (g)	MW (g mol-1)	equiv	Mol	Catalyst	Mass (g)	Reagent	MW (g mol-1)	Mass (g)	Reaction Solvent	Volume (mL)	Density (g.mL-1)	Mass (g)	Work up Chemical	Mass (g)	Workup Solvent	Volume (mL)	Density (g mL-1)	Mass (g)
Reaction 5		3,4,5-Trimethoxybenzoic acid	4244	212.2	1	20			IBCF	136.58	3004.76	THF	50600	0.883	44679.8						0
		Dimethylaminoethoxybenzylamine	4274.16	194.28	1.1	22					0										0
		Total	8518.16	406.48		42		0			3004.76		50600		44679.8		0				0
										Yield (%)	90
										AE (%)	95.5668						mass (g)	MW	mol
										RME (%)	82.0867					Product	6992.28	388.46	18
										MI total (g g-1)	8.03782
										MI RRC (g g-1)	1.64795		Conc (M)	0.395257
										MI Solvents (g g-1)	6.38988
		METRICS
		Reactant (Limiting Reactant First)	Mass (g)	MW (g mol-1)	equiv	Mol	Catalyst	Mass (g)	Reagent	MW (g mol-1)	Mass (g)	Reaction Solvent	Volume (mL)	Density (g.mL-1)	Mass (g)	Work up Chemical	Mass (g)	Workup Solvent	Volume (mL)	Density (g mL-1)	Mass (g)
Reaction 13		Carboxylic acid	15494.6	774.73	1	20			IBCF	136.58	3004.76	THF	50600	0.883	44679.8						0
		Aminocyclopropane salt	6894.14	313.37	1.1	22															0
		Total	22388.7	1088.1		42		0			3004.76		50600		44679.8		0				0
										Yield (%)	90
										AE (%)	82.5182						mass (g)	MW	mol
										RME (%)	72.1874					Product	16161.8	897.88	18
										MI total (g g-1)	4.33573
										MI RRC (g g-1)	1.5712		Conc (M)	0.395257
										MI Solvents (g g-1)	2.76452
T3P (1.1 eq, MW = 318.18 g mol-1), [Acid] = 0.4 M THF, Yield = 90%
		METRICS
		Reactant (Limiting Reactant First)	Mass (g)	MW (g mol-1)	equiv	Mol	Catalyst	Mass (g)	Reagent	MW (g mol-1)	Mass (g)	Reaction Solvent	Volume (mL)	Density (g.mL-1)	Mass (g)	Work up Chemical	Mass (g)	Workup Solvent	Volume (mL)	Density (g mL-1)	Mass (g)
Reaction 5		3,4,5-Trimethoxybenzoic acid	4244	212.2	1	20			T3P	318.18	6999.96	THF	50600	0.883	44679.8						0
		Dimethylaminoethoxybenzylamine	4274.16	194.28	1.1	22															0
		Total	8518.16	406.48		42		0			6999.96		50600		44679.8		0				0
										Yield (%)	90
										AE (%)	95.5668						mass (g)	MW	mol
										RME (%)	82.0867					Product	6992.28	388.46	18
										MI total (g g-1)	8.6092
										MI RRC (g g-1)	2.21932		Conc (M)	0.395257
										MI Solvents (g g-1)	6.38988
		METRICS
		Reactant (Limiting Reactant First)	Mass (g)	MW (g mol-1)	equiv	Mol	Catalyst	Mass (g)	Reagent	MW (g mol-1)	Mass (g)	Reaction Solvent	Volume (mL)	Density (g.mL-1)	Mass (g)	Work up Chemical	Mass (g)	Workup Solvent	Volume (mL)	Density (g mL-1)	Mass (g)
Reaction 13		Carboxylic acid	15494.6	774.73	1	20			T3P	318.18	6999.96	THF	50600	0.883	44679.8						0
		Aminocyclopropane salt	6894.14	313.37	1.1	22															0
		Total	22388.7	1088.1		42		0			6999.96		50600		44679.8		0				0
										Yield (%)	90
										AE (%)	82.5182						mass (g)	MW	mol
										RME (%)	72.1874					Product	16161.8	897.88	18
										MI total (g g-1)	4.58292
										MI RRC (g g-1)	1.8184		Conc (M)	0.395257
										MI Solvents (g g-1)	2.76452
SOCl2 (1.1 eq, MW = 118.97 g mol-1), [Acid] = 0.4 M THF, Yield = literature
		METRICS
		Reactant (Limiting Reactant First)	Mass (g)	MW (g mol-1)	equiv	Mol	Catalyst	Mass (g)	Reagent	MW (g mol-1)	Mass (g)	Reaction Solvent	Volume (mL)	Density (g.mL-1)	Mass (g)	Work up Chemical	Mass (g)	Workup Solvent	Volume (mL)	Density (g mL-1)	Mass (g)
Reaction 5		3,4,5-Trimethoxybenzoic acid	4244	212.2	1	20			SOCl2	118.96	2617.12	THF	50600	0.883	44679.8						0
		Dimethylaminoethoxybenzylamine	4274.16	194.28	1.1	22															0
		Total	8518.16	406.48		42		0			2617.12		50600		44679.8		0				0
										Yield (%)	89
										AE (%)	95.5668						mass (g)	MW	mol
										RME (%)	81.1747					Product	6914.59	388.46	17.8
										MI total (g g-1)	8.07208
										MI RRC (g g-1)	1.6104		Conc (M)	0.395257
										MI Solvents (g g-1)	6.46167
		METRICS
		Reactant (Limiting Reactant First)	Mass (g)	MW (g mol-1)	equiv	Mol	Catalyst	Mass (g)	Reagent	MW (g mol-1)	Mass (g)	Reaction Solvent	Volume (mL)	Density (g.mL-1)	Mass (g)	Work up Chemical	Mass (g)	Workup Solvent	Volume (mL)	Density (g mL-1)	Mass (g)
Reaction 13		20	15494.6	774.73	1	20			SOCl2	118.96	2617.12	THF	50600	0.883	44679.8						0
		2	6894.14	313.37	1.1	22															0
		Total	22388.7	1088.1		42		0			2617.12		50600		44679.8		0				0
										Yield (%)	84
										AE (%)	82.5182						mass (g)	MW	mol
										RME (%)	67.3749					Product	15084.4	897.88	16.8
										MI total (g g-1)	4.61972
										MI RRC (g g-1)	1.65773		Conc (M)	0.395257
										MI Solvents (g g-1)	2.96199
(COCl)2 (1.1 eq), [Acid] = 0.4 M THF, Yield = literature
		METRICS
		Reactant (Limiting Reactant First)	Mass (g)	MW (g mol-1)	equiv	Mol	Catalyst	Mass (g)	Reagent	MW (g mol-1)	Mass (g)	Reaction Solvent	Volume (mL)	Density (g.mL-1)	Mass (g)	Work up Chemical	Mass (g)	Workup Solvent	Volume (mL)	Density (g mL-1)	Mass (g)
Reaction 5		3,4,5-Trimethoxybenzoic acid	4244	212.2	1	20			(COCl)2	126.92	2792.24	THF	50600	0.883	44679.8						0
		Dimethylaminoethoxybenzylamine	4274.16	194.28	1.1	22															0
		Total	8518.16	406.48		42		0			2792.24		50600		44679.8		0				0
										Yield (%)	89
										AE (%)	95.5668						mass (g)	MW	mol
										RME (%)	81.1747					Product	6914.59	388.46	17.8
										MI total (g g-1)	8.0974
										MI RRC (g g-1)	1.63573		Conc (M)	0.395257
										MI Solvents (g g-1)	6.46167
		METRICS
		Reactant (Limiting Reactant First)	Mass (g)	MW (g mol-1)	equiv	Mol	Catalyst	Mass (g)	Reagent	MW (g mol-1)	Mass (g)	Reaction Solvent	Volume (mL)	Density (g.mL-1)	Mass (g)	Work up Chemical	Mass (g)	Workup Solvent	Volume (mL)	Density (g mL-1)	Mass (g)
Reaction 13		20	15494.6	774.73	1	20			(COCl)2	126.92	2792.24	THF	50600	0.883	44679.8						0
		2	6894.14	313.37	1.1	22															0
		Total	22388.7	1088.1		42		0			2792.24		50600		44679.8		0				0
										Yield (%)	84
										AE (%)	82.5182						mass (g)	MW	mol
										RME (%)	67.3749					Product	15084.4	897.88	16.8
										MI total (g g-1)	4.63133
										MI RRC (g g-1)	1.66934		Conc (M)	0.395257
										MI Solvents (g g-1)	2.96199
CDI (1.1 eq), [Acid] = 0.4 M THF, Yield = literature
		METRICS
		Reactant (Limiting Reactant First)	Mass (g)	MW (g mol-1)	equiv	Mol	Catalyst	Mass (g)	Reagent	MW (g mol-1)	Mass (g)	Reaction Solvent	Volume (mL)	Density (g.mL-1)	Mass (g)	Work up Chemical	Mass (g)	Workup Solvent	Volume (mL)	Density (g mL-1)	Mass (g)
Reaction 5		3,4,5-Trimethoxybenzoic acid	4244	212.2	1	20			CDI	162.15	3567.3	THF	50600	0.883	44679.8						0
		Dimethylaminoethoxybenzylamine	4274.16	194.28	1.1	22															0
		Total	8518.16	406.48		42		0			3567.3		50600		44679.8		0				0
										Yield (%)	89
										AE (%)	95.5668						mass (g)	MW	mol
										RME (%)	81.1747					Product	6914.59	388.46	17.8
										MI total (g g-1)	8.20949
										MI RRC (g g-1)	1.74782		Conc (M)	0.395257
										MI Solvents (g g-1)	6.46167
		METRICS
		Reactant (Limiting Reactant First)	Mass (g)	MW (g mol-1)	equiv	Mol	Catalyst	Mass (g)	Reagent	MW (g mol-1)	Mass (g)	Reaction Solvent	Volume (mL)	Density (g.mL-1)	Mass (g)	Work up Chemical	Mass (g)	Workup Solvent	Volume (mL)	Density (g mL-1)	Mass (g)
Reaction 13		20	15494.6	774.73	1	20			CDI	162.15	3567.3	THF	50600	0.883	44679.8						0
		2	6894.14	313.37	1.1	22															0
		Total	22388.7	1088.1		42		0			3567.3		50600		44679.8		0				0
										Yield (%)	84
										AE (%)	82.5182						mass (g)	MW	mol
										RME (%)	67.3749					Product	15084.4	897.88	16.8
										MI total (g g-1)	4.68271
										MI RRC (g g-1)	1.72072		Conc (M)	0.395257
										MI Solvents (g g-1)	2.96199
DCC (1.1 eq), [Acid] = 0.4 M THF, Yield = literature
		METRICS
		Reactant (Limiting Reactant First)	Mass (g)	MW (g mol-1)	equiv	Mol	Catalyst	Mass (g)	Reagent	MW (g mol-1)	Mass (g)	Reaction Solvent	Volume (mL)	Density (g.mL-1)	Mass (g)	Work up Chemical	Mass (g)	Workup Solvent	Volume (mL)	Density (g mL-1)	Mass (g)
Reaction 5		3,4,5-Trimethoxybenzoic acid	4244	212.2	1	20			DCC	206.33	4539.26	THF	50600	0.883	44679.8						0
		Dimethylaminoethoxybenzylamine	4274.16	194.28	1.1	22															0
		Total	8518.16	406.48		42		0			4539.26		50600		44679.8		0				0
										Yield (%)	89
										AE (%)	95.5668						mass (g)	MW	mol
										RME (%)	81.1747					Product	6914.59	388.46	17.8
										MI total (g g-1)	8.35006
										MI RRC (g g-1)	1.88839		Conc (M)	0.395257
										MI Solvents (g g-1)	6.46167
		METRICS
		Reactant (Limiting Reactant First)	Mass (g)	MW (g mol-1)	equiv	Mol	Catalyst	Mass (g)	Reagent	MW (g mol-1)	Mass (g)	Reaction Solvent	Volume (mL)	Density (g.mL-1)	Mass (g)	Work up Chemical	Mass (g)	Workup Solvent	Volume (mL)	Density (g mL-1)	Mass (g)
Reaction 13		20	15494.6	774.73	1	20			DCC	206.33	4539.26	THF	50600	0.883	44679.8						0
		2	6894.14	313.37	1.1	22															0
		Total	22388.7	1088.1		42		0			4539.26		50600		44679.8		0				0
										Yield (%)	84
										AE (%)	82.5182						mass (g)	MW	mol
										RME (%)	67.3749					Product	15084.4	897.88	16.8
										MI total (g g-1)	4.74715
										MI RRC (g g-1)	1.78516		Conc (M)	0.395257
										MI Solvents (g g-1)	2.96199
EDC (1.1 eq), [Acid] = 0.4 M THF, Yield = literature
		METRICS
		Reactant (Limiting Reactant First)	Mass (g)	MW (g mol-1)	equiv	Mol	Catalyst	Mass (g)	Reagent	MW (g mol-1)	Mass (g)	Reaction Solvent	Volume (mL)	Density (g.mL-1)	Mass (g)	Work up Chemical	Mass (g)	Workup Solvent	Volume (mL)	Density (g mL-1)	Mass (g)
Reaction 5		3,4,5-Trimethoxybenzoic acid	4244	212.2	1	20			EDC HCl	191.7	4217.4	THF	50600	0.883	44679.8						0
		Dimethylaminoethoxybenzylamine	4274.16	194.28	1.1	22															0
		Total	8518.16	406.48		42		0			4217.4		50600		44679.8		0				0
										Yield (%)	89
										AE (%)	95.5668						mass (g)	MW	mol
										RME (%)	81.1747					Product	6914.59	388.46	17.8
										MI total (g g-1)	8.30351
										MI RRC (g g-1)	1.84184		Conc (M)	0.395257
										MI Solvents (g g-1)	6.46167
		METRICS
		Reactant (Limiting Reactant First)	Mass (g)	MW (g mol-1)	equiv	Mol	Catalyst	Mass (g)	Reagent	MW (g mol-1)	Mass (g)	Reaction Solvent	Volume (mL)	Density (g.mL-1)	Mass (g)	Work up Chemical	Mass (g)	Workup Solvent	Volume (mL)	Density (g mL-1)	Mass (g)
Reaction 13		20	15494.6	774.73	1	20			EDC HCl	191.7	4217.4	THF	50600	0.883	44679.8						0
		2	6894.14	313.37	1.1	22															0
		Total	22388.7	1088.1		42		0			4217.4		50600		44679.8		0				0
										Yield (%)	84
										AE (%)	82.5182						mass (g)	MW	mol
										RME (%)	67.3749					Product	15084.4	897.88	16.8
										MI total (g g-1)	4.72581
										MI RRC (g g-1)	1.76382		Conc (M)	0.395257
										MI Solvents (g g-1)	2.96199
PiVCl (1.1 eq), [Acid] = 0.4 M THF, Yield = literature
		METRICS
		Reactant (Limiting Reactant First)	Mass (g)	MW (g mol-1)	equiv	Mol	Catalyst	Mass (g)	Reagent	MW (g mol-1)	Mass (g)	Reaction Solvent	Volume (mL)	Density (g.mL-1)	Mass (g)	Work up Chemical	Mass (g)	Workup Solvent	Volume (mL)	Density (g mL-1)	Mass (g)
Reaction 5		3,4,5-Trimethoxybenzoic acid	4244	212.2	1	20			PivCl	120.58	2652.76	THF	50600	0.883	44679.8						0
		Dimethylaminoethoxybenzylamine	4274.16	194.28	1.1	22															0
		Total	8518.16	406.48		42		0			2652.76		50600		44679.8		0				0
										Yield (%)	89
										AE (%)	95.5668						mass (g)	MW	mol
										RME (%)	81.1747					Product	6914.59	388.46	17.8
										MI total (g g-1)	8.07723
										MI RRC (g g-1)	1.61556		Conc (M)	0.395257
										MI Solvents (g g-1)	6.46167
		METRICS
		Reactant (Limiting Reactant First)	Mass (g)	MW (g mol-1)	equiv	Mol	Catalyst	Mass (g)	Reagent	MW (g mol-1)	Mass (g)	Reaction Solvent	Volume (mL)	Density (g.mL-1)	Mass (g)	Work up Chemical	Mass (g)	Workup Solvent	Volume (mL)	Density (g mL-1)	Mass (g)
Reaction 13		20	15494.6	774.73	1	20			PivCl	120.58	2652.76	THF	50600	0.883	44679.8						0
		2	6894.14	313.37	1.1	22															0
		Total	22388.7	1088.1		42		0			2652.76		50600		44679.8		0				0
										Yield (%)	84
										AE (%)	82.5182						mass (g)	MW	mol
										RME (%)	67.3749					Product	15084.4	897.88	16.8
										MI total (g g-1)	4.62208
										MI RRC (g g-1)	1.66009		Conc (M)	0.395257
										MI Solvents (g g-1)	2.96199
IBCF(1.1 eq), [Acid] = 0.4 M THF, Yield = literature
		METRICS
		Reactant (Limiting Reactant First)	Mass (g)	MW (g mol-1)	equiv	Mol	Catalyst	Mass (g)	Reagent	MW (g mol-1)	Mass (g)	Reaction Solvent	Volume (mL)	Density (g.mL-1)	Mass (g)	Work up Chemical	Mass (g)	Workup Solvent	Volume (mL)	Density (g mL-1)	Mass (g)
Reaction 5		3,4,5-Trimethoxybenzoic acid	4244	212.2	1	20			IBCF	136.58	3004.76	THF	50600	0.883	44679.8						0
		Dimethylaminoethoxybenzylamine	4274.16	194.28	1.1	22															0
		Total	8518.16	406.48		42		0			3004.76		50600		44679.8		0				0
										Yield (%)	89
										AE (%)	95.5668						mass (g)	MW	mol
										RME (%)	81.1747					Product	6914.59	388.46	17.8
										MI total (g g-1)	8.12814
										MI RRC (g g-1)	1.66647		Conc (M)	0.395257
										MI Solvents (g g-1)	6.46167
		METRICS
		Reactant (Limiting Reactant First)	Mass (g)	MW (g mol-1)	equiv	Mol	Catalyst	Mass (g)	Reagent	MW (g mol-1)	Mass (g)	Reaction Solvent	Volume (mL)	Density (g.mL-1)	Mass (g)	Work up Chemical	Mass (g)	Workup Solvent	Volume (mL)	Density (g mL-1)	Mass (g)
Reaction 13		20	15494.6	774.73	1	20			IBCF	136.58	3004.76	THF	50600	0.883	44679.8						0
		2	6894.14	313.37	1.1	22															0
		Total	22388.7	1088.1		42		0			3004.76		50600		44679.8		0				0
										Yield (%)	84
										AE (%)	82.5182						mass (g)	MW	mol
										RME (%)	67.3749					Product	15084.4	897.88	16.8
										MI total (g g-1)	4.64542
										MI RRC (g g-1)	1.68343		Conc (M)	0.395257
										MI Solvents (g g-1)	2.96199
T3P (1.1 eq), [Acid] = 0.4 M THF, Yield = literature
		METRICS
		Reactant (Limiting Reactant First)	Mass (g)	MW (g mol-1)	equiv	Mol	Catalyst	Mass (g)	Reagent	MW (g mol-1)	Mass (g)	Reaction Solvent	Volume (mL)	Density (g.mL-1)	Mass (g)	Work up Chemical	Mass (g)	Workup Solvent	Volume (mL)	Density (g mL-1)	Mass (g)
		3,4,5-Trimethoxybenzoic acid	4244	212.2	1	20			T3P	318.18	6999.96	THF	50600	0.883	44679.8						0
		Dimethylaminoethoxybenzylamine	4274.16	194.28	1.1	22															0
		Total	8518.16	406.48		42		0			6999.96		50600		44679.8		0				0
										Yield (%)	89
										AE (%)	95.5668						mass (g)	MW	mol
										RME (%)	81.1747					Product	6914.59	388.46	17.8
										MI total (g g-1)	8.70593
										MI RRC (g g-1)	2.24426		Conc (M)	0.395257
										MI Solvents (g g-1)	6.46167
		METRICS
		Reactant (Limiting Reactant First)	Mass (g)	MW (g mol-1)	equiv	Mol	Catalyst	Mass (g)	Reagent	MW (g mol-1)	Mass (g)	Reaction Solvent	Volume (mL)	Density (g.mL-1)	Mass (g)	Work up Chemical	Mass (g)	Workup Solvent	Volume (mL)	Density (g mL-1)	Mass (g)
		20	15494.6	774.73	1	20			T3P	318.18	6999.96	THF	50600	0.883	44679.8						0
		2	6894.14	313.37	1.1	22															0
		Total	22388.7	1088.1		42		0			6999.96		50600		44679.8		0				0
										Yield (%)	84
										AE (%)	82.5182						mass (g)	MW	mol
										RME (%)	67.3749					Product	15084.4	897.88	16.8
										MI total (g g-1)	4.91028
										MI RRC (g g-1)	1.94829		Conc (M)	0.395257
										MI Solvents (g g-1)	2.96199
SOCl2 (1.1 eq, MW = 118.97 g mol-1), [Acid] = 0.4 M THF, Yield = 50%
		METRICS
		Reactant (Limiting Reactant First)	Mass (g)	MW (g mol-1)	equiv	Mol	Catalyst	Mass (g)	Reagent	MW (g mol-1)	Mass (g)	Reaction Solvent	Volume (mL)	Density (g.mL-1)	Mass (g)	Work up Chemical	Mass (g)	Workup Solvent	Volume (mL)	Density (g mL-1)	Mass (g)
Reaction 5		3,4,5-Trimethoxybenzoic acid	4244	212.2	1	20			SOCl2	118.96	2617.12	THF	50500	0.883	44591.5						0
		Dimethylaminoethoxybenzylamine	4274.16	194.28	1.1	22															0
		Total	8518.16	406.48		42		0			2617.12		50500		44591.5		0				0
										Yield (%)	50
										AE (%)	95.5668						mass (g)	MW	mol
										RME (%)	45.6037					Product	3884.6	388.46	10
										MI total (g g-1)	14.3456
										MI RRC (g g-1)	2.86652		Conc (M)	0.39604
										MI Solvents (g g-1)	11.479
		METRICS
		Reactant (Limiting Reactant First)	Mass (g)	MW (g mol-1)	equiv	Mol	Catalyst	Mass (g)	Reagent	MW (g mol-1)	Mass (g)	Reaction Solvent	Volume (mL)	Density (g.mL-1)	Mass (g)	Work up Chemical	Mass (g)	Workup Solvent	Volume (mL)	Density (g mL-1)	Mass (g)
Reaction 13		Carboxylic acid	15494.6	774.73	1	20			SOCl2	118.96	2617.12	THF	50600	0.883	44679.8						0
		Aminocyclopropane salt	6894.14	313.37	1.1	22															0
		Total	22388.7	1088.1		42		0			2617.12		50600		44679.8		0				0
										Yield (%)	50
										AE (%)	82.5182						mass (g)	MW	mol
										RME (%)	40.1041					Product	8978.8	897.88	10
										MI total (g g-1)	7.76113
										MI RRC (g g-1)	2.78499		Conc (M)	0.395257
										MI Solvents (g g-1)	4.97614
(COCl)2 (1.1 eq, MW = 126.93 g mol-1), [Acid] = 0.4 M THF, Yield = 50%
		METRICS
		Reactant (Limiting Reactant First)	Mass (g)	MW (g mol-1)	equiv	Mol	Catalyst	Mass (g)	Reagent	MW (g mol-1)	Mass (g)	Reaction Solvent	Volume (mL)	Density (g.mL-1)	Mass (g)	Work up Chemical	Mass (g)	Workup Solvent	Volume (mL)	Density (g mL-1)	Mass (g)
Reaction 5		3,4,5-Trimethoxybenzoic acid	4244	212.2	1	20			(COCl)2	126.92	2792.24	THF	50600	0.883	44679.8						0
		Dimethylaminoethoxybenzylamine	4274.16	194.28	1.1	22															0
		Total	8518.16	406.48		42		0			2792.24		50600		44679.8		0				0
										Yield (%)	50
										AE (%)	95.5668						mass (g)	MW	mol
										RME (%)	45.6037					Product	3884.6	388.46	10
										MI total (g g-1)	14.4134
										MI RRC (g g-1)	2.9116		Conc (M)	0.395257
										MI Solvents (g g-1)	11.5018
		METRICS
		Reactant (Limiting Reactant First)	Mass (g)	MW (g mol-1)	equiv	Mol	Catalyst	Mass (g)	Reagent	MW (g mol-1)	Mass (g)	Reaction Solvent	Volume (mL)	Density (g.mL-1)	Mass (g)	Work up Chemical	Mass (g)	Workup Solvent	Volume (mL)	Density (g mL-1)	Mass (g)
Reaction 13		Carboxylic acid	15494.6	774.73	1	20			(COCl)2	126.92	2792.24	THF	50600	0.883	44679.8						0
		Aminocyclopropane salt	6894.14	313.37	1.1	22															0
		Total	22388.7	1088.1		42		0			2792.24		50600		44679.8		0				0
										Yield (%)	50
										AE (%)	82.5182						mass (g)	MW	mol
										RME (%)	40.1041					Product	8978.8	897.88	10
										MI total (g g-1)	7.78064
										MI RRC (g g-1)	2.80449		Conc (M)	0.395257
										MI Solvents (g g-1)	4.97614
CDI (1.1 eq, MW = 162.15 g mol-1), [Acid] = 0.4 M THF, Yield = 50%
		METRICS
		Reactant (Limiting Reactant First)	Mass (g)	MW (g mol-1)	equiv	Mol	Catalyst	Mass (g)	Reagent	MW (g mol-1)	Mass (g)	Reaction Solvent	Volume (mL)	Density (g.mL-1)	Mass (g)	Work up Chemical	Mass (g)	Workup Solvent	Volume (mL)	Density (g mL-1)	Mass (g)
Reaction 5		3,4,5-Trimethoxybenzoic acid	4244	212.2	1	20			CDI	162.15	3567.3	THF	50600	0.883	44679.8						0
		Dimethylaminoethoxybenzylamine	4274.16	194.28	1.1	22															0
		Total	8518.16	406.48		42		0			3567.3		50600		44679.8		0				0
										Yield (%)	50
										AE (%)	95.5668						mass (g)	MW	mol
										RME (%)	45.6037					Product	3884.6	388.46	10
										MI total (g g-1)	14.6129
										MI RRC (g g-1)	3.11112		Conc (M)	0.395257
										MI Solvents (g g-1)	11.5018
		METRICS
		Reactant (Limiting Reactant First)	Mass (g)	MW (g mol-1)	equiv	Mol	Catalyst	Mass (g)	Reagent	MW (g mol-1)	Mass (g)	Reaction Solvent	Volume (mL)	Density (g.mL-1)	Mass (g)	Work up Chemical	Mass (g)	Workup Solvent	Volume (mL)	Density (g mL-1)	Mass (g)
Reaction 13		Carboxylic acid	15494.6	774.73	1	20			CDI	162.15	3567.3	THF	50600	0.883	44679.8						0
		Aminocyclopropane salt	6894.14	313.37	1.1	22															0
		Total	22388.7	1088.1		42		0			3567.3		50600		44679.8		0				0
										Yield (%)	50
										AE (%)	82.5182						mass (g)	MW	mol
										RME (%)	40.1041					Product	8978.8	897.88	10
										MI total (g g-1)	7.86696
										MI RRC (g g-1)	2.89081		Conc (M)	0.395257
										MI Solvents (g g-1)	4.97614
DCC (1.1 eq, MW = 206.33 g mol-1), [Acid] = 0.4 M THF, Yield = 50%
		METRICS
		Reactant (Limiting Reactant First)	Mass (g)	MW (g mol-1)	equiv	Mol	Catalyst	Mass (g)	Reagent	MW (g mol-1)	Mass (g)	Reaction Solvent	Volume (mL)	Density (g.mL-1)	Mass (g)	Work up Chemical	Mass (g)	Workup Solvent	Volume (mL)	Density (g mL-1)	Mass (g)
Reaction 5		3,4,5-Trimethoxybenzoic acid	4244	212.2	1	20			DCC	206.33	4539.26	THF	50600	0.883	44679.8						0
		Dimethylaminoethoxybenzylamine	4274.16	194.28	1.1	22					0										0
		Total	8518.16	406.48		42		0			4539.26		50600		44679.8		0				0
										Yield (%)	50
										AE (%)	95.5668						mass (g)	MW	mol
										RME (%)	45.6037					Product	3884.6	388.46	10
										MI total (g g-1)	14.8631
										MI RRC (g g-1)	3.36133		Conc (M)	0.395257
										MI Solvents (g g-1)	11.5018
		METRICS
		Reactant (Limiting Reactant First)	Mass (g)	MW (g mol-1)	equiv	Mol	Catalyst	Mass (g)	Reagent	MW (g mol-1)	Mass (g)	Reaction Solvent	Volume (mL)	Density (g.mL-1)	Mass (g)	Work up Chemical	Mass (g)	Workup Solvent	Volume (mL)	Density (g mL-1)	Mass (g)
Reaction 13		Carboxylic acid	15494.6	774.73	1	20			DCC	206.33	4539.26	THF	50600	0.883	44679.8						0
		Aminocyclopropane salt	6894.14	313.37	1.1	22					0										0
		Total	22388.7	1088.1		42		0			4539.26		50600		44679.8		0				0
										Yield (%)	50
										AE (%)	82.5182						mass (g)	MW	mol
										RME (%)	40.1041					Product	8978.8	897.88	10
										MI total (g g-1)	7.97521
										MI RRC (g g-1)	2.99906		Conc (M)	0.395257
										MI Solvents (g g-1)	4.97614
EDC (1.1 eq, MW = 191.70 g mol-1), [Acid] = 0.4 M THF, Yield = 50%
		METRICS
		Reactant (Limiting Reactant First)	Mass (g)	MW (g mol-1)	equiv	Mol	Catalyst	Mass (g)	Reagent	MW (g mol-1)	Mass (g)	Reaction Solvent	Volume (mL)	Density (g.mL-1)	Mass (g)	Work up Chemical	Mass (g)	Workup Solvent	Volume (mL)	Density (g mL-1)	Mass (g)
Reaction 5		3,4,5-Trimethoxybenzoic acid	4244	212.2	1	20			EDC HCl	191.7	4217.4	THF	50600	0.883	44679.8						0
		Dimethylaminoethoxybenzylamine	4274.16	194.28	1.1	22					0										0
		Total	8518.16	406.48		42		0			4217.4		50600		44679.8		0				0
										Yield (%)	50
										AE (%)	95.5668						mass (g)	MW	mol
										RME (%)	45.6037					Product	3884.6	388.46	10
										MI total (g g-1)	14.7803
										MI RRC (g g-1)	3.27847		Conc (M)	0.395257
										MI Solvents (g g-1)	11.5018
		METRICS
		Reactant (Limiting Reactant First)	Mass (g)	MW (g mol-1)	equiv	Mol	Catalyst	Mass (g)	Reagent	MW (g mol-1)	Mass (g)	Reaction Solvent	Volume (mL)	Density (g.mL-1)	Mass (g)	Work up Chemical	Mass (g)	Workup Solvent	Volume (mL)	Density (g mL-1)	Mass (g)
Reaction 13		Carboxylic acid	15494.6	774.73	1	20			EDC HCl	191.7	4217.4	THF	50600	0.883	44679.8						0
		Aminocyclopropane salt	6894.14	313.37	1.1	22					0										0
		Total	22388.7	1088.1		42		0			4217.4		50600		44679.8		0				0
										Yield (%)	50
										AE (%)	82.5182						mass (g)	MW	mol
										RME (%)	40.1041					Product	8978.8	897.88	10
										MI total (g g-1)	7.93936
										MI RRC (g g-1)	2.96322		Conc (M)	0.395257
										MI Solvents (g g-1)	4.97614
PivCl (1.1 eq, MW = 120.58 g mol-1), [Acid] = 0.4 M THF, Yield = 50%
		METRICS
		Reactant (Limiting Reactant First)	Mass (g)	MW (g mol-1)	equiv	Mol	Catalyst	Mass (g)	Reagent	MW (g mol-1)	Mass (g)	Reaction Solvent	Volume (mL)	Density (g.mL-1)	Mass (g)	Work up Chemical	Mass (g)	Workup Solvent	Volume (mL)	Density (g mL-1)	Mass (g)
Reaction 5		3,4,5-Trimethoxybenzoic acid	4244	212.2	1	20			PivCl	120.58	2652.76	THF	50600	0.883	44679.8						0
		Dimethylaminoethoxybenzylamine	4274.16	194.28	1.1	22					0										0
		Total	8518.16	406.48		42		0			2652.76		50600		44679.8		0				0
										Yield (%)	50
										AE (%)	95.5668						mass (g)	MW	mol
										RME (%)	45.6037					Product	3884.6	388.46	10
										MI total (g g-1)	14.3775
										MI RRC (g g-1)	2.87569		Conc (M)	0.395257
										MI Solvents (g g-1)	11.5018
		METRICS
		Reactant (Limiting Reactant First)	Mass (g)	MW (g mol-1)	equiv	Mol	Catalyst	Mass (g)	Reagent	MW (g mol-1)	Mass (g)	Reaction Solvent	Volume (mL)	Density (g.mL-1)	Mass (g)	Work up Chemical	Mass (g)	Workup Solvent	Volume (mL)	Density (g mL-1)	Mass (g)
Reaction 13		Carboxylic acid	15494.6	774.73	1	20			PivCl	120.58	2652.76	THF	50600	0.883	44679.8						0
		Aminocyclopropane salt	6894.14	313.37	1.1	22					0										0
		Total	22388.7	1088.1		42		0			2652.76		50600		44679.8		0				0
										Yield (%)	50
										AE (%)	82.5182						mass (g)	MW	mol
										RME (%)	40.1041					Product	8978.8	897.88	10
										MI total (g g-1)	7.7651
										MI RRC (g g-1)	2.78896		Conc (M)	0.395257
										MI Solvents (g g-1)	4.97614
ICBF (1.1 eq, MW = 138.58 g mol-1), [Acid] = 0.4 M THF, Yield = 50%
		METRICS
		Reactant (Limiting Reactant First)	Mass (g)	MW (g mol-1)	equiv	Mol	Catalyst	Mass (g)	Reagent	MW (g mol-1)	Mass (g)	Reaction Solvent	Volume (mL)	Density (g.mL-1)	Mass (g)	Work up Chemical	Mass (g)	Workup Solvent	Volume (mL)	Density (g mL-1)	Mass (g)
Reaction 5		3,4,5-Trimethoxybenzoic acid	4244	212.2	1	20			IBCF	136.58	3004.76	THF	50600	0.883	44679.8						0
		Dimethylaminoethoxybenzylamine	4274.16	194.28	1.1	22					0										0
		Total	8518.16	406.48		42		0			3004.76		50600		44679.8		0				0
										Yield (%)	50
										AE (%)	95.5668						mass (g)	MW	mol
										RME (%)	45.6037					Product	3884.6	388.46	10
										MI total (g g-1)	14.4681
										MI RRC (g g-1)	2.96631		Conc (M)	0.395257
										MI Solvents (g g-1)	11.5018
		METRICS
		Reactant (Limiting Reactant First)	Mass (g)	MW (g mol-1)	equiv	Mol	Catalyst	Mass (g)	Reagent	MW (g mol-1)	Mass (g)	Reaction Solvent	Volume (mL)	Density (g.mL-1)	Mass (g)	Work up Chemical	Mass (g)	Workup Solvent	Volume (mL)	Density (g mL-1)	Mass (g)
Reaction 13		Carboxylic acid	15494.6	774.73	1	20			IBCF	136.58	3004.76	THF	50600	0.883	44679.8						0
		Aminocyclopropane salt	6894.14	313.37	1.1	22															0
		Total	22388.7	1088.1		42		0			3004.76		50600		44679.8		0				0
										Yield (%)	50
										AE (%)	82.5182						mass (g)	MW	mol
										RME (%)	40.1041					Product	8978.8	897.88	10
										MI total (g g-1)	7.80431
										MI RRC (g g-1)	2.82816		Conc (M)	0.395257
										MI Solvents (g g-1)	4.97614
T3P (1.1 eq, MW = 318.18 g mol-1), [Acid] = 0.4 M THF, Yield = 50%
		METRICS
		Reactant (Limiting Reactant First)	Mass (g)	MW (g mol-1)	equiv	Mol	Catalyst	Mass (g)	Reagent	MW (g mol-1)	Mass (g)	Reaction Solvent	Volume (mL)	Density (g.mL-1)	Mass (g)	Work up Chemical	Mass (g)	Workup Solvent	Volume (mL)	Density (g mL-1)	Mass (g)
Reaction 5		3,4,5-Trimethoxybenzoic acid	4244	212.2	1	20			T3P	318.18	6999.96	THF	50600	0.883	44679.8						0
		Dimethylaminoethoxybenzylamine	4274.16	194.28	1.1	22															0
		Total	8518.16	406.48		42		0			6999.96		50600		44679.8		0				0
										Yield (%)	50
										AE (%)	95.5668						mass (g)	MW	mol
										RME (%)	45.6037					Product	3884.6	388.46	10
										MI total (g g-1)	15.4966
										MI RRC (g g-1)	3.99478		Conc (M)	0.395257
										MI Solvents (g g-1)	11.5018
		METRICS
		Reactant (Limiting Reactant First)	Mass (g)	MW (g mol-1)	equiv	Mol	Catalyst	Mass (g)	Reagent	MW (g mol-1)	Mass (g)	Reaction Solvent	Volume (mL)	Density (g.mL-1)	Mass (g)	Work up Chemical	Mass (g)	Workup Solvent	Volume (mL)	Density (g mL-1)	Mass (g)
Reaction 13		Carboxylic acid	15494.6	774.73	1	20			T3P	318.18	6999.96	THF	50600	0.883	44679.8						0
		Aminocyclopropane salt	6894.14	313.37	1.1	22															0
		Total	22388.7	1088.1		42		0			6999.96		50600		44679.8		0				0
										Yield (%)	50
										AE (%)	82.5182						mass (g)	MW	mol
										RME (%)	40.1041					Product	8978.8	897.88	10
										MI total (g g-1)	8.24926
										MI RRC (g g-1)	3.27312		Conc (M)	0.395257
										MI Solvents (g g-1)	4.97614
SUMMARY
			Entry	Substrate	AE	RME	PMI	PMIRRC	PMIsolv	Yield
					(%)	(%)	(g g-1)	(g g-1)	(g g-1)	(%)
			SOCl2 (1.1 eq, MW = 118.97 g mol-1), [Acid] = 0.4 M THF, Yield = 90%
				Reaction 5	95.5668	82.0867	7.96976	1.59251	6.37725	90
				Reaction 5 Literature	95.5668	81.1747	8.07208	1.6104	6.46167	89
					95.5668	45.6037	14.3456	2.86652	11.479	50
				Reaction 13	82.5182	72.1874	4.31174	1.54722	2.76452	90
				Reaction 13 Literature	82.5182	67.3749	4.61972	1.65773	2.96199	84
					82.5182	40.1041	7.76113	2.78499	4.97614	50
			(COCl)2 (1.1 eq, MW = 126.93 g mol-1), [Acid] = 0.4 M THF, Yield = 90%
				Reaction 5	95.5668	82.0867	8.00743	1.61756	6.38988	90
				Reaction 5 Literature	95.5668	81.1747	8.0974	1.63573	6.46167	89
					95.5668	45.6037	14.4134	2.9116	11.5018	50
				Reaction 13	82.5182	72.1874	4.32258	1.55805	2.76452	90
				Reaction 13 Literature	82.5182	67.3749	4.63133	1.66934	2.96199	84
					82.5182	40.1041	7.78064	2.80449	4.97614	50
			CDI (1.1 eq, MW = 162.15 g mol-1), [Acid] = 0.4 M THF, Yield = 90%
				Reaction 5	95.5668	82.0867	8.11828	1.7284	6.38988	90
				Reaction 5 Literature	95.5668	81.1747	8.20949	1.74782	6.46167	89
					95.5668	45.6037	14.6129	3.11112	11.5018	50
				Reaction 13	82.5182	72.1874	4.37053	1.60601	2.76452	90
				Reaction 13 Literature	82.5182	67.3749	4.68271	1.72072	2.96199	84
					82.5182	40.1041	7.86696	2.89081	4.97614	50
			DCC (1.1 eq, MW = 206.33 g mol-1), [Acid] = 0.4 M THF, Yield = 90%
				Reaction 5	95.5668	82.0867	8.25728	1.86741	6.38988	90
				Reaction 5 Literature	95.5668	81.1747	8.35006	1.88839	6.46167	89
					95.5668	45.6037	14.8631	3.36133	11.5018	50
				Reaction 13	82.5182	72.1874	4.43067	1.66615	2.76452	90
				Reaction 13 Literature	82.5182	67.3749	4.74715	1.78516	2.96199	84
					82.5182	40.1041	7.97521	2.99906	4.97614	50
			EDC (1.1 eq, MW = 191.70 g mol-1), [Acid] = 0.4 M THF, Yield = 90%
				Reaction 5	95.5668	82.0867	8.21125	1.82137	6.38988	90
				Reaction 5 Literature	95.5668	81.1747	8.30351	1.84184	6.46167	89
					95.5668	45.6037	14.7803	3.27847	11.5018	50
				Reaction 13	82.5182	72.1874	4.41076	1.64623	2.76452	90
				Reaction 13 Literature	82.5182	67.3749	4.72581	1.76382	2.96199	84
					82.5182	40.1041	7.93936	2.96322	4.97614	50
			PivCl (1.1 eq, MW = 120.58 g mol-1), [Acid] = 0.4 M THF, Yield = 90%
				Reaction 5	95.5668	82.0867	7.98748	1.59761	6.38988	90
				Reaction 5 Literature	95.5668	81.1747	8.07723	1.61556	6.46167	89
					95.5668	45.6037	14.3775	2.87569	11.5018	50
				Reaction 13	82.5182	72.1874	4.31395	1.54942	2.76452	90
				Reaction 13 Literature	82.5182	67.3749	4.62208	1.66009	2.96199	84
					82.5182	40.1041	7.7651	2.78896	4.97614	50
			ICBF (1.1 eq, MW = 138.58 g mol-1), [Acid] = 0.4 M THF, Yield = 90%
				Reaction 5	95.5668	82.0867	8.03782	1.64795	6.38988	90
				Reaction 5 Literature	95.5668	81.1747	8.12814	1.66647	6.46167	89
					95.5668	45.6037	14.4681	2.96631	11.5018	50
				Reaction 13	82.5182	72.1874	4.33573	1.5712	2.76452	90
				Reaction 13 Literature	82.5182	67.3749	4.64542	1.68343	2.96199	84
					82.5182	40.1041	7.80431	2.82816	4.97614	50
			T3P (1.1 eq, MW = 318.18 g mol-1), [Acid] = 0.4 M THF, Yield = 90%
				Reaction 5	95.5668	82.0867	8.6092	2.21932	6.38988	90
				Reaction 5 Literature	95.5668	81.1747	8.70593	2.24426	6.46167	89
					95.5668	45.6037	15.4966	3.99478	11.5018	50
				Reaction 13	82.5182	72.1874	4.58292	1.8184	2.76452	90
				Reaction 13 Literature	82.5182	67.3749	4.91028	1.94829	2.96199	84
					82.5182	40.1041	8.24926	3.27312	4.97614	50
