# Supplementary material for: Why we might be misusing process mass intensity (PMI) and a methodology to apply it effectively as a discovery level metric
Source: Royal Society of Chemistry journal article supplement (doi:10.1039/c9gc01537j), 2019-11-07
Supplement: c9gc01537j2.xlsx [file c9gc01537j2.xlsx]

## Sheet: DEAD A-E
Simulation 1: DEAD/PPh3 1.2 eq, Conc 0.4 M, yield of 90%
		METRICS
		Reactant (Limiting Reactant First)	Mass (g)	MW (g mmol-1)	equiv	Mol	Catalyst	Mass (g)	Reagent	MW (g mmol-1)	Mass (g)	Reaction Solvent	Volume (mL)	Density (g.mL-1)	Mass (g)	Work up Chemical	Mass (g)	Workup Solvent	Volume (mL)	Density (g mL-1)	Mass (g)
Reactant A		Benzoic acid	2.80876	122.12	1	0.023			PPh3	262.29	7.2392	THF	57.5	0.889	51.1175						0
		Benzyl alcohol	2.98466	108.14	1.2	0.0276			DEAD	174.16	4.80682				0						0
		Total	5.79342	230.26		0.0506		0			12.046				51.1175		0				0
										Yield (%)	90
										AE (%)	92.1784						mass (g)	MW	mol
										RME (%)	75.8373					Product	4.39358	212.25	0.0207
										MI total (g g-1)	15.695
										MI RRC (g g-1)	4.06035
										MI Solvents (g g-1)	11.6346		Conc (M)	0.4
		METRICS
		Reactant (Limiting Reactant First)	Mass (g)	MW (g mmol-1)	equiv	Mol	Catalyst	Mass (g)	Reagent	MW (g mmol-1)	Mass (g)	Reaction Solvent	Volume (mL)	Density (g.mL-1)	Mass (g)	Work up Chemical	Mass (g)	Workup Solvent	Volume (mL)	Density (g mL-1)	Mass (g)
Reactant B		4-Chlorobenzoic acid	3.60111	156.57	1	0.023			PPh3	262.29	7.2392	THF	57.5	0.889	51.1175						0
		Benzyl alcohol	2.98466	108.14	1.2	0.0276			DEAD	174.16	4.80682				0						0
		Total	6.58577	264.71		0.0506		0			12.046				51.1175		0				0
										Yield (%)	90
										AE (%)	93.1926						mass (g)	MW	mol
										RME (%)	77.5381					Product	5.10648	246.69	0.0207
										MI total (g g-1)	13.659
										MI RRC (g g-1)	3.64865
										MI Solvents (g g-1)	10.0103
		METRICS
		Reactant (Limiting Reactant First)	Mass (g)	MW (g mmol-1)	equiv	Mol	Catalyst	Mass (g)	Reagent	MW (g mmol-1)	Mass (g)	Reaction Solvent	Volume (mL)	Density (g.mL-1)	Mass (g)	Work up Chemical	Mass (g)	Workup Solvent	Volume (mL)	Density (g mL-1)	Mass (g)
Reactant C		3,5-Nitrobenzoic acid	4.87991	212.17	1	0.023			PPh3	262.29	7.2392	THF	57.5	0.889	51.1175						0
		Benzyl alcohol	2.98466	108.14	1.2	0.0276			DEAD	174.16	4.80682				0						0
		Total	7.86457	320.31		0.0506		0			12.046				51.1175		0				0
										Yield (%)	90
										AE (%)	94.3586						mass (g)	MW	mol
										RME (%)	79.5513					Product	6.25637	302.24	0.0207
										MI total (g g-1)	11.3529
										MI RRC (g g-1)	3.18245
										MI Solvents (g g-1)	8.17048
		METRICS
		Reactant (Limiting Reactant First)	Mass (g)	MW (g mmol-1)	equiv	Mol	Catalyst	Mass (g)	Reagent	MW (g mmol-1)	Mass (g)	Reaction Solvent	Volume (mL)	Density (g.mL-1)	Mass (g)	Work up Chemical	Mass (g)	Workup Solvent	Volume (mL)	Density (g mL-1)	Mass (g)
Reactant D		(2E)-3-[2-chloro-4-(cyclopentyloxy)-5-methoxyphenyl]acrylic acid	7.14771	310.77	1	0.023			PPh3	262.29	7.2392	THF	57.5	0.889	51.1175						0
		Benzyl alcohol	2.98466	108.14	1.2	0.0276			DEAD	174.16	4.80682				0						0
		Total	10.1324	418.91		0.0506		0			12.046				51.1175		0				0
										Yield (%)	90
										AE (%)	95.7007						mass (g)	MW	mol
										RME (%)	81.9021					Product	8.29863	400.9	0.0207
										MI total (g g-1)	8.83229
										MI RRC (g g-1)	2.67254
										MI Solvents (g g-1)	6.15975
		METRICS
		Reactant (Limiting Reactant First)	Mass (g)	MW (g mmol-1)	equiv	Mol	Catalyst	Mass (g)	Reagent	MW (g mmol-1)	Mass (g)	Reaction Solvent	Volume (mL)	Density (g.mL-1)	Mass (g)	Work up Chemical	Mass (g)	Workup Solvent	Volume (mL)	Density (g mL-1)	Mass (g)
Reactant E		Fmoc-D-Dab(Boc)-OH	10.1315	440.5	1	0.023			PPh3	262.29	7.2392	THF	57.5	0.889	51.1175						0
		Benzyl alcohol	2.98466	108.14	1.2	0.0276			DEAD	174.16	4.80682				0						0
		Total	13.1162	548.64		0.0506		0			12.046				51.1175		0				0
										Yield (%)	90
										AE (%)	96.7155						mass (g)	MW	mol
										RME (%)	83.7427					Product	10.9838	530.62	0.0207
										MI total (g g-1)	6.94472
										MI RRC (g g-1)	2.29084
										MI Solvents (g g-1)	4.65388
Simulation 2: DEAD/PPh3 1.2 eq, Conc 0.4 M, yield of 80%
		METRICS
		Reactant (Limiting Reactant First)	Mass (g)	MW (g mmol-1)	equiv	Mol	Catalyst	Mass (g)	Reagent	MW (g mmol-1)	Mass (g)	Reaction Solvent	Volume (mL)	Density (g.mL-1)	Mass (g)	Work up Chemical	Mass (g)	Workup Solvent	Volume (mL)	Density (g mL-1)	Mass (g)
Reactant A		Benzoic acid	2.80876	122.12	1	0.023			PPh3	262.29	7.2392	THF	57.5	0.889	51.1175						0
		Benzyl alcohol	2.98466	108.14	1.2	0.0276			DEAD	174.16	4.80682				0						0
		Total	5.79342	230.26		0.0506		0			12.046				51.1175		0				0
										Yield (%)	80
										AE (%)	92.1784						mass (g)	MW	mol
										RME (%)	67.4109					Product	3.9054	212.25	0.0184
										MI total (g g-1)	17.6568
										MI RRC (g g-1)	4.56789
										MI Solvents (g g-1)	13.0889		Conc (M)	0.4
		METRICS
		Reactant (Limiting Reactant First)	Mass (g)	MW (g mmol-1)	equiv	Mol	Catalyst	Mass (g)	Reagent	MW (g mmol-1)	Mass (g)	Reaction Solvent	Volume (mL)	Density (g.mL-1)	Mass (g)	Work up Chemical	Mass (g)	Workup Solvent	Volume (mL)	Density (g mL-1)	Mass (g)
Reactant B		4-Chlorobenzoic acid	3.60111	156.57	1	0.023			PPh3	262.29	7.2392	THF	57.5	0.889	51.1175						0
		Benzyl alcohol	2.98466	108.14	1.2	0.0276			DEAD	174.16	4.80682				0						0
		Total	6.58577	264.71		0.0506		0			12.046				51.1175		0				0
										Yield (%)	80
										AE (%)	93.1926						mass (g)	MW	mol
										RME (%)	68.9227					Product	4.5391	246.69	0.0184
										MI total (g g-1)	15.3663
										MI RRC (g g-1)	4.10474
										MI Solvents (g g-1)	11.2616
		METRICS
		Reactant (Limiting Reactant First)	Mass (g)	MW (g mmol-1)	equiv	Mol	Catalyst	Mass (g)	Reagent	MW (g mmol-1)	Mass (g)	Reaction Solvent	Volume (mL)	Density (g.mL-1)	Mass (g)	Work up Chemical	Mass (g)	Workup Solvent	Volume (mL)	Density (g mL-1)	Mass (g)
Reactant C		3,5-Nitrobenzoic acid	4.87991	212.17	1	0.023			PPh3	262.29	7.2392	THF	57.5	0.889	51.1175						0
		Benzyl alcohol	2.98466	108.14	1.2	0.0276			DEAD	174.16	4.80682				0						0
		Total	7.86457	320.31		0.0506		0			12.046				51.1175		0				0
										Yield (%)	80
										AE (%)	94.3586						mass (g)	MW	mol
										RME (%)	70.7122					Product	5.56122	302.24	0.0184
										MI total (g g-1)	12.772
										MI RRC (g g-1)	3.58026
										MI Solvents (g g-1)	9.19178
		METRICS
		Reactant (Limiting Reactant First)	Mass (g)	MW (g mmol-1)	equiv	Mol	Catalyst	Mass (g)	Reagent	MW (g mmol-1)	Mass (g)	Reaction Solvent	Volume (mL)	Density (g.mL-1)	Mass (g)	Work up Chemical	Mass (g)	Workup Solvent	Volume (mL)	Density (g mL-1)	Mass (g)
Reactant D		(2E)-3-[2-chloro-4-(cyclopentyloxy)-5-methoxyphenyl]acrylic acid	7.14771	310.77	1	0.023			PPh3	262.29	7.2392	THF	57.5	0.889	51.1175						0
		Benzyl alcohol	2.98466	108.14	1.2	0.0276			DEAD	174.16	4.80682				0						0
		Total	10.1324	418.91		0.0506		0			12.046				51.1175		0				0
										Yield (%)	80
										AE (%)	95.7007						mass (g)	MW	mol
										RME (%)	72.8019					Product	7.37656	400.9	0.0184
										MI total (g g-1)	9.93632
										MI RRC (g g-1)	3.0066
										MI Solvents (g g-1)	6.92972
		METRICS
		Reactant (Limiting Reactant First)	Mass (g)	MW (g mmol-1)	equiv	Mol	Catalyst	Mass (g)	Reagent	MW (g mmol-1)	Mass (g)	Reaction Solvent	Volume (mL)	Density (g.mL-1)	Mass (g)	Work up Chemical	Mass (g)	Workup Solvent	Volume (mL)	Density (g mL-1)	Mass (g)
Reactant E		Fmoc-D-Dab(Boc)-OH	10.1315	440.5	1	0.023			PPh3	262.29	7.2392	THF	57.5	0.889	51.1175						0
		Benzyl alcohol	2.98466	108.14	1.2	0.0276			DEAD	174.16	4.80682				0						0
		Total	13.1162	548.64		0.0506		0			12.046				51.1175		0				0
										Yield (%)	80
										AE (%)	96.7155						mass (g)	MW	mol
										RME (%)	74.438					Product	9.76341	530.62	0.0184
										MI total (g g-1)	7.81281
										MI RRC (g g-1)	2.57719
										MI Solvents (g g-1)	5.23562
Simulation 3: DEAD/PPh3 1.2 eq, Conc 0.4 M, yield of 70%
		METRICS
		Reactant (Limiting Reactant First)	Mass (g)	MW (g mmol-1)	equiv	Mol	Catalyst	Mass (g)	Reagent	MW (g mmol-1)	Mass (g)	Reaction Solvent	Volume (mL)	Density (g.mL-1)	Mass (g)	Work up Chemical	Mass (g)	Workup Solvent	Volume (mL)	Density (g mL-1)	Mass (g)
Reactant A		Benzoic acid	2.80876	122.12	1	0.023			PPh3	262.29	7.2392	THF	57.5	0.889	51.1175						0
		Benzyl alcohol	2.98466	108.14	1.2	0.0276			DEAD	174.16	4.80682				0						0
		Total	5.79342	230.26		0.0506		0			12.046				51.1175		0				0
										Yield (%)	70
										AE (%)	92.1784						mass (g)	MW	mol
										RME (%)	58.9845					Product	3.41722	212.25	0.0161
										MI total (g g-1)	20.1792
										MI RRC (g g-1)	5.22045
										MI Solvents (g g-1)	14.9588		Conc (M)	0.4
		METRICS
		Reactant (Limiting Reactant First)	Mass (g)	MW (g mmol-1)	equiv	Mol	Catalyst	Mass (g)	Reagent	MW (g mmol-1)	Mass (g)	Reaction Solvent	Volume (mL)	Density (g.mL-1)	Mass (g)	Work up Chemical	Mass (g)	Workup Solvent	Volume (mL)	Density (g mL-1)	Mass (g)
Reactant B		4-Chlorobenzoic acid	3.60111	156.57	1	0.023			PPh3	262.29	7.2392	THF	57.5	0.889	51.1175						0
		Benzyl alcohol	2.98466	108.14	1.2	0.0276			DEAD	174.16	4.80682				0						0
		Total	6.58577	264.71		0.0506		0			12.046				51.1175		0				0
										Yield (%)	70
										AE (%)	93.1926						mass (g)	MW	mol
										RME (%)	60.3074					Product	3.97171	246.69	0.0161
										MI total (g g-1)	17.5615
										MI RRC (g g-1)	4.69113
										MI Solvents (g g-1)	12.8704
		METRICS
		Reactant (Limiting Reactant First)	Mass (g)	MW (g mmol-1)	equiv	Mol	Catalyst	Mass (g)	Reagent	MW (g mmol-1)	Mass (g)	Reaction Solvent	Volume (mL)	Density (g.mL-1)	Mass (g)	Work up Chemical	Mass (g)	Workup Solvent	Volume (mL)	Density (g mL-1)	Mass (g)
Reactant C		3,5-Nitrobenzoic acid	4.87991	212.17	1	0.023			PPh3	262.29	7.2392	THF	57.5	0.889	51.1175						0
		Benzyl alcohol	2.98466	108.14	1.2	0.0276			DEAD	174.16	4.80682				0						0
		Total	7.86457	320.31		0.0506		0			12.046				51.1175		0				0
										Yield (%)	70
										AE (%)	94.3586						mass (g)	MW	mol
										RME (%)	61.8732					Product	4.86606	302.24	0.0161
										MI total (g g-1)	14.5966
										MI RRC (g g-1)	4.09172
										MI Solvents (g g-1)	10.5049
		METRICS
		Reactant (Limiting Reactant First)	Mass (g)	MW (g mmol-1)	equiv	Mol	Catalyst	Mass (g)	Reagent	MW (g mmol-1)	Mass (g)	Reaction Solvent	Volume (mL)	Density (g.mL-1)	Mass (g)	Work up Chemical	Mass (g)	Workup Solvent	Volume (mL)	Density (g mL-1)	Mass (g)
Reactant D		(2E)-3-[2-chloro-4-(cyclopentyloxy)-5-methoxyphenyl]acrylic acid	7.14771	310.77	1	0.023			PPh3	262.29	7.2392	THF	57.5	0.889	51.1175						0
		Benzyl alcohol	2.98466	108.14	1.2	0.0276			DEAD	174.16	4.80682				0						0
		Total	10.1324	418.91		0.0506		0			12.046				51.1175		0				0
										Yield (%)	70
										AE (%)	95.7007						mass (g)	MW	mol
										RME (%)	63.7017					Product	6.45449	400.9	0.0161
										MI total (g g-1)	11.3558
										MI RRC (g g-1)	3.43612
										MI Solvents (g g-1)	7.91968
		METRICS
		Reactant (Limiting Reactant First)	Mass (g)	MW (g mmol-1)	equiv	Mol	Catalyst	Mass (g)	Reagent	MW (g mmol-1)	Mass (g)	Reaction Solvent	Volume (mL)	Density (g.mL-1)	Mass (g)	Work up Chemical	Mass (g)	Workup Solvent	Volume (mL)	Density (g mL-1)	Mass (g)
Reactant E		Fmoc-D-Dab(Boc)-OH	10.1315	440.5	1	0.023			PPh3	262.29	7.2392	THF	57.5	0.889	51.1175						0
		Benzyl alcohol	2.98466	108.14	1.2	0.0276			DEAD	174.16	4.80682				0						0
		Total	13.1162	548.64		0.0506		0			12.046				51.1175		0				0
										Yield (%)	70
										AE (%)	96.7155						mass (g)	MW	mol
										RME (%)	65.1332					Product	8.54298	530.62	0.0161
										MI total (g g-1)	8.92893
										MI RRC (g g-1)	2.94536
										MI Solvents (g g-1)	5.98357
Simulation 4: DEAD/PPh3 1.2 eq, Conc 0.4 M, yield of 50%
		METRICS
		Reactant (Limiting Reactant First)	Mass (g)	MW (g mmol-1)	equiv	Mol	Catalyst	Mass (g)	Reagent	MW (g mmol-1)	Mass (g)	Reaction Solvent	Volume (mL)	Density (g.mL-1)	Mass (g)	Work up Chemical	Mass (g)	Workup Solvent	Volume (mL)	Density (g mL-1)	Mass (g)
Reactant A		Benzoic acid	2.80876	122.12	1	0.023			PPh3	262.29	7.2392	THF	57.5	0.889	51.1175						0
		Benzyl alcohol	2.98466	108.14	1.2	0.0276			DEAD	174.16	4.80682				0						0
		Total	5.79342	230.26		0.0506		0			12.046				51.1175		0				0
										Yield (%)	50
										AE (%)	92.1784						mass (g)	MW	mol
										RME (%)	42.1318					Product	2.44088	212.25	0.0115
										MI total (g g-1)	28.2509
										MI RRC (g g-1)	7.30863
										MI Solvents (g g-1)	20.9423		Conc (M)	0.4
		METRICS
		Reactant (Limiting Reactant First)	Mass (g)	MW (g mmol-1)	equiv	Mol	Catalyst	Mass (g)	Reagent	MW (g mmol-1)	Mass (g)	Reaction Solvent	Volume (mL)	Density (g.mL-1)	Mass (g)	Work up Chemical	Mass (g)	Workup Solvent	Volume (mL)	Density (g mL-1)	Mass (g)
Reactant B		4-Chlorobenzoic acid	3.60111	156.57	1	0.023			PPh3	262.29	7.2392	THF	57.5	0.889	51.1175						0
		Benzyl alcohol	2.98466	108.14	1.2	0.0276			DEAD	174.16	4.80682				0						0
		Total	6.58577	264.71		0.0506		0			12.046				51.1175		0				0
										Yield (%)	50
										AE (%)	93.1926						mass (g)	MW	mol
										RME (%)	43.0767					Product	2.83693	246.69	0.0115
										MI total (g g-1)	24.5861
										MI RRC (g g-1)	6.56758
										MI Solvents (g g-1)	18.0186
		METRICS
		Reactant (Limiting Reactant First)	Mass (g)	MW (g mmol-1)	equiv	Mol	Catalyst	Mass (g)	Reagent	MW (g mmol-1)	Mass (g)	Reaction Solvent	Volume (mL)	Density (g.mL-1)	Mass (g)	Work up Chemical	Mass (g)	Workup Solvent	Volume (mL)	Density (g mL-1)	Mass (g)
Reactant C		3,5-Nitrobenzoic acid	4.87991	212.17	1	0.023			PPh3	262.29	7.2392	THF	57.5	0.889	51.1175						0
		Benzyl alcohol	2.98466	108.14	1.2	0.0276			DEAD	174.16	4.80682				0						0
		Total	7.86457	320.31		0.0506		0			12.046				51.1175		0				0
										Yield (%)	50
										AE (%)	94.3586						mass (g)	MW	mol
										RME (%)	44.1951					Product	3.47576	302.24	0.0115
										MI total (g g-1)	20.4353
										MI RRC (g g-1)	5.72841
										MI Solvents (g g-1)	14.7069
		METRICS
		Reactant (Limiting Reactant First)	Mass (g)	MW (g mmol-1)	equiv	Mol	Catalyst	Mass (g)	Reagent	MW (g mmol-1)	Mass (g)	Reaction Solvent	Volume (mL)	Density (g.mL-1)	Mass (g)	Work up Chemical	Mass (g)	Workup Solvent	Volume (mL)	Density (g mL-1)	Mass (g)
Reactant D		(2E)-3-[2-chloro-4-(cyclopentyloxy)-5-methoxyphenyl]acrylic acid	7.14771	310.77	1	0.023			PPh3	262.29	7.2392	THF	57.5	0.889	51.1175						0
		Benzyl alcohol	2.98466	108.14	1.2	0.0276			DEAD	174.16	4.80682				0						0
		Total	10.1324	418.91		0.0506		0			12.046				51.1175		0				0
										Yield (%)	50
										AE (%)	95.7007						mass (g)	MW	mol
										RME (%)	45.5012					Product	4.61035	400.9	0.0115
										MI total (g g-1)	15.8981
										MI RRC (g g-1)	4.81057
										MI Solvents (g g-1)	11.0876
		METRICS
		Reactant (Limiting Reactant First)	Mass (g)	MW (g mmol-1)	equiv	Mol	Catalyst	Mass (g)	Reagent	MW (g mmol-1)	Mass (g)	Reaction Solvent	Volume (mL)	Density (g.mL-1)	Mass (g)	Work up Chemical	Mass (g)	Workup Solvent	Volume (mL)	Density (g mL-1)	Mass (g)
Reactant E		Fmoc-D-Dab(Boc)-OH	10.1315	440.5	1	0.023			PPh3	262.29	7.2392	THF	57.5	0.889	51.1175						0
		Benzyl alcohol	2.98466	108.14	1.2	0.0276			DEAD	174.16	4.80682				0						0
		Total	13.1162	548.64		0.0506		0			12.046				51.1175		0				0
										Yield (%)	50
										AE (%)	96.7155						mass (g)	MW	mol
										RME (%)	46.5237					Product	6.10213	530.62	0.0115
										MI total (g g-1)	12.5005
										MI RRC (g g-1)	4.12351
										MI Solvents (g g-1)	8.37699
Simulation 5: DEAD/PPh3 1.2 eq, Scale x5, Conc 0.4 M, yield of 90%
		METRICS
		Reactant (Limiting Reactant First)	Mass (g)	MW (g mmol-1)	equiv	Mol	Catalyst	Mass (g)	Reagent	MW (g mmol-1)	Mass (g)	Reaction Solvent	Volume (mL)	Density (g.mL-1)	Mass (g)	Work up Chemical	Mass (g)	Workup Solvent	Volume (mL)	Density (g mL-1)	Mass (g)
Reactant A		Benzoic acid	14.05	122.12	1	0.115051			PPh3	262.29	36.212	THF	287.5	0.889	255.588						0
		Benzyl alcohol	14.9299	108.14	1.2	0.138061			DEAD	174.16	24.0447				0						0
		Total	28.9799	230.26		0.253112		0			60.2567				255.588		0				0
										Yield (%)	90
										AE (%)	92.1784						mass (g)	MW	mol
										RME (%)	75.8373					Product	21.9776	212.25	0.103546
										MI total (g g-1)	15.6898
										MI RRC (g g-1)	4.06035
										MI Solvents (g g-1)	11.6295		Conc (M)	0.400177
		METRICS
		Reactant (Limiting Reactant First)	Mass (g)	MW (g mmol-1)	equiv	Mol	Catalyst	Mass (g)	Reagent	MW (g mmol-1)	Mass (g)	Reaction Solvent	Volume (mL)	Density (g.mL-1)	Mass (g)	Work up Chemical	Mass (g)	Workup Solvent	Volume (mL)	Density (g mL-1)	Mass (g)
Reactant B		4-Chlorobenzoic acid	18	156.57	1	0.114965			PPh3	262.29	36.1849	THF	287.5	0.889	255.588						0
		Benzyl alcohol	14.9187	108.14	1.2	0.137957			DEAD	174.16	24.0267				0						0
		Total	32.9187	264.71		0.252922		0			60.2115				255.588		0				0
										Yield (%)	90
										AE (%)	93.1926						mass (g)	MW	mol
										RME (%)	77.5381					Product	25.5245	246.69	0.103468
										MI total (g g-1)	13.6621
										MI RRC (g g-1)	3.64865
										MI Solvents (g g-1)	10.0134
		METRICS
		Reactant (Limiting Reactant First)	Mass (g)	MW (g mmol-1)	equiv	Mol	Catalyst	Mass (g)	Reagent	MW (g mmol-1)	Mass (g)	Reaction Solvent	Volume (mL)	Density (g.mL-1)	Mass (g)	Work up Chemical	Mass (g)	Workup Solvent	Volume (mL)	Density (g mL-1)	Mass (g)
Reactant C		3,5-Nitrobenzoic acid	24.4	212.17	1	0.115002			PPh3	262.29	36.1967	THF	287.5	0.889	255.588						0
		Benzyl alcohol	14.9236	108.14	1.2	0.138003			DEAD	174.16	24.0345				0						0
		Total	39.3236	320.31		0.253005		0			60.2312				255.588		0				0
										Yield (%)	90
										AE (%)	94.3586						mass (g)	MW	mol
										RME (%)	79.5513					Product	31.2824	302.24	0.103502
										MI total (g g-1)	11.3528
										MI RRC (g g-1)	3.18245
										MI Solvents (g g-1)	8.17032
		METRICS
		Reactant (Limiting Reactant First)	Mass (g)	MW (g mmol-1)	equiv	Mol	Catalyst	Mass (g)	Reagent	MW (g mmol-1)	Mass (g)	Reaction Solvent	Volume (mL)	Density (g.mL-1)	Mass (g)	Work up Chemical	Mass (g)	Workup Solvent	Volume (mL)	Density (g mL-1)	Mass (g)
Reactant D		(2E)-3-[2-chloro-4-(cyclopentyloxy)-5-methoxyphenyl]acrylic acid	35.7385	310.77	1	0.115			PPh3	262.29	36.196	THF	287.5	0.889	255.588						0
		Benzyl alcohol	14.9233	108.14	1.2	0.138			DEAD	174.16	24.0341				0						0
		Total	50.6619	418.91		0.253		0			60.2301				255.588		0				0
										Yield (%)	90
										AE (%)	95.7007						mass (g)	MW	mol
										RME (%)	81.9021					Product	41.4931	400.9	0.1035
										MI total (g g-1)	8.83229
										MI RRC (g g-1)	2.67254
										MI Solvents (g g-1)	6.15975
		METRICS
		Reactant (Limiting Reactant First)	Mass (g)	MW (g mmol-1)	equiv	Mol	Catalyst	Mass (g)	Reagent	MW (g mmol-1)	Mass (g)	Reaction Solvent	Volume (mL)	Density (g.mL-1)	Mass (g)	Work up Chemical	Mass (g)	Workup Solvent	Volume (mL)	Density (g mL-1)	Mass (g)
Reactant E		Fmoc-D-Dab(Boc)-OH	50.6575	440.5	1	0.115			PPh3	262.29	36.196	THF	287.5	0.889	255.588						0
		Benzyl alcohol	14.9233	108.14	1.2	0.138			DEAD	174.16	24.0341				0						0
		Total	65.5808	548.64		0.253		0			60.2301				255.588		0				0
										Yield (%)	90
										AE (%)	96.7155						mass (g)	MW	mol
										RME (%)	83.7427					Product	54.9192	530.62	0.1035
										MI total (g g-1)	6.94472
										MI RRC (g g-1)	2.29084
										MI Solvents (g g-1)	4.65388
Simulation 6: DEAD/PPh3 1.2 eq, Conc 0.8 M, yield of 90%
		METRICS
		Reactant (Limiting Reactant First)	Mass (g)	MW (g mmol-1)	equiv	Mol	Catalyst	Mass (g)	Reagent	MW (g mmol-1)	Mass (g)	Reaction Solvent	Volume (mL)	Density (g.mL-1)	Mass (g)	Work up Chemical	Mass (g)	Workup Solvent	Volume (mL)	Density (g mL-1)	Mass (g)
Reactant A		Benzoic acid	2.80876	122.12	1	0.023			PPh3	262.29	7.2392	THF	28.7	0.889	25.5143						0
		Benzyl alcohol	2.98466	108.14	1.2	0.0276			DEAD	174.16	4.80682				0						0
		Total	5.79342	230.26		0.0506		0			12.046				25.5143		0				0
										Yield (%)	90
										AE (%)	92.1784						mass (g)	MW	mol
										RME (%)	75.8373					Product	4.39358	212.25	0.0207
										MI total (g g-1)	9.86753
										MI RRC (g g-1)	4.06035
										MI Solvents (g g-1)	5.80718		Conc (M)	0.801394
		METRICS
		Reactant (Limiting Reactant First)	Mass (g)	MW (g mmol-1)	equiv	Mol	Catalyst	Mass (g)	Reagent	MW (g mmol-1)	Mass (g)	Reaction Solvent	Volume (mL)	Density (g.mL-1)	Mass (g)	Work up Chemical	Mass (g)	Workup Solvent	Volume (mL)	Density (g mL-1)	Mass (g)
Reactant B		4-Chlorobenzoic acid	3.60111	156.57	1	0.023			PPh3	262.29	7.2392	THF	28.7	0.889	25.5143						0
		Benzyl alcohol	2.98466	108.14	1.2	0.0276			DEAD	174.16	4.80682				0						0
		Total	6.58577	264.71		0.0506		0			12.046				25.5143		0				0
										Yield (%)	90
										AE (%)	93.1926						mass (g)	MW	mol
										RME (%)	77.5381					Product	5.10648	246.69	0.0207
										MI total (g g-1)	8.64511
										MI RRC (g g-1)	3.64865
										MI Solvents (g g-1)	4.99645
		METRICS
		Reactant (Limiting Reactant First)	Mass (g)	MW (g mmol-1)	equiv	Mol	Catalyst	Mass (g)	Reagent	MW (g mmol-1)	Mass (g)	Reaction Solvent	Volume (mL)	Density (g.mL-1)	Mass (g)	Work up Chemical	Mass (g)	Workup Solvent	Volume (mL)	Density (g mL-1)	Mass (g)
Reactant C		3,5-Nitrobenzoic acid	4.87991	212.17	1	0.023			PPh3	262.29	7.2392	THF	28.7	0.889	25.5143						0
		Benzyl alcohol	2.98466	108.14	1.2	0.0276			DEAD	174.16	4.80682				0						0
		Total	7.86457	320.31		0.0506		0			12.046				25.5143		0				0
										Yield (%)	90
										AE (%)	94.3586						mass (g)	MW	mol
										RME (%)	79.5513					Product	6.25637	302.24	0.0207
										MI total (g g-1)	7.26059
										MI RRC (g g-1)	3.18245
										MI Solvents (g g-1)	4.07813
		METRICS
		Reactant (Limiting Reactant First)	Mass (g)	MW (g mmol-1)	equiv	Mol	Catalyst	Mass (g)	Reagent	MW (g mmol-1)	Mass (g)	Reaction Solvent	Volume (mL)	Density (g.mL-1)	Mass (g)	Work up Chemical	Mass (g)	Workup Solvent	Volume (mL)	Density (g mL-1)	Mass (g)
Reactant D		(2E)-3-[2-chloro-4-(cyclopentyloxy)-5-methoxyphenyl]acrylic acid	7.14771	310.77	1	0.023			PPh3	262.29	7.2392	THF	28.7	0.889	25.5143						0
		Benzyl alcohol	2.98466	108.14	1.2	0.0276			DEAD	174.16	4.80682				0						0
		Total	10.1324	418.91		0.0506		0			12.046				25.5143		0				0
										Yield (%)	90
										AE (%)	95.7007						mass (g)	MW	mol
										RME (%)	81.9021					Product	8.29863	400.9	0.0207
										MI total (g g-1)	5.74706
										MI RRC (g g-1)	2.67254
										MI Solvents (g g-1)	3.07452
		METRICS
		Reactant (Limiting Reactant First)	Mass (g)	MW (g mmol-1)	equiv	Mol	Catalyst	Mass (g)	Reagent	MW (g mmol-1)	Mass (g)	Reaction Solvent	Volume (mL)	Density (g.mL-1)	Mass (g)	Work up Chemical	Mass (g)	Workup Solvent	Volume (mL)	Density (g mL-1)	Mass (g)
Reactant E		Fmoc-D-Dab(Boc)-OH	10.1315	440.5	1	0.023			PPh3	262.29	7.2392	THF	28.7	0.889	25.5143						0
		Benzyl alcohol	2.98466	108.14	1.2	0.0276			DEAD	174.16	4.80682				0						0
		Total	13.1162	548.64		0.0506		0			12.046				25.5143		0				0
										Yield (%)	90
										AE (%)	96.7155						mass (g)	MW	mol
										RME (%)	83.7427					Product	10.9838	530.62	0.0207
										MI total (g g-1)	4.61373
										MI RRC (g g-1)	2.29084
										MI Solvents (g g-1)	2.3229
			Entry	Substrate	AE	RME	PMI	PMIRRC	PMIsolv
					(%)	(%)	(g g-1)	(g g-1)	(g g-1)
			Simulation 1: DEAD/PPh3 1.2 eq, Conc 0.4 M, yield of 90%
			1	A	92.1784	75.8373	15.695	4.06035	11.6346
			2	B	93.1926	77.5381	13.659	3.64865	10.0103
			3	C	94.3586	79.5513	11.3529	3.18245	8.17048
			4	D	95.7007	81.9021	8.83229	2.67254	6.15975
			5	E	96.7155	83.7427	6.94472	2.29084	4.65388
			Simulation 2: DEAD/PPh3 1.2 eq, Conc 0.4 M, yield of 80%
			1	A	92.1784	67.4109	17.6568	4.56789	13.0889
			2	B	93.1926	68.9227	15.3663	4.10474	11.2616
			3	C	94.3586	70.7122	12.772	3.58026	9.19178
			4	D	95.7007	72.8019	9.93632	3.0066	6.92972
			5	E	96.7155	74.438	7.81281	2.57719	5.23562
			Simulation 3: DEAD/PPh3 1.2 eq, Conc 0.4 M, yield of 70%
			1	A	92.1784	58.9845	20.1792	5.22045	14.9588
			2	B	93.1926	60.3074	17.5615	4.69113	12.8704
			3	C	94.3586	61.8732	14.5966	4.09172	10.5049
			4	D	95.7007	63.7017	11.3558	3.43612	7.91968
			5	E	96.7155	65.1332	8.92893	2.94536	5.98357
			Simulation 4: DEAD/PPh3 1.2 eq, Conc 0.4 M, yield of 50%
			1	A	92.1784	42.1318	28.2509	7.30863	20.9423
			2	B	93.1926	43.0767	24.5861	6.56758	18.0186
			3	C	94.3586	44.1951	20.4353	5.72841	14.7069
			4	D	95.7007	45.5012	15.8981	4.81057	11.0876
			5	E	96.7155	46.5237	12.5005	4.12351	8.37699
			Simulation 5: DEAD/PPh3 1.2 eq, Scale x5, Conc 0.4 M, yield of 90%
			1	A	92.1784	75.8373	15.6898	4.06035	11.6295
			2	B	93.1926	77.5381	13.6621	3.64865	10.0134
			3	C	94.3586	79.5513	11.3528	3.18245	8.17032
			4	D	95.7007	81.9021	8.83229	2.67254	6.15975
			5	E	96.7155	83.7427	6.94472	2.29084	4.65388
			Simulation 6: DEAD/PPh3 1.2 eq, Conc 0.8 M, yield of 90%
			1	A	92.1784	75.8373	9.86753	4.06035	5.80718
			2	B	93.1926	77.5381	8.64511	3.64865	4.99645
			3	C	94.3586	79.5513	7.26059	3.18245	4.07813
			4	D	95.7007	81.9021	5.74706	2.67254	3.07452
			5	E	96.7155	83.7427	4.61373	2.29084	2.3229

## Sheet:  DCPEAC A-E
Simulation 1: DCPEAC/PPh3 1.2 eq, Conc 0.4 M, yield of 90%
		METRICS
		Reactant (Limiting Reactant First)	Mass (g)	MW (g mmol-1)	equiv	Mol	Catalyst	Mass (g)	Reagent	MW (g mmol-1)	Mass (g)	Reaction Solvent	Volume (mL)	Density (g.mL-1)	Mass (g)	Work up Chemical	Mass (g)	Workup Solvent	Volume (mL)	Density (g mL-1)	Mass (g)
Reactant A		Benzoic acid	2.80876	122.12	1	0.023			PPh3	262.29	7.2392	THF	57.5	0.889	51.1175						0
		Benzyl alcohol	2.98466	108.14	1.2	0.0276			DCPEAC	247.08	6.81941				0						0
		Total	5.79342	230.26		0.0506		0			14.0586				51.1175		0				0
										Yield (%)	90
										AE (%)	92.1784						mass (g)	MW	mol
										RME (%)	75.8373					Product	4.39358	212.25	0.0207
										MI total (g g-1)	16.153
										MI RRC (g g-1)	4.51842
										MI Solvents (g g-1)	11.6346		Conc (M)	0.4
		METRICS
		Reactant (Limiting Reactant First)	Mass (g)	MW (g mmol-1)	equiv	Mol	Catalyst	Mass (g)	Reagent	MW (g mmol-1)	Mass (g)	Reaction Solvent	Volume (mL)	Density (g.mL-1)	Mass (g)	Work up Chemical	Mass (g)	Workup Solvent	Volume (mL)	Density (g mL-1)	Mass (g)
Reactant B		4-Chlorobenzoic acid	3.60111	156.57	1	0.023			PPh3	262.29	7.2392	THF	57.5	0.889	51.1175						0
		Benzyl alcohol	2.98466	108.14	1.2	0.0276			DCPEAC	247.08	6.81941				0						0
		Total	6.58577	264.71		0.0506		0			14.0586				51.1175		0				0
										Yield (%)	90
										AE (%)	93.1926						mass (g)	MW	mol
										RME (%)	77.5381					Product	5.10648	246.69	0.0207
										MI total (g g-1)	14.0531
										MI RRC (g g-1)	4.04278
										MI Solvents (g g-1)	10.0103
		METRICS
		Reactant (Limiting Reactant First)	Mass (g)	MW (g mmol-1)	equiv	Mol	Catalyst	Mass (g)	Reagent	MW (g mmol-1)	Mass (g)	Reaction Solvent	Volume (mL)	Density (g.mL-1)	Mass (g)	Work up Chemical	Mass (g)	Workup Solvent	Volume (mL)	Density (g mL-1)	Mass (g)
Reactant C		3,5-Nitrobenzoic acid	4.87991	212.17	1	0.023			PPh3	262.29	7.2392	THF	57.5	0.889	51.1175						0
		Benzyl alcohol	2.98466	108.14	1.2	0.0276			DCPEAC	247.08	6.81941				0						0
		Total	7.86457	320.31		0.0506		0			14.0586				51.1175		0				0
										Yield (%)	90
										AE (%)	94.3586						mass (g)	MW	mol
										RME (%)	79.5513					Product	6.25637	302.24	0.0207
										MI total (g g-1)	11.6746
										MI RRC (g g-1)	3.50414
										MI Solvents (g g-1)	8.17048
		METRICS
		Reactant (Limiting Reactant First)	Mass (g)	MW (g mmol-1)	equiv	Mol	Catalyst	Mass (g)	Reagent	MW (g mmol-1)	Mass (g)	Reaction Solvent	Volume (mL)	Density (g.mL-1)	Mass (g)	Work up Chemical	Mass (g)	Workup Solvent	Volume (mL)	Density (g mL-1)	Mass (g)
Reactant D		(2E)-3-[2-chloro-4-(cyclopentyloxy)-5-methoxyphenyl]acrylic acid	7.14771	310.77	1	0.023			PPh3	262.29	7.2392	THF	57.5	0.889	51.1175						0
		Benzyl alcohol	2.98466	108.14	1.2	0.0276			DCPEAC	247.08	6.81941				0						0
		Total	10.1324	418.91		0.0506		0			14.0586				51.1175		0				0
										Yield (%)	90
										AE (%)	95.7007						mass (g)	MW	mol
										RME (%)	81.9021					Product	8.29863	400.9	0.0207
										MI total (g g-1)	9.07481
										MI RRC (g g-1)	2.91506
										MI Solvents (g g-1)	6.15975
		METRICS
		Reactant (Limiting Reactant First)	Mass (g)	MW (g mmol-1)	equiv	Mol	Catalyst	Mass (g)	Reagent	MW (g mmol-1)	Mass (g)	Reaction Solvent	Volume (mL)	Density (g.mL-1)	Mass (g)	Work up Chemical	Mass (g)	Workup Solvent	Volume (mL)	Density (g mL-1)	Mass (g)
Reactant E		Fmoc-D-Dab(Boc)-OH	10.1315	440.5	1	0.023			PPh3	262.29	7.2392	THF	57.5	0.889	51.1175						0
		Benzyl alcohol	2.98466	108.14	1.2	0.0276			DCPEAC	247.08	6.81941				0						0
		Total	13.1162	548.64		0.0506		0			14.0586				51.1175		0				0
										Yield (%)	90
										AE (%)	96.7155						mass (g)	MW	mol
										RME (%)	83.7427					Product	10.9838	530.62	0.0207
										MI total (g g-1)	7.12796
										MI RRC (g g-1)	2.47407
										MI Solvents (g g-1)	4.65388
Simulation 2: DCPEAC/PPh3 1.2 eq, Conc 0.4 M, yield of 80%
		METRICS
		Reactant (Limiting Reactant First)	Mass (g)	MW (g mmol-1)	equiv	Mol	Catalyst	Mass (g)	Reagent	MW (g mmol-1)	Mass (g)	Reaction Solvent	Volume (mL)	Density (g.mL-1)	Mass (g)	Work up Chemical	Mass (g)	Workup Solvent	Volume (mL)	Density (g mL-1)	Mass (g)
Reactant A		Benzoic acid	2.80876	122.12	1	0.023			PPh3	262.29	7.2392	THF	57.5	0.889	51.1175						0
		Benzyl alcohol	2.98466	108.14	1.2	0.0276			DCPEAC	247.08	6.81941				0						0
		Total	5.79342	230.26		0.0506		0			14.0586				51.1175		0				0
										Yield (%)	80
										AE (%)	92.1784						mass (g)	MW	mol
										RME (%)	67.4109					Product	3.9054	212.25	0.0184
										MI total (g g-1)	18.1722
										MI RRC (g g-1)	5.08323
										MI Solvents (g g-1)	13.0889		Conc (M)	0.4
		METRICS
		Reactant (Limiting Reactant First)	Mass (g)	MW (g mmol-1)	equiv	Mol	Catalyst	Mass (g)	Reagent	MW (g mmol-1)	Mass (g)	Reaction Solvent	Volume (mL)	Density (g.mL-1)	Mass (g)	Work up Chemical	Mass (g)	Workup Solvent	Volume (mL)	Density (g mL-1)	Mass (g)
Reactant B		4-Chlorobenzoic acid	3.60111	156.57	1	0.023			PPh3	262.29	7.2392	THF	57.5	0.889	51.1175						0
		Benzyl alcohol	2.98466	108.14	1.2	0.0276			DCPEAC	247.08	6.81941				0						0
		Total	6.58577	264.71		0.0506		0			14.0586				51.1175		0				0
										Yield (%)	80
										AE (%)	93.1926						mass (g)	MW	mol
										RME (%)	68.9227					Product	4.5391	246.69	0.0184
										MI total (g g-1)	15.8097
										MI RRC (g g-1)	4.54813
										MI Solvents (g g-1)	11.2616
		METRICS
		Reactant (Limiting Reactant First)	Mass (g)	MW (g mmol-1)	equiv	Mol	Catalyst	Mass (g)	Reagent	MW (g mmol-1)	Mass (g)	Reaction Solvent	Volume (mL)	Density (g.mL-1)	Mass (g)	Work up Chemical	Mass (g)	Workup Solvent	Volume (mL)	Density (g mL-1)	Mass (g)
Reactant C		3,5-Nitrobenzoic acid	4.87991	212.17	1	0.023			PPh3	262.29	7.2392	THF	57.5	0.889	51.1175						0
		Benzyl alcohol	2.98466	108.14	1.2	0.0276			DCPEAC	247.08	6.81941				0						0
		Total	7.86457	320.31		0.0506		0			14.0586				51.1175		0				0
										Yield (%)	80
										AE (%)	94.3586						mass (g)	MW	mol
										RME (%)	70.7122					Product	5.56122	302.24	0.0184
										MI total (g g-1)	13.1339
										MI RRC (g g-1)	3.94216
										MI Solvents (g g-1)	9.19178
		METRICS
		Reactant (Limiting Reactant First)	Mass (g)	MW (g mmol-1)	equiv	Mol	Catalyst	Mass (g)	Reagent	MW (g mmol-1)	Mass (g)	Reaction Solvent	Volume (mL)	Density (g.mL-1)	Mass (g)	Work up Chemical	Mass (g)	Workup Solvent	Volume (mL)	Density (g mL-1)	Mass (g)
Reactant D		(2E)-3-[2-chloro-4-(cyclopentyloxy)-5-methoxyphenyl]acrylic acid	7.14771	310.77	1	0.023			PPh3	262.29	7.2392	THF	57.5	0.889	51.1175						0
		Benzyl alcohol	2.98466	108.14	1.2	0.0276			DCPEAC	247.08	6.81941				0						0
		Total	10.1324	418.91		0.0506		0			14.0586				51.1175		0				0
										Yield (%)	80
										AE (%)	95.7007						mass (g)	MW	mol
										RME (%)	72.8019					Product	7.37656	400.9	0.0184
										MI total (g g-1)	10.2092
										MI RRC (g g-1)	3.27944
										MI Solvents (g g-1)	6.92972
		METRICS
		Reactant (Limiting Reactant First)	Mass (g)	MW (g mmol-1)	equiv	Mol	Catalyst	Mass (g)	Reagent	MW (g mmol-1)	Mass (g)	Reaction Solvent	Volume (mL)	Density (g.mL-1)	Mass (g)	Work up Chemical	Mass (g)	Workup Solvent	Volume (mL)	Density (g mL-1)	Mass (g)
Reactant E		Fmoc-D-Dab(Boc)-OH	10.1315	440.5	1	0.023			PPh3	262.29	7.2392	THF	57.5	0.889	51.1175						0
		Benzyl alcohol	2.98466	108.14	1.2	0.0276			DCPEAC	247.08	6.81941				0						0
		Total	13.1162	548.64		0.0506		0			14.0586				51.1175		0				0
										Yield (%)	80
										AE (%)	96.7155						mass (g)	MW	mol
										RME (%)	74.438					Product	9.76341	530.62	0.0184
										MI total (g g-1)	8.01895
										MI RRC (g g-1)	2.78333
										MI Solvents (g g-1)	5.23562
Simulation 3: DCPEAC/PPh3 1.2 eq, Conc 0.4 M, yield of 70%
		METRICS
		Reactant (Limiting Reactant First)	Mass (g)	MW (g mmol-1)	equiv	Mol	Catalyst	Mass (g)	Reagent	MW (g mmol-1)	Mass (g)	Reaction Solvent	Volume (mL)	Density (g.mL-1)	Mass (g)	Work up Chemical	Mass (g)	Workup Solvent	Volume (mL)	Density (g mL-1)	Mass (g)
Reactant A		Benzoic acid	2.80876	122.12	1	0.023			PPh3	262.29	7.2392	THF	57.5	0.889	51.1175						0
		Benzyl alcohol	2.98466	108.14	1.2	0.0276			DCPEAC	247.08	6.81941				0						0
		Total	5.79342	230.26		0.0506		0			14.0586				51.1175		0				0
										Yield (%)	70
										AE (%)	92.1784						mass (g)	MW	mol
										RME (%)	58.9845					Product	3.41722	212.25	0.0161
										MI total (g g-1)	20.7682
										MI RRC (g g-1)	5.8094
										MI Solvents (g g-1)	14.9588		Conc (M)	0.4
		METRICS
		Reactant (Limiting Reactant First)	Mass (g)	MW (g mmol-1)	equiv	Mol	Catalyst	Mass (g)	Reagent	MW (g mmol-1)	Mass (g)	Reaction Solvent	Volume (mL)	Density (g.mL-1)	Mass (g)	Work up Chemical	Mass (g)	Workup Solvent	Volume (mL)	Density (g mL-1)	Mass (g)
Reactant B		4-Chlorobenzoic acid	3.60111	156.57	1	0.023			PPh3	262.29	7.2392	THF	57.5	0.889	51.1175						0
		Benzyl alcohol	2.98466	108.14	1.2	0.0276			DCPEAC	247.08	6.81941				0						0
		Total	6.58577	264.71		0.0506		0			14.0586				51.1175		0				0
										Yield (%)	70
										AE (%)	93.1926						mass (g)	MW	mol
										RME (%)	60.3074					Product	3.97171	246.69	0.0161
										MI total (g g-1)	18.0683
										MI RRC (g g-1)	5.19786
										MI Solvents (g g-1)	12.8704
		METRICS
		Reactant (Limiting Reactant First)	Mass (g)	MW (g mmol-1)	equiv	Mol	Catalyst	Mass (g)	Reagent	MW (g mmol-1)	Mass (g)	Reaction Solvent	Volume (mL)	Density (g.mL-1)	Mass (g)	Work up Chemical	Mass (g)	Workup Solvent	Volume (mL)	Density (g mL-1)	Mass (g)
Reactant C		3,5-Nitrobenzoic acid	4.87991	212.17	1	0.023			PPh3	262.29	7.2392	THF	57.5	0.889	51.1175						0
		Benzyl alcohol	2.98466	108.14	1.2	0.0276			DCPEAC	247.08	6.81941				0						0
		Total	7.86457	320.31		0.0506		0			14.0586				51.1175		0				0
										Yield (%)	70
										AE (%)	94.3586						mass (g)	MW	mol
										RME (%)	61.8732					Product	4.86606	302.24	0.0161
										MI total (g g-1)	15.0102
										MI RRC (g g-1)	4.50532
										MI Solvents (g g-1)	10.5049
		METRICS
		Reactant (Limiting Reactant First)	Mass (g)	MW (g mmol-1)	equiv	Mol	Catalyst	Mass (g)	Reagent	MW (g mmol-1)	Mass (g)	Reaction Solvent	Volume (mL)	Density (g.mL-1)	Mass (g)	Work up Chemical	Mass (g)	Workup Solvent	Volume (mL)	Density (g mL-1)	Mass (g)
Reactant D		(2E)-3-[2-chloro-4-(cyclopentyloxy)-5-methoxyphenyl]acrylic acid	7.14771	310.77	1	0.023			PPh3	262.29	7.2392	THF	57.5	0.889	51.1175						0
		Benzyl alcohol	2.98466	108.14	1.2	0.0276			DCPEAC	247.08	6.81941				0						0
		Total	10.1324	418.91		0.0506		0			14.0586				51.1175		0				0
										Yield (%)	70
										AE (%)	95.7007						mass (g)	MW	mol
										RME (%)	63.7017					Product	6.45449	400.9	0.0161
										MI total (g g-1)	11.6676
										MI RRC (g g-1)	3.74793
										MI Solvents (g g-1)	7.91968
		METRICS
		Reactant (Limiting Reactant First)	Mass (g)	MW (g mmol-1)	equiv	Mol	Catalyst	Mass (g)	Reagent	MW (g mmol-1)	Mass (g)	Reaction Solvent	Volume (mL)	Density (g.mL-1)	Mass (g)	Work up Chemical	Mass (g)	Workup Solvent	Volume (mL)	Density (g mL-1)	Mass (g)
Reactant E		Fmoc-D-Dab(Boc)-OH	10.1315	440.5	1	0.023			PPh3	262.29	7.2392	THF	57.5	0.889	51.1175						0
		Benzyl alcohol	2.98466	108.14	1.2	0.0276			DCPEAC	247.08	6.81941				0						0
		Total	13.1162	548.64		0.0506		0			14.0586				51.1175		0				0
										Yield (%)	70
										AE (%)	96.7155						mass (g)	MW	mol
										RME (%)	65.1332					Product	8.54298	530.62	0.0161
										MI total (g g-1)	9.16451
										MI RRC (g g-1)	3.18095
										MI Solvents (g g-1)	5.98357
Simulation 4: DCPEAC/PPh3 1.2 eq, Conc 0.4 M, yield of 50%
		METRICS
		Reactant (Limiting Reactant First)	Mass (g)	MW (g mmol-1)	equiv	Mol	Catalyst	Mass (g)	Reagent	MW (g mmol-1)	Mass (g)	Reaction Solvent	Volume (mL)	Density (g.mL-1)	Mass (g)	Work up Chemical	Mass (g)	Workup Solvent	Volume (mL)	Density (g mL-1)	Mass (g)
Reactant A		Benzoic acid	2.80876	122.12	1	0.023			PPh3	262.29	7.2392	THF	57.5	0.889	51.1175						0
		Benzyl alcohol	2.98466	108.14	1.2	0.0276			DCPEAC	247.08	6.81941				0						0
		Total	5.79342	230.26		0.0506		0			14.0586				51.1175		0				0
										Yield (%)	50
										AE (%)	92.1784						mass (g)	MW	mol
										RME (%)	42.1318					Product	2.44088	212.25	0.0115
										MI total (g g-1)	29.0754
										MI RRC (g g-1)	8.13316
										MI Solvents (g g-1)	20.9423		Conc (M)	0.4
		METRICS
		Reactant (Limiting Reactant First)	Mass (g)	MW (g mmol-1)	equiv	Mol	Catalyst	Mass (g)	Reagent	MW (g mmol-1)	Mass (g)	Reaction Solvent	Volume (mL)	Density (g.mL-1)	Mass (g)	Work up Chemical	Mass (g)	Workup Solvent	Volume (mL)	Density (g mL-1)	Mass (g)
Reactant B		4-Chlorobenzoic acid	3.60111	156.57	1	0.023			PPh3	262.29	7.2392	THF	57.5	0.889	51.1175						0
		Benzyl alcohol	2.98466	108.14	1.2	0.0276			DCPEAC	247.08	6.81941				0						0
		Total	6.58577	264.71		0.0506		0			14.0586				51.1175		0				0
										Yield (%)	50
										AE (%)	93.1926						mass (g)	MW	mol
										RME (%)	43.0767					Product	2.83693	246.69	0.0115
										MI total (g g-1)	25.2956
										MI RRC (g g-1)	7.277
										MI Solvents (g g-1)	18.0186
		METRICS
		Reactant (Limiting Reactant First)	Mass (g)	MW (g mmol-1)	equiv	Mol	Catalyst	Mass (g)	Reagent	MW (g mmol-1)	Mass (g)	Reaction Solvent	Volume (mL)	Density (g.mL-1)	Mass (g)	Work up Chemical	Mass (g)	Workup Solvent	Volume (mL)	Density (g mL-1)	Mass (g)
Reactant C		3,5-Nitrobenzoic acid	4.87991	212.17	1	0.023			PPh3	262.29	7.2392	THF	57.5	0.889	51.1175						0
		Benzyl alcohol	2.98466	108.14	1.2	0.0276			DCPEAC	247.08	6.81941				0						0
		Total	7.86457	320.31		0.0506		0			14.0586				51.1175		0				0
										Yield (%)	50
										AE (%)	94.3586						mass (g)	MW	mol
										RME (%)	44.1951					Product	3.47576	302.24	0.0115
										MI total (g g-1)	21.0143
										MI RRC (g g-1)	6.30745
										MI Solvents (g g-1)	14.7069
		METRICS
		Reactant (Limiting Reactant First)	Mass (g)	MW (g mmol-1)	equiv	Mol	Catalyst	Mass (g)	Reagent	MW (g mmol-1)	Mass (g)	Reaction Solvent	Volume (mL)	Density (g.mL-1)	Mass (g)	Work up Chemical	Mass (g)	Workup Solvent	Volume (mL)	Density (g mL-1)	Mass (g)
Reactant D		(2E)-3-[2-chloro-4-(cyclopentyloxy)-5-methoxyphenyl]acrylic acid	7.14771	310.77	1	0.023			PPh3	262.29	7.2392	THF	57.5	0.889	51.1175						0
		Benzyl alcohol	2.98466	108.14	1.2	0.0276			DCPEAC	247.08	6.81941				0						0
		Total	10.1324	418.91		0.0506		0			14.0586				51.1175		0				0
										Yield (%)	50
										AE (%)	95.7007						mass (g)	MW	mol
										RME (%)	45.5012					Product	4.61035	400.9	0.0115
										MI total (g g-1)	16.3347
										MI RRC (g g-1)	5.2471
										MI Solvents (g g-1)	11.0876
		METRICS
		Reactant (Limiting Reactant First)	Mass (g)	MW (g mmol-1)	equiv	Mol	Catalyst	Mass (g)	Reagent	MW (g mmol-1)	Mass (g)	Reaction Solvent	Volume (mL)	Density (g.mL-1)	Mass (g)	Work up Chemical	Mass (g)	Workup Solvent	Volume (mL)	Density (g mL-1)	Mass (g)
Reactant E		Fmoc-D-Dab(Boc)-OH	10.1315	440.5	1	0.023			PPh3	262.29	7.2392	THF	57.5	0.889	51.1175						0
		Benzyl alcohol	2.98466	108.14	1.2	0.0276			DCPEAC	247.08	6.81941				0						0
		Total	13.1162	548.64		0.0506		0			14.0586				51.1175		0				0
										Yield (%)	50
										AE (%)	96.7155						mass (g)	MW	mol
										RME (%)	46.5237					Product	6.10213	530.62	0.0115
										MI total (g g-1)	12.8303
										MI RRC (g g-1)	4.45333
										MI Solvents (g g-1)	8.37699
Simulation 5: DCPEAC/PPh3 1.2 eq, Scale x5, Conc 0.4 M, yield of 90%
		METRICS
		Reactant (Limiting Reactant First)	Mass (g)	MW (g mmol-1)	equiv	Mol	Catalyst	Mass (g)	Reagent	MW (g mmol-1)	Mass (g)	Reaction Solvent	Volume (mL)	Density (g.mL-1)	Mass (g)	Work up Chemical	Mass (g)	Workup Solvent	Volume (mL)	Density (g mL-1)	Mass (g)
Reactant A		Benzoic acid	14.05	122.12	1	0.115051			PPh3	262.29	36.212	THF	287.5	0.889	255.588						0
		Benzyl alcohol	14.9299	108.14	1.2	0.138061			DCPEAC	247.08	34.1121				0						0
		Total	28.9799	230.26		0.253112		0			70.3241				255.588		0				0
										Yield (%)	90
										AE (%)	92.1784						mass (g)	MW	mol
										RME (%)	75.8373					Product	21.9776	212.25	0.103546
										MI total (g g-1)	16.1479
										MI RRC (g g-1)	4.51842
										MI Solvents (g g-1)	11.6295		Conc (M)	0.400177
		METRICS
		Reactant (Limiting Reactant First)	Mass (g)	MW (g mmol-1)	equiv	Mol	Catalyst	Mass (g)	Reagent	MW (g mmol-1)	Mass (g)	Reaction Solvent	Volume (mL)	Density (g.mL-1)	Mass (g)	Work up Chemical	Mass (g)	Workup Solvent	Volume (mL)	Density (g mL-1)	Mass (g)
Reactant B		4-Chlorobenzoic acid	18	156.57	1	0.114965			PPh3	262.29	36.1849	THF	287.5	0.889	255.588						0
		Benzyl alcohol	14.9187	108.14	1.2	0.137957			DCPEAC	247.08	34.0865				0						0
		Total	32.9187	264.71		0.252922		0			70.2714				255.588		0				0
										Yield (%)	90
										AE (%)	93.1926						mass (g)	MW	mol
										RME (%)	77.5381					Product	25.5245	246.69	0.103468
										MI total (g g-1)	14.0562
										MI RRC (g g-1)	4.04278
										MI Solvents (g g-1)	10.0134
		METRICS
		Reactant (Limiting Reactant First)	Mass (g)	MW (g mmol-1)	equiv	Mol	Catalyst	Mass (g)	Reagent	MW (g mmol-1)	Mass (g)	Reaction Solvent	Volume (mL)	Density (g.mL-1)	Mass (g)	Work up Chemical	Mass (g)	Workup Solvent	Volume (mL)	Density (g mL-1)	Mass (g)
Reactant C		3,5-Nitrobenzoic acid	24.4	212.17	1	0.115002			PPh3	262.29	36.1967	THF	287.5	0.889	255.588						0
		Benzyl alcohol	14.9236	108.14	1.2	0.138003			DCPEAC	247.08	34.0977				0						0
		Total	39.3236	320.31		0.253005		0			70.2944				255.588		0				0
										Yield (%)	90
										AE (%)	94.3586						mass (g)	MW	mol
										RME (%)	79.5513					Product	31.2824	302.24	0.103502
										MI total (g g-1)	11.6745
										MI RRC (g g-1)	3.50414
										MI Solvents (g g-1)	8.17032
		METRICS
		Reactant (Limiting Reactant First)	Mass (g)	MW (g mmol-1)	equiv	Mol	Catalyst	Mass (g)	Reagent	MW (g mmol-1)	Mass (g)	Reaction Solvent	Volume (mL)	Density (g.mL-1)	Mass (g)	Work up Chemical	Mass (g)	Workup Solvent	Volume (mL)	Density (g mL-1)	Mass (g)
Reactant D		(2E)-3-[2-chloro-4-(cyclopentyloxy)-5-methoxyphenyl]acrylic acid	35.7385	310.77	1	0.115			PPh3	262.29	36.196	THF	287.5	0.889	255.588						0
		Benzyl alcohol	14.9233	108.14	1.2	0.138			DCPEAC	247.08	34.097				0						0
		Total	50.6619	418.91		0.253		0			70.2931				255.588		0				0
										Yield (%)	90
										AE (%)	95.7007						mass (g)	MW	mol
										RME (%)	81.9021					Product	41.4931	400.9	0.1035
										MI total (g g-1)	9.07481
										MI RRC (g g-1)	2.91506
										MI Solvents (g g-1)	6.15975
		METRICS
		Reactant (Limiting Reactant First)	Mass (g)	MW (g mmol-1)	equiv	Mol	Catalyst	Mass (g)	Reagent	MW (g mmol-1)	Mass (g)	Reaction Solvent	Volume (mL)	Density (g.mL-1)	Mass (g)	Work up Chemical	Mass (g)	Workup Solvent	Volume (mL)	Density (g mL-1)	Mass (g)
Reactant E		Fmoc-D-Dab(Boc)-OH	50.6575	440.5	1	0.115			PPh3	262.29	36.196	THF	287.5	0.889	255.588						0
		Benzyl alcohol	14.9233	108.14	1.2	0.138			DCPEAC	247.08	34.097				0						0
		Total	65.5808	548.64		0.253		0			70.2931				255.588		0				0
										Yield (%)	90
										AE (%)	96.7155						mass (g)	MW	mol
										RME (%)	83.7427					Product	54.9192	530.62	0.1035
										MI total (g g-1)	7.12796
										MI RRC (g g-1)	2.47407
										MI Solvents (g g-1)	4.65388
Simulation 6: DCPEAC/PPh3 1.2 eq, Conc 0.8 M, yield of 90%
		METRICS
		Reactant (Limiting Reactant First)	Mass (g)	MW (g mmol-1)	equiv	Mol	Catalyst	Mass (g)	Reagent	MW (g mmol-1)	Mass (g)	Reaction Solvent	Volume (mL)	Density (g.mL-1)	Mass (g)	Work up Chemical	Mass (g)	Workup Solvent	Volume (mL)	Density (g mL-1)	Mass (g)
Reactant A		Benzoic acid	2.80876	122.12	1	0.023			PPh3	262.29	7.2392	THF	28.7	0.889	25.5143						0
		Benzyl alcohol	2.98466	108.14	1.2	0.0276			DCPEAC	247.08	6.81941				0						0
		Total	5.79342	230.26		0.0506		0			14.0586				25.5143		0				0
										Yield (%)	90
										AE (%)	92.1784						mass (g)	MW	mol
										RME (%)	75.8373					Product	4.39358	212.25	0.0207
										MI total (g g-1)	10.3256
										MI RRC (g g-1)	4.51842
										MI Solvents (g g-1)	5.80718		Conc (M)	0.801394
		METRICS
		Reactant (Limiting Reactant First)	Mass (g)	MW (g mmol-1)	equiv	Mol	Catalyst	Mass (g)	Reagent	MW (g mmol-1)	Mass (g)	Reaction Solvent	Volume (mL)	Density (g.mL-1)	Mass (g)	Work up Chemical	Mass (g)	Workup Solvent	Volume (mL)	Density (g mL-1)	Mass (g)
Reactant B		4-Chlorobenzoic acid	3.60111	156.57	1	0.023			PPh3	262.29	7.2392	THF	28.7	0.889	25.5143						0
		Benzyl alcohol	2.98466	108.14	1.2	0.0276			DCPEAC	247.08	6.81941				0						0
		Total	6.58577	264.71		0.0506		0			14.0586				25.5143		0				0
										Yield (%)	90
										AE (%)	93.1926						mass (g)	MW	mol
										RME (%)	77.5381					Product	5.10648	246.69	0.0207
										MI total (g g-1)	9.03923
										MI RRC (g g-1)	4.04278
										MI Solvents (g g-1)	4.99645
		METRICS
		Reactant (Limiting Reactant First)	Mass (g)	MW (g mmol-1)	equiv	Mol	Catalyst	Mass (g)	Reagent	MW (g mmol-1)	Mass (g)	Reaction Solvent	Volume (mL)	Density (g.mL-1)	Mass (g)	Work up Chemical	Mass (g)	Workup Solvent	Volume (mL)	Density (g mL-1)	Mass (g)
Reactant C		3,5-Nitrobenzoic acid	4.87991	212.17	1	0.023			PPh3	262.29	7.2392	THF	28.7	0.889	25.5143						0
		Benzyl alcohol	2.98466	108.14	1.2	0.0276			DCPEAC	247.08	6.81941				0						0
		Total	7.86457	320.31		0.0506		0			14.0586				25.5143		0				0
										Yield (%)	90
										AE (%)	94.3586						mass (g)	MW	mol
										RME (%)	79.5513					Product	6.25637	302.24	0.0207
										MI total (g g-1)	7.58227
										MI RRC (g g-1)	3.50414
										MI Solvents (g g-1)	4.07813
		METRICS
		Reactant (Limiting Reactant First)	Mass (g)	MW (g mmol-1)	equiv	Mol	Catalyst	Mass (g)	Reagent	MW (g mmol-1)	Mass (g)	Reaction Solvent	Volume (mL)	Density (g.mL-1)	Mass (g)	Work up Chemical	Mass (g)	Workup Solvent	Volume (mL)	Density (g mL-1)	Mass (g)
Reactant D		(2E)-3-[2-chloro-4-(cyclopentyloxy)-5-methoxyphenyl]acrylic acid	7.14771	310.77	1	0.023			PPh3	262.29	7.2392	THF	28.7	0.889	25.5143						0
		Benzyl alcohol	2.98466	108.14	1.2	0.0276			DCPEAC	247.08	6.81941				0						0
		Total	10.1324	418.91		0.0506		0			14.0586				25.5143		0				0
										Yield (%)	90
										AE (%)	95.7007						mass (g)	MW	mol
										RME (%)	81.9021					Product	8.29863	400.9	0.0207
										MI total (g g-1)	5.98958
										MI RRC (g g-1)	2.91506
										MI Solvents (g g-1)	3.07452
		METRICS
		Reactant (Limiting Reactant First)	Mass (g)	MW (g mmol-1)	equiv	Mol	Catalyst	Mass (g)	Reagent	MW (g mmol-1)	Mass (g)	Reaction Solvent	Volume (mL)	Density (g.mL-1)	Mass (g)	Work up Chemical	Mass (g)	Workup Solvent	Volume (mL)	Density (g mL-1)	Mass (g)
Reactant E		Fmoc-D-Dab(Boc)-OH	10.1315	440.5	1	0.023			PPh3	262.29	7.2392	THF	28.7	0.889	25.5143						0
		Benzyl alcohol	2.98466	108.14	1.2	0.0276			DCPEAC	247.08	6.81941				0						0
		Total	13.1162	548.64		0.0506		0			14.0586				25.5143		0				0
										Yield (%)	90
										AE (%)	96.7155						mass (g)	MW	mol
										RME (%)	83.7427					Product	10.9838	530.62	0.0207
										MI total (g g-1)	4.79697
										MI RRC (g g-1)	2.47407
										MI Solvents (g g-1)	2.3229
			Entry	Substrate	AE	RME	PMI	PMIRRC	PMIsolv
					(%)	(%)	(g g-1)	(g g-1)	(g g-1)
			Simulation 1: DCPEAC/PPh3 1.2 eq, Conc 0.4 M, yield of 90%
			1	A	92.1784	75.8373	16.153	4.51842	11.6346
			2	B	93.1926	77.5381	14.0531	4.04278	10.0103
			3	C	94.3586	79.5513	11.6746	3.50414	8.17048
			4	D	95.7007	81.9021	9.07481	2.91506	6.15975
			5	E	96.7155	83.7427	7.12796	2.47407	4.65388
			Simulation 2: DCPEAC/PPh3 1.2 eq, Conc 0.4 M, yield of 80%
			1	A	92.1784	67.4109	18.1722	5.08323	13.0889
			2	B	93.1926	68.9227	15.8097	4.54813	11.2616
			3	C	94.3586	70.7122	13.1339	3.94216	9.19178
			4	D	95.7007	72.8019	10.2092	3.27944	6.92972
			5	E	96.7155	74.438	8.01895	2.78333	5.23562
			Simulation 3: DCPEAC/PPh3 1.2 eq, Conc 0.4 M, yield of 70%
			1	A	92.1784	58.9845	20.7682	5.8094	14.9588
			2	B	93.1926	60.3074	18.0683	5.19786	12.8704
			3	C	94.3586	61.8732	15.0102	4.50532	10.5049
			4	D	95.7007	63.7017	11.6676	3.74793	7.91968
			5	E	96.7155	65.1332	9.16451	3.18095	5.98357
			Simulation 4: DCPEAC/PPh3 1.2 eq, Conc 0.4 M, yield of 50%
			1	A	92.1784	42.1318	29.0754	8.13316	20.9423
			2	B	93.1926	43.0767	25.2956	7.277	18.0186
			3	C	94.3586	44.1951	21.0143	6.30745	14.7069
			4	D	95.7007	45.5012	16.3347	5.2471	11.0876
			5	E	96.7155	46.5237	12.8303	4.45333	8.37699
			Simulation 5: DCPEAC/PPh3 1.2 eq, Scale x5, Conc 0.4 M, yield of 90%
			1	A	92.1784	75.8373	16.1479	4.51842	11.6295
			2	B	93.1926	77.5381	14.0562	4.04278	10.0134
			3	C	94.3586	79.5513	11.6745	3.50414	8.17032
			4	D	95.7007	81.9021	9.07481	2.91506	6.15975
			5	E	96.7155	83.7427	7.12796	2.47407	4.65388
			Simulation 6: DCPEAC/PPh3 1.2 eq, Conc 0.8 M, yield of 90%
			1	A	92.1784	75.8373	10.3256	4.51842	5.80718
			2	B	93.1926	77.5381	9.03923	4.04278	4.99645
			3	C	94.3586	79.5513	7.58227	3.50414	4.07813
			4	D	95.7007	81.9021	5.98958	2.91506	3.07452
			5	E	96.7155	83.7427	4.79697	2.47407	2.3229

## Sheet:  DBPEAC A-E
Simulation 1: DBPEAC/PPh3 1.2 eq, Conc 0.4 M, yield of 90%
		METRICS
		Reactant (Limiting Reactant First)	Mass (g)	MW (g mmol-1)	equiv	Mol	Catalyst	Mass (g)	Reagent	MW (g mmol-1)	Mass (g)	Reaction Solvent	Volume (mL)	Density (g.mL-1)	Mass (g)	Work up Chemical	Mass (g)	Workup Solvent	Volume (mL)	Density (g mL-1)	Mass (g)
Reactant A		Benzoic acid	2.80876	122.12	1	0.023			PPh3	262.29	7.2392	THF	57.5	0.889	51.1175						0
		Benzyl alcohol	2.98466	108.14	1.2	0.0276			DBPEAC	335.98	9.27305				0						0
		Total	5.79342	230.26		0.0506		0			16.5123				51.1175		0				0
										Yield (%)	90
										AE (%)	92.1784						mass (g)	MW	mol
										RME (%)	75.8373					Product	4.39358	212.25	0.0207
										MI total (g g-1)	16.7115
										MI RRC (g g-1)	5.07689
										MI Solvents (g g-1)	11.6346		Conc (M)	0.4
		METRICS
		Reactant (Limiting Reactant First)	Mass (g)	MW (g mmol-1)	equiv	Mol	Catalyst	Mass (g)	Reagent	MW (g mmol-1)	Mass (g)	Reaction Solvent	Volume (mL)	Density (g.mL-1)	Mass (g)	Work up Chemical	Mass (g)	Workup Solvent	Volume (mL)	Density (g mL-1)	Mass (g)
Reactant B		4-Chlorobenzoic acid	3.60111	156.57	1	0.023			PPh3	262.29	7.2392	THF	57.5	0.889	51.1175						0
		Benzyl alcohol	2.98466	108.14	1.2	0.0276			DBPEAC	335.98	9.27305				0						0
		Total	6.58577	264.71		0.0506		0			16.5123				51.1175		0				0
										Yield (%)	90
										AE (%)	93.1926						mass (g)	MW	mol
										RME (%)	77.5381					Product	5.10648	246.69	0.0207
										MI total (g g-1)	14.5336
										MI RRC (g g-1)	4.52327
										MI Solvents (g g-1)	10.0103
		METRICS
		Reactant (Limiting Reactant First)	Mass (g)	MW (g mmol-1)	equiv	Mol	Catalyst	Mass (g)	Reagent	MW (g mmol-1)	Mass (g)	Reaction Solvent	Volume (mL)	Density (g.mL-1)	Mass (g)	Work up Chemical	Mass (g)	Workup Solvent	Volume (mL)	Density (g mL-1)	Mass (g)
Reactant C		3,5-Nitrobenzoic acid	4.87991	212.17	1	0.023			PPh3	262.29	7.2392	THF	57.5	0.889	51.1175						0
		Benzyl alcohol	2.98466	108.14	1.2	0.0276			DBPEAC	335.98	9.27305				0						0
		Total	7.86457	320.31		0.0506		0			16.5123				51.1175		0				0
										Yield (%)	90
										AE (%)	94.3586						mass (g)	MW	mol
										RME (%)	79.5513					Product	6.25637	302.24	0.0207
										MI total (g g-1)	12.0668
										MI RRC (g g-1)	3.89632
										MI Solvents (g g-1)	8.17048
		METRICS
		Reactant (Limiting Reactant First)	Mass (g)	MW (g mmol-1)	equiv	Mol	Catalyst	Mass (g)	Reagent	MW (g mmol-1)	Mass (g)	Reaction Solvent	Volume (mL)	Density (g.mL-1)	Mass (g)	Work up Chemical	Mass (g)	Workup Solvent	Volume (mL)	Density (g mL-1)	Mass (g)
Reactant D		(2E)-3-[2-chloro-4-(cyclopentyloxy)-5-methoxyphenyl]acrylic acid	7.14771	310.77	1	0.023			PPh3	262.29	7.2392	THF	57.5	0.889	51.1175						0
		Benzyl alcohol	2.98466	108.14	1.2	0.0276			DBPEAC	335.98	9.27305				0						0
		Total	10.1324	418.91		0.0506		0			16.5123				51.1175		0				0
										Yield (%)	90
										AE (%)	95.7007						mass (g)	MW	mol
										RME (%)	81.9021					Product	8.29863	400.9	0.0207
										MI total (g g-1)	9.37048
										MI RRC (g g-1)	3.21073
										MI Solvents (g g-1)	6.15975
		METRICS
		Reactant (Limiting Reactant First)	Mass (g)	MW (g mmol-1)	equiv	Mol	Catalyst	Mass (g)	Reagent	MW (g mmol-1)	Mass (g)	Reaction Solvent	Volume (mL)	Density (g.mL-1)	Mass (g)	Work up Chemical	Mass (g)	Workup Solvent	Volume (mL)	Density (g mL-1)	Mass (g)
Reactant E		Fmoc-D-Dab(Boc)-OH	10.1315	440.5	1	0.023			PPh3	262.29	7.2392	THF	57.5	0.889	51.1175						0
		Benzyl alcohol	2.98466	108.14	1.2	0.0276			DBPEAC	335.98	9.27305				0						0
		Total	13.1162	548.64		0.0506		0			16.5123				51.1175		0				0
										Yield (%)	90
										AE (%)	96.7155						mass (g)	MW	mol
										RME (%)	83.7427					Product	10.9838	530.62	0.0207
										MI total (g g-1)	7.35134
										MI RRC (g g-1)	2.69746
										MI Solvents (g g-1)	4.65388
Simulation 2: DBPEAC/PPh3 1.2 eq, Conc 0.4 M, yield of 80%
		METRICS
		Reactant (Limiting Reactant First)	Mass (g)	MW (g mmol-1)	equiv	Mol	Catalyst	Mass (g)	Reagent	MW (g mmol-1)	Mass (g)	Reaction Solvent	Volume (mL)	Density (g.mL-1)	Mass (g)	Work up Chemical	Mass (g)	Workup Solvent	Volume (mL)	Density (g mL-1)	Mass (g)
Reactant A		Benzoic acid	2.80876	122.12	1	0.023			PPh3	262.29	7.2392	THF	57.5	0.889	51.1175						0
		Benzyl alcohol	2.98466	108.14	1.2	0.0276			DBPEAC	335.98	9.27305				0						0
		Total	5.79342	230.26		0.0506		0			16.5123				51.1175		0				0
										Yield (%)	80
										AE (%)	92.1784						mass (g)	MW	mol
										RME (%)	67.4109					Product	3.9054	212.25	0.0184
										MI total (g g-1)	18.8004
										MI RRC (g g-1)	5.7115
										MI Solvents (g g-1)	13.0889		Conc (M)	0.4
		METRICS
		Reactant (Limiting Reactant First)	Mass (g)	MW (g mmol-1)	equiv	Mol	Catalyst	Mass (g)	Reagent	MW (g mmol-1)	Mass (g)	Reaction Solvent	Volume (mL)	Density (g.mL-1)	Mass (g)	Work up Chemical	Mass (g)	Workup Solvent	Volume (mL)	Density (g mL-1)	Mass (g)
Reactant B		4-Chlorobenzoic acid	3.60111	156.57	1	0.023			PPh3	262.29	7.2392	THF	57.5	0.889	51.1175						0
		Benzyl alcohol	2.98466	108.14	1.2	0.0276			DBPEAC	335.98	9.27305				0						0
		Total	6.58577	264.71		0.0506		0			16.5123				51.1175		0				0
										Yield (%)	80
										AE (%)	93.1926						mass (g)	MW	mol
										RME (%)	68.9227					Product	4.5391	246.69	0.0184
										MI total (g g-1)	16.3503
										MI RRC (g g-1)	5.08868
										MI Solvents (g g-1)	11.2616
		METRICS
		Reactant (Limiting Reactant First)	Mass (g)	MW (g mmol-1)	equiv	Mol	Catalyst	Mass (g)	Reagent	MW (g mmol-1)	Mass (g)	Reaction Solvent	Volume (mL)	Density (g.mL-1)	Mass (g)	Work up Chemical	Mass (g)	Workup Solvent	Volume (mL)	Density (g mL-1)	Mass (g)
Reactant C		3,5-Nitrobenzoic acid	4.87991	212.17	1	0.023			PPh3	262.29	7.2392	THF	57.5	0.889	51.1175						0
		Benzyl alcohol	2.98466	108.14	1.2	0.0276			DBPEAC	335.98	9.27305				0						0
		Total	7.86457	320.31		0.0506		0			16.5123				51.1175		0				0
										Yield (%)	80
										AE (%)	94.3586						mass (g)	MW	mol
										RME (%)	70.7122					Product	5.56122	302.24	0.0184
										MI total (g g-1)	13.5751
										MI RRC (g g-1)	4.38336
										MI Solvents (g g-1)	9.19178
		METRICS
		Reactant (Limiting Reactant First)	Mass (g)	MW (g mmol-1)	equiv	Mol	Catalyst	Mass (g)	Reagent	MW (g mmol-1)	Mass (g)	Reaction Solvent	Volume (mL)	Density (g.mL-1)	Mass (g)	Work up Chemical	Mass (g)	Workup Solvent	Volume (mL)	Density (g mL-1)	Mass (g)
Reactant D		(2E)-3-[2-chloro-4-(cyclopentyloxy)-5-methoxyphenyl]acrylic acid	7.14771	310.77	1	0.023			PPh3	262.29	7.2392	THF	57.5	0.889	51.1175						0
		Benzyl alcohol	2.98466	108.14	1.2	0.0276			DBPEAC	335.98	9.27305				0						0
		Total	10.1324	418.91		0.0506		0			16.5123				51.1175		0				0
										Yield (%)	80
										AE (%)	95.7007						mass (g)	MW	mol
										RME (%)	72.8019					Product	7.37656	400.9	0.0184
										MI total (g g-1)	10.5418
										MI RRC (g g-1)	3.61207
										MI Solvents (g g-1)	6.92972
		METRICS
		Reactant (Limiting Reactant First)	Mass (g)	MW (g mmol-1)	equiv	Mol	Catalyst	Mass (g)	Reagent	MW (g mmol-1)	Mass (g)	Reaction Solvent	Volume (mL)	Density (g.mL-1)	Mass (g)	Work up Chemical	Mass (g)	Workup Solvent	Volume (mL)	Density (g mL-1)	Mass (g)
Reactant E		Fmoc-D-Dab(Boc)-OH	10.1315	440.5	1	0.023			PPh3	262.29	7.2392	THF	57.5	0.889	51.1175						0
		Benzyl alcohol	2.98466	108.14	1.2	0.0276			DBPEAC	335.98	9.27305				0						0
		Total	13.1162	548.64		0.0506		0			16.5123				51.1175		0				0
										Yield (%)	80
										AE (%)	96.7155						mass (g)	MW	mol
										RME (%)	74.438					Product	9.76341	530.62	0.0184
										MI total (g g-1)	8.27026
										MI RRC (g g-1)	3.03464
										MI Solvents (g g-1)	5.23562
Simulation 3: DBPEAC/PPh3 1.2 eq, Conc 0.4 M, yield of 70%
		METRICS
		Reactant (Limiting Reactant First)	Mass (g)	MW (g mmol-1)	equiv	Mol	Catalyst	Mass (g)	Reagent	MW (g mmol-1)	Mass (g)	Reaction Solvent	Volume (mL)	Density (g.mL-1)	Mass (g)	Work up Chemical	Mass (g)	Workup Solvent	Volume (mL)	Density (g mL-1)	Mass (g)
Reactant A		Benzoic acid	2.80876	122.12	1	0.023			PPh3	262.29	7.2392	THF	57.5	0.889	51.1175						0
		Benzyl alcohol	2.98466	108.14	1.2	0.0276			DBPEAC	335.98	9.27305				0						0
		Total	5.79342	230.26		0.0506		0			16.5123				51.1175		0				0
										Yield (%)	70
										AE (%)	92.1784						mass (g)	MW	mol
										RME (%)	58.9845					Product	3.41722	212.25	0.0161
										MI total (g g-1)	21.4862
										MI RRC (g g-1)	6.52742
										MI Solvents (g g-1)	14.9588		Conc (M)	0.4
		METRICS
		Reactant (Limiting Reactant First)	Mass (g)	MW (g mmol-1)	equiv	Mol	Catalyst	Mass (g)	Reagent	MW (g mmol-1)	Mass (g)	Reaction Solvent	Volume (mL)	Density (g.mL-1)	Mass (g)	Work up Chemical	Mass (g)	Workup Solvent	Volume (mL)	Density (g mL-1)	Mass (g)
Reactant B		4-Chlorobenzoic acid	3.60111	156.57	1	0.023			PPh3	262.29	7.2392	THF	57.5	0.889	51.1175						0
		Benzyl alcohol	2.98466	108.14	1.2	0.0276			DBPEAC	335.98	9.27305				0						0
		Total	6.58577	264.71		0.0506		0			16.5123				51.1175		0				0
										Yield (%)	70
										AE (%)	93.1926						mass (g)	MW	mol
										RME (%)	60.3074					Product	3.97171	246.69	0.0161
										MI total (g g-1)	18.686
										MI RRC (g g-1)	5.81564
										MI Solvents (g g-1)	12.8704
		METRICS
		Reactant (Limiting Reactant First)	Mass (g)	MW (g mmol-1)	equiv	Mol	Catalyst	Mass (g)	Reagent	MW (g mmol-1)	Mass (g)	Reaction Solvent	Volume (mL)	Density (g.mL-1)	Mass (g)	Work up Chemical	Mass (g)	Workup Solvent	Volume (mL)	Density (g mL-1)	Mass (g)
Reactant C		3,5-Nitrobenzoic acid	4.87991	212.17	1	0.023			PPh3	262.29	7.2392	THF	57.5	0.889	51.1175						0
		Benzyl alcohol	2.98466	108.14	1.2	0.0276			DBPEAC	335.98	9.27305				0						0
		Total	7.86457	320.31		0.0506		0			16.5123				51.1175		0				0
										Yield (%)	70
										AE (%)	94.3586						mass (g)	MW	mol
										RME (%)	61.8732					Product	4.86606	302.24	0.0161
										MI total (g g-1)	15.5145
										MI RRC (g g-1)	5.00956
										MI Solvents (g g-1)	10.5049
		METRICS
		Reactant (Limiting Reactant First)	Mass (g)	MW (g mmol-1)	equiv	Mol	Catalyst	Mass (g)	Reagent	MW (g mmol-1)	Mass (g)	Reaction Solvent	Volume (mL)	Density (g.mL-1)	Mass (g)	Work up Chemical	Mass (g)	Workup Solvent	Volume (mL)	Density (g mL-1)	Mass (g)
Reactant D		(2E)-3-[2-chloro-4-(cyclopentyloxy)-5-methoxyphenyl]acrylic acid	7.14771	310.77	1	0.023			PPh3	262.29	7.2392	THF	57.5	0.889	51.1175						0
		Benzyl alcohol	2.98466	108.14	1.2	0.0276			DBPEAC	335.98	9.27305				0						0
		Total	10.1324	418.91		0.0506		0			16.5123				51.1175		0				0
										Yield (%)	70
										AE (%)	95.7007						mass (g)	MW	mol
										RME (%)	63.7017					Product	6.45449	400.9	0.0161
										MI total (g g-1)	12.0478
										MI RRC (g g-1)	4.12808
										MI Solvents (g g-1)	7.91968
		METRICS
		Reactant (Limiting Reactant First)	Mass (g)	MW (g mmol-1)	equiv	Mol	Catalyst	Mass (g)	Reagent	MW (g mmol-1)	Mass (g)	Reaction Solvent	Volume (mL)	Density (g.mL-1)	Mass (g)	Work up Chemical	Mass (g)	Workup Solvent	Volume (mL)	Density (g mL-1)	Mass (g)
Reactant E		Fmoc-D-Dab(Boc)-OH	10.1315	440.5	1	0.023			PPh3	262.29	7.2392	THF	57.5	0.889	51.1175						0
		Benzyl alcohol	2.98466	108.14	1.2	0.0276			DBPEAC	335.98	9.27305				0						0
		Total	13.1162	548.64		0.0506		0			16.5123				51.1175		0				0
										Yield (%)	70
										AE (%)	96.7155						mass (g)	MW	mol
										RME (%)	65.1332					Product	8.54298	530.62	0.0161
										MI total (g g-1)	9.45172
										MI RRC (g g-1)	3.46816
										MI Solvents (g g-1)	5.98357
Simulation 4: DBPEAC/PPh3 1.2 eq, Conc 0.4 M, yield of 50%
		METRICS
		Reactant (Limiting Reactant First)	Mass (g)	MW (g mmol-1)	equiv	Mol	Catalyst	Mass (g)	Reagent	MW (g mmol-1)	Mass (g)	Reaction Solvent	Volume (mL)	Density (g.mL-1)	Mass (g)	Work up Chemical	Mass (g)	Workup Solvent	Volume (mL)	Density (g mL-1)	Mass (g)
Reactant A		Benzoic acid	2.80876	122.12	1	0.023			PPh3	262.29	7.2392	THF	57.5	0.889	51.1175						0
		Benzyl alcohol	2.98466	108.14	1.2	0.0276			DBPEAC	335.98	9.27305				0						0
		Total	5.79342	230.26		0.0506		0			16.5123				51.1175		0				0
										Yield (%)	50
										AE (%)	92.1784						mass (g)	MW	mol
										RME (%)	42.1318					Product	2.44088	212.25	0.0115
										MI total (g g-1)	30.0807
										MI RRC (g g-1)	9.13839
										MI Solvents (g g-1)	20.9423		Conc (M)	0.4
		METRICS
		Reactant (Limiting Reactant First)	Mass (g)	MW (g mmol-1)	equiv	Mol	Catalyst	Mass (g)	Reagent	MW (g mmol-1)	Mass (g)	Reaction Solvent	Volume (mL)	Density (g.mL-1)	Mass (g)	Work up Chemical	Mass (g)	Workup Solvent	Volume (mL)	Density (g mL-1)	Mass (g)
Reactant B		4-Chlorobenzoic acid	3.60111	156.57	1	0.023			PPh3	262.29	7.2392	THF	57.5	0.889	51.1175						0
		Benzyl alcohol	2.98466	108.14	1.2	0.0276			DBPEAC	335.98	9.27305				0						0
		Total	6.58577	264.71		0.0506		0			16.5123				51.1175		0				0
										Yield (%)	50
										AE (%)	93.1926						mass (g)	MW	mol
										RME (%)	43.0767					Product	2.83693	246.69	0.0115
										MI total (g g-1)	26.1605
										MI RRC (g g-1)	8.14189
										MI Solvents (g g-1)	18.0186
		METRICS
		Reactant (Limiting Reactant First)	Mass (g)	MW (g mmol-1)	equiv	Mol	Catalyst	Mass (g)	Reagent	MW (g mmol-1)	Mass (g)	Reaction Solvent	Volume (mL)	Density (g.mL-1)	Mass (g)	Work up Chemical	Mass (g)	Workup Solvent	Volume (mL)	Density (g mL-1)	Mass (g)
Reactant C		3,5-Nitrobenzoic acid	4.87991	212.17	1	0.023			PPh3	262.29	7.2392	THF	57.5	0.889	51.1175						0
		Benzyl alcohol	2.98466	108.14	1.2	0.0276			DBPEAC	335.98	9.27305				0						0
		Total	7.86457	320.31		0.0506		0			16.5123				51.1175		0				0
										Yield (%)	50
										AE (%)	94.3586						mass (g)	MW	mol
										RME (%)	44.1951					Product	3.47576	302.24	0.0115
										MI total (g g-1)	21.7202
										MI RRC (g g-1)	7.01338
										MI Solvents (g g-1)	14.7069
		METRICS
		Reactant (Limiting Reactant First)	Mass (g)	MW (g mmol-1)	equiv	Mol	Catalyst	Mass (g)	Reagent	MW (g mmol-1)	Mass (g)	Reaction Solvent	Volume (mL)	Density (g.mL-1)	Mass (g)	Work up Chemical	Mass (g)	Workup Solvent	Volume (mL)	Density (g mL-1)	Mass (g)
Reactant D		(2E)-3-[2-chloro-4-(cyclopentyloxy)-5-methoxyphenyl]acrylic acid	7.14771	310.77	1	0.023			PPh3	262.29	7.2392	THF	57.5	0.889	51.1175						0
		Benzyl alcohol	2.98466	108.14	1.2	0.0276			DBPEAC	335.98	9.27305				0						0
		Total	10.1324	418.91		0.0506		0			16.5123				51.1175		0				0
										Yield (%)	50
										AE (%)	95.7007						mass (g)	MW	mol
										RME (%)	45.5012					Product	4.61035	400.9	0.0115
										MI total (g g-1)	16.8669
										MI RRC (g g-1)	5.77931
										MI Solvents (g g-1)	11.0876
		METRICS
		Reactant (Limiting Reactant First)	Mass (g)	MW (g mmol-1)	equiv	Mol	Catalyst	Mass (g)	Reagent	MW (g mmol-1)	Mass (g)	Reaction Solvent	Volume (mL)	Density (g.mL-1)	Mass (g)	Work up Chemical	Mass (g)	Workup Solvent	Volume (mL)	Density (g mL-1)	Mass (g)
Reactant E		Fmoc-D-Dab(Boc)-OH	10.1315	440.5	1	0.023			PPh3	262.29	7.2392	THF	57.5	0.889	51.1175						0
		Benzyl alcohol	2.98466	108.14	1.2	0.0276			DBPEAC	335.98	9.27305				0						0
		Total	13.1162	548.64		0.0506		0			16.5123				51.1175		0				0
										Yield (%)	50
										AE (%)	96.7155						mass (g)	MW	mol
										RME (%)	46.5237					Product	6.10213	530.62	0.0115
										MI total (g g-1)	13.2324
										MI RRC (g g-1)	4.85542
										MI Solvents (g g-1)	8.37699
Simulation 5: DBPEAC/PPh3 1.2 eq, Scale x5, Conc 0.4 M, yield of 90%
		METRICS
		Reactant (Limiting Reactant First)	Mass (g)	MW (g mmol-1)	equiv	Mol	Catalyst	Mass (g)	Reagent	MW (g mmol-1)	Mass (g)	Reaction Solvent	Volume (mL)	Density (g.mL-1)	Mass (g)	Work up Chemical	Mass (g)	Workup Solvent	Volume (mL)	Density (g mL-1)	Mass (g)
Reactant A		Benzoic acid	14.05	122.12	1	0.115051			PPh3	262.29	36.212	THF	287.5	0.889	255.588						0
		Benzyl alcohol	14.9299	108.14	1.2	0.138061			DBPEAC	335.98	46.3857				0						0
		Total	28.9799	230.26		0.253112		0			82.5977				255.588		0				0
										Yield (%)	90
										AE (%)	92.1784						mass (g)	MW	mol
										RME (%)	75.8373					Product	21.9776	212.25	0.103546
										MI total (g g-1)	16.7064
										MI RRC (g g-1)	5.07689
										MI Solvents (g g-1)	11.6295		Conc (M)	0.400177
		METRICS
		Reactant (Limiting Reactant First)	Mass (g)	MW (g mmol-1)	equiv	Mol	Catalyst	Mass (g)	Reagent	MW (g mmol-1)	Mass (g)	Reaction Solvent	Volume (mL)	Density (g.mL-1)	Mass (g)	Work up Chemical	Mass (g)	Workup Solvent	Volume (mL)	Density (g mL-1)	Mass (g)
Reactant B		4-Chlorobenzoic acid	18	156.57	1	0.114965			PPh3	262.29	36.1849	THF	287.5	0.889	255.588						0
		Benzyl alcohol	14.9187	108.14	1.2	0.137957			DBPEAC	335.98	46.3509				0						0
		Total	32.9187	264.71		0.252922		0			82.5358				255.588		0				0
										Yield (%)	90
										AE (%)	93.1926						mass (g)	MW	mol
										RME (%)	77.5381					Product	25.5245	246.69	0.103468
										MI total (g g-1)	14.5367
										MI RRC (g g-1)	4.52327
										MI Solvents (g g-1)	10.0134
		METRICS
		Reactant (Limiting Reactant First)	Mass (g)	MW (g mmol-1)	equiv	Mol	Catalyst	Mass (g)	Reagent	MW (g mmol-1)	Mass (g)	Reaction Solvent	Volume (mL)	Density (g.mL-1)	Mass (g)	Work up Chemical	Mass (g)	Workup Solvent	Volume (mL)	Density (g mL-1)	Mass (g)
Reactant C		3,5-Nitrobenzoic acid	24.4	212.17	1	0.115002			PPh3	262.29	36.1967	THF	287.5	0.889	255.588						0
		Benzyl alcohol	14.9236	108.14	1.2	0.138003			DBPEAC	335.98	46.3661				0						0
		Total	39.3236	320.31		0.253005		0			82.5628				255.588		0				0
										Yield (%)	90
										AE (%)	94.3586						mass (g)	MW	mol
										RME (%)	79.5513					Product	31.2824	302.24	0.103502
										MI total (g g-1)	12.0666
										MI RRC (g g-1)	3.89632
										MI Solvents (g g-1)	8.17032
		METRICS
		Reactant (Limiting Reactant First)	Mass (g)	MW (g mmol-1)	equiv	Mol	Catalyst	Mass (g)	Reagent	MW (g mmol-1)	Mass (g)	Reaction Solvent	Volume (mL)	Density (g.mL-1)	Mass (g)	Work up Chemical	Mass (g)	Workup Solvent	Volume (mL)	Density (g mL-1)	Mass (g)
Reactant D		(2E)-3-[2-chloro-4-(cyclopentyloxy)-5-methoxyphenyl]acrylic acid	35.7385	310.77	1	0.115			PPh3	262.29	36.196	THF	287.5	0.889	255.588						0
		Benzyl alcohol	14.9233	108.14	1.2	0.138			DBPEAC	335.98	46.3652				0						0
		Total	50.6619	418.91		0.253		0			82.5613				255.588		0				0
										Yield (%)	90
										AE (%)	95.7007						mass (g)	MW	mol
										RME (%)	81.9021					Product	41.4931	400.9	0.1035
										MI total (g g-1)	9.37048
										MI RRC (g g-1)	3.21073
										MI Solvents (g g-1)	6.15975
		METRICS
		Reactant (Limiting Reactant First)	Mass (g)	MW (g mmol-1)	equiv	Mol	Catalyst	Mass (g)	Reagent	MW (g mmol-1)	Mass (g)	Reaction Solvent	Volume (mL)	Density (g.mL-1)	Mass (g)	Work up Chemical	Mass (g)	Workup Solvent	Volume (mL)	Density (g mL-1)	Mass (g)
Reactant E		Fmoc-D-Dab(Boc)-OH	50.6575	440.5	1	0.115			PPh3	262.29	36.196	THF	287.5	0.889	255.588						0
		Benzyl alcohol	14.9233	108.14	1.2	0.138			DBPEAC	335.98	46.3652				0						0
		Total	65.5808	548.64		0.253		0			82.5613				255.588		0				0
										Yield (%)	90
										AE (%)	96.7155						mass (g)	MW	mol
										RME (%)	83.7427					Product	54.9192	530.62	0.1035
										MI total (g g-1)	7.35134
										MI RRC (g g-1)	2.69746
										MI Solvents (g g-1)	4.65388
Simulation 6: DBPEAC/PPh3 1.2 eq, Conc 0.8 M, yield of 90%
		METRICS
		Reactant (Limiting Reactant First)	Mass (g)	MW (g mmol-1)	equiv	Mol	Catalyst	Mass (g)	Reagent	MW (g mmol-1)	Mass (g)	Reaction Solvent	Volume (mL)	Density (g.mL-1)	Mass (g)	Work up Chemical	Mass (g)	Workup Solvent	Volume (mL)	Density (g mL-1)	Mass (g)
Reactant A		Benzoic acid	2.80876	122.12	1	0.023			PPh3	262.29	7.2392	THF	28.7	0.889	25.5143						0
		Benzyl alcohol	2.98466	108.14	1.2	0.0276			DBPEAC	335.98	9.27305				0						0
		Total	5.79342	230.26		0.0506		0			16.5123				25.5143		0				0
										Yield (%)	90
										AE (%)	92.1784						mass (g)	MW	mol
										RME (%)	75.8373					Product	4.39358	212.25	0.0207
										MI total (g g-1)	10.8841
										MI RRC (g g-1)	5.07689
										MI Solvents (g g-1)	5.80718		Conc (M)	0.801394
		METRICS
		Reactant (Limiting Reactant First)	Mass (g)	MW (g mmol-1)	equiv	Mol	Catalyst	Mass (g)	Reagent	MW (g mmol-1)	Mass (g)	Reaction Solvent	Volume (mL)	Density (g.mL-1)	Mass (g)	Work up Chemical	Mass (g)	Workup Solvent	Volume (mL)	Density (g mL-1)	Mass (g)
Reactant B		4-Chlorobenzoic acid	3.60111	156.57	1	0.023			PPh3	262.29	7.2392	THF	28.7	0.889	25.5143						0
		Benzyl alcohol	2.98466	108.14	1.2	0.0276			DBPEAC	335.98	9.27305				0						0
		Total	6.58577	264.71		0.0506		0			16.5123				25.5143		0				0
										Yield (%)	90
										AE (%)	93.1926						mass (g)	MW	mol
										RME (%)	77.5381					Product	5.10648	246.69	0.0207
										MI total (g g-1)	9.51973
										MI RRC (g g-1)	4.52327
										MI Solvents (g g-1)	4.99645
		METRICS
		Reactant (Limiting Reactant First)	Mass (g)	MW (g mmol-1)	equiv	Mol	Catalyst	Mass (g)	Reagent	MW (g mmol-1)	Mass (g)	Reaction Solvent	Volume (mL)	Density (g.mL-1)	Mass (g)	Work up Chemical	Mass (g)	Workup Solvent	Volume (mL)	Density (g mL-1)	Mass (g)
Reactant C		3,5-Nitrobenzoic acid	4.87991	212.17	1	0.023			PPh3	262.29	7.2392	THF	28.7	0.889	25.5143						0
		Benzyl alcohol	2.98466	108.14	1.2	0.0276			DBPEAC	335.98	9.27305				0						0
		Total	7.86457	320.31		0.0506		0			16.5123				25.5143		0				0
										Yield (%)	90
										AE (%)	94.3586						mass (g)	MW	mol
										RME (%)	79.5513					Product	6.25637	302.24	0.0207
										MI total (g g-1)	7.97446
										MI RRC (g g-1)	3.89632
										MI Solvents (g g-1)	4.07813
		METRICS
		Reactant (Limiting Reactant First)	Mass (g)	MW (g mmol-1)	equiv	Mol	Catalyst	Mass (g)	Reagent	MW (g mmol-1)	Mass (g)	Reaction Solvent	Volume (mL)	Density (g.mL-1)	Mass (g)	Work up Chemical	Mass (g)	Workup Solvent	Volume (mL)	Density (g mL-1)	Mass (g)
Reactant D		(2E)-3-[2-chloro-4-(cyclopentyloxy)-5-methoxyphenyl]acrylic acid	7.14771	310.77	1	0.023			PPh3	262.29	7.2392	THF	28.7	0.889	25.5143						0
		Benzyl alcohol	2.98466	108.14	1.2	0.0276			DBPEAC	335.98	9.27305				0						0
		Total	10.1324	418.91		0.0506		0			16.5123				25.5143		0				0
										Yield (%)	90
										AE (%)	95.7007						mass (g)	MW	mol
										RME (%)	81.9021					Product	8.29863	400.9	0.0207
										MI total (g g-1)	6.28525
										MI RRC (g g-1)	3.21073
										MI Solvents (g g-1)	3.07452
		METRICS
		Reactant (Limiting Reactant First)	Mass (g)	MW (g mmol-1)	equiv	Mol	Catalyst	Mass (g)	Reagent	MW (g mmol-1)	Mass (g)	Reaction Solvent	Volume (mL)	Density (g.mL-1)	Mass (g)	Work up Chemical	Mass (g)	Workup Solvent	Volume (mL)	Density (g mL-1)	Mass (g)
Reactant E		Fmoc-D-Dab(Boc)-OH	10.1315	440.5	1	0.023			PPh3	262.29	7.2392	THF	28.7	0.889	25.5143						0
		Benzyl alcohol	2.98466	108.14	1.2	0.0276			DBPEAC	335.98	9.27305				0						0
		Total	13.1162	548.64		0.0506		0			16.5123				25.5143		0				0
										Yield (%)	90
										AE (%)	96.7155						mass (g)	MW	mol
										RME (%)	83.7427					Product	10.9838	530.62	0.0207
										MI total (g g-1)	5.02035
										MI RRC (g g-1)	2.69746
										MI Solvents (g g-1)	2.3229
			Entry	Substrate	AE	RME	PMI	PMIRRC	PMIsolv
					(%)	(%)	(g g-1)	(g g-1)	(g g-1)
			Simulation 1: DBPEAC/PPh3 1.2 eq, Conc 0.4 M, yield of 90%
			1	A	92.1784	75.8373	16.7115	5.07689	11.6346
			2	B	93.1926	77.5381	14.5336	4.52327	10.0103
			3	C	94.3586	79.5513	12.0668	3.89632	8.17048
			4	D	95.7007	81.9021	9.37048	3.21073	6.15975
			5	E	96.7155	83.7427	7.35134	2.69746	4.65388
			Simulation 2: DBPEAC/PPh3 1.2 eq, Conc 0.4 M, yield of 80%
			1	A	92.1784	67.4109	18.8004	5.7115	13.0889
			2	B	93.1926	68.9227	16.3503	5.08868	11.2616
			3	C	94.3586	70.7122	13.5751	4.38336	9.19178
			4	D	95.7007	72.8019	10.5418	3.61207	6.92972
			5	E	96.7155	74.438	8.27026	3.03464	5.23562
			Simulation 3: DBPEAC/PPh3 1.2 eq, Conc 0.4 M, yield of 70%
			1	A	92.1784	58.9845	21.4862	6.52742	14.9588
			2	B	93.1926	60.3074	18.686	5.81564	12.8704
			3	C	94.3586	61.8732	15.5145	5.00956	10.5049
			4	D	95.7007	63.7017	12.0478	4.12808	7.91968
			5	E	96.7155	65.1332	9.45172	3.46816	5.98357
			Simulation 4: DBPEAC/PPh3 1.2 eq, Conc 0.4 M, yield of 50%
			1	A	92.1784	42.1318	30.0807	9.13839	20.9423
			2	B	93.1926	43.0767	26.1605	8.14189	18.0186
			3	C	94.3586	44.1951	21.7202	7.01338	14.7069
			4	D	95.7007	45.5012	16.8669	5.77931	11.0876
			5	E	96.7155	46.5237	13.2324	4.85542	8.37699
			Simulation 5: DBPEAC/PPh3 1.2 eq, Scale x5, Conc 0.4 M, yield of 90%
			1	A	92.1784	75.8373	16.7064	5.07689	11.6295
			2	B	93.1926	77.5381	14.5367	4.52327	10.0134
			3	C	94.3586	79.5513	12.0666	3.89632	8.17032
			4	D	95.7007	81.9021	9.37048	3.21073	6.15975
			5	E	96.7155	83.7427	7.35134	2.69746	4.65388
			Simulation 6: DBPEAC/PPh3 1.2 eq, Conc 0.8 M, yield of 90%
			1	A	92.1784	75.8373	10.8841	5.07689	5.80718
			2	B	93.1926	77.5381	9.51973	4.52327	4.99645
			3	C	94.3586	79.5513	7.97446	3.89632	4.07813
			4	D	95.7007	81.9021	6.28525	3.21073	3.07452
			5	E	96.7155	83.7427	5.02035	2.69746	2.3229

## Sheet: Reactants 1.0 eq conc
Simulation 1: Everything 1.0 eq, Conc 0.1 M, yield of 90%
		METRICS
		Reactant (Limiting Reactant First)	Mass (g)	MW (g mmol-1)	equiv	Mol	Catalyst	Mass (g)	Reagent	MW (g mmol-1)	Mass (g)	Reaction Solvent	Volume (mL)	Density (g.mL-1)	Mass (g)	Work up Chemical	Mass (g)	Workup Solvent	Volume (mL)	Density (g mL-1)	Mass (g)
Reactant A		Benzoic acid	2.80876	122.12	1	0.023			PPh3	262.29	6.03267	THF	229	0.889	203.581						0
		Benzyl alcohol	2.48722	108.14	1	0.023			DEAD	174.16	4.00568				0						0
		Total	5.29598	230.26		0.046		0			10.0384				203.581		0				0
										Yield (%)	90
										AE (%)	92.1784						mass (g)	MW	mol
										RME (%)	82.9606					Product	4.39358	212.25	0.0207
										MI total (g g-1)	49.8262
										MI RRC (g g-1)	3.49017
										MI Solvents (g g-1)	46.3361		Conc (M)	0.100437
		METRICS
		Reactant (Limiting Reactant First)	Mass (g)	MW (g mmol-1)	equiv	Mol	Catalyst	Mass (g)	Reagent	MW (g mmol-1)	Mass (g)	Reaction Solvent	Volume (mL)	Density (g.mL-1)	Mass (g)	Work up Chemical	Mass (g)	Workup Solvent	Volume (mL)	Density (g mL-1)	Mass (g)
Reactant B		4-Chlorobenzoic acid	3.60111	156.57	1	0.023			PPh3	262.29	6.03267	THF	229	0.889	203.581						0
		Benzyl alcohol	2.48722	108.14	1	0.023			DEAD	174.16	4.00568				0						0
		Total	6.08833	264.71		0.046		0			10.0384				203.581		0				0
										Yield (%)	90
										AE (%)	93.1926						mass (g)	MW	mol
										RME (%)	83.8733					Product	5.10648	246.69	0.0207
										MI total (g g-1)	43.0252
										MI RRC (g g-1)	3.15808
										MI Solvents (g g-1)	39.8672
		METRICS
		Reactant (Limiting Reactant First)	Mass (g)	MW (g mmol-1)	equiv	Mol	Catalyst	Mass (g)	Reagent	MW (g mmol-1)	Mass (g)	Reaction Solvent	Volume (mL)	Density (g.mL-1)	Mass (g)	Work up Chemical	Mass (g)	Workup Solvent	Volume (mL)	Density (g mL-1)	Mass (g)
Reactant C		3,5-Nitrobenzoic acid	4.87991	212.17	1	0.023			PPh3	262.29	6.03267	THF	229	0.889	203.581						0
		Benzyl alcohol	2.48722	108.14	1	0.023			DEAD	174.16	4.00568				0						0
		Total	7.36713	320.31		0.046		0			10.0384				203.581		0				0
										Yield (%)	90
										AE (%)	94.3586						mass (g)	MW	mol
										RME (%)	84.9227					Product	6.25637	302.24	0.0207
										MI total (g g-1)	35.3218
										MI RRC (g g-1)	2.78204
										MI Solvents (g g-1)	32.5398
		METRICS
		Reactant (Limiting Reactant First)	Mass (g)	MW (g mmol-1)	equiv	Mol	Catalyst	Mass (g)	Reagent	MW (g mmol-1)	Mass (g)	Reaction Solvent	Volume (mL)	Density (g.mL-1)	Mass (g)	Work up Chemical	Mass (g)	Workup Solvent	Volume (mL)	Density (g mL-1)	Mass (g)
Reactant D		(2E)-3-[2-chloro-4-(cyclopentyloxy)-5-methoxyphenyl]acrylic acid	7.14771	310.77	1	0.023			PPh3	262.29	6.03267	THF	229	0.889	203.581						0
		Benzyl alcohol	2.48722	108.14	1	0.023			DEAD	174.16	4.00568				0						0
		Total	9.63493	418.91		0.046		0			10.0384				203.581		0				0
										Yield (%)	90
										AE (%)	95.7007						mass (g)	MW	mol
										RME (%)	86.1307					Product	8.29863	400.9	0.0207
										MI total (g g-1)	26.9025
										MI RRC (g g-1)	2.37067
										MI Solvents (g g-1)	24.5319
		METRICS
		Reactant (Limiting Reactant First)	Mass (g)	MW (g mmol-1)	equiv	Mol	Catalyst	Mass (g)	Reagent	MW (g mmol-1)	Mass (g)	Reaction Solvent	Volume (mL)	Density (g.mL-1)	Mass (g)	Work up Chemical	Mass (g)	Workup Solvent	Volume (mL)	Density (g mL-1)	Mass (g)
Reactant E		Fmoc-D-Dab(Boc)-OH	10.1315	440.5	1	0.023			PPh3	262.29	6.03267	THF	229	0.889	203.581						0
		Benzyl alcohol	2.48722	108.14	1	0.023			DEAD	174.16	4.00568				0						0
		Total	12.6187	548.64		0.046		0			10.0383				203.581		0				0
										Yield (%)	90
										AE (%)	96.7155						mass (g)	MW	mol
										RME (%)	87.044					Product	10.9838	530.62	0.0207
										MI total (g g-1)	20.5974
										MI RRC (g g-1)	2.06277
										MI Solvents (g g-1)	18.5346
										MI Workup	0
Simulation 2: Everything 1.0 eq, Conc 0.5 M, yield of 90%
		METRICS
		Reactant (Limiting Reactant First)	Mass (g)	MW (g mmol-1)	equiv	Mol	Catalyst	Mass (g)	Reagent	MW (g mmol-1)	Mass (g)	Reaction Solvent	Volume (mL)	Density (g.mL-1)	Mass (g)	Work up Chemical	Mass (g)	Workup Solvent	Volume (mL)	Density (g mL-1)	Mass (g)
Reactant A		Benzoic acid	2.80876	122.12	1	0.023			PPh3	262.29	6.03267	THF	46	0.889	40.894						0
		Benzyl alcohol	2.48722	108.14	1	0.023			DEAD	174.16	4.00568				0						0
		Total	5.29598	230.26		0.046		0			10.0384				40.894		0				0
										Yield (%)	90
										AE (%)	92.1784						mass (g)	MW	mol
										RME (%)	82.9606					Product	4.39358	212.25	0.0207
										MI total (g g-1)	12.7979
										MI RRC (g g-1)	3.49017
										MI Solvents (g g-1)	9.30768		Conc (M)	0.5
		METRICS
		Reactant (Limiting Reactant First)	Mass (g)	MW (g mmol-1)	equiv	Mol	Catalyst	Mass (g)	Reagent	MW (g mmol-1)	Mass (g)	Reaction Solvent	Volume (mL)	Density (g.mL-1)	Mass (g)	Work up Chemical	Mass (g)	Workup Solvent	Volume (mL)	Density (g mL-1)	Mass (g)
Reactant B		4-Chlorobenzoic acid	3.60111	156.57	1	0.023			PPh3	262.29	6.03267	THF	46	0.889	40.894						0
		Benzyl alcohol	2.48722	108.14	1	0.023			DEAD	174.16	4.00568				0						0
		Total	6.08833	264.71		0.046		0			10.0384				40.894		0				0
										Yield (%)	90
										AE (%)	93.1926						mass (g)	MW	mol
										RME (%)	83.8733					Product	5.10648	246.69	0.0207
										MI total (g g-1)	11.1663
										MI RRC (g g-1)	3.15808
										MI Solvents (g g-1)	8.00825
		METRICS
		Reactant (Limiting Reactant First)	Mass (g)	MW (g mmol-1)	equiv	Mol	Catalyst	Mass (g)	Reagent	MW (g mmol-1)	Mass (g)	Reaction Solvent	Volume (mL)	Density (g.mL-1)	Mass (g)	Work up Chemical	Mass (g)	Workup Solvent	Volume (mL)	Density (g mL-1)	Mass (g)
Reactant C		3,5-Nitrobenzoic acid	4.87991	212.17	1	0.023			PPh3	262.29	6.03267	THF	46	0.889	40.894						0
		Benzyl alcohol	2.48722	108.14	1	0.023			DEAD	174.16	4.00568				0						0
		Total	7.36713	320.31		0.046		0			10.0384				40.894		0				0
										Yield (%)	90
										AE (%)	94.3586						mass (g)	MW	mol
										RME (%)	84.9227					Product	6.25637	302.24	0.0207
										MI total (g g-1)	9.31842
										MI RRC (g g-1)	2.78204
										MI Solvents (g g-1)	6.53638
		METRICS
		Reactant (Limiting Reactant First)	Mass (g)	MW (g mmol-1)	equiv	Mol	Catalyst	Mass (g)	Reagent	MW (g mmol-1)	Mass (g)	Reaction Solvent	Volume (mL)	Density (g.mL-1)	Mass (g)	Work up Chemical	Mass (g)	Workup Solvent	Volume (mL)	Density (g mL-1)	Mass (g)
Reactant D		(2E)-3-[2-chloro-4-(cyclopentyloxy)-5-methoxyphenyl]acrylic acid	7.14771	310.77	1	0.023			PPh3	262.29	6.03267	THF	46	0.889	40.894						0
		Benzyl alcohol	2.48722	108.14	1	0.023			DEAD	174.16	4.00568				0						0
		Total	9.63493	418.91		0.046		0			10.0384				40.894		0				0
										Yield (%)	90
										AE (%)	95.7007						mass (g)	MW	mol
										RME (%)	86.1307					Product	8.29863	400.9	0.0207
										MI total (g g-1)	7.29847
										MI RRC (g g-1)	2.37067
										MI Solvents (g g-1)	4.9278
		METRICS
		Reactant (Limiting Reactant First)	Mass (g)	MW (g mmol-1)	equiv	Mol	Catalyst	Mass (g)	Reagent	MW (g mmol-1)	Mass (g)	Reaction Solvent	Volume (mL)	Density (g.mL-1)	Mass (g)	Work up Chemical	Mass (g)	Workup Solvent	Volume (mL)	Density (g mL-1)	Mass (g)
Reactant E		Fmoc-D-Dab(Boc)-OH	10.1315	440.5	1	0.023			PPh3	262.29	6.03267	THF	46	0.889	40.894						0
		Benzyl alcohol	2.48722	108.14	1	0.023			DEAD	174.16	4.00568				0						0
		Total	12.6187	548.64		0.046		0			10.0383				40.894		0				0
										Yield (%)	90
										AE (%)	96.7155						mass (g)	MW	mol
										RME (%)	87.044					Product	10.9838	530.62	0.0207
										MI total (g g-1)	5.78587
										MI RRC (g g-1)	2.06277
										MI Solvents (g g-1)	3.72311
Simulation 3: Everything 1.0 eq, Conc 1.0 M, yield of 90%
		METRICS
		Reactant (Limiting Reactant First)	Mass (g)	MW (g mmol-1)	equiv	Mol	Catalyst	Mass (g)	Reagent	MW (g mmol-1)	Mass (g)	Reaction Solvent	Volume (mL)	Density (g.mL-1)	Mass (g)	Work up Chemical	Mass (g)	Workup Solvent	Volume (mL)	Density (g mL-1)	Mass (g)
Reactant A		Benzoic acid	2.80876	122.12	1	0.023			PPh3	262.29	6.03267	THF	23	0.889	20.447						0
		Benzyl alcohol	2.48722	108.14	1	0.023			DEAD	174.16	4.00568				0						0
		Total	5.29598	230.26		0.046		0			10.0384				20.447		0				0
										Yield (%)	90
										AE (%)	92.1784						mass (g)	MW	mol
										RME (%)	82.9606					Product	4.39358	212.25	0.0207
										MI total (g g-1)	8.14401
										MI RRC (g g-1)	3.49017
										MI Solvents (g g-1)	4.65384		Conc (M)	1
		METRICS
		Reactant (Limiting Reactant First)	Mass (g)	MW (g mmol-1)	equiv	Mol	Catalyst	Mass (g)	Reagent	MW (g mmol-1)	Mass (g)	Reaction Solvent	Volume (mL)	Density (g.mL-1)	Mass (g)	Work up Chemical	Mass (g)	Workup Solvent	Volume (mL)	Density (g mL-1)	Mass (g)
Reactant B		4-Chlorobenzoic acid	3.60111	156.57	1	0.023			PPh3	262.29	6.03267	THF	23	0.889	20.447						0
		Benzyl alcohol	2.48722	108.14	1	0.023			DEAD	174.16	4.00568				0						0
		Total	6.08833	264.71		0.046		0			10.0384				20.447		0				0
										Yield (%)	90
										AE (%)	93.1926						mass (g)	MW	mol
										RME (%)	83.8733					Product	5.10648	246.69	0.0207
										MI total (g g-1)	7.16221
										MI RRC (g g-1)	3.15808
										MI Solvents (g g-1)	4.00413
		METRICS
		Reactant (Limiting Reactant First)	Mass (g)	MW (g mmol-1)	equiv	Mol	Catalyst	Mass (g)	Reagent	MW (g mmol-1)	Mass (g)	Reaction Solvent	Volume (mL)	Density (g.mL-1)	Mass (g)	Work up Chemical	Mass (g)	Workup Solvent	Volume (mL)	Density (g mL-1)	Mass (g)
Reactant C		3,5-Nitrobenzoic acid	4.87991	212.17	1	0.023			PPh3	262.29	6.03267	THF	23	0.889	20.447						0
		Benzyl alcohol	2.48722	108.14	1	0.023			DEAD	174.16	4.00568				0						0
		Total	7.36713	320.31		0.046		0			10.0384				20.447		0				0
										Yield (%)	90
										AE (%)	94.3586						mass (g)	MW	mol
										RME (%)	84.9227					Product	6.25637	302.24	0.0207
										MI total (g g-1)	6.05023
										MI RRC (g g-1)	2.78204
										MI Solvents (g g-1)	3.26819
		METRICS
		Reactant (Limiting Reactant First)	Mass (g)	MW (g mmol-1)	equiv	Mol	Catalyst	Mass (g)	Reagent	MW (g mmol-1)	Mass (g)	Reaction Solvent	Volume (mL)	Density (g.mL-1)	Mass (g)	Work up Chemical	Mass (g)	Workup Solvent	Volume (mL)	Density (g mL-1)	Mass (g)
Reactant D		(2E)-3-[2-chloro-4-(cyclopentyloxy)-5-methoxyphenyl]acrylic acid	7.14771	310.77	1	0.023			PPh3	262.29	6.03267	THF	23	0.889	20.447						0
		Benzyl alcohol	2.48722	108.14	1	0.023			DEAD	174.16	4.00568				0						0
		Total	9.63493	418.91		0.046		0			10.0384				20.447		0				0
										Yield (%)	90
										AE (%)	95.7007						mass (g)	MW	mol
										RME (%)	86.1307					Product	8.29863	400.9	0.0207
										MI total (g g-1)	4.83457
										MI RRC (g g-1)	2.37067
										MI Solvents (g g-1)	2.4639
		METRICS
		Reactant (Limiting Reactant First)	Mass (g)	MW (g mmol-1)	equiv	Mol	Catalyst	Mass (g)	Reagent	MW (g mmol-1)	Mass (g)	Reaction Solvent	Volume (mL)	Density (g.mL-1)	Mass (g)	Work up Chemical	Mass (g)	Workup Solvent	Volume (mL)	Density (g mL-1)	Mass (g)
Reactant E		Fmoc-D-Dab(Boc)-OH	10.1315	440.5	1	0.023			PPh3	262.29	6.03267	THF	23	0.889	20.447						0
		Benzyl alcohol	2.48722	108.14	1	0.023			DEAD	174.16	4.00568				0						0
		Total	12.6187	548.64		0.046		0			10.0383				20.447		0				0
										Yield (%)	90
										AE (%)	96.7155						mass (g)	MW	mol
										RME (%)	87.044					Product	10.9838	530.62	0.0207
										MI total (g g-1)	3.92432
										MI RRC (g g-1)	2.06277
										MI Solvents (g g-1)	1.86155
Simulation 4: Everything 1.0 eq, Conc 2.0 M, yield of 90%
		METRICS
		Reactant (Limiting Reactant First)	Mass (g)	MW (g mmol-1)	equiv	Mol	Catalyst	Mass (g)	Reagent	MW (g mmol-1)	Mass (g)	Reaction Solvent	Volume (mL)	Density (g.mL-1)	Mass (g)	Work up Chemical	Mass (g)	Workup Solvent	Volume (mL)	Density (g mL-1)	Mass (g)
Reactant A		Benzoic acid	2.80876	122.12	1	0.023			PPh3	262.29	6.03267	THF	11.5	0.889	10.2235						0
		Benzyl alcohol	2.48722	108.14	1	0.023			DEAD	174.16	4.00568				0						0
		Total	5.29598	230.26		0.046		0			10.0384				10.2235		0				0
										Yield (%)	90
										AE (%)	92.1784						mass (g)	MW	mol
										RME (%)	82.9606					Product	4.39358	212.25	0.0207
										MI total (g g-1)	5.81709
										MI RRC (g g-1)	3.49017
										MI Solvents (g g-1)	2.32692		Conc (M)	2
		METRICS
		Reactant (Limiting Reactant First)	Mass (g)	MW (g mmol-1)	equiv	Mol	Catalyst	Mass (g)	Reagent	MW (g mmol-1)	Mass (g)	Reaction Solvent	Volume (mL)	Density (g.mL-1)	Mass (g)	Work up Chemical	Mass (g)	Workup Solvent	Volume (mL)	Density (g mL-1)	Mass (g)
Reactant B		4-Chlorobenzoic acid	3.60111	156.57	1	0.023			PPh3	262.29	6.03267	THF	11.5	0.889	10.2235						0
		Benzyl alcohol	2.48722	108.14	1	0.023			DEAD	174.16	4.00568				0						0
		Total	6.08833	264.71		0.046		0			10.0384				10.2235		0				0
										Yield (%)	90
										AE (%)	93.1926						mass (g)	MW	mol
										RME (%)	83.8733					Product	5.10648	246.69	0.0207
										MI total (g g-1)	5.16014
										MI RRC (g g-1)	3.15808
										MI Solvents (g g-1)	2.00206
		METRICS
		Reactant (Limiting Reactant First)	Mass (g)	MW (g mmol-1)	equiv	Mol	Catalyst	Mass (g)	Reagent	MW (g mmol-1)	Mass (g)	Reaction Solvent	Volume (mL)	Density (g.mL-1)	Mass (g)	Work up Chemical	Mass (g)	Workup Solvent	Volume (mL)	Density (g mL-1)	Mass (g)
Reactant C		3,5-Nitrobenzoic acid	4.87991	212.17	1	0.023			PPh3	262.29	6.03267	THF	11.5	0.889	10.2235						0
		Benzyl alcohol	2.48722	108.14	1	0.023			DEAD	174.16	4.00568				0						0
		Total	7.36713	320.31		0.046		0			10.0384				10.2235		0				0
										Yield (%)	90
										AE (%)	94.3586						mass (g)	MW	mol
										RME (%)	84.9227					Product	6.25637	302.24	0.0207
										MI total (g g-1)	4.41614
										MI RRC (g g-1)	2.78204
										MI Solvents (g g-1)	1.6341
		METRICS
		Reactant (Limiting Reactant First)	Mass (g)	MW (g mmol-1)	equiv	Mol	Catalyst	Mass (g)	Reagent	MW (g mmol-1)	Mass (g)	Reaction Solvent	Volume (mL)	Density (g.mL-1)	Mass (g)	Work up Chemical	Mass (g)	Workup Solvent	Volume (mL)	Density (g mL-1)	Mass (g)
Reactant D		(2E)-3-[2-chloro-4-(cyclopentyloxy)-5-methoxyphenyl]acrylic acid	7.14771	310.77	1	0.023			PPh3	262.29	6.03267	THF	11.5	0.889	10.2235						0
		Benzyl alcohol	2.48722	108.14	1	0.023			DEAD	174.16	4.00568				0						0
		Total	9.63493	418.91		0.046		0			10.0384				10.2235		0				0
										Yield (%)	90
										AE (%)	95.7007						mass (g)	MW	mol
										RME (%)	86.1307					Product	8.29863	400.9	0.0207
										MI total (g g-1)	3.60262
										MI RRC (g g-1)	2.37067
										MI Solvents (g g-1)	1.23195
		METRICS
		Reactant (Limiting Reactant First)	Mass (g)	MW (g mmol-1)	equiv	Mol	Catalyst	Mass (g)	Reagent	MW (g mmol-1)	Mass (g)	Reaction Solvent	Volume (mL)	Density (g.mL-1)	Mass (g)	Work up Chemical	Mass (g)	Workup Solvent	Volume (mL)	Density (g mL-1)	Mass (g)
Reactant E		Fmoc-D-Dab(Boc)-OH	10.1315	440.5	1	0.023			PPh3	262.29	6.03267	THF	11.5	0.889	10.2235						0
		Benzyl alcohol	2.48722	108.14	1	0.023			DEAD	174.16	4.00568				0						0
		Total	12.6187	548.64		0.046		0			10.0383				10.2235		0				0
										Yield (%)	90
										AE (%)	96.7155						mass (g)	MW	mol
										RME (%)	87.044					Product	10.9838	530.62	0.0207
										MI total (g g-1)	2.99354
										MI RRC (g g-1)	2.06277
										MI Solvents (g g-1)	0.930777
			Entry	Substrate	AE	RME	PMI	PMIRRC	PMIsolv
					(%)	(%)	(g g-1)	(g g-1)	(g g-1)
			Simulation 1: Everything 1.0 eq, Conc 0.1 M, yield of 90%
			1	A	92.1784	82.9606	49.8262	3.49017	46.3361
			2	B	93.1926	83.8733	43.0252	3.15808	39.8672
			3	C	94.3586	84.9227	35.3218	2.78204	32.5398
			4	D	95.7007	86.1307	26.9025	2.37067	24.5319
			5	E	96.7155	87.044	20.5974	2.06277	18.5346
			Simulation 2: Everything 1.0 eq, Conc 0.5 M, yield of 90%
			1	A	92.1784	82.9606	12.7979	3.49017	9.30768
			2	B	93.1926	83.8733	11.1663	3.15808	8.00825
			3	C	94.3586	84.9227	9.31842	2.78204	6.53638
			4	D	95.7007	86.1307	7.29847	2.37067	4.9278
			5	E	96.7155	87.044	5.78587	2.06277	3.72311
			Simulation 3: Everything 1.0 eq, Conc 1.0 M, yield of 90%
			1	A	92.1784	82.9606	8.14401	3.49017	4.65384
			2	B	93.1926	83.8733	7.16221	3.15808	4.00413
			3	C	94.3586	84.9227	6.05023	2.78204	3.26819
			4	D	95.7007	86.1307	4.83457	2.37067	2.4639
			5	E	96.7155	87.044	3.92432	2.06277	1.86155
			Simulation 4: Everything 1.0 eq, Conc 2.0 M, yield of 90%
			1	A	92.1784	82.9606	5.81709	3.49017	2.32692
			2	B	93.1926	83.8733	5.16014	3.15808	2.00206
			3	C	94.3586	84.9227	4.41614	2.78204	1.6341
			4	D	95.7007	86.1307	3.60262	2.37067	1.23195
			5	E	96.7155	87.044	2.99354	2.06277	0.930777

## Sheet:  Reactants 1.0 4.0 eq conc
Simulation 1: Limiting 1.0 eq, rest 4.0 eq, Conc 0.1 M, yield of 90%
		METRICS
		Reactant (Limiting Reactant First)	Mass (g)	MW (g mmol-1)	equiv	Mol	Catalyst	Mass (g)	Reagent	MW (g mmol-1)	Mass (g)	Reaction Solvent	Volume (mL)	Density (g.mL-1)	Mass (g)	Work up Chemical	Mass (g)	Workup Solvent	Volume (mL)	Density (g mL-1)	Mass (g)
Reactant A		Benzoic acid	2.80876	122.12	1	0.023			PPh3	262.29	24.1307	THF	229	0.889	203.581						0
		Benzyl alcohol	9.94888	108.14	4	0.092			DEAD	174.16	16.0227				0						0
		Total	12.7576	230.26		0.115		0			40.1534				203.581		0				0
										Yield (%)	90
										AE (%)	92.1784						mass (g)	MW	mol
										RME (%)	34.4388					Product	4.39358	212.25	0.0207
										MI total (g g-1)	58.3789
										MI RRC (g g-1)	12.0428
										MI Solvents (g g-1)	46.3361		Conc (M)	0.100437
		METRICS
		Reactant (Limiting Reactant First)	Mass (g)	MW (g mmol-1)	equiv	Mol	Catalyst	Mass (g)	Reagent	MW (g mmol-1)	Mass (g)	Reaction Solvent	Volume (mL)	Density (g.mL-1)	Mass (g)	Work up Chemical	Mass (g)	Workup Solvent	Volume (mL)	Density (g mL-1)	Mass (g)
Reactant B		4-Chlorobenzoic acid	3.60111	156.57	1	0.023			PPh3	262.29	24.1307	THF	229	0.889	203.581						0
		Benzyl alcohol	9.94888	108.14	4	0.092			DEAD	174.16	16.0227				0						0
		Total	13.55	264.71		0.115		0			40.1534				203.581		0				0
										Yield (%)	90
										AE (%)	93.1926						mass (g)	MW	mol
										RME (%)	37.6862					Product	5.10648	246.69	0.0207
										MI total (g g-1)	50.3839
										MI RRC (g g-1)	10.5167
										MI Solvents (g g-1)	39.8672
		METRICS
		Reactant (Limiting Reactant First)	Mass (g)	MW (g mmol-1)	equiv	Mol	Catalyst	Mass (g)	Reagent	MW (g mmol-1)	Mass (g)	Reaction Solvent	Volume (mL)	Density (g.mL-1)	Mass (g)	Work up Chemical	Mass (g)	Workup Solvent	Volume (mL)	Density (g mL-1)	Mass (g)
Reactant C		3,5-Nitrobenzoic acid	4.87991	212.17	1	0.023			PPh3	262.29	24.1307	THF	229	0.889	203.581						0
		Benzyl alcohol	9.94888	108.14	4	0.092			DEAD	174.16	16.0227				0						0
		Total	14.8288	320.31		0.115		0			40.1534				203.581		0				0
										Yield (%)	90
										AE (%)	94.3586						mass (g)	MW	mol
										RME (%)	42.1907					Product	6.25637	302.24	0.0207
										MI total (g g-1)	41.328
										MI RRC (g g-1)	8.7882
										MI Solvents (g g-1)	32.5398
		METRICS
		Reactant (Limiting Reactant First)	Mass (g)	MW (g mmol-1)	equiv	Mol	Catalyst	Mass (g)	Reagent	MW (g mmol-1)	Mass (g)	Reaction Solvent	Volume (mL)	Density (g.mL-1)	Mass (g)	Work up Chemical	Mass (g)	Workup Solvent	Volume (mL)	Density (g mL-1)	Mass (g)
Reactant D		(2E)-3-[2-chloro-4-(cyclopentyloxy)-5-methoxyphenyl]acrylic acid	7.14771	310.77	1	0.023			PPh3	262.29	24.1307	THF	229	0.889	203.581						0
		Benzyl alcohol	9.94888	108.14	4	0.092			DEAD	174.16	16.0227				0						0
		Total	17.0966	418.91		0.115		0			40.1534				203.581		0				0
										Yield (%)	90
										AE (%)	95.7007						mass (g)	MW	mol
										RME (%)	48.5397					Product	8.29863	400.9	0.0207
										MI total (g g-1)	31.4306
										MI RRC (g g-1)	6.89873
										MI Solvents (g g-1)	24.5319
		METRICS
		Reactant (Limiting Reactant First)	Mass (g)	MW (g mmol-1)	equiv	Mol	Catalyst	Mass (g)	Reagent	MW (g mmol-1)	Mass (g)	Reaction Solvent	Volume (mL)	Density (g.mL-1)	Mass (g)	Work up Chemical	Mass (g)	Workup Solvent	Volume (mL)	Density (g mL-1)	Mass (g)
Reactant E		Fmoc-D-Dab(Boc)-OH	10.1315	440.5	1	0.023			PPh3	262.29	24.1307	THF	229	0.889	203.581						0
		Benzyl alcohol	9.94888	108.14	4	0.092			DEAD	174.16	16.0227				0						0
		Total	20.0804	548.64		0.115		0			40.1534				203.581		0				0
										Yield (%)	90
										AE (%)	96.7155						mass (g)	MW	mol
										RME (%)	54.6993					Product	10.9838	530.62	0.0207
										MI total (g g-1)	24.0185
										MI RRC (g g-1)	5.48386
										MI Solvents (g g-1)	18.5346
Simulation 2: Limiting 1.0 eq, rest 4.0 eq, Conc 0.5 M, yield of 90%
		METRICS
		Reactant (Limiting Reactant First)	Mass (g)	MW (g mmol-1)	equiv	Mol	Catalyst	Mass (g)	Reagent	MW (g mmol-1)	Mass (g)	Reaction Solvent	Volume (mL)	Density (g.mL-1)	Mass (g)	Work up Chemical	Mass (g)	Workup Solvent	Volume (mL)	Density (g mL-1)	Mass (g)
Reactant A		Benzoic acid	2.80876	122.12	1	0.023			PPh3	262.29	24.1307	THF	46	0.889	40.894						0
		Benzyl alcohol	9.94888	108.14	4	0.092			DEAD	174.16	16.0227				0						0
		Total	12.7576	230.26		0.115		0			40.1534				40.894		0				0
										Yield (%)	90
										AE (%)	92.1784						mass (g)	MW	mol
										RME (%)	34.4388					Product	4.39358	212.25	0.0207
										MI total (g g-1)	21.3505
										MI RRC (g g-1)	12.0428
										MI Solvents (g g-1)	9.30768		Conc (M)	0.5
		METRICS
		Reactant (Limiting Reactant First)	Mass (g)	MW (g mmol-1)	equiv	Mol	Catalyst	Mass (g)	Reagent	MW (g mmol-1)	Mass (g)	Reaction Solvent	Volume (mL)	Density (g.mL-1)	Mass (g)	Work up Chemical	Mass (g)	Workup Solvent	Volume (mL)	Density (g mL-1)	Mass (g)
Reactant B		4-Chlorobenzoic acid	3.60111	156.57	1	0.023			PPh3	262.29	24.1307	THF	46	0.889	40.894						0
		Benzyl alcohol	9.94888	108.14	4	0.092			DEAD	174.16	16.0227				0						0
		Total	13.55	264.71		0.115		0			40.1534				40.894		0				0
										Yield (%)	90
										AE (%)	93.1926						mass (g)	MW	mol
										RME (%)	37.6862					Product	5.10648	246.69	0.0207
										MI total (g g-1)	18.525
										MI RRC (g g-1)	10.5167
										MI Solvents (g g-1)	8.00825
		METRICS
		Reactant (Limiting Reactant First)	Mass (g)	MW (g mmol-1)	equiv	Mol	Catalyst	Mass (g)	Reagent	MW (g mmol-1)	Mass (g)	Reaction Solvent	Volume (mL)	Density (g.mL-1)	Mass (g)	Work up Chemical	Mass (g)	Workup Solvent	Volume (mL)	Density (g mL-1)	Mass (g)
Reactant C		3,5-Nitrobenzoic acid	4.87991	212.17	1	0.023			PPh3	262.29	24.1307	THF	46	0.889	40.894						0
		Benzyl alcohol	9.94888	108.14	4	0.092			DEAD	174.16	16.0227				0						0
		Total	14.8288	320.31		0.115		0			40.1534				40.894		0				0
										Yield (%)	90
										AE (%)	94.3586						mass (g)	MW	mol
										RME (%)	42.1907					Product	6.25637	302.24	0.0207
										MI total (g g-1)	15.3246
										MI RRC (g g-1)	8.7882
										MI Solvents (g g-1)	6.53638
		METRICS
		Reactant (Limiting Reactant First)	Mass (g)	MW (g mmol-1)	equiv	Mol	Catalyst	Mass (g)	Reagent	MW (g mmol-1)	Mass (g)	Reaction Solvent	Volume (mL)	Density (g.mL-1)	Mass (g)	Work up Chemical	Mass (g)	Workup Solvent	Volume (mL)	Density (g mL-1)	Mass (g)
Reactant D		(2E)-3-[2-chloro-4-(cyclopentyloxy)-5-methoxyphenyl]acrylic acid	7.14771	310.77	1	0.023			PPh3	262.29	24.1307	THF	46	0.889	40.894						0
		Benzyl alcohol	9.94888	108.14	4	0.092			DEAD	174.16	16.0227				0						0
		Total	17.0966	418.91		0.115		0			40.1534				40.894		0				0
										Yield (%)	90
										AE (%)	95.7007						mass (g)	MW	mol
										RME (%)	48.5397					Product	8.29863	400.9	0.0207
										MI total (g g-1)	11.8265
										MI RRC (g g-1)	6.89873
										MI Solvents (g g-1)	4.9278
		METRICS
		Reactant (Limiting Reactant First)	Mass (g)	MW (g mmol-1)	equiv	Mol	Catalyst	Mass (g)	Reagent	MW (g mmol-1)	Mass (g)	Reaction Solvent	Volume (mL)	Density (g.mL-1)	Mass (g)	Work up Chemical	Mass (g)	Workup Solvent	Volume (mL)	Density (g mL-1)	Mass (g)
Reactant E		Fmoc-D-Dab(Boc)-OH	10.1315	440.5	1	0.023			PPh3	262.29	24.1307	THF	46	0.889	40.894						0
		Benzyl alcohol	9.94888	108.14	4	0.092			DEAD	174.16	16.0227				0						0
		Total	20.0804	548.64		0.115		0			40.1534				40.894		0				0
										Yield (%)	90
										AE (%)	96.7155						mass (g)	MW	mol
										RME (%)	54.6993					Product	10.9838	530.62	0.0207
										MI total (g g-1)	9.20697
										MI RRC (g g-1)	5.48386
										MI Solvents (g g-1)	3.72311
Simulation 3: Limiting 1.0 eq, rest 4.0 eq, Conc 1.0 M, yield of 90%
		METRICS
		Reactant (Limiting Reactant First)	Mass (g)	MW (g mmol-1)	equiv	Mol	Catalyst	Mass (g)	Reagent	MW (g mmol-1)	Mass (g)	Reaction Solvent	Volume (mL)	Density (g.mL-1)	Mass (g)	Work up Chemical	Mass (g)	Workup Solvent	Volume (mL)	Density (g mL-1)	Mass (g)
Reactant A		Benzoic acid	2.80876	122.12	1	0.023			PPh3	262.29	24.1307	THF	23	0.889	20.447						0
		Benzyl alcohol	9.94888	108.14	4	0.092			DEAD	174.16	16.0227				0						0
		Total	12.7576	230.26		0.115		0			40.1534				20.447		0				0
										Yield (%)	90
										AE (%)	92.1784						mass (g)	MW	mol
										RME (%)	34.4388					Product	4.39358	212.25	0.0207
										MI total (g g-1)	16.6967
										MI RRC (g g-1)	12.0428
										MI Solvents (g g-1)	4.65384		Conc (M)	1
		METRICS
		Reactant (Limiting Reactant First)	Mass (g)	MW (g mmol-1)	equiv	Mol	Catalyst	Mass (g)	Reagent	MW (g mmol-1)	Mass (g)	Reaction Solvent	Volume (mL)	Density (g.mL-1)	Mass (g)	Work up Chemical	Mass (g)	Workup Solvent	Volume (mL)	Density (g mL-1)	Mass (g)
Reactant B		4-Chlorobenzoic acid	3.60111	156.57	1	0.023			PPh3	262.29	24.1307	THF	23	0.889	20.447						0
		Benzyl alcohol	9.94888	108.14	4	0.092			DEAD	174.16	16.0227				0						0
		Total	13.55	264.71		0.115		0			40.1534				20.447		0				0
										Yield (%)	90
										AE (%)	93.1926						mass (g)	MW	mol
										RME (%)	37.6862					Product	5.10648	246.69	0.0207
										MI total (g g-1)	14.5208
										MI RRC (g g-1)	10.5167
										MI Solvents (g g-1)	4.00413
		METRICS
		Reactant (Limiting Reactant First)	Mass (g)	MW (g mmol-1)	equiv	Mol	Catalyst	Mass (g)	Reagent	MW (g mmol-1)	Mass (g)	Reaction Solvent	Volume (mL)	Density (g.mL-1)	Mass (g)	Work up Chemical	Mass (g)	Workup Solvent	Volume (mL)	Density (g mL-1)	Mass (g)
Reactant C		3,5-Nitrobenzoic acid	4.87991	212.17	1	0.023			PPh3	262.29	24.1307	THF	23	0.889	20.447						0
		Benzyl alcohol	9.94888	108.14	4	0.092			DEAD	174.16	16.0227				0						0
		Total	14.8288	320.31		0.115		0			40.1534				20.447		0				0
										Yield (%)	90
										AE (%)	94.3586						mass (g)	MW	mol
										RME (%)	42.1907					Product	6.25637	302.24	0.0207
										MI total (g g-1)	12.0564
										MI RRC (g g-1)	8.7882
										MI Solvents (g g-1)	3.26819
		METRICS
		Reactant (Limiting Reactant First)	Mass (g)	MW (g mmol-1)	equiv	Mol	Catalyst	Mass (g)	Reagent	MW (g mmol-1)	Mass (g)	Reaction Solvent	Volume (mL)	Density (g.mL-1)	Mass (g)	Work up Chemical	Mass (g)	Workup Solvent	Volume (mL)	Density (g mL-1)	Mass (g)
Reactant D		(2E)-3-[2-chloro-4-(cyclopentyloxy)-5-methoxyphenyl]acrylic acid	7.14771	310.77	1	0.023			PPh3	262.29	24.1307	THF	23	0.889	20.447						0
		Benzyl alcohol	9.94888	108.14	4	0.092			DEAD	174.16	16.0227				0						0
		Total	17.0966	418.91		0.115		0			40.1534				20.447		0				0
										Yield (%)	90
										AE (%)	95.7007						mass (g)	MW	mol
										RME (%)	48.5397					Product	8.29863	400.9	0.0207
										MI total (g g-1)	9.36263
										MI RRC (g g-1)	6.89873
										MI Solvents (g g-1)	2.4639
		METRICS
		Reactant (Limiting Reactant First)	Mass (g)	MW (g mmol-1)	equiv	Mol	Catalyst	Mass (g)	Reagent	MW (g mmol-1)	Mass (g)	Reaction Solvent	Volume (mL)	Density (g.mL-1)	Mass (g)	Work up Chemical	Mass (g)	Workup Solvent	Volume (mL)	Density (g mL-1)	Mass (g)
Reactant E		Fmoc-D-Dab(Boc)-OH	10.1315	440.5	1	0.023			PPh3	262.29	24.1307	THF	23	0.889	20.447						0
		Benzyl alcohol	9.94888	108.14	4	0.092			DEAD	174.16	16.0227				0						0
		Total	20.0804	548.64		0.115		0			40.1534				20.447		0				0
										Yield (%)	90
										AE (%)	96.7155						mass (g)	MW	mol
										RME (%)	54.6993					Product	10.9838	530.62	0.0207
										MI total (g g-1)	7.34541
										MI RRC (g g-1)	5.48386
										MI Solvents (g g-1)	1.86155
Simulation 4: Limiting 1.0 eq, rest 4.0 eq, Conc 2.0 M, yield of 90%
		METRICS
		Reactant (Limiting Reactant First)	Mass (g)	MW (g mmol-1)	equiv	Mol	Catalyst	Mass (g)	Reagent	MW (g mmol-1)	Mass (g)	Reaction Solvent	Volume (mL)	Density (g.mL-1)	Mass (g)	Work up Chemical	Mass (g)	Workup Solvent	Volume (mL)	Density (g mL-1)	Mass (g)
Reactant A		Benzoic acid	2.80876	122.12	1	0.023			PPh3	262.29	24.1307	THF	11.5	0.889	10.2235						0
		Benzyl alcohol	9.94888	108.14	4	0.092			DEAD	174.16	16.0227				0						0
		Total	12.7576	230.26		0.115		0			40.1534				10.2235		0				0
										Yield (%)	90
										AE (%)	92.1784						mass (g)	MW	mol
										RME (%)	34.4388					Product	4.39358	212.25	0.0207
										MI total (g g-1)	14.3697
										MI RRC (g g-1)	12.0428
										MI Solvents (g g-1)	2.32692		Conc (M)	2
		METRICS
		Reactant (Limiting Reactant First)	Mass (g)	MW (g mmol-1)	equiv	Mol	Catalyst	Mass (g)	Reagent	MW (g mmol-1)	Mass (g)	Reaction Solvent	Volume (mL)	Density (g.mL-1)	Mass (g)	Work up Chemical	Mass (g)	Workup Solvent	Volume (mL)	Density (g mL-1)	Mass (g)
Reactant B		4-Chlorobenzoic acid	3.60111	156.57	1	0.023			PPh3	262.29	24.1307	THF	11.5	0.889	10.2235						0
		Benzyl alcohol	9.94888	108.14	4	0.092			DEAD	174.16	16.0227				0						0
		Total	13.55	264.71		0.115		0			40.1534				10.2235		0				0
										Yield (%)	90
										AE (%)	93.1926						mass (g)	MW	mol
										RME (%)	37.6862					Product	5.10648	246.69	0.0207
										MI total (g g-1)	12.5188
										MI RRC (g g-1)	10.5167
										MI Solvents (g g-1)	2.00206
		METRICS
		Reactant (Limiting Reactant First)	Mass (g)	MW (g mmol-1)	equiv	Mol	Catalyst	Mass (g)	Reagent	MW (g mmol-1)	Mass (g)	Reaction Solvent	Volume (mL)	Density (g.mL-1)	Mass (g)	Work up Chemical	Mass (g)	Workup Solvent	Volume (mL)	Density (g mL-1)	Mass (g)
Reactant C		3,5-Nitrobenzoic acid	4.87991	212.17	1	0.023			PPh3	262.29	24.1307	THF	11.5	0.889	10.2235						0
		Benzyl alcohol	9.94888	108.14	4	0.092			DEAD	174.16	16.0227				0						0
		Total	14.8288	320.31		0.115		0			40.1534				10.2235		0				0
										Yield (%)	90
										AE (%)	94.3586						mass (g)	MW	mol
										RME (%)	42.1907					Product	6.25637	302.24	0.0207
										MI total (g g-1)	10.4223
										MI RRC (g g-1)	8.7882
										MI Solvents (g g-1)	1.6341
		METRICS
		Reactant (Limiting Reactant First)	Mass (g)	MW (g mmol-1)	equiv	Mol	Catalyst	Mass (g)	Reagent	MW (g mmol-1)	Mass (g)	Reaction Solvent	Volume (mL)	Density (g.mL-1)	Mass (g)	Work up Chemical	Mass (g)	Workup Solvent	Volume (mL)	Density (g mL-1)	Mass (g)
Reactant D		(2E)-3-[2-chloro-4-(cyclopentyloxy)-5-methoxyphenyl]acrylic acid	7.14771	310.77	1	0.023			PPh3	262.29	24.1307	THF	11.5	0.889	10.2235						0
		Benzyl alcohol	9.94888	108.14	4	0.092			DEAD	174.16	16.0227				0						0
		Total	17.0966	418.91		0.115		0			40.1534				10.2235		0				0
										Yield (%)	90
										AE (%)	95.7007						mass (g)	MW	mol
										RME (%)	48.5397					Product	8.29863	400.9	0.0207
										MI total (g g-1)	8.13068
										MI RRC (g g-1)	6.89873
										MI Solvents (g g-1)	1.23195
		METRICS
		Reactant (Limiting Reactant First)	Mass (g)	MW (g mmol-1)	equiv	Mol	Catalyst	Mass (g)	Reagent	MW (g mmol-1)	Mass (g)	Reaction Solvent	Volume (mL)	Density (g.mL-1)	Mass (g)	Work up Chemical	Mass (g)	Workup Solvent	Volume (mL)	Density (g mL-1)	Mass (g)
Reactant E		Fmoc-D-Dab(Boc)-OH	10.1315	440.5	1	0.023			PPh3	262.29	24.1307	THF	11.5	0.889	10.2235						0
		Benzyl alcohol	9.94888	108.14	4	0.092			DEAD	174.16	16.0227				0						0
		Total	20.0804	548.64		0.115		0			40.1534				10.2235		0				0
										Yield (%)	90
										AE (%)	96.7155						mass (g)	MW	mol
										RME (%)	54.6993					Product	10.9838	530.62	0.0207
										MI total (g g-1)	6.41463
										MI RRC (g g-1)	5.48386
										MI Solvents (g g-1)	0.930777
			Entry	Substrate	AE	RME	PMI	PMIRRC	PMIsolv
					(%)	(%)	(g g-1)	(g g-1)	(g g-1)
			Simulation 1: Limiting 1.0 eq, rest 4.0 eq, Conc 0.1 M, yield of 90%
			1	A	92.1784	34.4388	58.3789	12.0428	46.3361
			2	B	93.1926	37.6862	50.3839	10.5167	39.8672
			3	C	94.3586	42.1907	41.328	8.7882	32.5398
			4	D	95.7007	48.5397	31.4306	6.89873	24.5319
			5	E	96.7155	54.6993	24.0185	5.48386	18.5346
			Simulation 2: Limiting 1.0 eq, rest 4.0 eq, Conc 0.5 M, yield of 90%
			1	A	92.1784	34.4388	21.3505	12.0428	9.30768
			2	B	93.1926	37.6862	18.525	10.5167	8.00825
			3	C	94.3586	42.1907	15.3246	8.7882	6.53638
			4	D	95.7007	48.5397	11.8265	6.89873	4.9278
			5	E	96.7155	54.6993	9.20697	5.48386	3.72311
			Simulation 3: Limiting 1.0 eq, rest 4.0 eq, Conc 1.0 M, yield of 90%
			1	A	92.1784	34.4388	16.6967	12.0428	4.65384
			2	B	93.1926	37.6862	14.5208	10.5167	4.00413
			3	C	94.3586	42.1907	12.0564	8.7882	3.26819
			4	D	95.7007	48.5397	9.36263	6.89873	2.4639
			5	E	96.7155	54.6993	7.34541	5.48386	1.86155
			Simulation 4: Limiting 1.0 eq, rest 4.0 eq, Conc 2.0 M, yield of 90%
			1	A	92.1784	34.4388	14.3697	12.0428	2.32692
			2	B	93.1926	37.6862	12.5188	10.5167	2.00206
			3	C	94.3586	42.1907	10.4223	8.7882	1.6341
			4	D	95.7007	48.5397	8.13068	6.89873	1.23195
			5	E	96.7155	54.6993	6.41463	5.48386	0.930777

## Sheet: DEAD 0.1 eq, PhI(OAc)2 2.0 eq
Literature conditions:
		JACS, 2006, 128, 9636-9637
									To 4-nitrobenzoic acid (0.33 g, 1.98 mmol) and 2-phenylethanol (0.21 mL, 1.8 mmol) in anhydrous THF (15 mL), was added triphenylphosphine (0.94 g, 3.6 mmol), diethyl azodicarboxylate (0.028 mL, 0.18 mmol), and iodosobenzene diacetate (1.16 g, 3.6 mmol). The reaction was stirred at rt for 16 h and then the reaction mixture was diluted with diethyl ether (30 mL). The organic phase was washed with s…
		METRICS
		Reactant (Limiting Reactant First)	Mass (g)	MW (g mmol-1)	equiv	Mol	Catalyst	Mass (g)	Reagent	MW (g mmol-1)	Mass (g)	Reaction Solvent	Volume (mL)	Density (g.mL-1)	Mass (g)	Work up Chemical	Mass (g)	Workup Solvent	Volume (mL)	Density (g mL-1)	Mass (g)
		Phenylethanol	0.219906	122.17	1	0.0018	DEAD	0.03	PPh3	262.29	0.94	THF	15	0.889	13.335						0
		4-Nitrobenzoic acid	0.330898	167.12	1.1	0.00198			PhI(OAc)2	322.1	1.16				0						0
		Total	0.550804	289.29		0.00378		0.03			2.1				13.335		0				0
										Yield (%)	90
										AE (%)	93.771						mass (g)	MW	mol
										RME (%)	79.7848					Product	0.439457	271.27	0.00162
										MI total (g g-1)	36.4445
										MI RRC (g g-1)	6.10026
										MI Solvents (g g-1)	30.3442		Conc (M)	0.12
Literature conditions altered to equal our simulation conditions - Excess reagent 1.2eq from 1.1eq, PPh3 1.2eq from 2.0eq, Conc 0.4 M from 0.12 M, DEAD replaced with DCPEAC both 0.1 eq
		METRICS
		Reactant (Limiting Reactant First)	Mass (g)	MW (g mmol-1)	equiv	Mol	Catalyst	Mass (g)	Reagent	MW (g mmol-1)	Mass (g)	Reaction Solvent	Volume (mL)	Density (g.mL-1)	Mass (g)	Work up Chemical	Mass (g)	Workup Solvent	Volume (mL)	Density (g mL-1)	Mass (g)
		4-Nitrobenzoic acid	0.300816	167.12	1	0.0018	DCPEAC	0.0493344	PPh3	262.29	0.566546	THF	4.5	0.889	4.0005						0
		Phenylethanol	0.263887	122.17	1.2	0.00216			PhI(OAc)2	322.1	1.15956				0						0
		Total	0.564703	289.29		0.00396		0.0493344			1.72611				4.0005		0				0
										Yield (%)	90
										AE (%)	93.771						mass (g)	MW	mol
										RME (%)	77.821					Product	0.439457	271.27	0.00162
										MI total (g g-1)	14.4283
										MI RRC (g g-1)	5.32508
										MI Solvents (g g-1)	9.10327		Conc (M)	0.4
Simulation 1: PPh3 1.2 eq, DCPEAC 0.1 eq, PhI(OAc)2 2.0 eq, Conc 0.4 M, yield of 90%
		METRICS
		Reactant (Limiting Reactant First)	Mass (g)	MW (g mmol-1)	equiv	Mol	Catalyst	Mass (g)	Reagent	MW (g mmol-1)	Mass (g)	Reaction Solvent	Volume (mL)	Density (g.mL-1)	Mass (g)	Work up Chemical	Mass (g)	Workup Solvent	Volume (mL)	Density (g mL-1)	Mass (g)
Reactant A		Benzoic acid	2.80876	122.12	1	0.023	DCPEAC	0.630384	PPh3	262.29	7.2392	THF	57.5	0.889	51.1175						0
		Benzyl alcohol	2.98466	108.14	1.2	0.0276			PhI(OAc)2	322.1	14.8166				0						0
		Total	5.79342	230.26		0.0506		0.630384			22.0558				51.1175		0				0
										Yield (%)	90
										AE (%)	92.1784						mass (g)	MW	mol
										RME (%)	75.8373					Product	4.39358	212.25	0.0207
										MI total (g g-1)	18.1167
										MI RRC (g g-1)	6.4821
										MI Solvents (g g-1)	11.6346		Conc (M)	0.4
		METRICS
		Reactant (Limiting Reactant First)	Mass (g)	MW (g mmol-1)	equiv	Mol	Catalyst	Mass (g)	Reagent	MW (g mmol-1)	Mass (g)	Reaction Solvent	Volume (mL)	Density (g.mL-1)	Mass (g)	Work up Chemical	Mass (g)	Workup Solvent	Volume (mL)	Density (g mL-1)	Mass (g)
Reactant B		4-Chlorobenzoic acid	3.60111	156.57	1	0.023	DCPEAC	0.630384	PPh3	262.29	7.2392	THF	57.5	0.889	51.1175						0
		Benzyl alcohol	2.98466	108.14	1.2	0.0276			PhI(OAc)2	322.1	14.8166				0						0
		Total	6.58577	264.71		0.0506		0.630384			22.0558				51.1175		0				0
										Yield (%)	90
										AE (%)	93.1926						mass (g)	MW	mol
										RME (%)	77.5381					Product	5.10648	246.69	0.0207
										MI total (g g-1)	15.7426
										MI RRC (g g-1)	5.73231
										MI Solvents (g g-1)	10.0103		Conc (M)	0.4
		METRICS
		Reactant (Limiting Reactant First)	Mass (g)	MW (g mmol-1)	equiv	Mol	Catalyst	Mass (g)	Reagent	MW (g mmol-1)	Mass (g)	Reaction Solvent	Volume (mL)	Density (g.mL-1)	Mass (g)	Work up Chemical	Mass (g)	Workup Solvent	Volume (mL)	Density (g mL-1)	Mass (g)
Reactant C		3,5-Nitrobenzoic acid	4.87991	212.17	1	0.023	DCPEAC	0.630384	PPh3	262.29	7.2392	THF	57.5	0.889	51.1175						0
		Benzyl alcohol	2.98466	108.14	1.2	0.0276			PhI(OAc)2	322.1	14.8166				0						0
		Total	7.86457	320.31		0.0506		0.630384			22.0558				51.1175		0				0
										Yield (%)	90
										AE (%)	94.3586						mass (g)	MW	mol
										RME (%)	79.5513					Product	6.25637	302.24	0.0207
										MI total (g g-1)	13.0536
										MI RRC (g g-1)	4.88315
										MI Solvents (g g-1)	8.17048		Conc (M)	0.4
		METRICS
		Reactant (Limiting Reactant First)	Mass (g)	MW (g mmol-1)	equiv	Mol	Catalyst	Mass (g)	Reagent	MW (g mmol-1)	Mass (g)	Reaction Solvent	Volume (mL)	Density (g.mL-1)	Mass (g)	Work up Chemical	Mass (g)	Workup Solvent	Volume (mL)	Density (g mL-1)	Mass (g)
Reactant D		(2E)-3-[2-chloro-4-(cyclopentyloxy)-5-methoxyphenyl]acrylic acid	7.14771	310.77	1	0.023	DCPEAC	0.630384	PPh3	262.29	7.2392	THF	57.5	0.889	51.1175						0
		Benzyl alcohol	2.98466	108.14	1.2	0.0276			PhI(OAc)2	322.1	14.8166				0						0
		Total	10.1324	418.91		0.0506		0.630384			22.0558				51.1175		0				0
										Yield (%)	90
										AE (%)	95.7007						mass (g)	MW	mol
										RME (%)	81.9021					Product	8.29863	400.9	0.0207
										MI total (g g-1)	10.1144
										MI RRC (g g-1)	3.9547
										MI Solvents (g g-1)	6.15975		Conc (M)	0.4
		METRICS
		Reactant (Limiting Reactant First)	Mass (g)	MW (g mmol-1)	equiv	Mol	Catalyst	Mass (g)	Reagent	MW (g mmol-1)	Mass (g)	Reaction Solvent	Volume (mL)	Density (g.mL-1)	Mass (g)	Work up Chemical	Mass (g)	Workup Solvent	Volume (mL)	Density (g mL-1)	Mass (g)
Reactant E		Fmoc-D-Dab(Boc)-OH	10.1315	440.5	1	0.023	DCPEAC	0.630384	PPh3	262.29	7.2392	THF	57.5	0.889	51.1175						0
		Benzyl alcohol	2.98466	108.14	1.2	0.0276			PhI(OAc)2	322.1	14.8166				0						0
		Total	13.1162	548.64		0.0506		0.630384			22.0558				51.1175		0				0
										Yield (%)	90
										AE (%)	96.7155						mass (g)	MW	mol
										RME (%)	83.7427					Product	10.9838	530.62	0.0207
										MI total (g g-1)	7.91343
										MI RRC (g g-1)	3.25955
										MI Solvents (g g-1)	4.65388		Conc (M)	0.4
Simulation 2: PPh3 1.2 eq, DCPEAC 0.1 eq, PhI(OAc)2 2.0 eq, Conc 0.4 M, yield of 80%
		METRICS
		Reactant (Limiting Reactant First)	Mass (g)	MW (g mmol-1)	equiv	Mol	Catalyst	Mass (g)	Reagent	MW (g mmol-1)	Mass (g)	Reaction Solvent	Volume (mL)	Density (g.mL-1)	Mass (g)	Work up Chemical	Mass (g)	Workup Solvent	Volume (mL)	Density (g mL-1)	Mass (g)
Reactant A		Benzoic acid	2.80876	122.12	1	0.023	DCPEAC	0.630384	PPh3	262.29	7.2392	THF	57.5	0.889	51.1175						0
		Benzyl alcohol	2.98466	108.14	1.2	0.0276			PhI(OAc)2	322.1	14.8166				0						0
		Total	5.79342	230.26		0.0506		0.630384			22.0558				51.1175		0				0
										Yield (%)	80
										AE (%)	92.1784						mass (g)	MW	mol
										RME (%)	67.4109					Product	3.9054	212.25	0.0184
										MI total (g g-1)	20.3813
										MI RRC (g g-1)	7.29237
										MI Solvents (g g-1)	13.0889		Conc (M)	0.4
		METRICS
		Reactant (Limiting Reactant First)	Mass (g)	MW (g mmol-1)	equiv	Mol	Catalyst	Mass (g)	Reagent	MW (g mmol-1)	Mass (g)	Reaction Solvent	Volume (mL)	Density (g.mL-1)	Mass (g)	Work up Chemical	Mass (g)	Workup Solvent	Volume (mL)	Density (g mL-1)	Mass (g)
Reactant B		4-Chlorobenzoic acid	3.60111	156.57	1	0.023	DCPEAC	0.630384	PPh3	262.29	7.2392	THF	57.5	0.889	51.1175						0
		Benzyl alcohol	2.98466	108.14	1.2	0.0276			PhI(OAc)2	322.1	14.8166				0						0
		Total	6.58577	264.71		0.0506		0.630384			22.0558				51.1175		0				0
										Yield (%)	80
										AE (%)	93.1926						mass (g)	MW	mol
										RME (%)	68.9227					Product	4.5391	246.69	0.0184
										MI total (g g-1)	17.7105
										MI RRC (g g-1)	6.44885
										MI Solvents (g g-1)	11.2616
		METRICS
		Reactant (Limiting Reactant First)	Mass (g)	MW (g mmol-1)	equiv	Mol	Catalyst	Mass (g)	Reagent	MW (g mmol-1)	Mass (g)	Reaction Solvent	Volume (mL)	Density (g.mL-1)	Mass (g)	Work up Chemical	Mass (g)	Workup Solvent	Volume (mL)	Density (g mL-1)	Mass (g)
Reactant C		3,5-Nitrobenzoic acid	4.87991	212.17	1	0.023	DCPEAC	0.630384	PPh3	262.29	7.2392	THF	57.5	0.889	51.1175						0
		Benzyl alcohol	2.98466	108.14	1.2	0.0276			PhI(OAc)2	322.1	14.8166				0						0
		Total	7.86457	320.31		0.0506		0.630384			22.0558				51.1175		0				0
										Yield (%)	80
										AE (%)	94.3586						mass (g)	MW	mol
										RME (%)	70.7122					Product	5.56122	302.24	0.0184
										MI total (g g-1)	14.6853
										MI RRC (g g-1)	5.49354
										MI Solvents (g g-1)	9.19178
		METRICS
		Reactant (Limiting Reactant First)	Mass (g)	MW (g mmol-1)	equiv	Mol	Catalyst	Mass (g)	Reagent	MW (g mmol-1)	Mass (g)	Reaction Solvent	Volume (mL)	Density (g.mL-1)	Mass (g)	Work up Chemical	Mass (g)	Workup Solvent	Volume (mL)	Density (g mL-1)	Mass (g)
Reactant D		(2E)-3-[2-chloro-4-(cyclopentyloxy)-5-methoxyphenyl]acrylic acid	7.14771	310.77	1	0.023	DCPEAC	0.630384	PPh3	262.29	7.2392	THF	57.5	0.889	51.1175						0
		Benzyl alcohol	2.98466	108.14	1.2	0.0276			PhI(OAc)2	322.1	14.8166				0						0
		Total	10.1324	418.91		0.0506		0.630384			22.0558				51.1175		0				0
										Yield (%)	80
										AE (%)	95.7007						mass (g)	MW	mol
										RME (%)	72.8019					Product	7.37656	400.9	0.0184
										MI total (g g-1)	11.3788
										MI RRC (g g-1)	4.44903
										MI Solvents (g g-1)	6.92972
		METRICS
		Reactant (Limiting Reactant First)	Mass (g)	MW (g mmol-1)	equiv	Mol	Catalyst	Mass (g)	Reagent	MW (g mmol-1)	Mass (g)	Reaction Solvent	Volume (mL)	Density (g.mL-1)	Mass (g)	Work up Chemical	Mass (g)	Workup Solvent	Volume (mL)	Density (g mL-1)	Mass (g)
Reactant E		Fmoc-D-Dab(Boc)-OH	10.1315	440.5	1	0.023	DCPEAC	0.630384	PPh3	262.29	7.2392	THF	57.5	0.889	51.1175						0
		Benzyl alcohol	2.98466	108.14	1.2	0.0276			PhI(OAc)2	322.1	14.8166				0						0
		Total	13.1162	548.64		0.0506		0.630384			22.0558				51.1175		0				0
										Yield (%)	80
										AE (%)	96.7155						mass (g)	MW	mol
										RME (%)	74.438					Product	9.76341	530.62	0.0184
										MI total (g g-1)	8.90261
										MI RRC (g g-1)	3.66699
										MI Solvents (g g-1)	5.23562
Simulation 3: PPh3 1.2 eq, DCPEAC 0.1 eq, PhI(OAc)2 2.0 eq, Conc 0.4 M, yield of 70%
		METRICS
		Reactant (Limiting Reactant First)	Mass (g)	MW (g mmol-1)	equiv	Mol	Catalyst	Mass (g)	Reagent	MW (g mmol-1)	Mass (g)	Reaction Solvent	Volume (mL)	Density (g.mL-1)	Mass (g)	Work up Chemical	Mass (g)	Workup Solvent	Volume (mL)	Density (g mL-1)	Mass (g)
Reactant A		Benzoic acid	2.80876	122.12	1	0.023	DCPEAC	0.630384	PPh3	262.29	7.2392	THF	57.5	0.889	51.1175						0
		Benzyl alcohol	2.98466	108.14	1.2	0.0276			PhI(OAc)2	322.1	14.8166				0						0
		Total	5.79342	230.26		0.0506		0.630384			22.0558				51.1175		0				0
										Yield (%)	70
										AE (%)	92.1784						mass (g)	MW	mol
										RME (%)	58.9845					Product	3.41722	212.25	0.0161
										MI total (g g-1)	23.2929
										MI RRC (g g-1)	8.33413
										MI Solvents (g g-1)	14.9588		Conc (M)	0.4
		METRICS
		Reactant (Limiting Reactant First)	Mass (g)	MW (g mmol-1)	equiv	Mol	Catalyst	Mass (g)	Reagent	MW (g mmol-1)	Mass (g)	Reaction Solvent	Volume (mL)	Density (g.mL-1)	Mass (g)	Work up Chemical	Mass (g)	Workup Solvent	Volume (mL)	Density (g mL-1)	Mass (g)
Reactant B		4-Chlorobenzoic acid	3.60111	156.57	1	0.023	DCPEAC	0.630384	PPh3	262.29	7.2392	THF	57.5	0.889	51.1175						0
		Benzyl alcohol	2.98466	108.14	1.2	0.0276			PhI(OAc)2	322.1	14.8166				0						0
		Total	6.58577	264.71		0.0506		0.630384			22.0558				51.1175		0				0
										Yield (%)	70
										AE (%)	93.1926						mass (g)	MW	mol
										RME (%)	60.3074					Product	3.97171	246.69	0.0161
										MI total (g g-1)	20.2405
										MI RRC (g g-1)	7.37012
										MI Solvents (g g-1)	12.8704
		METRICS
		Reactant (Limiting Reactant First)	Mass (g)	MW (g mmol-1)	equiv	Mol	Catalyst	Mass (g)	Reagent	MW (g mmol-1)	Mass (g)	Reaction Solvent	Volume (mL)	Density (g.mL-1)	Mass (g)	Work up Chemical	Mass (g)	Workup Solvent	Volume (mL)	Density (g mL-1)	Mass (g)
Reactant C		3,5-Nitrobenzoic acid	4.87991	212.17	1	0.023	DCPEAC	0.630384	PPh3	262.29	7.2392	THF	57.5	0.889	51.1175						0
		Benzyl alcohol	2.98466	108.14	1.2	0.0276			PhI(OAc)2	322.1	14.8166				0						0
		Total	7.86457	320.31		0.0506		0.630384			22.0558				51.1175		0				0
										Yield (%)	70
										AE (%)	94.3586						mass (g)	MW	mol
										RME (%)	61.8732					Product	4.86606	302.24	0.0161
										MI total (g g-1)	16.7832
										MI RRC (g g-1)	6.27833
										MI Solvents (g g-1)	10.5049
		METRICS
		Reactant (Limiting Reactant First)	Mass (g)	MW (g mmol-1)	equiv	Mol	Catalyst	Mass (g)	Reagent	MW (g mmol-1)	Mass (g)	Reaction Solvent	Volume (mL)	Density (g.mL-1)	Mass (g)	Work up Chemical	Mass (g)	Workup Solvent	Volume (mL)	Density (g mL-1)	Mass (g)
Reactant D		(2E)-3-[2-chloro-4-(cyclopentyloxy)-5-methoxyphenyl]acrylic acid	7.14771	310.77	1	0.023	DCPEAC	0.630384	PPh3	262.29	7.2392	THF	57.5	0.889	51.1175						0
		Benzyl alcohol	2.98466	108.14	1.2	0.0276			PhI(OAc)2	322.1	14.8166				0						0
		Total	10.1324	418.91		0.0506		0.630384			22.0558				51.1175		0				0
										Yield (%)	70
										AE (%)	95.7007						mass (g)	MW	mol
										RME (%)	63.7017					Product	6.45449	400.9	0.0161
										MI total (g g-1)	13.0043
										MI RRC (g g-1)	5.08461
										MI Solvents (g g-1)	7.91968
		METRICS
		Reactant (Limiting Reactant First)	Mass (g)	MW (g mmol-1)	equiv	Mol	Catalyst	Mass (g)	Reagent	MW (g mmol-1)	Mass (g)	Reaction Solvent	Volume (mL)	Density (g.mL-1)	Mass (g)	Work up Chemical	Mass (g)	Workup Solvent	Volume (mL)	Density (g mL-1)	Mass (g)
Reactant E		Fmoc-D-Dab(Boc)-OH	10.1315	440.5	1	0.023	DCPEAC	0.630384	PPh3	262.29	7.2392	THF	57.5	0.889	51.1175						0
		Benzyl alcohol	2.98466	108.14	1.2	0.0276			PhI(OAc)2	322.1	14.8166				0						0
		Total	13.1162	548.64		0.0506		0.630384			22.0558				51.1175		0				0
										Yield (%)	70
										AE (%)	96.7155						mass (g)	MW	mol
										RME (%)	65.1332					Product	8.54298	530.62	0.0161
										MI total (g g-1)	10.1744
										MI RRC (g g-1)	4.19085
										MI Solvents (g g-1)	5.98357
Simulation 4: PPh3 1.2 eq, DCPEAC 0.1 eq, PhI(OAc)2 2.0 eq, Conc 0.4 M, yield of 50%
		METRICS
		Reactant (Limiting Reactant First)	Mass (g)	MW (g mmol-1)	equiv	Mol	Catalyst	Mass (g)	Reagent	MW (g mmol-1)	Mass (g)	Reaction Solvent	Volume (mL)	Density (g.mL-1)	Mass (g)	Work up Chemical	Mass (g)	Workup Solvent	Volume (mL)	Density (g mL-1)	Mass (g)
Reactant A		Benzoic acid	2.80876	122.12	1	0.023	DCPEAC	0.630384	PPh3	262.29	7.2392	THF	57.5	0.889	51.1175						0
		Benzyl alcohol	2.98466	108.14	1.2	0.0276			PhI(OAc)2	322.1	14.8166				0						0
		Total	5.79342	230.26		0.0506		0.630384			22.0558				51.1175		0				0
										Yield (%)	50
										AE (%)	92.1784						mass (g)	MW	mol
										RME (%)	42.1318					Product	2.44088	212.25	0.0115
										MI total (g g-1)	32.6101
										MI RRC (g g-1)	11.6678
										MI Solvents (g g-1)	20.9423		Conc (M)	0.4
		METRICS
		Reactant (Limiting Reactant First)	Mass (g)	MW (g mmol-1)	equiv	Mol	Catalyst	Mass (g)	Reagent	MW (g mmol-1)	Mass (g)	Reaction Solvent	Volume (mL)	Density (g.mL-1)	Mass (g)	Work up Chemical	Mass (g)	Workup Solvent	Volume (mL)	Density (g mL-1)	Mass (g)
Reactant B		4-Chlorobenzoic acid	3.60111	156.57	1	0.023	DCPEAC	0.630384	PPh3	262.29	7.2392	THF	57.5	0.889	51.1175						0
		Benzyl alcohol	2.98466	108.14	1.2	0.0276			PhI(OAc)2	322.1	14.8166				0						0
		Total	6.58577	264.71		0.0506		0.630384			22.0558				51.1175		0				0
										Yield (%)	50
										AE (%)	93.1926						mass (g)	MW	mol
										RME (%)	43.0767					Product	2.83693	246.69	0.0115
										MI total (g g-1)	28.3367
										MI RRC (g g-1)	10.3182
										MI Solvents (g g-1)	18.0186
		METRICS
		Reactant (Limiting Reactant First)	Mass (g)	MW (g mmol-1)	equiv	Mol	Catalyst	Mass (g)	Reagent	MW (g mmol-1)	Mass (g)	Reaction Solvent	Volume (mL)	Density (g.mL-1)	Mass (g)	Work up Chemical	Mass (g)	Workup Solvent	Volume (mL)	Density (g mL-1)	Mass (g)
Reactant C		3,5-Nitrobenzoic acid	4.87991	212.17	1	0.023	DCPEAC	0.630384	PPh3	262.29	7.2392	THF	57.5	0.889	51.1175						0
		Benzyl alcohol	2.98466	108.14	1.2	0.0276			PhI(OAc)2	322.1	14.8166				0						0
		Total	7.86457	320.31		0.0506		0.630384			22.0558				51.1175		0				0
										Yield (%)	50
										AE (%)	94.3586						mass (g)	MW	mol
										RME (%)	44.1951					Product	3.47576	302.24	0.0115
										MI total (g g-1)	23.4965
										MI RRC (g g-1)	8.78966
										MI Solvents (g g-1)	14.7069
		METRICS
		Reactant (Limiting Reactant First)	Mass (g)	MW (g mmol-1)	equiv	Mol	Catalyst	Mass (g)	Reagent	MW (g mmol-1)	Mass (g)	Reaction Solvent	Volume (mL)	Density (g.mL-1)	Mass (g)	Work up Chemical	Mass (g)	Workup Solvent	Volume (mL)	Density (g mL-1)	Mass (g)
Reactant D		(2E)-3-[2-chloro-4-(cyclopentyloxy)-5-methoxyphenyl]acrylic acid	7.14771	310.77	1	0.023	DCPEAC	0.630384	PPh3	262.29	7.2392	THF	57.5	0.889	51.1175						0
		Benzyl alcohol	2.98466	108.14	1.2	0.0276			PhI(OAc)2	322.1	14.8166				0						0
		Total	10.1324	418.91		0.0506		0.630384			22.0558				51.1175		0				0
										Yield (%)	50
										AE (%)	95.7007						mass (g)	MW	mol
										RME (%)	45.5012					Product	4.61035	400.9	0.0115
										MI total (g g-1)	18.206
										MI RRC (g g-1)	7.11845
										MI Solvents (g g-1)	11.0876
		METRICS
		Reactant (Limiting Reactant First)	Mass (g)	MW (g mmol-1)	equiv	Mol	Catalyst	Mass (g)	Reagent	MW (g mmol-1)	Mass (g)	Reaction Solvent	Volume (mL)	Density (g.mL-1)	Mass (g)	Work up Chemical	Mass (g)	Workup Solvent	Volume (mL)	Density (g mL-1)	Mass (g)
Reactant E		Fmoc-D-Dab(Boc)-OH	10.1315	440.5	1	0.023	DCPEAC	0.630384	PPh3	262.29	7.2392	THF	57.5	0.889	51.1175						0
		Benzyl alcohol	2.98466	108.14	1.2	0.0276			PhI(OAc)2	322.1	14.8166				0						0
		Total	13.1162	548.64		0.0506		0.630384			22.0558				51.1175		0				0
										Yield (%)	50
										AE (%)	96.7155						mass (g)	MW	mol
										RME (%)	46.5237					Product	6.10213	530.62	0.0115
										MI total (g g-1)	14.2442
										MI RRC (g g-1)	5.86719
										MI Solvents (g g-1)	8.37699
Simulation 5: PPh3 1.2 eq, DCPEAC 0.1 eq, PhI(OAc)2 2.0 eq, Scale x5, Conc 0.4 M, yield of 90%
		METRICS
		Reactant (Limiting Reactant First)	Mass (g)	MW (g mmol-1)	equiv	Mol	Catalyst	Mass (g)	Reagent	MW (g mmol-1)	Mass (g)	Reaction Solvent	Volume (mL)	Density (g.mL-1)	Mass (g)	Work up Chemical	Mass (g)	Workup Solvent	Volume (mL)	Density (g mL-1)	Mass (g)
Reactant A		Benzoic acid	14.05	122.12	1	0.115051	DCPEAC	3.15331	PPh3	262.29	36.212	THF	287.5	0.889	255.588						0
		Benzyl alcohol	14.9233	108.14	1.2	0.138061			PhI(OAc)2	322.1	74.1157				0						0
		Total	28.9733	230.26		0.253112		3.15331			110.328				255.588		0				0
										Yield (%)	90
										AE (%)	92.1784						mass (g)	MW	mol
										RME (%)	75.8545					Product	21.9776	212.25	0.103546
										MI total (g g-1)	18.1113
										MI RRC (g g-1)	6.4818
										MI Solvents (g g-1)	11.6295		Conc (M)	0.400177
		METRICS
		Reactant (Limiting Reactant First)	Mass (g)	MW (g mmol-1)	equiv	Mol	Catalyst	Mass (g)	Reagent	MW (g mmol-1)	Mass (g)	Reaction Solvent	Volume (mL)	Density (g.mL-1)	Mass (g)	Work up Chemical	Mass (g)	Workup Solvent	Volume (mL)	Density (g mL-1)	Mass (g)
Reactant B		4-Chlorobenzoic acid	18.01	156.57	1	0.115028	DCPEAC	3.1527	PPh3	262.29	36.205	THF	287.5	0.889	255.588						0
		Benzyl alcohol	14.927	108.14	1.2	0.138034			PhI(OAc)2	322.1	74.1013				0						0
		Total	32.937	264.71		0.253063		3.1527			110.306				255.588		0				0
										Yield (%)	90
										AE (%)	93.1926						mass (g)	MW	mol
										RME (%)	77.5381					Product	25.5387	246.69	0.103526
										MI total (g g-1)	15.7402
										MI RRC (g g-1)	5.73231
										MI Solvents (g g-1)	10.0078
		METRICS
		Reactant (Limiting Reactant First)	Mass (g)	MW (g mmol-1)	equiv	Mol	Catalyst	Mass (g)	Reagent	MW (g mmol-1)	Mass (g)	Reaction Solvent	Volume (mL)	Density (g.mL-1)	Mass (g)	Work up Chemical	Mass (g)	Workup Solvent	Volume (mL)	Density (g mL-1)	Mass (g)
Reactant C		3,5-Nitrobenzoic acid	24.4	212.17	1	0.115002	DCPEAC	3.15198	PPh3	262.29	36.1967	THF	287.5	0.889	255.588						0
		Benzyl alcohol	14.9236	108.14	1.2	0.138003			PhI(OAc)2	322.1	74.0844				0						0
		Total	39.3236	320.31		0.253005		3.15198			110.281				255.588		0				0
										Yield (%)	90
										AE (%)	94.3586						mass (g)	MW	mol
										RME (%)	79.5513					Product	31.2824	302.24	0.103502
										MI total (g g-1)	13.0535
										MI RRC (g g-1)	4.88315
										MI Solvents (g g-1)	8.17032
		METRICS
		Reactant (Limiting Reactant First)	Mass (g)	MW (g mmol-1)	equiv	Mol	Catalyst	Mass (g)	Reagent	MW (g mmol-1)	Mass (g)	Reaction Solvent	Volume (mL)	Density (g.mL-1)	Mass (g)	Work up Chemical	Mass (g)	Workup Solvent	Volume (mL)	Density (g mL-1)	Mass (g)
Reactant D		(2E)-3-[2-chloro-4-(cyclopentyloxy)-5-methoxyphenyl]acrylic acid	35.75	310.77	1	0.115037	DCPEAC	3.15293	PPh3	262.29	36.2076	THF	287.5	0.889	255.588						0
		Benzyl alcohol	14.9281	108.14	1.2	0.138044			PhI(OAc)2	322.1	74.1067				0						0
		Total	50.6781	418.91		0.253081		3.15293			110.314				255.588		0				0
										Yield (%)	90
										AE (%)	95.7007						mass (g)	MW	mol
										RME (%)	81.9021					Product	41.5064	400.9	0.103533
										MI total (g g-1)	10.1125
										MI RRC (g g-1)	3.9547
										MI Solvents (g g-1)	6.15778
		METRICS
		Reactant (Limiting Reactant First)	Mass (g)	MW (g mmol-1)	equiv	Mol	Catalyst	Mass (g)	Reagent	MW (g mmol-1)	Mass (g)	Reaction Solvent	Volume (mL)	Density (g.mL-1)	Mass (g)	Work up Chemical	Mass (g)	Workup Solvent	Volume (mL)	Density (g mL-1)	Mass (g)
Reactant E		Fmoc-D-Dab(Boc)-OH	50.66	440.5	1	0.115006	DCPEAC	3.15208	PPh3	262.29	36.1978	THF	287.5	0.889	255.588						0
		Benzyl alcohol	14.9241	108.14	1.2	0.138007			PhI(OAc)2	322.1	74.0867				0						0
		Total	65.5841	548.64		0.253012		3.15208			110.284				255.588		0				0
										Yield (%)	90
										AE (%)	96.7155						mass (g)	MW	mol
										RME (%)	83.7427					Product	54.9219	530.62	0.103505
										MI total (g g-1)	7.9132
										MI RRC (g g-1)	3.25955
										MI Solvents (g g-1)	4.65366
Simulation 6: PPh3 1.2 eq, DCPEAC 0.1 eq, PhI(OAc)2 2.0 eq, Conc 0.8 M, yield of 90%
		METRICS
		Reactant (Limiting Reactant First)	Mass (g)	MW (g mmol-1)	equiv	Mol	Catalyst	Mass (g)	Reagent	MW (g mmol-1)	Mass (g)	Reaction Solvent	Volume (mL)	Density (g.mL-1)	Mass (g)	Work up Chemical	Mass (g)	Workup Solvent	Volume (mL)	Density (g mL-1)	Mass (g)
Reactant A		Benzoic acid	2.80876	122.12	1	0.023	DCPEAC	0.630384	PPh3	262.29	7.2392	THF	28.7	0.889	25.5143						0
		Benzyl alcohol	2.98466	108.14	1.2	0.0276			PhI(OAc)2	322.1	14.8166				0						0
		Total	5.79342	230.26		0.0506		0.630384			22.0558				25.5143		0				0
										Yield (%)	90
										AE (%)	92.1784						mass (g)	MW	mol
										RME (%)	75.8373					Product	4.39358	212.25	0.0207
										MI total (g g-1)	12.2893
										MI RRC (g g-1)	6.4821
										MI Solvents (g g-1)	5.80718		Conc (M)	0.801394
		METRICS
		Reactant (Limiting Reactant First)	Mass (g)	MW (g mmol-1)	equiv	Mol	Catalyst	Mass (g)	Reagent	MW (g mmol-1)	Mass (g)	Reaction Solvent	Volume (mL)	Density (g.mL-1)	Mass (g)	Work up Chemical	Mass (g)	Workup Solvent	Volume (mL)	Density (g mL-1)	Mass (g)
Reactant B		4-Chlorobenzoic acid	3.60111	156.57	1	0.023	DCPEAC	0.630384	PPh3	262.29	7.2392	THF	28.7	0.889	25.5143						0
		Benzyl alcohol	2.98466	108.14	1.2	0.0276			PhI(OAc)2	322.1	14.8166				0						0
		Total	6.58577	264.71		0.0506		0.630384			22.0558				25.5143		0				0
										Yield (%)	90
										AE (%)	93.1926						mass (g)	MW	mol
										RME (%)	77.5381					Product	5.10648	246.69	0.0207
										MI total (g g-1)	10.7288
										MI RRC (g g-1)	5.73231
										MI Solvents (g g-1)	4.99645
		METRICS
		Reactant (Limiting Reactant First)	Mass (g)	MW (g mmol-1)	equiv	Mol	Catalyst	Mass (g)	Reagent	MW (g mmol-1)	Mass (g)	Reaction Solvent	Volume (mL)	Density (g.mL-1)	Mass (g)	Work up Chemical	Mass (g)	Workup Solvent	Volume (mL)	Density (g mL-1)	Mass (g)
Reactant C		3,5-Nitrobenzoic acid	4.87991	212.17	1	0.023	DCPEAC	0.630384	PPh3	262.29	7.2392	THF	28.7	0.889	25.5143						0
		Benzyl alcohol	2.98466	108.14	1.2	0.0276			PhI(OAc)2	322.1	14.8166				0						0
		Total	7.86457	320.31		0.0506		0.630384			22.0558				25.5143		0				0
										Yield (%)	90
										AE (%)	94.3586						mass (g)	MW	mol
										RME (%)	79.5513					Product	6.25637	302.24	0.0207
										MI total (g g-1)	8.96128
										MI RRC (g g-1)	4.88315
										MI Solvents (g g-1)	4.07813
		METRICS
		Reactant (Limiting Reactant First)	Mass (g)	MW (g mmol-1)	equiv	Mol	Catalyst	Mass (g)	Reagent	MW (g mmol-1)	Mass (g)	Reaction Solvent	Volume (mL)	Density (g.mL-1)	Mass (g)	Work up Chemical	Mass (g)	Workup Solvent	Volume (mL)	Density (g mL-1)	Mass (g)
Reactant D		(2E)-3-[2-chloro-4-(cyclopentyloxy)-5-methoxyphenyl]acrylic acid	7.14771	310.77	1	0.023	DCPEAC	0.630384	PPh3	262.29	7.2392	THF	28.7	0.889	25.5143						0
		Benzyl alcohol	2.98466	108.14	1.2	0.0276			PhI(OAc)2	322.1	14.8166				0						0
		Total	10.1324	418.91		0.0506		0.630384			22.0558				25.5143		0				0
										Yield (%)	90
										AE (%)	95.7007						mass (g)	MW	mol
										RME (%)	81.9021					Product	8.29863	400.9	0.0207
										MI total (g g-1)	7.02922
										MI RRC (g g-1)	3.9547
										MI Solvents (g g-1)	3.07452
		METRICS
		Reactant (Limiting Reactant First)	Mass (g)	MW (g mmol-1)	equiv	Mol	Catalyst	Mass (g)	Reagent	MW (g mmol-1)	Mass (g)	Reaction Solvent	Volume (mL)	Density (g.mL-1)	Mass (g)	Work up Chemical	Mass (g)	Workup Solvent	Volume (mL)	Density (g mL-1)	Mass (g)
Reactant E		Fmoc-D-Dab(Boc)-OH	10.1315	440.5	1	0.023	DCPEAC	0.630384	PPh3	262.29	7.2392	THF	28.7	0.889	25.5143						0
		Benzyl alcohol	2.98466	108.14	1.2	0.0276			PhI(OAc)2	322.1	14.8166				0						0
		Total	13.1162	548.64		0.0506		0.630384			22.0558				25.5143		0				0
										Yield (%)	90
										AE (%)	96.7155						mass (g)	MW	mol
										RME (%)	83.7427					Product	10.9838	530.62	0.0207
										MI total (g g-1)	5.58245
										MI RRC (g g-1)	3.25955
										MI Solvents (g g-1)	2.3229
			Entry	Substrate	AE	RME	PMI	PMIRRC	PMIsolv
					(%)	(%)	(g g-1)	(g g-1)	(g g-1)
			Literature results		93.771	79.7848	36.4445	6.10026	30.3442
			Literature modified to simulation paramaters		93.771	77.821	14.4283	5.32508	9.10327
			Simulation 1: PPh3 1.2 eq, DCPEAC 0.1 eq, PhI(OAc)2 2.0 eq, Conc 0.4 M, yield of 90%
			1	A	92.1784	75.8373	18.1167	6.4821	11.6346
			2	B	93.1926	77.5381	15.7426	5.73231	10.0103
			3	C	94.3586	79.5513	13.0536	4.88315	8.17048
			4	D	95.7007	81.9021	10.1144	3.9547	6.15975
			5	E	96.7155	83.7427	7.91343	3.25955	4.65388
			Simulation 2: PPh3 1.2 eq, DCPEAC 0.1 eq, PhI(OAc)2 2.0 eq, Conc 0.4 M, yield of 80%
			1	A	92.1784	67.4109	20.3813	7.29237	13.0889
			2	B	93.1926	68.9227	17.7105	6.44885	11.2616
			3	C	94.3586	70.7122	14.6853	5.49354	9.19178
			4	D	95.7007	72.8019	11.3788	4.44903	6.92972
			5	E	96.7155	74.438	8.90261	3.66699	5.23562
			Simulation 3: PPh3 1.2 eq, DCPEAC 0.1 eq, PhI(OAc)2 2.0 eq, Conc 0.4 M, yield of 70%
			1	A	92.1784	58.9845	23.2929	8.33413	14.9588
			2	B	93.1926	60.3074	20.2405	7.37012	12.8704
			3	C	94.3586	61.8732	16.7832	6.27833	10.5049
			4	D	95.7007	63.7017	13.0043	5.08461	7.91968
			5	E	96.7155	65.1332	10.1744	4.19085	5.98357
			Simulation 4: PPh3 1.2 eq, DCPEAC 0.1 eq, PhI(OAc)2 2.0 eq, Conc 0.4 M, yield of 50%
			1	A	92.1784	42.1318	32.6101	11.6678	20.9423
			2	B	93.1926	43.0767	28.3367	10.3182	18.0186
			3	C	94.3586	44.1951	23.4965	8.78966	14.7069
			4	D	95.7007	45.5012	18.206	7.11845	11.0876
			5	E	96.7155	46.5237	14.2442	5.86719	8.37699
			Simulation 5: PPh3 1.2 eq, DCPEAC 0.1 eq, PhI(OAc)2 2.0 eq, Scale x5, Conc 0.4 M, yield of 90%
			1	A	92.1784	75.8545	18.1113	6.4818	11.6295
			2	B	93.1926	77.5381	15.7402	5.73231	10.0078
			3	C	94.3586	79.5513	13.0535	4.88315	8.17032
			4	D	95.7007	81.9021	10.1125	3.9547	6.15778
			5	E	96.7155	83.7427	7.9132	3.25955	4.65366
			Simulation 6: PPh3 1.2 eq, DCPEAC 0.1 eq, PhI(OAc)2 2.0 eq, Conc 0.8 M, yield of 90%
			1	A	92.1784	75.8373	12.2893	6.4821	5.80718
			2	B	93.1926	77.5381	10.7288	5.73231	4.99645
			3	C	94.3586	79.5513	8.96128	4.88315	4.07813
			4	D	95.7007	81.9021	7.02922	3.9547	3.07452
			5	E	96.7155	83.7427	5.58245	3.25955	2.3229

## Sheet: DCPEAC 0.1eq, Fe(Pc) 0.1eq
Literature conditions:
		Angew Chem Ind Ed. 2013, 52, 4613-4617
								A mixture of (S)-ethyl lactate (100 mg, 0.850 mmol), 3,5-dinitrobenzoic acid (6; 198 mg, 0.935 mmol), triphenylphosphine (446 mg, 1.70 mmol), hydrazine 8l (21.2 mg, 0.0850 mmol), iron phthalocyanine (48.3 mg, 0.0850 mmol) and activated 5 MS (400 mg) in THF (1.7 mL) was heated at 65°C under air (balloon). After the reaction mixture was cooled to room temperature and filtered, the solvent was remov…
		METRICS
		Reactant (Limiting Reactant First)	Mass (g)	MW (g mmol-1)	equiv	Mol	Catalyst	Mass (g)	Reagent	MW (g mmol-1)	Mass (g)	Reaction Solvent	Volume (mL)	Density (g.mL-1)	Mass (g)	Work up Chemical	Mass (g)	Workup Solvent	Volume (mL)	Density (g mL-1)	Mass (g)
		(-)-S-Ethyl lactate	0.10041	118.13	1	0.00085	DCPEAC	0.0211727	PPh3	262.29	0.445893	THF	1.7	0.889	1.5113						0
		3,5-Dinitrobenzoic acid	0.198332	212.12	1.1	0.000935	Fe(Pc)	0.0483115							0						0
		Total	0.298743	330.25		0.001785		0.0694841			0.445893				1.5113		0				0
										Yield (%)	79
										AE (%)	94.5435						mass (g)	MW	mol
										RME (%)	70.1816					Product	0.209662	312.23	0.0006715
										MI total (g g-1)	11.0913
										MI RRC (g g-1)	3.883
										MI Solvents (g g-1)	7.20825		Conc (M)	0.5
Literature conditions altered to equal our simulation conditions - Excess reactant 1.2 eq from 1.1 eq, Conc 0.4 M from 0.5 M, Yield 90% from 79%
		METRICS
		Reactant (Limiting Reactant First)	Mass (g)	MW (g mmol-1)	equiv	Mol	Catalyst	Mass (g)	Reagent	MW (g mmol-1)	Mass (g)	Reaction Solvent	Volume (mL)	Density (g.mL-1)	Mass (g)	Work up Chemical	Mass (g)	Workup Solvent	Volume (mL)	Density (g mL-1)	Mass (g)
		3,5-dinitrobenzoic acid	0.180302	212.12	1	0.00085	DCPEAC	0.0211727	PPh3	262.29	0.267536	THF	2.1	0.889	1.8669						0
		(-)-S-Ethyl lactate	0.120493	118.13	1.2	0.00102	Fe(Pc)	0.0483115							0						0
		Total	0.300795	330.25		0.00187		0.0694841			0.267536				1.8669		0				0
										Yield (%)	90
										AE (%)	94.5435						mass (g)	MW	mol
										RME (%)	79.4083					Product	0.238856	312.23	0.000765
										MI total (g g-1)	10.4863
										MI RRC (g g-1)	2.67029
										MI Solvents (g g-1)	7.81601		Conc (M)	0.404762
Simulation 1: PPh3 1.2 eq, DCPEAC 0.1 eq, Fe(Pc) 0.1 eq, Conc 0.4 M, yield of 90%
		METRICS
		Reactant (Limiting Reactant First)	Mass (g)	MW (g mmol-1)	equiv	Mol	Catalyst	Mass (g)	Reagent	MW (g mmol-1)	Mass (g)	Reaction Solvent	Volume (mL)	Density (g.mL-1)	Mass (g)	Work up Chemical	Mass (g)	Workup Solvent	Volume (mL)	Density (g mL-1)	Mass (g)
Reactant A		Benzoic acid	2.80876	122.12	1	0.023	DCPEAC	0.572907	PPh3	262.29	7.2392	THF	57.5	0.889	51.1175						0
		Benzyl alcohol	2.98466	108.14	1.2	0.0276	Fe(Pc)	1.30725							0						0
		Total	5.79342	230.26		0.0506		1.88016			7.2392				51.1175		0				0
										Yield (%)	90
										AE (%)	92.1784						mass (g)	MW	mol
										RME (%)	75.8373					Product	4.39358	212.25	0.0207
										MI total (g g-1)	15.0288
										MI RRC (g g-1)	3.39423
										MI Solvents (g g-1)	11.6346		Conc (M)	0.4
		METRICS
		Reactant (Limiting Reactant First)	Mass (g)	MW (g mmol-1)	equiv	Mol	Catalyst	Mass (g)	Reagent	MW (g mmol-1)	Mass (g)	Reaction Solvent	Volume (mL)	Density (g.mL-1)	Mass (g)	Work up Chemical	Mass (g)	Workup Solvent	Volume (mL)	Density (g mL-1)	Mass (g)
Reactant B		4-Chlorobenzoic acid	3.60111	156.57	1	0.023	DCPEAC	0.572907	PPh3	262.29	7.2392	THF	57.5	0.889	51.1175						0
		Benzyl alcohol	2.98466	108.14	1.2	0.0276	Fe(Pc)	1.30725							0						0
		Total	6.58577	264.71		0.0506		1.88016			7.2392				51.1175		0				0
										Yield (%)	90
										AE (%)	93.1926						mass (g)	MW	mol
										RME (%)	77.5381					Product	5.10648	246.69	0.0207
										MI total (g g-1)	13.0858
										MI RRC (g g-1)	3.07553
										MI Solvents (g g-1)	10.0103		Conc (M)	0.4
		METRICS
		Reactant (Limiting Reactant First)	Mass (g)	MW (g mmol-1)	equiv	Mol	Catalyst	Mass (g)	Reagent	MW (g mmol-1)	Mass (g)	Reaction Solvent	Volume (mL)	Density (g.mL-1)	Mass (g)	Work up Chemical	Mass (g)	Workup Solvent	Volume (mL)	Density (g mL-1)	Mass (g)
Reactant C		3,5-Nitrobenzoic acid	4.87991	212.17	1	0.023	DCPEAC	0.572907	PPh3	262.29	7.2392	THF	57.5	0.889	51.1175						0
		Benzyl alcohol	2.98466	108.14	1.2	0.0276	Fe(Pc)	1.30725							0						0
		Total	7.86457	320.31		0.0506		1.88016			7.2392				51.1175		0				0
										Yield (%)	90
										AE (%)	94.3586						mass (g)	MW	mol
										RME (%)	79.5513					Product	6.25637	302.24	0.0207
										MI total (g g-1)	10.8851
										MI RRC (g g-1)	2.71466
										MI Solvents (g g-1)	8.17048		Conc (M)	0.4
		METRICS
		Reactant (Limiting Reactant First)	Mass (g)	MW (g mmol-1)	equiv	Mol	Catalyst	Mass (g)	Reagent	MW (g mmol-1)	Mass (g)	Reaction Solvent	Volume (mL)	Density (g.mL-1)	Mass (g)	Work up Chemical	Mass (g)	Workup Solvent	Volume (mL)	Density (g mL-1)	Mass (g)
Reactant D		(2E)-3-[2-chloro-4-(cyclopentyloxy)-5-methoxyphenyl]acrylic acid	7.14771	310.77	1	0.023	DCPEAC	0.572907	PPh3	262.29	7.2392	THF	57.5	0.889	51.1175						0
		Benzyl alcohol	2.98466	108.14	1.2	0.0276	Fe(Pc)	1.30725							0						0
		Total	10.1324	418.91		0.0506		1.88016			7.2392				51.1175		0				0
										Yield (%)	90
										AE (%)	95.7007						mass (g)	MW	mol
										RME (%)	81.9021					Product	8.29863	400.9	0.0207
										MI total (g g-1)	8.47962
										MI RRC (g g-1)	2.31987
										MI Solvents (g g-1)	6.15975		Conc (M)	0.4
		METRICS
		Reactant (Limiting Reactant First)	Mass (g)	MW (g mmol-1)	equiv	Mol	Catalyst	Mass (g)	Reagent	MW (g mmol-1)	Mass (g)	Reaction Solvent	Volume (mL)	Density (g.mL-1)	Mass (g)	Work up Chemical	Mass (g)	Workup Solvent	Volume (mL)	Density (g mL-1)	Mass (g)
Reactant E		Fmoc-D-Dab(Boc)-OH	10.1315	440.5	1	0.023	DCPEAC	0.572907	PPh3	262.29	7.2392	THF	57.5	0.889	51.1175						0
		Benzyl alcohol	2.98466	108.14	1.2	0.0276	Fe(Pc)	1.30725							0						0
		Total	13.1162	548.64		0.0506		1.88016			7.2392				51.1175		0				0
										Yield (%)	90
										AE (%)	96.7155						mass (g)	MW	mol
										RME (%)	83.7427					Product	10.9838	530.62	0.0207
										MI total (g g-1)	6.67827
										MI RRC (g g-1)	2.02439
										MI Solvents (g g-1)	4.65388		Conc (M)	0.4
Simulation 2: PPh3 1.2 eq, DCPEAC 0.1 eq, Fe(Pc) 0.1 eq, Conc 0.4 M, yield of 80%
		METRICS
		Reactant (Limiting Reactant First)	Mass (g)	MW (g mmol-1)	equiv	Mol	Catalyst	Mass (g)	Reagent	MW (g mmol-1)	Mass (g)	Reaction Solvent	Volume (mL)	Density (g.mL-1)	Mass (g)	Work up Chemical	Mass (g)	Workup Solvent	Volume (mL)	Density (g mL-1)	Mass (g)
Reactant A		Benzoic acid	2.80876	122.12	1	0.023	DCPEAC	0.572907	PPh3	262.29	7.2392	THF	57.5	0.889	51.1175						0
		Benzyl alcohol	2.98466	108.14	1.2	0.0276	Fe(Pc)	1.30725							0						0
		Total	5.79342	230.26		0.0506		1.88016			7.2392				51.1175		0				0
										Yield (%)	80
										AE (%)	92.1784						mass (g)	MW	mol
										RME (%)	67.4109					Product	3.9054	212.25	0.0184
										MI total (g g-1)	16.9074
										MI RRC (g g-1)	3.8185
										MI Solvents (g g-1)	13.0889		Conc (M)	0.4
		METRICS
		Reactant (Limiting Reactant First)	Mass (g)	MW (g mmol-1)	equiv	Mol	Catalyst	Mass (g)	Reagent	MW (g mmol-1)	Mass (g)	Reaction Solvent	Volume (mL)	Density (g.mL-1)	Mass (g)	Work up Chemical	Mass (g)	Workup Solvent	Volume (mL)	Density (g mL-1)	Mass (g)
Reactant B		4-Chlorobenzoic acid	3.60111	156.57	1	0.023	DCPEAC	0.572907	PPh3	262.29	7.2392	THF	57.5	0.889	51.1175						0
		Benzyl alcohol	2.98466	108.14	1.2	0.0276	Fe(Pc)	1.30725							0						0
		Total	6.58577	264.71		0.0506		1.88016			7.2392				51.1175		0				0
										Yield (%)	80
										AE (%)	93.1926						mass (g)	MW	mol
										RME (%)	68.9227					Product	4.5391	246.69	0.0184
										MI total (g g-1)	14.7216
										MI RRC (g g-1)	3.45997
										MI Solvents (g g-1)	11.2616
		METRICS
		Reactant (Limiting Reactant First)	Mass (g)	MW (g mmol-1)	equiv	Mol	Catalyst	Mass (g)	Reagent	MW (g mmol-1)	Mass (g)	Reaction Solvent	Volume (mL)	Density (g.mL-1)	Mass (g)	Work up Chemical	Mass (g)	Workup Solvent	Volume (mL)	Density (g mL-1)	Mass (g)
Reactant C		3,5-Nitrobenzoic acid	4.87991	212.17	1	0.023	DCPEAC	0.572907	PPh3	262.29	7.2392	THF	57.5	0.889	51.1175						0
		Benzyl alcohol	2.98466	108.14	1.2	0.0276	Fe(Pc)	1.30725							0						0
		Total	7.86457	320.31		0.0506		1.88016			7.2392				51.1175		0				0
										Yield (%)	80
										AE (%)	94.3586						mass (g)	MW	mol
										RME (%)	70.7122					Product	5.56122	302.24	0.0184
										MI total (g g-1)	12.2458
										MI RRC (g g-1)	3.054
										MI Solvents (g g-1)	9.19178
		METRICS
		Reactant (Limiting Reactant First)	Mass (g)	MW (g mmol-1)	equiv	Mol	Catalyst	Mass (g)	Reagent	MW (g mmol-1)	Mass (g)	Reaction Solvent	Volume (mL)	Density (g.mL-1)	Mass (g)	Work up Chemical	Mass (g)	Workup Solvent	Volume (mL)	Density (g mL-1)	Mass (g)
Reactant D		(2E)-3-[2-chloro-4-(cyclopentyloxy)-5-methoxyphenyl]acrylic acid	7.14771	310.77	1	0.023	DCPEAC	0.572907	PPh3	262.29	7.2392	THF	57.5	0.889	51.1175						0
		Benzyl alcohol	2.98466	108.14	1.2	0.0276	Fe(Pc)	1.30725							0						0
		Total	10.1324	418.91		0.0506		1.88016			7.2392				51.1175		0				0
										Yield (%)	80
										AE (%)	95.7007						mass (g)	MW	mol
										RME (%)	72.8019					Product	7.37656	400.9	0.0184
										MI total (g g-1)	9.53957
										MI RRC (g g-1)	2.60985
										MI Solvents (g g-1)	6.92972
		METRICS
		Reactant (Limiting Reactant First)	Mass (g)	MW (g mmol-1)	equiv	Mol	Catalyst	Mass (g)	Reagent	MW (g mmol-1)	Mass (g)	Reaction Solvent	Volume (mL)	Density (g.mL-1)	Mass (g)	Work up Chemical	Mass (g)	Workup Solvent	Volume (mL)	Density (g mL-1)	Mass (g)
Reactant E		Fmoc-D-Dab(Boc)-OH	10.1315	440.5	1	0.023	DCPEAC	0.572907	PPh3	262.29	7.2392	THF	57.5	0.889	51.1175						0
		Benzyl alcohol	2.98466	108.14	1.2	0.0276	Fe(Pc)	1.30725							0						0
		Total	13.1162	548.64		0.0506		1.88016			7.2392				51.1175		0				0
										Yield (%)	80
										AE (%)	96.7155						mass (g)	MW	mol
										RME (%)	74.438					Product	9.76341	530.62	0.0184
										MI total (g g-1)	7.51306
										MI RRC (g g-1)	2.27743
										MI Solvents (g g-1)	5.23562
Simulation 3: PPh3 1.2 eq, DCPEAC 0.1 eq, Fe(Pc) 0.1 eq, Conc 0.4 M, yield of 70%
		METRICS
		Reactant (Limiting Reactant First)	Mass (g)	MW (g mmol-1)	equiv	Mol	Catalyst	Mass (g)	Reagent	MW (g mmol-1)	Mass (g)	Reaction Solvent	Volume (mL)	Density (g.mL-1)	Mass (g)	Work up Chemical	Mass (g)	Workup Solvent	Volume (mL)	Density (g mL-1)	Mass (g)
Reactant A		Benzoic acid	2.80876	122.12	1	0.023	DCPEAC	0.572907	PPh3	262.29	7.2392	THF	57.5	0.889	51.1175						0
		Benzyl alcohol	2.98466	108.14	1.2	0.0276	Fe(Pc)	1.30725							0						0
		Total	5.79342	230.26		0.0506		1.88016			7.2392				51.1175		0				0
										Yield (%)	70
										AE (%)	92.1784						mass (g)	MW	mol
										RME (%)	58.9845					Product	3.41722	212.25	0.0161
										MI total (g g-1)	19.3228
										MI RRC (g g-1)	4.364
										MI Solvents (g g-1)	14.9588		Conc (M)	0.4
		METRICS
		Reactant (Limiting Reactant First)	Mass (g)	MW (g mmol-1)	equiv	Mol	Catalyst	Mass (g)	Reagent	MW (g mmol-1)	Mass (g)	Reaction Solvent	Volume (mL)	Density (g.mL-1)	Mass (g)	Work up Chemical	Mass (g)	Workup Solvent	Volume (mL)	Density (g mL-1)	Mass (g)
Reactant B		4-Chlorobenzoic acid	3.60111	156.57	1	0.023	DCPEAC	0.572907	PPh3	262.29	7.2392	THF	57.5	0.889	51.1175						0
		Benzyl alcohol	2.98466	108.14	1.2	0.0276	Fe(Pc)	1.30725							0						0
		Total	6.58577	264.71		0.0506		1.88016			7.2392				51.1175		0				0
										Yield (%)	70
										AE (%)	93.1926						mass (g)	MW	mol
										RME (%)	60.3074					Product	3.97171	246.69	0.0161
										MI total (g g-1)	16.8247
										MI RRC (g g-1)	3.95425
										MI Solvents (g g-1)	12.8704
		METRICS
		Reactant (Limiting Reactant First)	Mass (g)	MW (g mmol-1)	equiv	Mol	Catalyst	Mass (g)	Reagent	MW (g mmol-1)	Mass (g)	Reaction Solvent	Volume (mL)	Density (g.mL-1)	Mass (g)	Work up Chemical	Mass (g)	Workup Solvent	Volume (mL)	Density (g mL-1)	Mass (g)
Reactant C		3,5-Nitrobenzoic acid	4.87991	212.17	1	0.023	DCPEAC	0.572907	PPh3	262.29	7.2392	THF	57.5	0.889	51.1175						0
		Benzyl alcohol	2.98466	108.14	1.2	0.0276	Fe(Pc)	1.30725							0						0
		Total	7.86457	320.31		0.0506		1.88016			7.2392				51.1175		0				0
										Yield (%)	70
										AE (%)	94.3586						mass (g)	MW	mol
										RME (%)	61.8732					Product	4.86606	302.24	0.0161
										MI total (g g-1)	13.9952
										MI RRC (g g-1)	3.49028
										MI Solvents (g g-1)	10.5049
		METRICS
		Reactant (Limiting Reactant First)	Mass (g)	MW (g mmol-1)	equiv	Mol	Catalyst	Mass (g)	Reagent	MW (g mmol-1)	Mass (g)	Reaction Solvent	Volume (mL)	Density (g.mL-1)	Mass (g)	Work up Chemical	Mass (g)	Workup Solvent	Volume (mL)	Density (g mL-1)	Mass (g)
Reactant D		(2E)-3-[2-chloro-4-(cyclopentyloxy)-5-methoxyphenyl]acrylic acid	7.14771	310.77	1	0.023	DCPEAC	0.572907	PPh3	262.29	7.2392	THF	57.5	0.889	51.1175						0
		Benzyl alcohol	2.98466	108.14	1.2	0.0276	Fe(Pc)	1.30725							0						0
		Total	10.1324	418.91		0.0506		1.88016			7.2392				51.1175		0				0
										Yield (%)	70
										AE (%)	95.7007						mass (g)	MW	mol
										RME (%)	63.7017					Product	6.45449	400.9	0.0161
										MI total (g g-1)	10.9024
										MI RRC (g g-1)	2.98269
										MI Solvents (g g-1)	7.91968
		METRICS
		Reactant (Limiting Reactant First)	Mass (g)	MW (g mmol-1)	equiv	Mol	Catalyst	Mass (g)	Reagent	MW (g mmol-1)	Mass (g)	Reaction Solvent	Volume (mL)	Density (g.mL-1)	Mass (g)	Work up Chemical	Mass (g)	Workup Solvent	Volume (mL)	Density (g mL-1)	Mass (g)
Reactant E		Fmoc-D-Dab(Boc)-OH	10.1315	440.5	1	0.023	DCPEAC	0.572907	PPh3	262.29	7.2392	THF	57.5	0.889	51.1175						0
		Benzyl alcohol	2.98466	108.14	1.2	0.0276	Fe(Pc)	1.30725							0						0
		Total	13.1162	548.64		0.0506		1.88016			7.2392				51.1175		0				0
										Yield (%)	70
										AE (%)	96.7155						mass (g)	MW	mol
										RME (%)	65.1332					Product	8.54298	530.62	0.0161
										MI total (g g-1)	8.58635
										MI RRC (g g-1)	2.60278
										MI Solvents (g g-1)	5.98357
Simulation 4: PPh3 1.2 eq, DCPEAC 0.1 eq, Fe(Pc) 0.1 eq, Conc 0.4 M, yield of 50%
		METRICS
		Reactant (Limiting Reactant First)	Mass (g)	MW (g mmol-1)	equiv	Mol	Catalyst	Mass (g)	Reagent	MW (g mmol-1)	Mass (g)	Reaction Solvent	Volume (mL)	Density (g.mL-1)	Mass (g)	Work up Chemical	Mass (g)	Workup Solvent	Volume (mL)	Density (g mL-1)	Mass (g)
Reactant A		Benzoic acid	2.80876	122.12	1	0.023	DCPEAC	0.572907	PPh3	262.29	7.2392	THF	57.5	0.889	51.1175						0
		Benzyl alcohol	2.98466	108.14	1.2	0.0276	Fe(Pc)	1.30725							0						0
		Total	5.79342	230.26		0.0506		1.88016			7.2392				51.1175		0				0
										Yield (%)	50
										AE (%)	92.1784						mass (g)	MW	mol
										RME (%)	42.1318					Product	2.44088	212.25	0.0115
										MI total (g g-1)	27.0519
										MI RRC (g g-1)	6.10961
										MI Solvents (g g-1)	20.9423		Conc (M)	0.4
		METRICS
		Reactant (Limiting Reactant First)	Mass (g)	MW (g mmol-1)	equiv	Mol	Catalyst	Mass (g)	Reagent	MW (g mmol-1)	Mass (g)	Reaction Solvent	Volume (mL)	Density (g.mL-1)	Mass (g)	Work up Chemical	Mass (g)	Workup Solvent	Volume (mL)	Density (g mL-1)	Mass (g)
Reactant B		4-Chlorobenzoic acid	3.60111	156.57	1	0.023	DCPEAC	0.572907	PPh3	262.29	7.2392	THF	57.5	0.889	51.1175						0
		Benzyl alcohol	2.98466	108.14	1.2	0.0276	Fe(Pc)	1.30725							0						0
		Total	6.58577	264.71		0.0506		1.88016			7.2392				51.1175		0				0
										Yield (%)	50
										AE (%)	93.1926						mass (g)	MW	mol
										RME (%)	43.0767					Product	2.83693	246.69	0.0115
										MI total (g g-1)	23.5545
										MI RRC (g g-1)	5.53595
										MI Solvents (g g-1)	18.0186
		METRICS
		Reactant (Limiting Reactant First)	Mass (g)	MW (g mmol-1)	equiv	Mol	Catalyst	Mass (g)	Reagent	MW (g mmol-1)	Mass (g)	Reaction Solvent	Volume (mL)	Density (g.mL-1)	Mass (g)	Work up Chemical	Mass (g)	Workup Solvent	Volume (mL)	Density (g mL-1)	Mass (g)
Reactant C		3,5-Nitrobenzoic acid	4.87991	212.17	1	0.023	DCPEAC	0.572907	PPh3	262.29	12.0653	THF	57.5	0.889	51.1175						0
		Benzyl alcohol	2.98466	108.14	1.2	0.0276	Fe(Pc)	1.30725							0						0
		Total	7.86457	320.31		0.0506		1.88016			12.0653				51.1175		0				0
										Yield (%)	50
										AE (%)	94.3586						mass (g)	MW	mol
										RME (%)	44.1951					Product	3.47576	302.24	0.0115
										MI total (g g-1)	20.9818
										MI RRC (g g-1)	6.27491
										MI Solvents (g g-1)	14.7069
		METRICS
		Reactant (Limiting Reactant First)	Mass (g)	MW (g mmol-1)	equiv	Mol	Catalyst	Mass (g)	Reagent	MW (g mmol-1)	Mass (g)	Reaction Solvent	Volume (mL)	Density (g.mL-1)	Mass (g)	Work up Chemical	Mass (g)	Workup Solvent	Volume (mL)	Density (g mL-1)	Mass (g)
Reactant D		(2E)-3-[2-chloro-4-(cyclopentyloxy)-5-methoxyphenyl]acrylic acid	7.14771	310.77	1	0.023	DCPEAC	0.572907	PPh3	262.29	7.2392	THF	57.5	0.889	51.1175						0
		Benzyl alcohol	2.98466	108.14	1.2	0.0276	Fe(Pc)	1.30725							0						0
		Total	10.1324	418.91		0.0506		1.88016			7.2392				51.1175		0				0
										Yield (%)	50
										AE (%)	95.7007						mass (g)	MW	mol
										RME (%)	45.5012					Product	4.61035	400.9	0.0115
										MI total (g g-1)	15.2633
										MI RRC (g g-1)	4.17576
										MI Solvents (g g-1)	11.0876
		METRICS
		Reactant (Limiting Reactant First)	Mass (g)	MW (g mmol-1)	equiv	Mol	Catalyst	Mass (g)	Reagent	MW (g mmol-1)	Mass (g)	Reaction Solvent	Volume (mL)	Density (g.mL-1)	Mass (g)	Work up Chemical	Mass (g)	Workup Solvent	Volume (mL)	Density (g mL-1)	Mass (g)
Reactant E		Fmoc-D-Dab(Boc)-OH	10.1315	440.5	1	0.023	DCPEAC	0.572907	PPh3	262.29	7.2392	THF	57.5	0.889	51.1175						0
		Benzyl alcohol	2.98466	108.14	1.2	0.0276	Fe(Pc)	1.30725							0						0
		Total	13.1162	548.64		0.0506		1.88016			7.2392				51.1175		0				0
										Yield (%)	50
										AE (%)	96.7155						mass (g)	MW	mol
										RME (%)	46.5237					Product	6.10213	530.62	0.0115
										MI total (g g-1)	12.0209
										MI RRC (g g-1)	3.6439
										MI Solvents (g g-1)	8.37699
Simulation 5: PPh3 1.2 eq, DCPEAC 0.1 eq, Fe(Pc) 0.1 eq, Scale x5, Conc 0.4 M, yield of 90%
		METRICS
		Reactant (Limiting Reactant First)	Mass (g)	MW (g mmol-1)	equiv	Mol	Catalyst	Mass (g)	Reagent	MW (g mmol-1)	Mass (g)	Reaction Solvent	Volume (mL)	Density (g.mL-1)	Mass (g)	Work up Chemical	Mass (g)	Workup Solvent	Volume (mL)	Density (g mL-1)	Mass (g)
Reactant A		Benzoic acid	14.05	122.12	1	0.115051	DCPEAC	2.8658	PPh3	262.29	36.212	THF	287.4	0.889	255.499						0
		Benzyl alcohol	14.9299	108.14	1.2	0.138061	Fe(Pc)	6.53914							0						0
		Total	28.9799	230.26		0.253112		9.40494			36.212				255.499		0				0
										Yield (%)	90
										AE (%)	92.1784						mass (g)	MW	mol
										RME (%)	75.8373					Product	21.9776	212.25	0.103546
										MI total (g g-1)	15.0196
										MI RRC (g g-1)	3.39423
										MI Solvents (g g-1)	11.6254		Conc (M)	0.400316
		METRICS
		Reactant (Limiting Reactant First)	Mass (g)	MW (g mmol-1)	equiv	Mol	Catalyst	Mass (g)	Reagent	MW (g mmol-1)	Mass (g)	Reaction Solvent	Volume (mL)	Density (g.mL-1)	Mass (g)	Work up Chemical	Mass (g)	Workup Solvent	Volume (mL)	Density (g mL-1)	Mass (g)
Reactant B		4-Chlorobenzoic acid	18	156.57	1	0.114965	DCPEAC	2.86365	PPh3	262.29	36.1849	THF	287.4	0.889	255.499						0
		Benzyl alcohol	14.9187	108.14	1.2	0.137957	Fe(Pc)	6.53424							0						0
		Total	32.9187	264.71		0.252922		9.39789			36.1849				255.499		0				0
										Yield (%)	90
										AE (%)	93.1926						mass (g)	MW	mol
										RME (%)	77.5381					Product	25.5245	246.69	0.103468
										MI total (g g-1)	13.0854
										MI RRC (g g-1)	3.07553
										MI Solvents (g g-1)	10.0099
		METRICS
		Reactant (Limiting Reactant First)	Mass (g)	MW (g mmol-1)	equiv	Mol	Catalyst	Mass (g)	Reagent	MW (g mmol-1)	Mass (g)	Reaction Solvent	Volume (mL)	Density (g.mL-1)	Mass (g)	Work up Chemical	Mass (g)	Workup Solvent	Volume (mL)	Density (g mL-1)	Mass (g)
Reactant C		3,5-Nitrobenzoic acid	24.4	212.17	1	0.115002	DCPEAC	2.86459	PPh3	262.29	36.1967	THF	287.4	0.889	255.499						0
		Benzyl alcohol	14.9236	108.14	1.2	0.138003	Fe(Pc)	6.53638							0						0
		Total	39.3236	320.31		0.253005		9.40096			36.1967				255.499		0				0
										Yield (%)	90
										AE (%)	94.3586						mass (g)	MW	mol
										RME (%)	79.5513					Product	31.2824	302.24	0.103502
										MI total (g g-1)	10.8821
										MI RRC (g g-1)	2.71466
										MI Solvents (g g-1)	8.16748
		METRICS
		Reactant (Limiting Reactant First)	Mass (g)	MW (g mmol-1)	equiv	Mol	Catalyst	Mass (g)	Reagent	MW (g mmol-1)	Mass (g)	Reaction Solvent	Volume (mL)	Density (g.mL-1)	Mass (g)	Work up Chemical	Mass (g)	Workup Solvent	Volume (mL)	Density (g mL-1)	Mass (g)
Reactant D		(2E)-3-[2-chloro-4-(cyclopentyloxy)-5-methoxyphenyl]acrylic acid	35.7385	310.77	1	0.115	DCPEAC	2.86454	PPh3	262.29	36.196	THF	287.4	0.889	255.499						0
		Benzyl alcohol	14.9233	108.14	1.2	0.138	Fe(Pc)	6.53626							0						0
		Total	50.6619	418.91		0.253		9.40079			36.196				255.499		0				0
										Yield (%)	90
										AE (%)	95.7007						mass (g)	MW	mol
										RME (%)	81.9021					Product	41.4931	400.9	0.1035
										MI total (g g-1)	8.47748
										MI RRC (g g-1)	2.31987
										MI Solvents (g g-1)	6.15761
		METRICS
		Reactant (Limiting Reactant First)	Mass (g)	MW (g mmol-1)	equiv	Mol	Catalyst	Mass (g)	Reagent	MW (g mmol-1)	Mass (g)	Reaction Solvent	Volume (mL)	Density (g.mL-1)	Mass (g)	Work up Chemical	Mass (g)	Workup Solvent	Volume (mL)	Density (g mL-1)	Mass (g)
Reactant E		Fmoc-D-Dab(Boc)-OH	50.6575	440.5	1	0.115	DCPEAC	2.86454	PPh3	262.29	36.196	THF	287.4	0.889	255.499						0
		Benzyl alcohol	14.9233	108.14	1.2	0.138	Fe(Pc)	6.53626							0						0
		Total	65.5808	548.64		0.253		9.40079			36.196				255.499		0				0
										Yield (%)	90
										AE (%)	96.7155						mass (g)	MW	mol
										RME (%)	83.7427					Product	54.9192	530.62	0.1035
										MI total (g g-1)	6.67665
										MI RRC (g g-1)	2.02439
										MI Solvents (g g-1)	4.65227
Simulation 6: PPh3 1.2 eq, DCPEAC 0.1 eq, Fe(Pc) 0.1 eq, Conc 0.8 M, yield of 90%
		METRICS
		Reactant (Limiting Reactant First)	Mass (g)	MW (g mmol-1)	equiv	Mol	Catalyst	Mass (g)	Reagent	MW (g mmol-1)	Mass (g)	Reaction Solvent	Volume (mL)	Density (g.mL-1)	Mass (g)	Work up Chemical	Mass (g)	Workup Solvent	Volume (mL)	Density (g mL-1)	Mass (g)
Reactant A		Benzoic acid	2.80876	122.12	1	0.023	DCPEAC	0.572907	PPh3	262.29	7.2392	THF	28.75	0.889	25.5587						0
		Benzyl alcohol	2.98466	108.14	1.2	0.0276	Fe(Pc)	1.30725							0						0
		Total	5.79342	230.26		0.0506		1.88016			7.2392				25.5587		0				0
										Yield (%)	90
										AE (%)	92.1784						mass (g)	MW	mol
										RME (%)	75.8373					Product	4.39358	212.25	0.0207
										MI total (g g-1)	9.21153
										MI RRC (g g-1)	3.39423
										MI Solvents (g g-1)	5.8173		Conc (M)	0.8
		METRICS
		Reactant (Limiting Reactant First)	Mass (g)	MW (g mmol-1)	equiv	Mol	Catalyst	Mass (g)	Reagent	MW (g mmol-1)	Mass (g)	Reaction Solvent	Volume (mL)	Density (g.mL-1)	Mass (g)	Work up Chemical	Mass (g)	Workup Solvent	Volume (mL)	Density (g mL-1)	Mass (g)
Reactant B		4-Chlorobenzoic acid	3.60111	156.57	1	0.023	DCPEAC	0.572907	PPh3	262.29	7.2392	THF	28.75	0.889	25.5587						0
		Benzyl alcohol	2.98466	108.14	1.2	0.0276	Fe(Pc)	1.30725							0						0
		Total	6.58577	264.71		0.0506		1.88016			7.2392				25.5587		0				0
										Yield (%)	90
										AE (%)	93.1926						mass (g)	MW	mol
										RME (%)	77.5381					Product	5.10648	246.69	0.0207
										MI total (g g-1)	8.08069
										MI RRC (g g-1)	3.07553
										MI Solvents (g g-1)	5.00516
		METRICS
		Reactant (Limiting Reactant First)	Mass (g)	MW (g mmol-1)	equiv	Mol	Catalyst	Mass (g)	Reagent	MW (g mmol-1)	Mass (g)	Reaction Solvent	Volume (mL)	Density (g.mL-1)	Mass (g)	Work up Chemical	Mass (g)	Workup Solvent	Volume (mL)	Density (g mL-1)	Mass (g)
Reactant C		3,5-Nitrobenzoic acid	4.87991	212.17	1	0.023	DCPEAC	0.572907	PPh3	262.29	7.2392	THF	28.75	0.889	25.5587						0
		Benzyl alcohol	2.98466	108.14	1.2	0.0276	Fe(Pc)	1.30725							0						0
		Total	7.86457	320.31		0.0506		1.88016			7.2392				25.5587		0				0
										Yield (%)	90
										AE (%)	94.3586						mass (g)	MW	mol
										RME (%)	79.5513					Product	6.25637	302.24	0.0207
										MI total (g g-1)	6.7999
										MI RRC (g g-1)	2.71466
										MI Solvents (g g-1)	4.08524
		METRICS
		Reactant (Limiting Reactant First)	Mass (g)	MW (g mmol-1)	equiv	Mol	Catalyst	Mass (g)	Reagent	MW (g mmol-1)	Mass (g)	Reaction Solvent	Volume (mL)	Density (g.mL-1)	Mass (g)	Work up Chemical	Mass (g)	Workup Solvent	Volume (mL)	Density (g mL-1)	Mass (g)
Reactant D		(2E)-3-[2-chloro-4-(cyclopentyloxy)-5-methoxyphenyl]acrylic acid	7.14771	310.77	1	0.023	DCPEAC	0.572907	PPh3	262.29	7.2392	THF	28.75	0.889	25.5587						0
		Benzyl alcohol	2.98466	108.14	1.2	0.0276	Fe(Pc)	1.30725							0						0
		Total	10.1324	418.91		0.0506		1.88016			7.2392				25.5587		0				0
										Yield (%)	90
										AE (%)	95.7007						mass (g)	MW	mol
										RME (%)	81.9021					Product	8.29863	400.9	0.0207
										MI total (g g-1)	5.39975
										MI RRC (g g-1)	2.31987
										MI Solvents (g g-1)	3.07988
		METRICS
		Reactant (Limiting Reactant First)	Mass (g)	MW (g mmol-1)	equiv	Mol	Catalyst	Mass (g)	Reagent	MW (g mmol-1)	Mass (g)	Reaction Solvent	Volume (mL)	Density (g.mL-1)	Mass (g)	Work up Chemical	Mass (g)	Workup Solvent	Volume (mL)	Density (g mL-1)	Mass (g)
Reactant E		Fmoc-D-Dab(Boc)-OH	10.1315	440.5	1	0.023	DCPEAC	0.572907	PPh3	262.29	7.2392	THF	28.75	0.889	25.5587						0
		Benzyl alcohol	2.98466	108.14	1.2	0.0276	Fe(Pc)	1.30725							0						0
		Total	13.1162	548.64		0.0506		1.88016			7.2392				25.5587		0				0
										Yield (%)	90
										AE (%)	96.7155						mass (g)	MW	mol
										RME (%)	83.7427					Product	10.9838	530.62	0.0207
										MI total (g g-1)	4.35133
										MI RRC (g g-1)	2.02439
										MI Solvents (g g-1)	2.32694
			Entry	Substrate	AE	RME	PMI	PMIRRC	PMIsolv
					(%)	(%)	(g g-1)	(g g-1)	(g g-1)
			Literature results		94.5435	70.1816	11.0913	3.883	7.20825
			Literature modified to simulation paramaters		94.5435	79.4083	10.4863	2.67029	7.81601
			Simulation 1: PPh3 1.2 eq, DCPEAC 0.1 eq, Fe(Pc) 0.1 eq, Conc 0.4 M, yield of 90%
			1	A	92.1784	75.8373	15.0288	3.39423	11.6346
			2	B	93.1926	77.5381	13.0858	3.07553	10.0103
			3	C	94.3586	79.5513	10.8851	2.71466	8.17048
			4	D	95.7007	81.9021	8.47962	2.31987	6.15975
			5	E	96.7155	83.7427	6.67827	2.02439	4.65388
			Simulation 2: PPh3 1.2 eq, DCPEAC 0.1 eq, Fe(Pc) 0.1 eq, Conc 0.4 M, yield of 80%
			1	A	92.1784	67.4109	16.9074	3.8185	13.0889
			2	B	93.1926	68.9227	14.7216	3.45997	11.2616
			3	C	94.3586	70.7122	12.2458	3.054	9.19178
			4	D	95.7007	72.8019	9.53957	2.60985	6.92972
			5	E	96.7155	74.438	7.51306	2.27743	5.23562
			Simulation 3: PPh3 1.2 eq, DCPEAC 0.1 eq, Fe(Pc) 0.1 eq, Conc 0.4 M, yield of 70%
			1	A	92.1784	58.9845	19.3228	4.364	14.9588
			2	B	93.1926	60.3074	16.8247	3.95425	12.8704
			3	C	94.3586	61.8732	13.9952	3.49028	10.5049
			4	D	95.7007	63.7017	10.9024	2.98269	7.91968
			5	E	96.7155	65.1332	8.58635	2.60278	5.98357
			Simulation 4: PPh3 1.2 eq, DCPEAC 0.1 eq, Fe(Pc) 0.1 eq, Conc 0.4 M, yield of 50%
			1	A	92.1784	42.1318	27.0519	6.10961	20.9423
			2	B	93.1926	43.0767	23.5545	5.53595	18.0186
			3	C	94.3586	44.1951	20.9818	6.27491	14.7069
			4	D	95.7007	45.5012	15.2633	4.17576	11.0876
			5	E	96.7155	46.5237	12.0209	3.6439	8.37699
			Simulation 5: PPh3 1.2 eq, DCPEAC 0.1 eq, Fe(Pc) 0.1 eq, Scale x5, Conc 0.4 M, yield of 90%
			1	A	92.1784	75.8373	15.0196	3.39423	11.6254
			2	B	93.1926	77.5381	13.0854	3.07553	10.0099
			3	C	94.3586	79.5513	10.8821	2.71466	8.16748
			4	D	95.7007	81.9021	8.47748	2.31987	6.15761
			5	E	96.7155	83.7427	6.67665	2.02439	4.65227
			Simulation 6: PPh3 1.2 eq, DCPEAC 0.1 eq, Fe(Pc) 0.1 eq, Conc 0.8 M, yield of 90%
			1	A	92.1784	75.8373	9.21153	3.39423	5.8173
			2	B	93.1926	77.5381	8.08069	3.07553	5.00516
			3	C	94.3586	79.5513	6.7999	2.71466	4.08524
			4	D	95.7007	81.9021	5.39975	2.31987	3.07988
			5	E	96.7155	83.7427	4.35133	2.02439	2.32694

## Sheet: Phosphine 0.1eq, DCPEAC 1.2eq
Literature conditions:
		Angew Chem Ind Ed. 2015, 54, 13041-13044
								To a 15 mL pressure tube equipped with a stir bar was added phosphine (18 mg, 0.10 equiv, 0.10 mmol) and 4-nitrobenzoic acid (250 mg, 1.5 equiv, 1.5 mmol). Then, THF (4 mL) was added followed by benzyl alcohol (103 mL, 1.0 equiv, 1.0 mmol), DIAD (216 mL, 1.1 equiv, 1.1 mmol), and phenylsilane (135 mL, 1.1 equiv, 1.1 mmol). The reaction vessel was sealed with a #15 O-ring and heated to 80 °C for 1…
		METRICS
		Reactant (Limiting Reactant First)	Mass (g)	MW (g mmol-1)	equiv	Mol	Catalyst	Mass (g)	Reagent	MW (g mmol-1)	Mass (g)	Reaction Solvent	Volume (mL)	Density (g.mL-1)	Mass (g)	Work up Chemical	Mass (g)	Workup Solvent	Volume (mL)	Density (g mL-1)	Mass (g)
		Benzyl alcohol	0.1	108.14	1	0.001	DIAD	0.222431	PhSiH3	108.21	0.119031	THF	4	0.889	3.556						0
		4-Nitrobenzoic acid	0.25	167.12	1.5	0.0015	Phosphine	0.018							0						0
		Total	0.35	275.26		0.0025		0.240431			0.119031				3.556		0				0
										Yield (%)	77
										AE (%)	93.4571						mass (g)	MW	mol
										RME (%)	56.595					Product	0.198083	257.25	0.00077
										MI total (g g-1)	21.5338
										MI RRC (g g-1)	3.58165
										MI Solvents (g g-1)	17.9521		Conc (M)	0.25
Literature conditions altered to equal our simulation conditions - Excess reactant 1.2 eq from 1.5 eq, DIAD 1.1 eq to DCPEAC 1.2 eq, Conc 0.4 M from 0.25 M, Yield 90% from 77%
		METRICS
		Reactant (Limiting Reactant First)	Mass (g)	MW (g mmol-1)	equiv	Mol	Catalyst	Mass (g)	Reagent	MW (g mmol-1)	Mass (g)	Reaction Solvent	Volume (mL)	Density (g.mL-1)	Mass (g)	Work up Chemical	Mass (g)	Workup Solvent	Volume (mL)	Density (g mL-1)	Mass (g)
		4-Nitrobenzoic acid	0.16712	167.12	1	0.001	DCPEAC	0.298908	PhSiH3	108.21	0.119031	THF	2.5	0.889	2.2225						0
		Benzyl alcohol	0.129768	108.14	1.2	0.0012	Phosphine	0.018							0						0
			0.296888	275.26		0.0022		0.316908			0.119031				2.2225		0				0
										Yield (%)	90
										AE (%)	93.4571						mass (g)	MW	mol
										RME (%)	77.984					Product	0.231525	257.25	0.0009
										MI total (g g-1)	12.7646
										MI RRC (g g-1)	3.16522
										MI Solvents (g g-1)	9.5994		Conc (M)	0.4
Simulation 1: Phosphine 0.1 eq, DCPEAC 1.2 eq, PhSih3 1.1 eq, Conc 0.4 M, yield of 90%
		METRICS
		Reactant (Limiting Reactant First)	Mass (g)	MW (g mmol-1)	equiv	Mol	Catalyst	Mass (g)	Reagent	MW (g mmol-1)	Mass (g)	Reaction Solvent	Volume (mL)	Density (g.mL-1)	Mass (g)	Work up Chemical	Mass (g)	Workup Solvent	Volume (mL)	Density (g mL-1)	Mass (g)
Reactant A		Benzoic acid	2.80876	122.12	1	0.023	DCPEAC	6.87488	PhSiH3	108.21	2.73771	THF	57.5	0.889	51.1175						0
		Benzyl alcohol	2.98466	108.14	1.2	0.0276	Phosphine	0.414437							0						0
		Total	5.79342	230.26		0.0506		7.28932			2.73771				51.1175		0				0
										Yield (%)	90
										AE (%)	92.1784						mass (g)	MW	mol
										RME (%)	75.8373					Product	4.39358	212.25	0.0207
										MI total (g g-1)	15.2354
										MI RRC (g g-1)	3.60082
										MI Solvents (g g-1)	11.6346		Conc (M)	0.4
		METRICS
		Reactant (Limiting Reactant First)	Mass (g)	MW (g mmol-1)	equiv	Mol	Catalyst	Mass (g)	Reagent	MW (g mmol-1)	Mass (g)	Reaction Solvent	Volume (mL)	Density (g.mL-1)	Mass (g)	Work up Chemical	Mass (g)	Workup Solvent	Volume (mL)	Density (g mL-1)	Mass (g)
Reactant B		4-Chlorobenzoic acid	3.60111	156.57	1	0.023	DCPEAC	6.87488	PhSiH3	108.21	2.73771	THF	57.5	0.889	51.1175						0
		Benzyl alcohol	2.98466	108.14	1.2	0.0276	Phosphine	0.414437							0						0
		Total	6.58577	264.71		0.0506		7.28932			2.73771				51.1175		0				0
										Yield (%)	90
										AE (%)	93.1926						mass (g)	MW	mol
										RME (%)	77.5381					Product	5.10648	246.69	0.0207
										MI total (g g-1)	13.2636
										MI RRC (g g-1)	3.25328
										MI Solvents (g g-1)	10.0103		Conc (M)	0.4
		METRICS
		Reactant (Limiting Reactant First)	Mass (g)	MW (g mmol-1)	equiv	Mol	Catalyst	Mass (g)	Reagent	MW (g mmol-1)	Mass (g)	Reaction Solvent	Volume (mL)	Density (g.mL-1)	Mass (g)	Work up Chemical	Mass (g)	Workup Solvent	Volume (mL)	Density (g mL-1)	Mass (g)
Reactant C		3,5-Nitrobenzoic acid	4.87991	212.17	1	0.023	DCPEAC	6.87488	PhSiH3	108.21	2.73771	THF	57.5	0.889	51.1175						0
		Benzyl alcohol	2.98466	108.14	1.2	0.0276	Phosphine	0.414437							0						0
		Total	7.86457	320.31		0.0506		7.28932			2.73771				51.1175		0				0
										Yield (%)	90
										AE (%)	94.3586						mass (g)	MW	mol
										RME (%)	79.5513					Product	6.25637	302.24	0.0207
										MI total (g g-1)	11.0302
										MI RRC (g g-1)	2.85974
										MI Solvents (g g-1)	8.17048		Conc (M)	0.4
		METRICS
		Reactant (Limiting Reactant First)	Mass (g)	MW (g mmol-1)	equiv	Mol	Catalyst	Mass (g)	Reagent	MW (g mmol-1)	Mass (g)	Reaction Solvent	Volume (mL)	Density (g.mL-1)	Mass (g)	Work up Chemical	Mass (g)	Workup Solvent	Volume (mL)	Density (g mL-1)	Mass (g)
Reactant D		(2E)-3-[2-chloro-4-(cyclopentyloxy)-5-methoxyphenyl]acrylic acid	7.14771	310.77	1	0.023	DCPEAC	6.87488	PhSiH3	108.21	2.73771	THF	57.5	0.889	51.1175						0
		Benzyl alcohol	2.98466	108.14	1.2	0.0276	Phosphine	0.414437							0						0
		Total	10.1324	418.91		0.0506		7.28932			2.73771				51.1175		0				0
										Yield (%)	90
										AE (%)	95.7007						mass (g)	MW	mol
										RME (%)	81.9021					Product	8.29863	400.9	0.0207
										MI total (g g-1)	8.589
										MI RRC (g g-1)	2.42925
										MI Solvents (g g-1)	6.15975		Conc (M)	0.4
		METRICS
		Reactant (Limiting Reactant First)	Mass (g)	MW (g mmol-1)	equiv	Mol	Catalyst	Mass (g)	Reagent	MW (g mmol-1)	Mass (g)	Reaction Solvent	Volume (mL)	Density (g.mL-1)	Mass (g)	Work up Chemical	Mass (g)	Workup Solvent	Volume (mL)	Density (g mL-1)	Mass (g)
Reactant E		Fmoc-D-Dab(Boc)-OH	10.1315	440.5	1	0.023	DCPEAC	6.87488	PhSiH3	108.21	2.73771	THF	57.5	0.889	51.1175						0
		Benzyl alcohol	2.98466	108.14	1.2	0.0276	Phosphine	0.414437							0						0
		Total	13.1162	548.64		0.0506		7.28932			2.73771				51.1175		0				0
										Yield (%)	90
										AE (%)	96.7155						mass (g)	MW	mol
										RME (%)	83.7427					Product	10.9838	530.62	0.0207
										MI total (g g-1)	6.76091
										MI RRC (g g-1)	2.10702
										MI Solvents (g g-1)	4.65388		Conc (M)	0.4
Simulation 2: Phosphine 0.1 eq, DCPEAC 1.2 eq, PhSih3 1.1 eq, Conc 0.4 M, yield of 80%
		METRICS
		Reactant (Limiting Reactant First)	Mass (g)	MW (g mmol-1)	equiv	Mol	Catalyst	Mass (g)	Reagent	MW (g mmol-1)	Mass (g)	Reaction Solvent	Volume (mL)	Density (g.mL-1)	Mass (g)	Work up Chemical	Mass (g)	Workup Solvent	Volume (mL)	Density (g mL-1)	Mass (g)
Reactant A		Benzoic acid	2.80876	122.12	1	0.023	DCPEAC	6.87488	PhSiH3	108.21	2.73771	THF	28.75	0.889	25.5587						0
		Benzyl alcohol	2.98466	108.14	1.2	0.0276	Phosphine	0.414437							0						0
		Total	5.79342	230.26		0.0506		7.28932			2.73771				25.5587		0				0
										Yield (%)	80
										AE (%)	92.1784						mass (g)	MW	mol
										RME (%)	67.4109					Product	3.9054	212.25	0.0184
										MI total (g g-1)	10.5954
										MI RRC (g g-1)	4.05092
										MI Solvents (g g-1)	6.54446		Conc (M)	0.8
		METRICS
		Reactant (Limiting Reactant First)	Mass (g)	MW (g mmol-1)	equiv	Mol	Catalyst	Mass (g)	Reagent	MW (g mmol-1)	Mass (g)	Reaction Solvent	Volume (mL)	Density (g.mL-1)	Mass (g)	Work up Chemical	Mass (g)	Workup Solvent	Volume (mL)	Density (g mL-1)	Mass (g)
Reactant B		4-Chlorobenzoic acid	3.60111	156.57	1	0.023	DCPEAC	6.87488	PhSiH3	108.21	2.73771	THF	28.75	0.889	25.5587						0
		Benzyl alcohol	2.98466	108.14	1.2	0.0276	Phosphine	0.414437							0						0
		Total	6.58577	264.71		0.0506		7.28932			2.73771				25.5587		0				0
										Yield (%)	80
										AE (%)	93.1926						mass (g)	MW	mol
										RME (%)	68.9227					Product	4.5391	246.69	0.0184
										MI total (g g-1)	9.29074
										MI RRC (g g-1)	3.65994
										MI Solvents (g g-1)	5.6308
		METRICS
		Reactant (Limiting Reactant First)	Mass (g)	MW (g mmol-1)	equiv	Mol	Catalyst	Mass (g)	Reagent	MW (g mmol-1)	Mass (g)	Reaction Solvent	Volume (mL)	Density (g.mL-1)	Mass (g)	Work up Chemical	Mass (g)	Workup Solvent	Volume (mL)	Density (g mL-1)	Mass (g)
Reactant C		3,5-Nitrobenzoic acid	4.87991	212.17	1	0.023	DCPEAC	6.87488	PhSiH3	108.21	2.73771	THF	28.75	0.889	25.5587						0
		Benzyl alcohol	2.98466	108.14	1.2	0.0276	Phosphine	0.414437							0						0
		Total	7.86457	320.31		0.0506		7.28932			2.73771				25.5587		0				0
										Yield (%)	80
										AE (%)	94.3586						mass (g)	MW	mol
										RME (%)	70.7122					Product	5.56122	302.24	0.0184
										MI total (g g-1)	7.8131
										MI RRC (g g-1)	3.21721
										MI Solvents (g g-1)	4.59589
		METRICS
		Reactant (Limiting Reactant First)	Mass (g)	MW (g mmol-1)	equiv	Mol	Catalyst	Mass (g)	Reagent	MW (g mmol-1)	Mass (g)	Reaction Solvent	Volume (mL)	Density (g.mL-1)	Mass (g)	Work up Chemical	Mass (g)	Workup Solvent	Volume (mL)	Density (g mL-1)	Mass (g)
Reactant D		(2E)-3-[2-chloro-4-(cyclopentyloxy)-5-methoxyphenyl]acrylic acid	7.14771	310.77	1	0.023	DCPEAC	6.87488	PhSiH3	108.21	2.73771	THF	28.75	0.889	25.5587						0
		Benzyl alcohol	2.98466	108.14	1.2	0.0276	Phosphine	0.414437							0						0
		Total	10.1324	418.91		0.0506		7.28932			2.73771				25.5587		0				0
										Yield (%)	80
										AE (%)	95.7007						mass (g)	MW	mol
										RME (%)	72.8019					Product	7.37656	400.9	0.0184
										MI total (g g-1)	6.19776
										MI RRC (g g-1)	2.7329
										MI Solvents (g g-1)	3.46486
		METRICS
		Reactant (Limiting Reactant First)	Mass (g)	MW (g mmol-1)	equiv	Mol	Catalyst	Mass (g)	Reagent	MW (g mmol-1)	Mass (g)	Reaction Solvent	Volume (mL)	Density (g.mL-1)	Mass (g)	Work up Chemical	Mass (g)	Workup Solvent	Volume (mL)	Density (g mL-1)	Mass (g)
Reactant E		Fmoc-D-Dab(Boc)-OH	10.1315	440.5	1	0.023	DCPEAC	6.87488	PhSiH3	108.21	2.73771	THF	28.75	0.889	25.5587						0
		Benzyl alcohol	2.98466	108.14	1.2	0.0276	Phosphine	0.414437							0						0
		Total	13.1162	548.64		0.0506		7.28932			2.73771				25.5587		0				0
										Yield (%)	80
										AE (%)	96.7155						mass (g)	MW	mol
										RME (%)	74.438					Product	9.76341	530.62	0.0184
										MI total (g g-1)	4.98821
										MI RRC (g g-1)	2.3704
										MI Solvents (g g-1)	2.61781
Simulation 3: Phosphine 0.1 eq, DCPEAC 1.2 eq, PhSih3 1.1 eq, Conc 0.4 M, yield of 70%
		METRICS
		Reactant (Limiting Reactant First)	Mass (g)	MW (g mmol-1)	equiv	Mol	Catalyst	Mass (g)	Reagent	MW (g mmol-1)	Mass (g)	Reaction Solvent	Volume (mL)	Density (g.mL-1)	Mass (g)	Work up Chemical	Mass (g)	Workup Solvent	Volume (mL)	Density (g mL-1)	Mass (g)
Reactant A		Benzoic acid	2.80876	122.12	1	0.023	DCPEAC	6.87488	PhSiH3	108.21	2.73771	THF	57.5	0.889	51.1175						0
		Benzyl alcohol	2.98466	108.14	1.2	0.0276	Phosphine	0.414437							0						0
		Total	5.79342	230.26		0.0506		7.28932			2.73771				51.1175		0				0
										Yield (%)	70
										AE (%)	92.1784						mass (g)	MW	mol
										RME (%)	58.9845					Product	3.41722	212.25	0.0161
										MI total (g g-1)	19.5884
										MI RRC (g g-1)	4.62962
										MI Solvents (g g-1)	14.9588		Conc (M)	0.4
		METRICS
		Reactant (Limiting Reactant First)	Mass (g)	MW (g mmol-1)	equiv	Mol	Catalyst	Mass (g)	Reagent	MW (g mmol-1)	Mass (g)	Reaction Solvent	Volume (mL)	Density (g.mL-1)	Mass (g)	Work up Chemical	Mass (g)	Workup Solvent	Volume (mL)	Density (g mL-1)	Mass (g)
Reactant B		4-Chlorobenzoic acid	3.60111	156.57	1	0.023	DCPEAC	6.87488	PhSiH3	108.21	2.73771	THF	57.5	0.889	51.1175						0
		Benzyl alcohol	2.98466	108.14	1.2	0.0276	Phosphine	0.414437							0						0
		Total	6.58577	264.71		0.0506		7.28932			2.73771				51.1175		0				0
										Yield (%)	70
										AE (%)	93.1926						mass (g)	MW	mol
										RME (%)	60.3074					Product	3.97171	246.69	0.0161
										MI total (g g-1)	17.0532
										MI RRC (g g-1)	4.18279
										MI Solvents (g g-1)	12.8704
		METRICS
		Reactant (Limiting Reactant First)	Mass (g)	MW (g mmol-1)	equiv	Mol	Catalyst	Mass (g)	Reagent	MW (g mmol-1)	Mass (g)	Reaction Solvent	Volume (mL)	Density (g.mL-1)	Mass (g)	Work up Chemical	Mass (g)	Workup Solvent	Volume (mL)	Density (g mL-1)	Mass (g)
Reactant C		3,5-Nitrobenzoic acid	4.87991	212.17	1	0.023	DCPEAC	6.87488	PhSiH3	108.21	2.73771	THF	57.5	0.889	51.1175						0
		Benzyl alcohol	2.98466	108.14	1.2	0.0276	Phosphine	0.414437							0						0
		Total	7.86457	320.31		0.0506		7.28932			2.73771				51.1175		0				0
										Yield (%)	70
										AE (%)	94.3586						mass (g)	MW	mol
										RME (%)	61.8732					Product	4.86606	302.24	0.0161
										MI total (g g-1)	14.1817
										MI RRC (g g-1)	3.67681
										MI Solvents (g g-1)	10.5049
		METRICS
		Reactant (Limiting Reactant First)	Mass (g)	MW (g mmol-1)	equiv	Mol	Catalyst	Mass (g)	Reagent	MW (g mmol-1)	Mass (g)	Reaction Solvent	Volume (mL)	Density (g.mL-1)	Mass (g)	Work up Chemical	Mass (g)	Workup Solvent	Volume (mL)	Density (g mL-1)	Mass (g)
Reactant D		(2E)-3-[2-chloro-4-(cyclopentyloxy)-5-methoxyphenyl]acrylic acid	7.14771	310.77	1	0.023	DCPEAC	6.87488	PhSiH3	108.21	2.73771	THF	57.5	0.889	51.1175						0
		Benzyl alcohol	2.98466	108.14	1.2	0.0276	Phosphine	0.414437							0						0
		Total	10.1324	418.91		0.0506		7.28932			2.73771				51.1175		0				0
										Yield (%)	70
										AE (%)	95.7007						mass (g)	MW	mol
										RME (%)	63.7017					Product	6.45449	400.9	0.0161
										MI total (g g-1)	11.043
										MI RRC (g g-1)	3.12332
										MI Solvents (g g-1)	7.91968
		METRICS
		Reactant (Limiting Reactant First)	Mass (g)	MW (g mmol-1)	equiv	Mol	Catalyst	Mass (g)	Reagent	MW (g mmol-1)	Mass (g)	Reaction Solvent	Volume (mL)	Density (g.mL-1)	Mass (g)	Work up Chemical	Mass (g)	Workup Solvent	Volume (mL)	Density (g mL-1)	Mass (g)
Reactant E		Fmoc-D-Dab(Boc)-OH	10.1315	440.5	1	0.023	DCPEAC	6.87488	PhSiH3	108.21	2.73771	THF	57.5	0.889	51.1175						0
		Benzyl alcohol	2.98466	108.14	1.2	0.0276	Phosphine	0.414437							0						0
		Total	13.1162	548.64		0.0506		7.28932			2.73771				51.1175		0				0
										Yield (%)	70
										AE (%)	96.7155						mass (g)	MW	mol
										RME (%)	65.1332					Product	8.54298	530.62	0.0161
										MI total (g g-1)	8.6926
										MI RRC (g g-1)	2.70903
										MI Solvents (g g-1)	5.98357
Simulation 4: Phosphine 0.1 eq, DCPEAC 1.2 eq, PhSih3 1.1 eq, Conc 0.4 M, yield of 50%
		METRICS
		Reactant (Limiting Reactant First)	Mass (g)	MW (g mmol-1)	equiv	Mol	Catalyst	Mass (g)	Reagent	MW (g mmol-1)	Mass (g)	Reaction Solvent	Volume (mL)	Density (g.mL-1)	Mass (g)	Work up Chemical	Mass (g)	Workup Solvent	Volume (mL)	Density (g mL-1)	Mass (g)
Reactant A		Benzoic acid	2.80876	122.12	1	0.023	DCPEAC	6.87488	PhSiH3	108.21	2.73771	THF	57.5	0.889	51.1175						0
		Benzyl alcohol	2.98466	108.14	1.2	0.0276	Phosphine	0.414437							0						0
		Total	5.79342	230.26		0.0506		7.28932			2.73771				51.1175		0				0
										Yield (%)	50
										AE (%)	92.1784						mass (g)	MW	mol
										RME (%)	42.1318					Product	2.44088	212.25	0.0115
										MI total (g g-1)	27.4238
										MI RRC (g g-1)	6.48147
										MI Solvents (g g-1)	20.9423		Conc (M)	0.4
		METRICS
		Reactant (Limiting Reactant First)	Mass (g)	MW (g mmol-1)	equiv	Mol	Catalyst	Mass (g)	Reagent	MW (g mmol-1)	Mass (g)	Reaction Solvent	Volume (mL)	Density (g.mL-1)	Mass (g)	Work up Chemical	Mass (g)	Workup Solvent	Volume (mL)	Density (g mL-1)	Mass (g)
Reactant B		4-Chlorobenzoic acid	3.60111	156.57	1	0.023	DCPEAC	6.87488	PhSiH3	108.21	2.73771	THF	57.5	0.889	51.1175						0
		Benzyl alcohol	2.98466	108.14	1.2	0.0276	Phosphine	0.414437							0						0
		Total	6.58577	264.71		0.0506		7.28932			2.73771				51.1175		0				0
										Yield (%)	50
										AE (%)	93.1926						mass (g)	MW	mol
										RME (%)	43.0767					Product	2.83693	246.69	0.0115
										MI total (g g-1)	23.8745
										MI RRC (g g-1)	5.8559
										MI Solvents (g g-1)	18.0186
		METRICS
		Reactant (Limiting Reactant First)	Mass (g)	MW (g mmol-1)	equiv	Mol	Catalyst	Mass (g)	Reagent	MW (g mmol-1)	Mass (g)	Reaction Solvent	Volume (mL)	Density (g.mL-1)	Mass (g)	Work up Chemical	Mass (g)	Workup Solvent	Volume (mL)	Density (g mL-1)	Mass (g)
Reactant C		3,5-Nitrobenzoic acid	4.87991	212.17	1	0.023	DCPEAC	6.87488	PhSiH3	108.21	2.73771	THF	57.5	0.889	51.1175						0
		Benzyl alcohol	2.98466	108.14	1.2	0.0276	Phosphine	0.414437							0						0
		Total	7.86457	320.31		0.0506		7.28932			2.73771				51.1175		0				0
										Yield (%)	50
										AE (%)	94.3586						mass (g)	MW	mol
										RME (%)	44.1951					Product	3.47576	302.24	0.0115
										MI total (g g-1)	19.8544
										MI RRC (g g-1)	5.14754
										MI Solvents (g g-1)	14.7069
		METRICS
		Reactant (Limiting Reactant First)	Mass (g)	MW (g mmol-1)	equiv	Mol	Catalyst	Mass (g)	Reagent	MW (g mmol-1)	Mass (g)	Reaction Solvent	Volume (mL)	Density (g.mL-1)	Mass (g)	Work up Chemical	Mass (g)	Workup Solvent	Volume (mL)	Density (g mL-1)	Mass (g)
Reactant D		(2E)-3-[2-chloro-4-(cyclopentyloxy)-5-methoxyphenyl]acrylic acid	7.14771	310.77	1	0.023	DCPEAC	6.87488	PhSiH3	108.21	2.73771	THF	57.5	0.889	51.1175						0
		Benzyl alcohol	2.98466	108.14	1.2	0.0276	Phosphine	0.414437							0						0
		Total	10.1324	418.91		0.0506		7.28932			2.73771				51.1175		0				0
										Yield (%)	50
										AE (%)	95.7007						mass (g)	MW	mol
										RME (%)	45.5012					Product	4.61035	400.9	0.0115
										MI total (g g-1)	15.4602
										MI RRC (g g-1)	4.37264
										MI Solvents (g g-1)	11.0876
		METRICS
		Reactant (Limiting Reactant First)	Mass (g)	MW (g mmol-1)	equiv	Mol	Catalyst	Mass (g)	Reagent	MW (g mmol-1)	Mass (g)	Reaction Solvent	Volume (mL)	Density (g.mL-1)	Mass (g)	Work up Chemical	Mass (g)	Workup Solvent	Volume (mL)	Density (g mL-1)	Mass (g)
Reactant E		Fmoc-D-Dab(Boc)-OH	10.1315	440.5	1	0.023	DCPEAC	6.87488	PhSiH3	108.21	2.73771	THF	57.5	0.889	51.1175						0
		Benzyl alcohol	2.98466	108.14	1.2	0.0276	Phosphine	0.414437							0						0
		Total	13.1162	548.64		0.0506		7.28932			2.73771				51.1175		0				0
										Yield (%)	50
										AE (%)	96.7155						mass (g)	MW	mol
										RME (%)	46.5237					Product	6.10213	530.62	0.0115
										MI total (g g-1)	12.1696
										MI RRC (g g-1)	3.79264
										MI Solvents (g g-1)	8.37699
Simulation 5: Phosphine 0.1 eq, DCPEAC 1.2 eq, PhSih3 1.1 eq, Scale x5, Conc 0.4 M, yield of 90%
		METRICS
		Reactant (Limiting Reactant First)	Mass (g)	MW (g mmol-1)	equiv	Mol	Catalyst	Mass (g)	Reagent	MW (g mmol-1)	Mass (g)	Reaction Solvent	Volume (mL)	Density (g.mL-1)	Mass (g)	Work up Chemical	Mass (g)	Workup Solvent	Volume (mL)	Density (g mL-1)	Mass (g)
Reactant A		Benzoic acid	14.05	122.12	1	0.115051	DCPEAC	34.3896	PhSiH3	108.21	13.6946	THF	287.5	0.889	255.588						0
		Benzyl alcohol	14.9299	108.14	1.2	0.138061	Phosphine	2.0731							0						0
		Total	28.9799	230.26		0.253112		36.4627			13.6946				255.588		0				0
										Yield (%)	90
										AE (%)	92.1784						mass (g)	MW	mol
										RME (%)	75.8373					Product	21.9776	212.25	0.103546
										MI total (g g-1)	15.2303
										MI RRC (g g-1)	3.60082
										MI Solvents (g g-1)	11.6295		Conc (M)	0.400177
		METRICS
		Reactant (Limiting Reactant First)	Mass (g)	MW (g mmol-1)	equiv	Mol	Catalyst	Mass (g)	Reagent	MW (g mmol-1)	Mass (g)	Reaction Solvent	Volume (mL)	Density (g.mL-1)	Mass (g)	Work up Chemical	Mass (g)	Workup Solvent	Volume (mL)	Density (g mL-1)	Mass (g)
Reactant B		4-Chlorobenzoic acid	18	156.57	1	0.114965	DCPEAC	34.3638	PhSiH3	108.21	13.6843	THF	287.5	0.889	255.588						0
		Benzyl alcohol	14.9187	108.14	1.2	0.137957	Phosphine	2.07155							0						0
		Total	32.9187	264.71		0.252922		36.4354			13.6843				255.588		0				0
										Yield (%)	90
										AE (%)	93.1926						mass (g)	MW	mol
										RME (%)	77.5381					Product	25.5245	246.69	0.103468
										MI total (g g-1)	13.2667
										MI RRC (g g-1)	3.25328
										MI Solvents (g g-1)	10.0134
		METRICS
		Reactant (Limiting Reactant First)	Mass (g)	MW (g mmol-1)	equiv	Mol	Catalyst	Mass (g)	Reagent	MW (g mmol-1)	Mass (g)	Reaction Solvent	Volume (mL)	Density (g.mL-1)	Mass (g)	Work up Chemical	Mass (g)	Workup Solvent	Volume (mL)	Density (g mL-1)	Mass (g)
Reactant C		3,5-Nitrobenzoic acid	24.4	212.17	1	0.115002	DCPEAC	34.3751	PhSiH3	108.21	13.6888	THF	287.5	0.889	255.588						0
		Benzyl alcohol	14.9236	108.14	1.2	0.138003	Phosphine	2.07222							0						0
		Total	39.3236	320.31		0.253005		36.4473			13.6888				255.588		0				0
										Yield (%)	90
										AE (%)	94.3586						mass (g)	MW	mol
										RME (%)	79.5513					Product	31.2824	302.24	0.103502
										MI total (g g-1)	11.0301
										MI RRC (g g-1)	2.85974
										MI Solvents (g g-1)	8.17032
		METRICS
		Reactant (Limiting Reactant First)	Mass (g)	MW (g mmol-1)	equiv	Mol	Catalyst	Mass (g)	Reagent	MW (g mmol-1)	Mass (g)	Reaction Solvent	Volume (mL)	Density (g.mL-1)	Mass (g)	Work up Chemical	Mass (g)	Workup Solvent	Volume (mL)	Density (g mL-1)	Mass (g)
Reactant D		(2E)-3-[2-chloro-4-(cyclopentyloxy)-5-methoxyphenyl]acrylic acid	35.7385	310.77	1	0.115	DCPEAC	34.3744	PhSiH3	108.21	13.6886	THF	287.5	0.889	255.588						0
		Benzyl alcohol	14.9233	108.14	1.2	0.138	Phosphine	2.07218							0						0
		Total	50.6619	418.91		0.253		36.4466			13.6886				255.588		0				0
										Yield (%)	90
										AE (%)	95.7007						mass (g)	MW	mol
										RME (%)	81.9021					Product	41.4931	400.9	0.1035
										MI total (g g-1)	8.589
										MI RRC (g g-1)	2.42925
										MI Solvents (g g-1)	6.15975
		METRICS
		Reactant (Limiting Reactant First)	Mass (g)	MW (g mmol-1)	equiv	Mol	Catalyst	Mass (g)	Reagent	MW (g mmol-1)	Mass (g)	Reaction Solvent	Volume (mL)	Density (g.mL-1)	Mass (g)	Work up Chemical	Mass (g)	Workup Solvent	Volume (mL)	Density (g mL-1)	Mass (g)
Reactant E		Fmoc-D-Dab(Boc)-OH	50.6575	440.5	1	0.115	DCPEAC	34.3744	PhSiH3	108.21	13.6886	THF	287.5	0.889	255.588						0
		Benzyl alcohol	14.9233	108.14	1.2	0.138	Phosphine	2.07218							0						0
		Total	65.5808	548.64		0.253		36.4466			13.6886				255.588		0				0
										Yield (%)	90
										AE (%)	96.7155						mass (g)	MW	mol
										RME (%)	83.7427					Product	54.9192	530.62	0.1035
										MI total (g g-1)	6.76091
										MI RRC (g g-1)	2.10702
										MI Solvents (g g-1)	4.65388
Simulation 6: Phosphine 0.1 eq, DCPEAC 1.2 eq, PhSih3 1.1 eq, Conc 0.8 M, yield of 90%
		METRICS
		Reactant (Limiting Reactant First)	Mass (g)	MW (g mmol-1)	equiv	Mol	Catalyst	Mass (g)	Reagent	MW (g mmol-1)	Mass (g)	Reaction Solvent	Volume (mL)	Density (g.mL-1)	Mass (g)	Work up Chemical	Mass (g)	Workup Solvent	Volume (mL)	Density (g mL-1)	Mass (g)
Reactant A		Benzoic acid	2.80876	122.12	1	0.023	DCPEAC	6.87488	PhSiH3	108.21	2.73771	THF	28.75	0.889	25.5587						0
		Benzyl alcohol	2.98466	108.14	1.2	0.0276	Phosphine	0.414437							0						0
		Total	5.79342	230.26		0.0506		7.28932			2.73771				25.5587		0				0
										Yield (%)	90
										AE (%)	92.1784						mass (g)	MW	mol
										RME (%)	75.8373					Product	4.39358	212.25	0.0207
										MI total (g g-1)	9.41812
										MI RRC (g g-1)	3.60082
										MI Solvents (g g-1)	5.8173		Conc (M)	0.8
		METRICS
		Reactant (Limiting Reactant First)	Mass (g)	MW (g mmol-1)	equiv	Mol	Catalyst	Mass (g)	Reagent	MW (g mmol-1)	Mass (g)	Reaction Solvent	Volume (mL)	Density (g.mL-1)	Mass (g)	Work up Chemical	Mass (g)	Workup Solvent	Volume (mL)	Density (g mL-1)	Mass (g)
Reactant B		4-Chlorobenzoic acid	3.60111	156.57	1	0.023	DCPEAC	6.87488	PhSiH3	108.21	2.73771	THF	28.75	0.889	25.5587						0
		Benzyl alcohol	2.98466	108.14	1.2	0.0276	Phosphine	0.414437							0						0
		Total	6.58577	264.71		0.0506		7.28932			2.73771				25.5587		0				0
										Yield (%)	90
										AE (%)	93.1926						mass (g)	MW	mol
										RME (%)	77.5381					Product	5.10648	246.69	0.0207
										MI total (g g-1)	8.25844
										MI RRC (g g-1)	3.25328
										MI Solvents (g g-1)	5.00516
		METRICS
		Reactant (Limiting Reactant First)	Mass (g)	MW (g mmol-1)	equiv	Mol	Catalyst	Mass (g)	Reagent	MW (g mmol-1)	Mass (g)	Reaction Solvent	Volume (mL)	Density (g.mL-1)	Mass (g)	Work up Chemical	Mass (g)	Workup Solvent	Volume (mL)	Density (g mL-1)	Mass (g)
Reactant C		3,5-Nitrobenzoic acid	4.87991	212.17	1	0.023	DCPEAC	6.87488	PhSiH3	108.21	2.73771	THF	28.75	0.889	25.5587						0
		Benzyl alcohol	2.98466	108.14	1.2	0.0276	Phosphine	0.414437							0						0
		Total	7.86457	320.31		0.0506		7.28932			2.73771				25.5587		0				0
										Yield (%)	90
										AE (%)	94.3586						mass (g)	MW	mol
										RME (%)	79.5513					Product	6.25637	302.24	0.0207
										MI total (g g-1)	6.94498
										MI RRC (g g-1)	2.85974
										MI Solvents (g g-1)	4.08524
		METRICS
		Reactant (Limiting Reactant First)	Mass (g)	MW (g mmol-1)	equiv	Mol	Catalyst	Mass (g)	Reagent	MW (g mmol-1)	Mass (g)	Reaction Solvent	Volume (mL)	Density (g.mL-1)	Mass (g)	Work up Chemical	Mass (g)	Workup Solvent	Volume (mL)	Density (g mL-1)	Mass (g)
Reactant D		(2E)-3-[2-chloro-4-(cyclopentyloxy)-5-methoxyphenyl]acrylic acid	7.14771	310.77	1	0.023	DCPEAC	6.87488	PhSiH3	108.21	2.73771	THF	28.75	0.889	25.5587						0
		Benzyl alcohol	2.98466	108.14	1.2	0.0276	Phosphine	0.414437							0						0
		Total	10.1324	418.91		0.0506		7.28932			2.73771				25.5587		0				0
										Yield (%)	90
										AE (%)	95.7007						mass (g)	MW	mol
										RME (%)	81.9021					Product	8.29863	400.9	0.0207
										MI total (g g-1)	5.50912
										MI RRC (g g-1)	2.42925
										MI Solvents (g g-1)	3.07988
		METRICS
		Reactant (Limiting Reactant First)	Mass (g)	MW (g mmol-1)	equiv	Mol	Catalyst	Mass (g)	Reagent	MW (g mmol-1)	Mass (g)	Reaction Solvent	Volume (mL)	Density (g.mL-1)	Mass (g)	Work up Chemical	Mass (g)	Workup Solvent	Volume (mL)	Density (g mL-1)	Mass (g)
Reactant E		Fmoc-D-Dab(Boc)-OH	10.1315	440.5	1	0.023	DCPEAC	6.87488	PhSiH3	108.21	2.73771	THF	28.75	0.889	25.5587						0
		Benzyl alcohol	2.98466	108.14	1.2	0.0276	Phosphine	0.414437							0						0
		Total	13.1162	548.64		0.0506		7.28932			2.73771				25.5587		0				0
										Yield (%)	90
										AE (%)	96.7155						mass (g)	MW	mol
										RME (%)	83.7427					Product	10.9838	530.62	0.0207
										MI total (g g-1)	4.43397
										MI RRC (g g-1)	2.10702
										MI Solvents (g g-1)	2.32694
			Entry	Substrate	AE	RME	PMI	PMIRRC	PMIsolv
					(%)	(%)	(g g-1)	(g g-1)	(g g-1)
			Literature results		93.4571	56.595	21.5338	3.58165	17.9521
			Literature modified to simulation paramaters		93.4571	77.984	12.7646	3.16522	9.5994
			Simulation 1: Phosphine 0.1 eq, DCPEAC 1.2 eq, PhSih3 1.1 eq, Conc 0.4 M, yield of 90%
			1	A	92.1784	75.8373	15.2354	3.60082	11.6346
			2	B	93.1926	77.5381	13.2636	3.25328	10.0103
			3	C	94.3586	79.5513	11.0302	2.85974	8.17048
			4	D	95.7007	81.9021	8.589	2.42925	6.15975
			5	E	96.7155	83.7427	6.76091	2.10702	4.65388
			Simulation 2: Phosphine 0.1 eq, DCPEAC 1.2 eq, PhSih3 1.1 eq, Conc 0.4 M, yield of 80%
			1	A	92.1784	67.4109	10.5954	4.05092	6.54446
			2	B	93.1926	68.9227	9.29074	3.65994	5.6308
			3	C	94.3586	70.7122	7.8131	3.21721	4.59589
			4	D	95.7007	72.8019	6.19776	2.7329	3.46486
			5	E	96.7155	74.438	4.98821	2.3704	2.61781
			Simulation 3: Phosphine 0.1 eq, DCPEAC 1.2 eq, PhSih3 1.1 eq, Conc 0.4 M, yield of 70%
			1	A	92.1784	58.9845	19.5884	4.62962	14.9588
			2	B	93.1926	60.3074	17.0532	4.18279	12.8704
			3	C	94.3586	61.8732	14.1817	3.67681	10.5049
			4	D	95.7007	63.7017	11.043	3.12332	7.91968
			5	E	96.7155	65.1332	8.6926	2.70903	5.98357
			Simulation 4: Phosphine 0.1 eq, DCPEAC 1.2 eq, PhSih3 1.1 eq, Conc 0.4 M, yield of 50%
			1	A	92.1784	42.1318	27.4238	6.48147	20.9423
			2	B	93.1926	43.0767	23.8745	5.8559	18.0186
			3	C	94.3586	44.1951	19.8544	5.14754	14.7069
			4	D	95.7007	45.5012	15.4602	4.37264	11.0876
			5	E	96.7155	46.5237	12.1696	3.79264	8.37699
			Simulation 5: Phosphine 0.1 eq, DCPEAC 1.2 eq, PhSih3 1.1 eq, Scale x5, Conc 0.4 M, yield of 90%
			1	A	92.1784	75.8373	15.2303	3.60082	11.6295
			2	B	93.1926	77.5381	13.2667	3.25328	10.0134
			3	C	94.3586	79.5513	11.0301	2.85974	8.17032
			4	D	95.7007	81.9021	8.589	2.42925	6.15975
			5	E	96.7155	83.7427	6.76091	2.10702	4.65388
			Simulation 6: Phosphine 0.1 eq, DCPEAC 1.2 eq, PhSih3 1.1 eq, Conc 0.8 M, yield of 90%
			1	A	92.1784	75.8373	9.41812	3.60082	5.8173
			2	B	93.1926	77.5381	8.25844	3.25328	5.00516
			3	C	94.3586	79.5513	6.94498	2.85974	4.08524
			4	D	95.7007	81.9021	5.50912	2.42925	3.07988
			5	E	96.7155	83.7427	4.43397	2.10702	2.32694

## Sheet: "Fully catalytic"
Literature conditions:
		Angew Chem Ind Ed. 2015, 54, 13041-13044
										To a 35 mL pressure tube equipped with a stir bar was added phosphine (9.0 mg, 0.10 equiv, 0.05 mmol), DCPEAC (12.5 mg, 0.10 equiv, 0.05 mmol), Fe(pc) (28.5 mg, 0.10 equiv, 0.05 mmol), 4-nitrobenzoic acid (125 mg, 1.5 equiv, 0.75 mmol), and 5 è powdered molecular sieves (500 mg). THF (3 mL) was added followed by 4-methoxybenzyl alcohol (62 mL, 1.0 equiv, 0.50 mmol), and phenylsilane (68 mL, 1.1 e…
		METRICS
		Reactant (Limiting Reactant First)	Mass (g)	MW (g mmol-1)	equiv	Mol	Catalyst	Mass (g)	Reagent	MW (g mmol-1)	Mass (g)	Reaction Solvent	Volume (mL)	Density (g.mL-1)	Mass (g)	Work up Chemical	Mass (g)	Workup Solvent	Volume (mL)	Density (g mL-1)	Mass (g)
		4-Methoxybenzyl alcohol	0.069	138.17	1	0.000499385	DCPEAC	0.0125	PhSiH3	108.21	0.0594423	THF	3	0.889	2.667						0
		4-Nitrobenzoic acid	0.125186	167.12	1.5	0.000749077	Phosphine	0.00899841													0
							Fe(Pc)	0.0283835
		Total	0.194186	305.29		0.00124846		0.0498819			0.0594423				2.667		0				0
										Yield (%)	63
										AE (%)	94.0974						mass (g)	MW	mol
										RME (%)	46.5424					Product	0.0903787	287.27	0.000314612
										MI total (g g-1)	32.8674
										MI RRC (g g-1)	3.3582
										MI Solvents (g g-1)	29.5092		Conc (M)	0.166462
Literature conditions altered to equal our simulation conditions - Excess reactant 1.2 eq from 1.5 eq, Conc 0.4 M from 0.17 M, Yield 90% from 63%
		METRICS
		Reactant (Limiting Reactant First)	Mass (g)	MW (g mmol-1)	equiv	Mol	Catalyst	Mass (g)	Reagent	MW (g mmol-1)	Mass (g)	Reaction Solvent	Volume (mL)	Density (g.mL-1)	Mass (g)	Work up Chemical	Mass (g)	Workup Solvent	Volume (mL)	Density (g mL-1)	Mass (g)
		4-Nitrobenzoic acid	0.08356	167.12	1	0.0005	DCPEAC	0.0125	PhSiH3	108.21	0.0595155	THF	1.25	0.889	1.11125						0
		4-methoxybenzyl alcohol	0.082902	138.17	1.2	0.0006	Phosphine	0.0090095													0
							Fe(Pc)	0.0284185
			0.166462	305.29		0.0011		0.049928			0.0595155				1.11125		0				0
										Yield (%)	90
										AE (%)	94.0974						mass (g)	MW	mol
										RME (%)	77.6583					Product	0.129272	287.27	0.00045
										MI total (g g-1)	10.7306
										MI RRC (g g-1)	2.13431
										MI Solvents (g g-1)	8.59625		Conc (M)	0.4
Simulation 1: Phosphine 0.1 eq, DCPEAC 0.1 eq, Fe(Pc) 0.1 eq, PhSih3 1.1 eq, Conc 0.4 M, yield of 90%
		METRICS
		Reactant (Limiting Reactant First)	Mass (g)	MW (g mmol-1)	equiv	Mol	Catalyst	Mass (g)	Reagent	MW (g mmol-1)	Mass (g)	Reaction Solvent	Volume (mL)	Density (g.mL-1)	Mass (g)	Work up Chemical	Mass (g)	Workup Solvent	Volume (mL)	Density (g mL-1)	Mass (g)
Reactant A		Benzoic acid	2.80876	122.12	1	0.023	DCPEAC	0.572907	PhSiH3	108.21	2.73771	THF	57.5	0.889	51.1175						0
		Benzyl alcohol	2.98466	108.14	1.2	0.0276	Phosphine	0.414437													0
							Fe(Pc)	1.30725
		Total	5.79342	230.26		0.0506		2.2946			2.73771				51.1175		0				0
										Yield (%)	90
										AE (%)	92.1784						mass (g)	MW	mol
										RME (%)	75.8373					Product	4.39358	212.25	0.0207
										MI total (g g-1)	14.0986
										MI RRC (g g-1)	2.46399
										MI Solvents (g g-1)	11.6346		Conc (M)	0.4
		METRICS
		Reactant (Limiting Reactant First)	Mass (g)	MW (g mmol-1)	equiv	Mol	Catalyst	Mass (g)	Reagent	MW (g mmol-1)	Mass (g)	Reaction Solvent	Volume (mL)	Density (g.mL-1)	Mass (g)	Work up Chemical	Mass (g)	Workup Solvent	Volume (mL)	Density (g mL-1)	Mass (g)
Reactant B		4-Chlorobenzoic acid	3.60111	156.57	1	0.023	DCPEAC	0.572907	PhSiH3	108.21	2.73771	THF	57.5	0.889	51.1175						0
		Benzyl alcohol	2.98466	108.14	1.2	0.0276	Phosphine	0.414437													0
							Fe(Pc)	1.30725
		Total	6.58577	264.71		0.0506		2.2946			2.73771				51.1175		0				0
										Yield (%)	90
										AE (%)	93.1926						mass (g)	MW	mol
										RME (%)	77.5381					Product	5.10648	246.69	0.0207
										MI total (g g-1)	12.2855
										MI RRC (g g-1)	2.27516
										MI Solvents (g g-1)	10.0103		Conc (M)	0.4
		METRICS
		Reactant (Limiting Reactant First)	Mass (g)	MW (g mmol-1)	equiv	Mol	Catalyst	Mass (g)	Reagent	MW (g mmol-1)	Mass (g)	Reaction Solvent	Volume (mL)	Density (g.mL-1)	Mass (g)	Work up Chemical	Mass (g)	Workup Solvent	Volume (mL)	Density (g mL-1)	Mass (g)
Reactant C		3,5-Nitrobenzoic acid	4.87991	212.17	1	0.023	DCPEAC	0.572907	PhSiH3	108.21	2.73771	THF	57.5	0.889	51.1175						0
		Benzyl alcohol	2.98466	108.14	1.2	0.0276	Phosphine	0.414437													0
							Fe(Pc)	1.30725
		Total	7.86457	320.31		0.0506		2.2946			2.73771				51.1175		0				0
										Yield (%)	90
										AE (%)	94.3586						mass (g)	MW	mol
										RME (%)	79.5513					Product	6.25637	302.24	0.0207
										MI total (g g-1)	10.2319
										MI RRC (g g-1)	2.0614
										MI Solvents (g g-1)	8.17048		Conc (M)	0.4
		METRICS
		Reactant (Limiting Reactant First)	Mass (g)	MW (g mmol-1)	equiv	Mol	Catalyst	Mass (g)	Reagent	MW (g mmol-1)	Mass (g)	Reaction Solvent	Volume (mL)	Density (g.mL-1)	Mass (g)	Work up Chemical	Mass (g)	Workup Solvent	Volume (mL)	Density (g mL-1)	Mass (g)
Reactant D		(2E)-3-[2-chloro-4-(cyclopentyloxy)-5-methoxyphenyl]acrylic acid	7.14771	310.77	1	0.023	DCPEAC	0.572907	PhSiH3	108.21	2.73771	THF	57.5	0.889	51.1175						0
		Benzyl alcohol	2.98466	108.14	1.2	0.0276	Phosphine	0.414437													0
							Fe(Pc)	1.30725
		Total	10.1324	418.91		0.0506		2.2946			2.73771				51.1175		0				0
										Yield (%)	90
										AE (%)	95.7007						mass (g)	MW	mol
										RME (%)	81.9021					Product	8.29863	400.9	0.0207
										MI total (g g-1)	7.98712
										MI RRC (g g-1)	1.82737
										MI Solvents (g g-1)	6.15975		Conc (M)	0.4
		METRICS
		Reactant (Limiting Reactant First)	Mass (g)	MW (g mmol-1)	equiv	Mol	Catalyst	Mass (g)	Reagent	MW (g mmol-1)	Mass (g)	Reaction Solvent	Volume (mL)	Density (g.mL-1)	Mass (g)	Work up Chemical	Mass (g)	Workup Solvent	Volume (mL)	Density (g mL-1)	Mass (g)
Reactant E		Fmoc-D-Dab(Boc)-OH	10.1315	440.5	1	0.023	DCPEAC	0.572907	PhSiH3	108.21	2.73771	THF	57.5	0.889	51.1175						0
		Benzyl alcohol	2.98466	108.14	1.2	0.0276	Phosphine	0.414437													0
							Fe(Pc)	1.30725
		Total	13.1162	548.64		0.0506		2.29459			2.73771				51.1175		0				0
										Yield (%)	90
										AE (%)	96.7155						mass (g)	MW	mol
										RME (%)	83.7427					Product	10.9838	530.62	0.0207
										MI total (g g-1)	6.30617
										MI RRC (g g-1)	1.65229
										MI Solvents (g g-1)	4.65388		Conc (M)	0.4
Simulation 2: DCPEAC 0.1 eq, Phosphine 0.1 eq, Fe(Pc) 0.1 eq, PhSi 1.1 eq, Conc 0.4 M, yield of 80%
		METRICS
		Reactant (Limiting Reactant First)	Mass (g)	MW (g mmol-1)	equiv	Mol	Catalyst	Mass (g)	Reagent	MW (g mmol-1)	Mass (g)	Reaction Solvent	Volume (mL)	Density (g.mL-1)	Mass (g)	Work up Chemical	Mass (g)	Workup Solvent	Volume (mL)	Density (g mL-1)	Mass (g)
Reactant A		Benzoic acid	2.80876	122.12	1	0.023	DCPEAC	0.572907	PhSiH3	108.21	2.73771	THF	57.5	0.889	51.1175						0
		Benzyl alcohol	2.98466	108.14	1.2	0.0276	Phosphine	0.414437													0
							Fe(Pc)	1.30725
		Total	5.79342	230.26		0.0506		2.2946			2.73771				51.1175		0				0
										Yield (%)	80
										AE (%)	92.1784						mass (g)	MW	mol
										RME (%)	67.4109					Product	3.9054	212.25	0.0184
										MI total (g g-1)	15.8609
										MI RRC (g g-1)	2.77199
										MI Solvents (g g-1)	13.0889		Conc (M)	0.4
		METRICS
		Reactant (Limiting Reactant First)	Mass (g)	MW (g mmol-1)	equiv	Mol	Catalyst	Mass (g)	Reagent	MW (g mmol-1)	Mass (g)	Reaction Solvent	Volume (mL)	Density (g.mL-1)	Mass (g)	Work up Chemical	Mass (g)	Workup Solvent	Volume (mL)	Density (g mL-1)	Mass (g)
Reactant B		4-Chlorobenzoic acid	3.60111	156.57	1	0.023	DCPEAC	0.572907	PhSiH3	108.21	2.73771	THF	57.5	0.889	51.1175						0
		Benzyl alcohol	2.98466	108.14	1.2	0.0276	Phosphine	0.414437													0
							Fe(Pc)	1.30725
		Total	6.58577	264.71		0.0506		2.2946			2.73771				51.1175		0				0
										Yield (%)	80
										AE (%)	93.1926						mass (g)	MW	mol
										RME (%)	68.9227					Product	4.5391	246.69	0.0184
										MI total (g g-1)	13.8212
										MI RRC (g g-1)	2.55956
										MI Solvents (g g-1)	11.2616
		METRICS
		Reactant (Limiting Reactant First)	Mass (g)	MW (g mmol-1)	equiv	Mol	Catalyst	Mass (g)	Reagent	MW (g mmol-1)	Mass (g)	Reaction Solvent	Volume (mL)	Density (g.mL-1)	Mass (g)	Work up Chemical	Mass (g)	Workup Solvent	Volume (mL)	Density (g mL-1)	Mass (g)
Reactant C		3,5-Nitrobenzoic acid	4.87991	212.17	1	0.023	DCPEAC	0.572907	PhSiH3	108.21	2.73771	THF	57.5	0.889	51.1175						0
		Benzyl alcohol	2.98466	108.14	1.2	0.0276	Phosphine	0.414437													0
							Fe(Pc)	1.30725
		Total	7.86457	320.31		0.0506		2.2946			2.73771				51.1175		0				0
										Yield (%)	80
										AE (%)	94.3586						mass (g)	MW	mol
										RME (%)	70.7122					Product	5.56122	302.24	0.0184
										MI total (g g-1)	11.5109
										MI RRC (g g-1)	2.31908
										MI Solvents (g g-1)	9.19178
		METRICS
		Reactant (Limiting Reactant First)	Mass (g)	MW (g mmol-1)	equiv	Mol	Catalyst	Mass (g)	Reagent	MW (g mmol-1)	Mass (g)	Reaction Solvent	Volume (mL)	Density (g.mL-1)	Mass (g)	Work up Chemical	Mass (g)	Workup Solvent	Volume (mL)	Density (g mL-1)	Mass (g)
Reactant D		(2E)-3-[2-chloro-4-(cyclopentyloxy)-5-methoxyphenyl]acrylic acid	7.14771	310.77	1	0.023	DCPEAC	0.572907	PhSiH3	108.21	2.73771	THF	57.5	0.889	51.1175						0
		Benzyl alcohol	2.98466	108.14	1.2	0.0276	Phosphine	0.414437													0
							Fe(Pc)	1.30725
		Total	10.1324	418.91		0.0506		2.2946			2.73771				51.1175		0				0
										Yield (%)	80
										AE (%)	95.7007						mass (g)	MW	mol
										RME (%)	72.8019					Product	7.37656	400.9	0.0184
										MI total (g g-1)	8.98551
										MI RRC (g g-1)	2.05579
										MI Solvents (g g-1)	6.92972
		METRICS
		Reactant (Limiting Reactant First)	Mass (g)	MW (g mmol-1)	equiv	Mol	Catalyst	Mass (g)	Reagent	MW (g mmol-1)	Mass (g)	Reaction Solvent	Volume (mL)	Density (g.mL-1)	Mass (g)	Work up Chemical	Mass (g)	Workup Solvent	Volume (mL)	Density (g mL-1)	Mass (g)
Reactant E		Fmoc-D-Dab(Boc)-OH	10.1315	440.5	1	0.023	DCPEAC	0.572907	PhSiH3	108.21	2.73771	THF	57.5	0.889	51.1175						0
		Benzyl alcohol	2.98466	108.14	1.2	0.0276	Phosphine	0.414437													0
							Fe(Pc)	1.30725
		Total	13.1162	548.64		0.0506		2.29459			2.73771				51.1175		0				0
										Yield (%)	80
										AE (%)	96.7155						mass (g)	MW	mol
										RME (%)	74.438					Product	9.76341	530.62	0.0184
										MI total (g g-1)	7.09445
										MI RRC (g g-1)	1.85883
										MI Solvents (g g-1)	5.23562
Simulation 3: DCPEAC 0.1 eq, Phosphine 0.1 eq, Fe(Pc) 0.1 eq, PhSi 1.1 eq, Conc 0.4 M, yield of 70%
		METRICS
		Reactant (Limiting Reactant First)	Mass (g)	MW (g mmol-1)	equiv	Mol	Catalyst	Mass (g)	Reagent	MW (g mmol-1)	Mass (g)	Reaction Solvent	Volume (mL)	Density (g.mL-1)	Mass (g)	Work up Chemical	Mass (g)	Workup Solvent	Volume (mL)	Density (g mL-1)	Mass (g)
Reactant A		Benzoic acid	2.80876	122.12	1	0.023	DCPEAC	0.572907	PhSiH3	108.21	2.73771	THF	57.5	0.889	51.1175						0
		Benzyl alcohol	2.98466	108.14	1.2	0.0276	Phosphine	0.414437													0
							Fe(Pc)	1.30725
		Total	5.79342	230.26		0.0506		2.2946			2.73771				51.1175		0				0
										Yield (%)	70
										AE (%)	92.1784						mass (g)	MW	mol
										RME (%)	58.9845					Product	3.41722	212.25	0.0161
										MI total (g g-1)	18.1268
										MI RRC (g g-1)	3.16799
										MI Solvents (g g-1)	14.9588		Conc (M)	0.4
		METRICS
		Reactant (Limiting Reactant First)	Mass (g)	MW (g mmol-1)	equiv	Mol	Catalyst	Mass (g)	Reagent	MW (g mmol-1)	Mass (g)	Reaction Solvent	Volume (mL)	Density (g.mL-1)	Mass (g)	Work up Chemical	Mass (g)	Workup Solvent	Volume (mL)	Density (g mL-1)	Mass (g)
Reactant B		4-Chlorobenzoic acid	3.60111	156.57	1	0.023	DCPEAC	0.572907	PhSiH3	108.21	2.73771	THF	57.5	0.889	51.1175						0
		Benzyl alcohol	2.98466	108.14	1.2	0.0276	Phosphine	0.414437													0
							Fe(Pc)	1.30725
		Total	6.58577	264.71		0.0506		2.2946			2.73771				51.1175		0				0
										Yield (%)	70
										AE (%)	93.1926						mass (g)	MW	mol
										RME (%)	60.3074					Product	3.97171	246.69	0.0161
										MI total (g g-1)	15.7956
										MI RRC (g g-1)	2.92521
										MI Solvents (g g-1)	12.8704
		METRICS
		Reactant (Limiting Reactant First)	Mass (g)	MW (g mmol-1)	equiv	Mol	Catalyst	Mass (g)	Reagent	MW (g mmol-1)	Mass (g)	Reaction Solvent	Volume (mL)	Density (g.mL-1)	Mass (g)	Work up Chemical	Mass (g)	Workup Solvent	Volume (mL)	Density (g mL-1)	Mass (g)
Reactant C		3,5-Nitrobenzoic acid	4.87991	212.17	1	0.023	DCPEAC	0.572907	PhSiH3	108.21	2.73771	THF	57.5	0.889	51.1175						0
		Benzyl alcohol	2.98466	108.14	1.2	0.0276	Phosphine	0.414437													0
							Fe(Pc)	1.30725
		Total	7.86457	320.31		0.0506		2.2946			2.73771				51.1175		0				0
										Yield (%)	70
										AE (%)	94.3586						mass (g)	MW	mol
										RME (%)	61.8732					Product	4.86606	302.24	0.0161
										MI total (g g-1)	13.1553
										MI RRC (g g-1)	2.65037
										MI Solvents (g g-1)	10.5049
		METRICS
		Reactant (Limiting Reactant First)	Mass (g)	MW (g mmol-1)	equiv	Mol	Catalyst	Mass (g)	Reagent	MW (g mmol-1)	Mass (g)	Reaction Solvent	Volume (mL)	Density (g.mL-1)	Mass (g)	Work up Chemical	Mass (g)	Workup Solvent	Volume (mL)	Density (g mL-1)	Mass (g)
Reactant D		(2E)-3-[2-chloro-4-(cyclopentyloxy)-5-methoxyphenyl]acrylic acid	7.14771	310.77	1	0.023	DCPEAC	0.572907	PhSiH3	108.21	2.73771	THF	57.5	0.889	51.1175						0
		Benzyl alcohol	2.98466	108.14	1.2	0.0276	Phosphine	0.414437													0
							Fe(Pc)	1.30725
		Total	10.1324	418.91		0.0506		2.2946			2.73771				51.1175		0				0
										Yield (%)	70
										AE (%)	95.7007						mass (g)	MW	mol
										RME (%)	63.7017					Product	6.45449	400.9	0.0161
										MI total (g g-1)	10.2692
										MI RRC (g g-1)	2.34948
										MI Solvents (g g-1)	7.91968
		METRICS
		Reactant (Limiting Reactant First)	Mass (g)	MW (g mmol-1)	equiv	Mol	Catalyst	Mass (g)	Reagent	MW (g mmol-1)	Mass (g)	Reaction Solvent	Volume (mL)	Density (g.mL-1)	Mass (g)	Work up Chemical	Mass (g)	Workup Solvent	Volume (mL)	Density (g mL-1)	Mass (g)
Reactant E		Fmoc-D-Dab(Boc)-OH	10.1315	440.5	1	0.023	DCPEAC	0.572907	PhSiH3	108.21	2.73771	THF	57.5	0.889	51.1175						0
		Benzyl alcohol	2.98466	108.14	1.2	0.0276	Phosphine	0.414437													0
							Fe(Pc)	1.30725
		Total	13.1162	548.64		0.0506		2.29459			2.73771				51.1175		0				0
										Yield (%)	70
										AE (%)	96.7155						mass (g)	MW	mol
										RME (%)	65.1332					Product	8.54298	530.62	0.0161
										MI total (g g-1)	8.10794
										MI RRC (g g-1)	2.12437
										MI Solvents (g g-1)	5.98357
Simulation 4: DDCPEAC 0.1 eq, Phosphine 0.1 eq, Fe(Pc) 0.1 eq, PhSi 1.1 eq, Conc 0.4 M, yield of 50%
		METRICS
		Reactant (Limiting Reactant First)	Mass (g)	MW (g mmol-1)	equiv	Mol	Catalyst	Mass (g)	Reagent	MW (g mmol-1)	Mass (g)	Reaction Solvent	Volume (mL)	Density (g.mL-1)	Mass (g)	Work up Chemical	Mass (g)	Workup Solvent	Volume (mL)	Density (g mL-1)	Mass (g)
Reactant A		Benzoic acid	2.80876	122.12	1	0.023	DCPEAC	0.572907	PhSiH3	108.21	2.73771	THF	57.5	0.889	51.1175						0
		Benzyl alcohol	2.98466	108.14	1.2	0.0276	Phosphine	0.414437													0
							Fe(Pc)	1.30725
		Total	5.79342	230.26		0.0506		2.2946			2.73771				51.1175		0				0
										Yield (%)	50
										AE (%)	92.1784						mass (g)	MW	mol
										RME (%)	42.1318					Product	2.44088	212.25	0.0115
										MI total (g g-1)	25.3775
										MI RRC (g g-1)	4.43518
										MI Solvents (g g-1)	20.9423		Conc (M)	0.4
		METRICS
		Reactant (Limiting Reactant First)	Mass (g)	MW (g mmol-1)	equiv	Mol	Catalyst	Mass (g)	Reagent	MW (g mmol-1)	Mass (g)	Reaction Solvent	Volume (mL)	Density (g.mL-1)	Mass (g)	Work up Chemical	Mass (g)	Workup Solvent	Volume (mL)	Density (g mL-1)	Mass (g)
Reactant B		4-Chlorobenzoic acid	3.60111	156.57	1	0.023	DCPEAC	0.572907	PhSiH3	108.21	2.73771	THF	57.5	0.889	51.1175						0
		Benzyl alcohol	2.98466	108.14	1.2	0.0276	Phosphine	0.414437													0
							Fe(Pc)	1.30725
		Total	6.58577	264.71		0.0506		2.2946			2.73771				51.1175		0				0
										Yield (%)	50
										AE (%)	93.1926						mass (g)	MW	mol
										RME (%)	43.0767					Product	2.83693	246.69	0.0115
										MI total (g g-1)	22.1139
										MI RRC (g g-1)	4.09529
										MI Solvents (g g-1)	18.0186
		METRICS
		Reactant (Limiting Reactant First)	Mass (g)	MW (g mmol-1)	equiv	Mol	Catalyst	Mass (g)	Reagent	MW (g mmol-1)	Mass (g)	Reaction Solvent	Volume (mL)	Density (g.mL-1)	Mass (g)	Work up Chemical	Mass (g)	Workup Solvent	Volume (mL)	Density (g mL-1)	Mass (g)
Reactant C		3,5-Nitrobenzoic acid	4.87991	212.17	1	0.023	DCPEAC	0.572907	PhSiH3	108.21	2.73771	THF	57.5	0.889	51.1175						0
		Benzyl alcohol	2.98466	108.14	1.2	0.0276	Phosphine	0.414437													0
							Fe(Pc)	1.30725
		Total	7.86457	320.31		0.0506		2.2946			2.73771				51.1175		0				0
										Yield (%)	50
										AE (%)	94.3586						mass (g)	MW	mol
										RME (%)	44.1951					Product	3.47576	302.24	0.0115
										MI total (g g-1)	18.4174
										MI RRC (g g-1)	3.71052
										MI Solvents (g g-1)	14.7069
		METRICS
		Reactant (Limiting Reactant First)	Mass (g)	MW (g mmol-1)	equiv	Mol	Catalyst	Mass (g)	Reagent	MW (g mmol-1)	Mass (g)	Reaction Solvent	Volume (mL)	Density (g.mL-1)	Mass (g)	Work up Chemical	Mass (g)	Workup Solvent	Volume (mL)	Density (g mL-1)	Mass (g)
Reactant D		(2E)-3-[2-chloro-4-(cyclopentyloxy)-5-methoxyphenyl]acrylic acid	7.14771	310.77	1	0.023	DCPEAC	0.572907	PhSiH3	108.21	2.73771	THF	57.5	0.889	51.1175						0
		Benzyl alcohol	2.98466	108.14	1.2	0.0276	Phosphine	0.414437													0
							Fe(Pc)	1.30725
		Total	10.1324	418.91		0.0506		2.2946			2.73771				51.1175		0				0
										Yield (%)	50
										AE (%)	95.7007						mass (g)	MW	mol
										RME (%)	45.5012					Product	4.61035	400.9	0.0115
										MI total (g g-1)	14.3768
										MI RRC (g g-1)	3.28927
										MI Solvents (g g-1)	11.0876
		METRICS
		Reactant (Limiting Reactant First)	Mass (g)	MW (g mmol-1)	equiv	Mol	Catalyst	Mass (g)	Reagent	MW (g mmol-1)	Mass (g)	Reaction Solvent	Volume (mL)	Density (g.mL-1)	Mass (g)	Work up Chemical	Mass (g)	Workup Solvent	Volume (mL)	Density (g mL-1)	Mass (g)
Reactant E		Fmoc-D-Dab(Boc)-OH	10.1315	440.5	1	0.023	DCPEAC	0.572907	PhSiH3	108.21	2.73771	THF	57.5	0.889	51.1175						0
		Benzyl alcohol	2.98466	108.14	1.2	0.0276	Phosphine	0.414437													0
							Fe(Pc)	1.30725
		Total	13.1162	548.64		0.0506		2.29459			2.73771				51.1175		0				0
										Yield (%)	50
										AE (%)	96.7155						mass (g)	MW	mol
										RME (%)	46.5237					Product	6.10213	530.62	0.0115
										MI total (g g-1)	11.3511
										MI RRC (g g-1)	2.97412
										MI Solvents (g g-1)	8.37699
Simulation 5: DCPEAC 0.1 eq, Phosphine 0.1 eq, Fe(Pc) 0.1 eq, PhSi 1.1 eq, Scale x5, Conc 0.4 M, yield of 90%
		METRICS
		Reactant (Limiting Reactant First)	Mass (g)	MW (g mmol-1)	equiv	Mol	Catalyst	Mass (g)	Reagent	MW (g mmol-1)	Mass (g)	Reaction Solvent	Volume (mL)	Density (g.mL-1)	Mass (g)	Work up Chemical	Mass (g)	Workup Solvent	Volume (mL)	Density (g mL-1)	Mass (g)
Reactant A		Benzoic acid	14.05	122.12	1	0.115051	DCPEAC	2.8658	PhSiH3	108.21	13.6946	THF	287.5	0.889	255.588						0
		Benzyl alcohol	14.9299	108.14	1.2	0.138061	Phosphine	2.0731													0
							Fe(Pc)	6.53914
		Total	28.9799	230.26		0.253112		11.478			13.6946				255.588		0				0
										Yield (%)	90
										AE (%)	92.1784						mass (g)	MW	mol
										RME (%)	75.8373					Product	21.9776	212.25	0.103546
										MI total (g g-1)	14.0935
										MI RRC (g g-1)	2.46399
										MI Solvents (g g-1)	11.6295		Conc (M)	0.400177
		METRICS
		Reactant (Limiting Reactant First)	Mass (g)	MW (g mmol-1)	equiv	Mol	Catalyst	Mass (g)	Reagent	MW (g mmol-1)	Mass (g)	Reaction Solvent	Volume (mL)	Density (g.mL-1)	Mass (g)	Work up Chemical	Mass (g)	Workup Solvent	Volume (mL)	Density (g mL-1)	Mass (g)
Reactant B		4-Chlorobenzoic acid	18	156.57	1	0.114965	DCPEAC	2.86365	PhSiH3	108.21	13.6843	THF	287.5	0.889	255.588						0
		Benzyl alcohol	14.9187	108.14	1.2	0.137957	Phosphine	2.07155													0
							Fe(Pc)	6.53424
		Total	32.9187	264.71		0.252922		11.4694			13.6843				255.588		0				0
										Yield (%)	90
										AE (%)	93.1926						mass (g)	MW	mol
										RME (%)	77.5381					Product	25.5245	246.69	0.103468
										MI total (g g-1)	12.2886
										MI RRC (g g-1)	2.27516
										MI Solvents (g g-1)	10.0134
		METRICS
		Reactant (Limiting Reactant First)	Mass (g)	MW (g mmol-1)	equiv	Mol	Catalyst	Mass (g)	Reagent	MW (g mmol-1)	Mass (g)	Reaction Solvent	Volume (mL)	Density (g.mL-1)	Mass (g)	Work up Chemical	Mass (g)	Workup Solvent	Volume (mL)	Density (g mL-1)	Mass (g)
Reactant C		3,5-Nitrobenzoic acid	24.4	212.17	1	0.115002	DCPEAC	2.86459	PhSiH3	108.21	13.6888	THF	287.5	0.889	255.588						0
		Benzyl alcohol	14.9236	108.14	1.2	0.138003	Phosphine	2.07222													0
							Fe(Pc)	6.53638
		Total	39.3236	320.31		0.253005		11.4732			13.6888				255.588		0				0
										Yield (%)	90
										AE (%)	94.3586						mass (g)	MW	mol
										RME (%)	79.5513					Product	31.2824	302.24	0.103502
										MI total (g g-1)	10.2317
										MI RRC (g g-1)	2.0614
										MI Solvents (g g-1)	8.17032
		METRICS
		Reactant (Limiting Reactant First)	Mass (g)	MW (g mmol-1)	equiv	Mol	Catalyst	Mass (g)	Reagent	MW (g mmol-1)	Mass (g)	Reaction Solvent	Volume (mL)	Density (g.mL-1)	Mass (g)	Work up Chemical	Mass (g)	Workup Solvent	Volume (mL)	Density (g mL-1)	Mass (g)
Reactant D		(2E)-3-[2-chloro-4-(cyclopentyloxy)-5-methoxyphenyl]acrylic acid	35.7385	310.77	1	0.115	DCPEAC	2.86454	PhSiH3	108.21	13.6886	THF	287.5	0.889	255.588						0
		Benzyl alcohol	14.9233	108.14	1.2	0.138	Phosphine	2.07218													0
							Fe(Pc)	6.53625
		Total	50.6619	418.91		0.253		11.473			13.6886				255.588		0				0
										Yield (%)	90
										AE (%)	95.7007						mass (g)	MW	mol
										RME (%)	81.9021					Product	41.4931	400.9	0.1035
										MI total (g g-1)	7.98712
										MI RRC (g g-1)	1.82737
										MI Solvents (g g-1)	6.15975
		METRICS
		Reactant (Limiting Reactant First)	Mass (g)	MW (g mmol-1)	equiv	Mol	Catalyst	Mass (g)	Reagent	MW (g mmol-1)	Mass (g)	Reaction Solvent	Volume (mL)	Density (g.mL-1)	Mass (g)	Work up Chemical	Mass (g)	Workup Solvent	Volume (mL)	Density (g mL-1)	Mass (g)
Reactant E		Fmoc-D-Dab(Boc)-OH	50.6575	440.5	1	0.115	DCPEAC	2.86454	PhSiH3	108.21	13.6886	THF	287.5	0.889	255.588						0
		Benzyl alcohol	14.9233	108.14	1.2	0.138	Phosphine	2.07218													0
							Fe(Pc)	6.53625
		Total	65.5808	548.64		0.253		11.473			13.6886				255.588		0				0
										Yield (%)	90
										AE (%)	96.7155						mass (g)	MW	mol
										RME (%)	83.7427					Product	54.9192	530.62	0.1035
										MI total (g g-1)	6.30617
										MI RRC (g g-1)	1.65229
										MI Solvents (g g-1)	4.65388
Simulation 6: DCPEAC 0.1 eq, Phosphine 0.1 eq, Fe(Pc) 0.1 eq, PhSi 1.1 eq, Conc 0.8 M, yield of 90%
		METRICS
		Reactant (Limiting Reactant First)	Mass (g)	MW (g mmol-1)	equiv	Mol	Catalyst	Mass (g)	Reagent	MW (g mmol-1)	Mass (g)	Reaction Solvent	Volume (mL)	Density (g.mL-1)	Mass (g)	Work up Chemical	Mass (g)	Workup Solvent	Volume (mL)	Density (g mL-1)	Mass (g)
Reactant A		Benzoic acid	2.80876	122.12	1	0.023	DCPEAC	0.572907	PhSiH3	108.21	2.73771	THF	28.75	0.889	25.5587						0
		Benzyl alcohol	2.98466	108.14	1.2	0.0276	Phosphine	0.414437													0
							Fe(Pc)	1.30725
		Total	5.79342	230.26		0.0506		2.2946			2.73771				25.5587		0				0
										Yield (%)	90
										AE (%)	92.1784						mass (g)	MW	mol
										RME (%)	75.8373					Product	4.39358	212.25	0.0207
										MI total (g g-1)	8.28129
										MI RRC (g g-1)	2.46399
										MI Solvents (g g-1)	5.8173		Conc (M)	0.8
		METRICS
		Reactant (Limiting Reactant First)	Mass (g)	MW (g mmol-1)	equiv	Mol	Catalyst	Mass (g)	Reagent	MW (g mmol-1)	Mass (g)	Reaction Solvent	Volume (mL)	Density (g.mL-1)	Mass (g)	Work up Chemical	Mass (g)	Workup Solvent	Volume (mL)	Density (g mL-1)	Mass (g)
Reactant B		4-Chlorobenzoic acid	3.60111	156.57	1	0.023	DCPEAC	0.572907	PhSiH3	108.21	2.73771	THF	28.75	0.889	25.5587						0
		Benzyl alcohol	2.98466	108.14	1.2	0.0276	Phosphine	0.414437													0
							Fe(Pc)	1.30725
		Total	6.58577	264.71		0.0506		2.2946			2.73771				25.5587		0				0
										Yield (%)	90
										AE (%)	93.1926						mass (g)	MW	mol
										RME (%)	77.5381					Product	5.10648	246.69	0.0207
										MI total (g g-1)	7.28032
										MI RRC (g g-1)	2.27516
										MI Solvents (g g-1)	5.00516
		METRICS
		Reactant (Limiting Reactant First)	Mass (g)	MW (g mmol-1)	equiv	Mol	Catalyst	Mass (g)	Reagent	MW (g mmol-1)	Mass (g)	Reaction Solvent	Volume (mL)	Density (g.mL-1)	Mass (g)	Work up Chemical	Mass (g)	Workup Solvent	Volume (mL)	Density (g mL-1)	Mass (g)
Reactant C		3,5-Nitrobenzoic acid	4.87991	212.17	1	0.023	DCPEAC	0.572907	PhSiH3	108.21	2.73771	THF	28.75	0.889	25.5587						0
		Benzyl alcohol	2.98466	108.14	1.2	0.0276	Phosphine	0.414437													0
							Fe(Pc)	1.30725
		Total	7.86457	320.31		0.0506		2.2946			2.73771				25.5587		0				0
										Yield (%)	90
										AE (%)	94.3586						mass (g)	MW	mol
										RME (%)	79.5513					Product	6.25637	302.24	0.0207
										MI total (g g-1)	6.14664
										MI RRC (g g-1)	2.0614
										MI Solvents (g g-1)	4.08524
		METRICS
		Reactant (Limiting Reactant First)	Mass (g)	MW (g mmol-1)	equiv	Mol	Catalyst	Mass (g)	Reagent	MW (g mmol-1)	Mass (g)	Reaction Solvent	Volume (mL)	Density (g.mL-1)	Mass (g)	Work up Chemical	Mass (g)	Workup Solvent	Volume (mL)	Density (g mL-1)	Mass (g)
Reactant D		(2E)-3-[2-chloro-4-(cyclopentyloxy)-5-methoxyphenyl]acrylic acid	7.14771	310.77	1	0.023	DCPEAC	0.572907	PhSiH3	108.21	2.73771	THF	28.75	0.889	25.5587						0
		Benzyl alcohol	2.98466	108.14	1.2	0.0276	Phosphine	0.414437													0
							Fe(Pc)	1.30725
		Total	10.1324	418.91		0.0506		2.2946			2.73771				25.5587		0				0
										Yield (%)	90
										AE (%)	95.7007						mass (g)	MW	mol
										RME (%)	81.9021					Product	8.29863	400.9	0.0207
										MI total (g g-1)	4.90725
										MI RRC (g g-1)	1.82737
										MI Solvents (g g-1)	3.07988
		METRICS
		Reactant (Limiting Reactant First)	Mass (g)	MW (g mmol-1)	equiv	Mol	Catalyst	Mass (g)	Reagent	MW (g mmol-1)	Mass (g)	Reaction Solvent	Volume (mL)	Density (g.mL-1)	Mass (g)	Work up Chemical	Mass (g)	Workup Solvent	Volume (mL)	Density (g mL-1)	Mass (g)
Reactant E		Fmoc-D-Dab(Boc)-OH	10.1315	440.5	1	0.023	DCPEAC	0.572907	PhSiH3	108.21	2.73771	THF	28.75	0.889	25.5587						0
		Benzyl alcohol	2.98466	108.14	1.2	0.0276	Phosphine	0.414437													0
							Fe(Pc)	1.30725
		Total	13.1162	548.64		0.0506		2.29459			2.73771				25.5587		0				0
										Yield (%)	90
										AE (%)	96.7155						mass (g)	MW	mol
										RME (%)	83.7427					Product	10.9838	530.62	0.0207
										MI total (g g-1)	3.97923
										MI RRC (g g-1)	1.65229
										MI Solvents (g g-1)	2.32694
			Entry	Substrate	AE	RME	PMI	PMIRRC	PMIsolv
					(%)	(%)	(g g-1)	(g g-1)	(g g-1)
			Literature results		94.0974	46.5424	32.8674	3.3582	29.5092
			Literature modified to simulation paramaters		94.0974	77.6583	10.7306	2.13431	8.59625
			Simulation 1: Phosphine 0.1 eq, DCPEAC 0.1 eq, Fe(Pc) 0.1 eq, PhSih3 1.1 eq, Conc 0.4 M, yield of 90%
			1	A	92.1784	75.8373	14.0986	2.46399	11.6346
			2	B	93.1926	77.5381	12.2855	2.27516	10.0103
			3	C	94.3586	79.5513	10.2319	2.0614	8.17048
			4	D	95.7007	81.9021	7.98712	1.82737	6.15975
			5	E	96.7155	83.7427	6.30617	1.65229	4.65388
			Simulation 2: DCPEAC 0.1 eq, Phosphine 0.1 eq, Fe(Pc) 0.1 eq, PhSi 1.1 eq, Conc 0.4 M, yield of 80%
			1	A	92.1784	67.4109	15.8609	2.77199	13.0889
			2	B	93.1926	68.9227	13.8212	2.55956	11.2616
			3	C	94.3586	70.7122	11.5109	2.31908	9.19178
			4	D	95.7007	72.8019	8.98551	2.05579	6.92972
			5	E	96.7155	74.438	7.09445	1.85883	5.23562
			Simulation 3: DCPEAC 0.1 eq, Phosphine 0.1 eq, Fe(Pc) 0.1 eq, PhSi 1.1 eq, Conc 0.4 M, yield of 70%
			1	A	92.1784	58.9845	18.1268	3.16799	14.9588
			2	B	93.1926	60.3074	15.7956	2.92521	12.8704
			3	C	94.3586	61.8732	13.1553	2.65037	10.5049
			4	D	95.7007	63.7017	10.2692	2.34948	7.91968
			5	E	96.7155	65.1332	8.10794	2.12437	5.98357
			Simulation 4: DDCPEAC 0.1 eq, Phosphine 0.1 eq, Fe(Pc) 0.1 eq, PhSi 1.1 eq, Conc 0.4 M, yield of 50%
			1	A	92.1784	42.1318	25.3775	4.43518	20.9423
			2	B	93.1926	43.0767	22.1139	4.09529	18.0186
			3	C	94.3586	44.1951	18.4174	3.71052	14.7069
			4	D	95.7007	45.5012	14.3768	3.28927	11.0876
			5	E	96.7155	46.5237	11.3511	2.97412	8.37699
			Simulation 5: DCPEAC 0.1 eq, Phosphine 0.1 eq, Fe(Pc) 0.1 eq, PhSi 1.1 eq, Scale x5, Conc 0.4 M, yield of 90%
			1	A	92.1784	75.8373	14.0935	2.46399	11.6295
			2	B	93.1926	77.5381	12.2886	2.27516	10.0134
			3	C	94.3586	79.5513	10.2317	2.0614	8.17032
			4	D	95.7007	81.9021	7.98712	1.82737	6.15975
			5	E	96.7155	83.7427	6.30617	1.65229	4.65388
			Simulation 6: DCPEAC 0.1 eq, Phosphine 0.1 eq, Fe(Pc) 0.1 eq, PhSi 1.1 eq, Conc 0.8 M, yield of 90%
			1	A	92.1784	75.8373	8.28129	2.46399	5.8173
			2	B	93.1926	77.5381	7.28032	2.27516	5.00516
			3	C	94.3586	79.5513	6.14664	2.0614	4.08524
			4	D	95.7007	81.9021	4.90725	1.82737	3.07988
			5	E	96.7155	83.7427	3.97923	1.65229	2.32694
