# Supplementary material for: Why we might be misusing process mass intensity (PMI) and a methodology to apply it effectively as a discovery level metric
Source: Royal Society of Chemistry journal article supplement (doi:10.1039/c9gc01537j), 2019-11-07
Supplement: c9gc01537j3.pdf [file c9gc01537j3.pdf]

## SUPPORTING INFORMATION

### **Why we might be misusing Process Mass Intensity (PMI) and a methodology to apply it effectively as a discovery level metric**

Edward R. Monteith,<sup>a‡</sup> Pieter Mampuys,<sup>b‡</sup> Louise Summerton,<sup>a</sup> James H. Clark,<sup>b</sup> Bert U.W. Maes<sup>a\*</sup> and C. Robert McElroy<sup>a\*</sup>

<sup>a</sup> Green Chemistry Centre of Excellence, Department of Chemistry, University of York, Heslington, York, YO10 5DD, UK.

<sup>b</sup> Department of Chemistry, University of Antwerp, Groenenborgerlaan 171, B-2020 Antwerp, Belgium

<sup>‡</sup> These authors contributed equally.

#### **Corresponding Authors:**

\*E-mail: [rob.mcelroy@york.ac.uk](mailto:rob.mcelroy@york.ac.uk)

\*E-mail: [bert.maes@uantwerpen.be](mailto:bert.maes@uantwerpen.be)

## Table of Contents

|                                                                                                       |           |
|-------------------------------------------------------------------------------------------------------|-----------|
| <b>Table of Contents.....</b>                                                                         | <b>2</b>  |
| <b>1 Experimental for the synthesis of (oxolan-2-yl)(piperazin-1-yl)methanone (3).....</b>            | <b>3</b>  |
| 1.1 Silica as coupling agent.....                                                                     | 3         |
| 1.2 Immobilized novoenzyme 435 as coupling agent.....                                                 | 3         |
| 1.3 Thionyl chloride as coupling agent.....                                                           | 3         |
| 1.4 Boric acid as coupling agent .....                                                                | 3         |
| 1.5 Triphenylphosphine and <i>N</i> -bromosuccinimide as coupling agent.....                          | 3         |
| 1.6 Hexamethylsilazane as coupling agent.....                                                         | 4         |
| 1.7 Characterization of (oxolan-2-yl)(piperazin-1-yl)methanone (3).....                               | 4         |
| <b>2 Amide synthesis.....</b>                                                                         | <b>6</b>  |
| 2.1 Oxalyl chloride (COCl) <sub>2</sub> as coupling reagent.....                                      | 7         |
| 2.2 <i>N,N</i> -carbonyldiimidazole (CDI) as coupling reagent .....                                   | 9         |
| 2.3 <i>N,N'</i> -dicyclohexylcarbodiimide (DCC) as coupling reagent.....                              | 11        |
| 2.4 1-Ethyl-3-(3-dimethylaminopropyl)carbodiimide (EDC) as coupling reagent .....                     | 13        |
| 2.5 Pivaloyl chloride (PivCl) as coupling reagent.....                                                | 14        |
| 2.6 Isobutyl chloroformate (IBCF) as coupling reagent.....                                            | 16        |
| 2.7 Propylphosphonic anhydride (T <sub>3</sub> P) as coupling reagent .....                           | 17        |
| <b>3 Mitsunobu reaction .....</b>                                                                     | <b>18</b> |
| 3.1 Diethyl azodicarboxylate (DEAD) as coupling reagent.....                                          | 18        |
| 3.2 Ethyl 2-(3,4-dichlorophenyl)diazene-1-carboxylate as coupling reagent.....                        | 19        |
| 3.3 Ethyl 2-(3,4-dibromophenyl)diazene-1-carboxylate as coupling reagent .....                        | 20        |
| 3.4 Altering the acid concentration with DEAD as coupling partner .....                               | 21        |
| 3.5 Catalytic Mitsunobu reaction .....                                                                | 23        |
| 3.5.1 Catalytic in the azo coupling reagent with di(acetoxy)iodobenzene as oxidant .....              | 25        |
| 3.5.2 Catalytic in the azo coupling reagent with iron phthalocyanine and oxygen for reoxidation ..... | 26        |
| 3.5.3 Catalytic in phosphine.....                                                                     | 27        |
| 3.5.4 “Fully catalytic” Mitsunobu reaction .....                                                      | 28        |
| <b>4 References.....</b>                                                                              | <b>29</b> |

## 1 Experimental for the synthesis of (oxolan-2-yl)(piperazin-1-yl)methanone (3)

The green credentials obtained via the Chem21 Metrics Toolkit of a reaction between piperazine (1) and tetrahydrofuran-2-carboxylic acid (2) via six different amide coupling reagents can be found in table 2 of the manuscript. Underneath the experimental procedures for the synthesis of (oxolan-2-yl)(piperazin-1-yl)methanone (3) are provided. The characterisation of molecule 3 can be found in section 1.7.

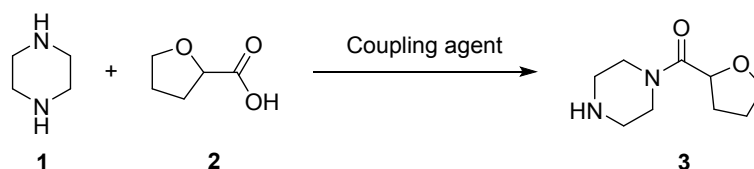

### 1.1 Silica as coupling agent

Tetrahydrofuran-2-carboxylic acid (5.0 mmol, 0.58 g, 1.0 equiv), piperazine (5.0 mmol, 0.43 g, 1.0 equiv) and K60 silica (0.1 g, activated at 700 °C) were heated at 110 °C. After 14 hours the mixture was cooled to room temperature and dissolved in acetone (20 mL). The silica catalyst was removed by filtration and solvent removed under reduced pressure. The crude material was purified by flash chromatography.

### 1.2 Immobilized novoenzyme 435 as coupling agent

To a solution of tetrahydrofuran-2-carboxylic acid (5.0 mmol, 0.58 g, 1.0 equiv) and piperazine (5.0 mmol, 0.43 g, 1.0 equiv) in heptane (20 mL) was added immobilized novoenzyme 435 (0.10 g) and the mixture stirred at room temperature. After 72 hours the solution was filtered and solvent removed under reduced pressure. The crude material was purified by flash chromatography.

### 1.3 Thionyl chloride as coupling agent

To a solution of tetrahydrofuran-2-carboxylic acid (5.0 mmol, 0.58 g, 1.0 equiv) and piperazine (5.0 mmol, 0.43 g, 1.0 equiv) in toluene (20 mL) was added thionyl chloride (15 mmol, 1.78 g, 1.5 equiv) and the mixture was refluxed. After 1 hour the mixture was cooled to room temperature and water (5 mL) added then the solvent removed under reduced pressure. The crude material was purified by flash chromatography.

### 1.4 Boric acid as coupling agent

To a solution of tetrahydrofuran-2-carboxylic acid (5.0 mmol, 0.58 g, 1.0 equiv) in toluene (20 mL) was added boric acid (0.5 mmol, 0.03 g, 10 mol%). To this mixture was added piperazine (5.0 mmol, 0.43 g, 1.0 equiv) and the mixture was refluxed. After 11 hours the mixture was cooled and solvent removed under reduced pressure. The crude material was purified by flash chromatography.

### 1.5 Triphenylphosphine and *N*-bromosuccinimide as coupling agent

A mixture of tetrahydrofuran-2-carboxylic acid (5.0 mmol, 0.58 g, 1.0 equiv) and triphenylphosphine (5.0 mmol, 1.31 g, 1.0 equiv) in dichloromethane (15 mL) was cooled to

5 °C. *N*-Bromosuccinimide (5.0 mmol, 0.89 g, 1.0 equiv) was added and the reaction mixture stirred for 15 min. Then a solution of piperazine (5.0 mmol, 0.43 g, 1.0 equiv) and pyridine (5.0 mmol, 0.40 g, 1.0 equiv) in dichloromethane (5 mL) was added dropwise to the above solution at room temperature. After 1 hour the solvent was removed under reduced pressure. The crude was dissolved in ethyl acetate (50 mL) and washed with saturated sodium bicarbonate solution (30 mL), water (30 mL) and brine (20 mL). The organic layer was dried over anhydrous magnesium sulphate, filtered and solvent removed under reduced pressure. The crude material was purified by flash chromatography.

## 1.6 Hexamethylsilazane as coupling agent

Tetrahydrofuran-2-carboxylic acid (5.0 mmol, 0.58 g, 1.0 equiv), piperazine (5.0 mmol, 0.43 g) and 1,1,1,3,3,3-hexamethyldisilazane (5.0 mmol, 0.81 g, 1.0 equiv) was heated at 110 °C. After 8 hours the mixture was cooled to room temperature and dissolved in ethyl acetate (50 mL) and washed with saturated sodium bicarbonate solution (30 mL), water (30 mL) and brine (20 mL). The organic layer was dried over anhydrous magnesium sulphate, filtered and solvent removed under reduced pressure. The crude material was purified by flash chromatography.

## 1.7 Characterization of (oxolan-2-yl)(piperazin-1-yl)methanone (3).

The compound was purified using EtOAc:MeOH:Et<sub>3</sub>N (5:1:0.5, with *R<sub>f</sub>* (3) = 0.26) as eluent system. All spectra are in agreement with the literature.<sup>1</sup>

**<sup>1</sup>H NMR (400 MHz, CDCl<sub>3</sub>):** δ 4.49 (t, *J* = 6.9 Hz, 1H), 3.83 (q, *J* = 7.8, 7.3 Hz, 1H), 3.73 (q, *J* = 7.8, 7.0 Hz, 1H), 3.58 – 3.46 (m, 2H), 3.46 – 3.34 (m, 2H), 2.79 – 2.69 (m, 4H), 2.20 – 2.08 (m, 1H), 1.94 – 1.87 (m, 2H), 1.83 – 1.73 (m, 1H) ppm.

**<sup>13</sup>C NMR (101 MHz, CDCl<sub>3</sub>):** δ 169.8, 75.6, 68.9, 46.6, 46.2, 45.8, 43.0, 28.4, 25.6 ppm.

**HRMS ESI** (*m/z*): calculated for C<sub>9</sub>H<sub>17</sub>N<sub>2</sub>O<sub>2</sub> [*M* + *H*]<sup>+</sup>, 185.1285; found, 185.1285.

(*m/z*): calculated for C<sub>9</sub>H<sub>16</sub>N<sub>2</sub>NaO<sub>2</sub> [*M* + Na]<sup>+</sup>, 207.1104; found, 207.1103.

*General information:* All reagents were purchased from commercial sources and were used without further purification. Nuclear Magnetic Resonance (NMR) spectra were recorded on a JEOL ECX400 spectrometer at 295 K. <sup>1</sup>H NMR experiments were reported in δ units, parts per million (ppm), and were measured relative to residual chloroform (7.26 ppm) in the deuterated solvent. <sup>13</sup>C NMR spectra were reported in ppm relative to CDCl<sub>3</sub> (77.16 ppm) and the spectra were obtained with <sup>1</sup>H decoupling. All coupling constants *J* were reported in Hertz (Hz). The following abbreviations were used to describe peak splitting patterns when appropriate: s = singlet, d = doublet, t = triplet, q = quadruplet m = multiplet. All measurements were carried out at room temperature unless otherwise stated. High resolution mass-spectra were obtained by the University of York Mass Spectrometry Service, using electrospray ionisation (ESI) in positive mode on a Bruker Daltonics, Micro-tof spectrometer. Thin layer chromatography was carried out on Merck silica gel 60F<sub>254</sub> pre-coated aluminium foil sheets and were visualised using UV light (254 nm) or stained with a 10% solution of phosphomolybdic acid in ethanol. Flash column chromatography was carried out using slurry packed Fluka silica gel (SiO<sub>2</sub>), 35–70 μm, 60 Å, under a positive pressure of air, eluting with the specified solvent system.

$^1\text{H}$  NMR (400 MHz,  $\text{CDCl}_3$ ):

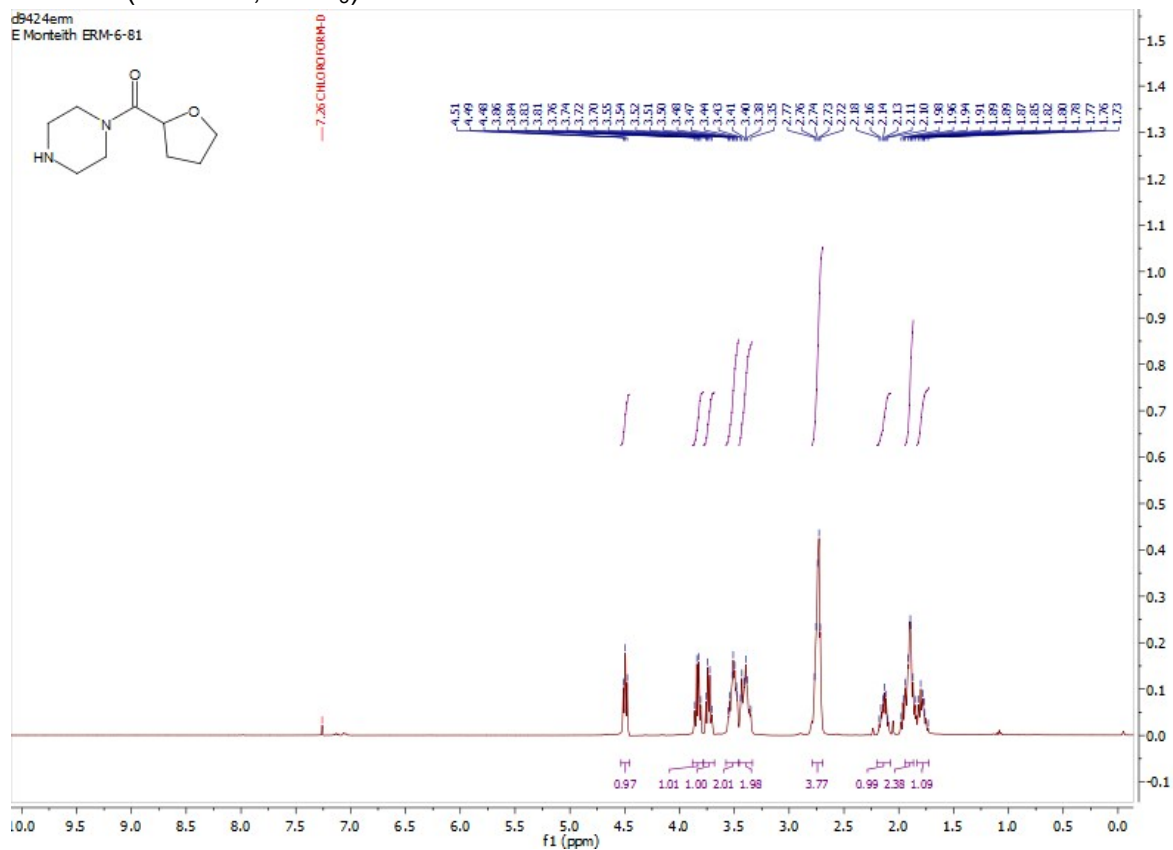

$^{13}\text{C}$  NMR (101 MHz,  $\text{CDCl}_3$ ):

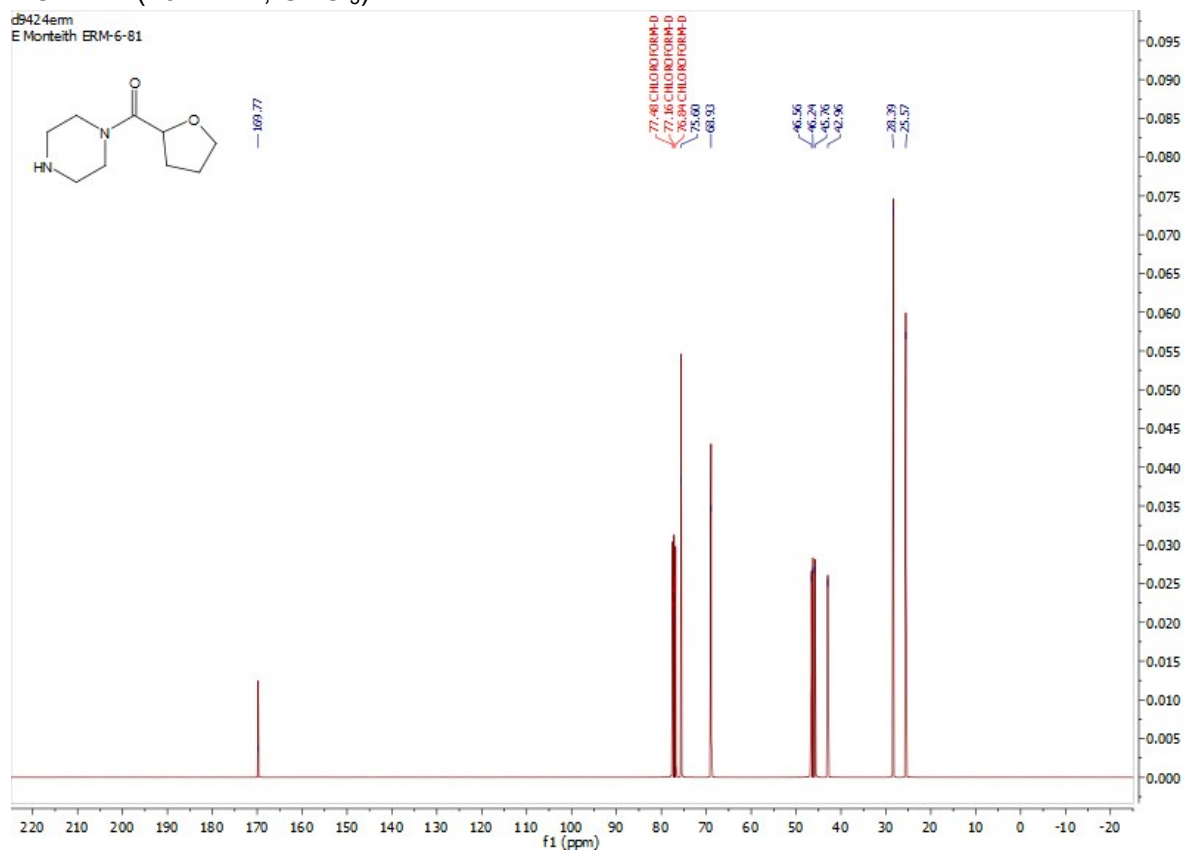

## 2 Amide synthesis

Amide bond formations is one of the most important reactions in organic synthesis. In this section we examined for several classical coupling reagents the effect of altering the reaction parameters on the green metrics parameters yield, atom economy (AE), reaction mass efficiency (RME), process mass intensity (PMI), process mass intensity reactants reagents and catalysts ( $\text{PMI}_{\text{RRC}}$ ), process mass intensity solvents ( $\text{PMI}_{\text{solv}}$ ).

In the following tables a green metric assessment of the reported literature procedures is determined as a benchmark. For every literature procedure also the molecular weight of the reactants and the acid concentration have been indicated. Subsequently, in simulations A-D the following parameters have been altered.

- Simulation A:
  - The acid concentration is changed to 0.4 M.
  - The equivalents of the reagents and reactants remain unaltered as well as the reported yield.
- Simulation B:
  - The acid concentration remains the same as reported.
  - The yield of the reaction is changed to 90%.
- Simulation C:
  - The acid concentration is changed to 0.4 M.
  - The yield of the reaction is changed to 90%.
- Simulation D:
  - The acid concentration is changed to 0.4 M.
  - The yield of the reaction is changed to 50%.

## 2.1 Oxalyl chloride (COCl)<sub>2</sub> as coupling reagent

**Table S1.** Literature and simulation A-D for oxalyl chloride<sup>a</sup>

|                                                   |                                                                                    |        |         |                          |                                         |                                          |           |
|---------------------------------------------------|------------------------------------------------------------------------------------|--------|---------|--------------------------|-----------------------------------------|------------------------------------------|-----------|
| Reaction 3                                        | 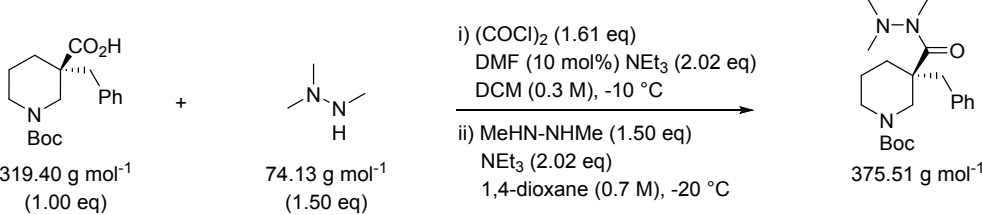 |        |         |                          |                                         |                                          |           |
| Reaction 4                                        |  |        |         |                          |                                         |                                          |           |
|                                                   |                                                                                    | AE (%) | RME (%) | PMI (g g <sup>-1</sup> ) | PMI <sub>RRC</sub> (g g <sup>-1</sup> ) | PMI <sub>solv</sub> (g g <sup>-1</sup> ) | Yield (%) |
| Literature data reported                          |                                                                                    |        |         |                          |                                         |                                          |           |
| Reaction 3: [Acid] = 0.2 M                        | 95                                                                                 | 79     | 20.3    | 3.2                      | 17.1                                    | 91                                       |           |
| Reaction 4: [Acid] = 0.3 M                        | 96                                                                                 | 70     | 15.0    | 4.4                      | 10.5                                    | 74                                       |           |
| Simulation A: [Acid] = 0.4 M, Literature yield    |                                                                                    |        |         |                          |                                         |                                          |           |
| Reaction 3                                        | 95                                                                                 | 79     | 12.2    | 3.2                      | 9.0                                     | 91                                       |           |
| Reaction 4                                        | 96                                                                                 | 70     | 11.6    | 4.4                      | 7.2                                     | 74                                       |           |
| Simulation B: [Acid] = Literature data, 90% Yield |                                                                                    |        |         |                          |                                         |                                          |           |
| Reaction 3                                        | 95                                                                                 | 78     | 20.4    | 3.2                      | 17.2                                    | 90                                       |           |
| Reaction 4                                        | 96                                                                                 | 85     | 12.3    | 3.7                      | 8.7                                     | 90                                       |           |
| Simulation C: [Acid] = 0.4 M, 90% Yield           |                                                                                    |        |         |                          |                                         |                                          |           |
| Reaction 3                                        | 95                                                                                 | 78     | 12.3    | 3.2                      | 9.1                                     | 90                                       |           |
| Reaction 4                                        | 96                                                                                 | 85     | 9.5     | 3.7                      | 5.9                                     | 90                                       |           |
| Simulation D: [Acid] = 0.4 M, 50% Yield           |                                                                                    |        |         |                          |                                         |                                          |           |
| Reaction 3                                        | 95                                                                                 | 44     | 22.1    | 5.7                      | 16.4                                    | 50                                       |           |
| Reaction 4                                        | 96                                                                                 | 47     | 17.2    | 6.6                      | 10.6                                    | 50                                       |           |

<sup>a</sup> Reactions refer to scheme 1 of the manuscript.

### Reported Experimental procedures

#### Reaction 3:<sup>2</sup>

To a 72 L unjacketed reactor equipped with a temperature probe, reflux condenser, nitrogen sweep, cooling bath, and an overhead stirrer was charged *N*-Boc-3-benzylpiperidine-2-carboxylic acid (3 kg, 9.4 mol) followed by dichloromethane (30 L). The solution was cooled to -15 °C, and oxalyl chloride (1.3 L, 15.2 mol) was added over 15 min while the internal temperature was maintained below -10 °C. DMF (300 mL) was then charged to the mixture over 20 min followed by NEt<sub>3</sub> (2.7 L, 19 mol) over 1.75 h. The reaction mixture was stirred at -15 to -10 °C for 4.25 h until the conversion was complete. A solution of trimethylhydrazine in 1,4-dioxane (1.05 kg in 15 kg, 7% w/w, 14.1 mol) and NEt<sub>3</sub> (2.7 L, 19 mol) was added to the reaction mixture over 2 h using a fluid-metering pump, maintaining the internal temperature between -15 to -20 °C. The reaction

progress was monitored by HPLC analysis. The product was obtained as an oil (3.2 kg, 90% yield).

Reaction 4:<sup>3</sup>

At 20-25 °C, a reactor was charged with THF (100 L) followed by chiral acid (23.10 kg, 55.59 mol) which was rinsed into the reactor with THF (5 L). DMF (0.275 kg, 3.76 mol) was charged to the reactor followed by the addition of oxalyl chloride (9.125 kg, 71.89 mol) over 0.25 h, maintaining the temperature below 30 °C. The resulting mixture was held for 1.0 h, and a sample was quenched into MeOH for HPLC analysis, which indicated >99% conversion to the acid chloride via analysis of the methyl ester derivative. THF (116 L) was charged to a second reactor followed by 2-aminopyrazine (7.15 kg, 75.23 mol), which was rinsed into the reactor with THF (6 L). Pyridine (54 kg, 682.7 mol) was charged to the second reactor, and the temperature was maintained at 20-25 °C. The acid chloride mixture was transferred to the mixture of 10 in THF over 0.75 h while maintaining the temperature below 30 °C. THF (24 L) was used to rinse the acid chloride reactor into the second reactor. The resulting mixture was held for 1.0 h, and a sample was quenched into MeOH for HPLC analysis, which indicated <1% of the methyl ester derivative and production of (R)-1. The chiral amide was isolated as an off white solid with a weight of 21.06 kg and chiral purity of >99% ee (yield 73.6%).





Reaction 6:<sup>5</sup>

A solution of *N*-*t*-Boc-glycine (81.2 kg, 464 mol) at 25 °C in ethyl acetate (428 L) in reactor 1 was transferred to a slurry of CDI (75.2 kg, 464 mol) at 25 °C in ethyl acetate (325 L) in reactor 2. Reactor 1 was rinsed with ethyl acetate (50 L), and the rinse was transferred to reactor 2. The clear yellow solution was stirred for 21 h at 25 °C. A solution of amine (221.6 kg, 410.3 mol) in NMP (239 L) was prepared in reactor 1 at 25 °C. The solution of the amine in reactor 2 was transferred to the solution of 2 in reactor 1 over 19 min. Reactor 2 was rinsed with ethyl acetate (50 L), and the rinse was transferred to reactor 1. The product was obtained in 87% yield (170.6 kg).

## 2.3 *N,N'*-dicyclohexylcarbodiimide (DCC) as coupling reagent

**Table S3.** Literature and simulation A-D for DCC<sup>a</sup>

| Reaction 7                                          | 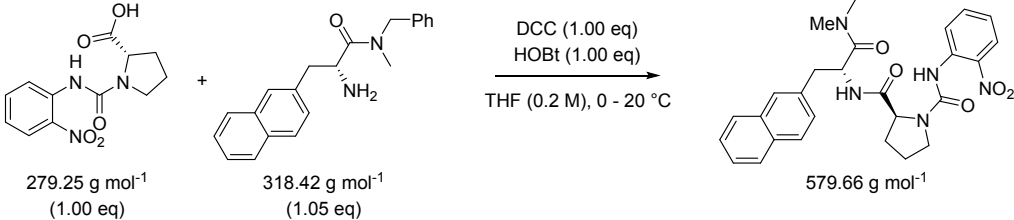                                                                                                                                                                                                                                                                                                                                                                                                                                                                                                                                                                                                                                                                                                                                                                                                                                                                                                                                                                                                                                                                                                                                                                                                                                                                                                                                                                                                                                                                                                                                                                                                                                                                                                                                                                                           |            |                             |                                            |                                             |                                            |                                             |              |                          |  |  |  |  |  |  |                            |    |    |      |     |      |    |                            |    |    |     |     |     |    |                                                |  |  |  |  |  |  |            |    |    |     |     |     |    |            |    |    |      |     |      |    |                                                     |  |  |  |  |  |  |            |    |    |      |     |      |    |            |    |    |     |     |     |    |                                           |  |  |  |  |  |  |            |    |    |     |     |     |    |            |    |    |      |     |      |    |                                           |  |  |  |  |  |  |            |    |    |      |     |     |    |            |    |    |      |     |      |    |
|-----------------------------------------------------|------------------------------------------------------------------------------------------------------------------------------------------------------------------------------------------------------------------------------------------------------------------------------------------------------------------------------------------------------------------------------------------------------------------------------------------------------------------------------------------------------------------------------------------------------------------------------------------------------------------------------------------------------------------------------------------------------------------------------------------------------------------------------------------------------------------------------------------------------------------------------------------------------------------------------------------------------------------------------------------------------------------------------------------------------------------------------------------------------------------------------------------------------------------------------------------------------------------------------------------------------------------------------------------------------------------------------------------------------------------------------------------------------------------------------------------------------------------------------------------------------------------------------------------------------------------------------------------------------------------------------------------------------------------------------------------------------------------------------------------------------------------------------------------------------------------------------------------------------------------------------|------------|-----------------------------|--------------------------------------------|---------------------------------------------|--------------------------------------------|---------------------------------------------|--------------|--------------------------|--|--|--|--|--|--|----------------------------|----|----|------|-----|------|----|----------------------------|----|----|-----|-----|-----|----|------------------------------------------------|--|--|--|--|--|--|------------|----|----|-----|-----|-----|----|------------|----|----|------|-----|------|----|-----------------------------------------------------|--|--|--|--|--|--|------------|----|----|------|-----|------|----|------------|----|----|-----|-----|-----|----|-------------------------------------------|--|--|--|--|--|--|------------|----|----|-----|-----|-----|----|------------|----|----|------|-----|------|----|-------------------------------------------|--|--|--|--|--|--|------------|----|----|------|-----|-----|----|------------|----|----|------|-----|------|----|
|                                                     | 279.25 g mol <sup>-1</sup><br>(1.00 eq)      318.42 g mol <sup>-1</sup><br>(1.05 eq)      579.66 g mol <sup>-1</sup>                                                                                                                                                                                                                                                                                                                                                                                                                                                                                                                                                                                                                                                                                                                                                                                                                                                                                                                                                                                                                                                                                                                                                                                                                                                                                                                                                                                                                                                                                                                                                                                                                                                                                                                                                         |            |                             |                                            |                                             |                                            |                                             |              |                          |  |  |  |  |  |  |                            |    |    |      |     |      |    |                            |    |    |     |     |     |    |                                                |  |  |  |  |  |  |            |    |    |     |     |     |    |            |    |    |      |     |      |    |                                                     |  |  |  |  |  |  |            |    |    |      |     |      |    |            |    |    |     |     |     |    |                                           |  |  |  |  |  |  |            |    |    |     |     |     |    |            |    |    |      |     |      |    |                                           |  |  |  |  |  |  |            |    |    |      |     |     |    |            |    |    |      |     |      |    |
| Reaction 8                                          |                                                                                                                                                                                                                                                                                                                                                                                                                                                                                                                                                                                                                                                                                                                                                                                                                                                                                                                                                                                                                                                                                                                                                                                                                                                                                                                                                                                                                                                                                                                                                                                                                                                                                                                                                                                            |            |                             |                                            |                                             |                                            |                                             |              |                          |  |  |  |  |  |  |                            |    |    |      |     |      |    |                            |    |    |     |     |     |    |                                                |  |  |  |  |  |  |            |    |    |     |     |     |    |            |    |    |      |     |      |    |                                                     |  |  |  |  |  |  |            |    |    |      |     |      |    |            |    |    |     |     |     |    |                                           |  |  |  |  |  |  |            |    |    |     |     |     |    |            |    |    |      |     |      |    |                                           |  |  |  |  |  |  |            |    |    |      |     |     |    |            |    |    |      |     |      |    |
|                                                     | 138.12 g mol <sup>-1</sup><br>(1.00 eq)      100.17 g mol <sup>-1</sup><br>(1.02 eq)      220.27 g mol <sup>-1</sup>                                                                                                                                                                                                                                                                                                                                                                                                                                                                                                                                                                                                                                                                                                                                                                                                                                                                                                                                                                                                                                                                                                                                                                                                                                                                                                                                                                                                                                                                                                                                                                                                                                                                                                                                                         |            |                             |                                            |                                             |                                            |                                             |              |                          |  |  |  |  |  |  |                            |    |    |      |     |      |    |                            |    |    |     |     |     |    |                                                |  |  |  |  |  |  |            |    |    |     |     |     |    |            |    |    |      |     |      |    |                                                     |  |  |  |  |  |  |            |    |    |      |     |      |    |            |    |    |     |     |     |    |                                           |  |  |  |  |  |  |            |    |    |     |     |     |    |            |    |    |      |     |      |    |                                           |  |  |  |  |  |  |            |    |    |      |     |     |    |            |    |    |      |     |      |    |
|                                                     | <table><tr><th></th><th>AE<br/>(%)</th><th>RME<br/>(%)</th><th>PMI<br/>(g g<sup>-1</sup>)</th><th>PMI<sub>RRC</sub><br/>(g g<sup>-1</sup>)</th><th>PMI<sub>solv</sub><br/>(g g<sup>-1</sup>)</th><th>Yield<br/>(%)</th></tr><tr><td>Literature data reported</td><td></td><td></td><td></td><td></td><td></td><td></td></tr><tr><td>Reaction 7: [Acid] = 0.2 M</td><td>97</td><td>77</td><td>14.1</td><td>2.1</td><td>12.0</td><td>77</td></tr><tr><td>Reaction 8: [Acid] = 0.8 M</td><td>92</td><td>79</td><td>8.1</td><td>2.4</td><td>5.7</td><td>86</td></tr><tr><td>Simulation A: [Acid] = 0.4 M, Literature yield</td><td></td><td></td><td></td><td></td><td></td><td></td></tr><tr><td>Reaction 7</td><td>97</td><td>77</td><td>6.7</td><td>2.1</td><td>4.5</td><td>77</td></tr><tr><td>Reaction 8</td><td>92</td><td>79</td><td>14.2</td><td>2.4</td><td>11.8</td><td>86</td></tr><tr><td>Simulation B: [Acid] = Literature data, Yield = 90%</td><td></td><td></td><td></td><td></td><td></td><td></td></tr><tr><td>Reaction 7</td><td>97</td><td>90</td><td>12.1</td><td>1.8</td><td>10.3</td><td>90</td></tr><tr><td>Reaction 8</td><td>92</td><td>83</td><td>7.7</td><td>2.3</td><td>5.4</td><td>90</td></tr><tr><td>Simulation C: [Acid] = 0.4 M, Yield = 90%</td><td></td><td></td><td></td><td></td><td></td><td></td></tr><tr><td>Reaction 7</td><td>97</td><td>80</td><td>6.4</td><td>2.0</td><td>4.3</td><td>90</td></tr><tr><td>Reaction 8</td><td>92</td><td>83</td><td>13.6</td><td>2.3</td><td>11.3</td><td>90</td></tr><tr><td>Simulation D: [Acid] = 0.4 M, Yield = 50%</td><td></td><td></td><td></td><td></td><td></td><td></td></tr><tr><td>Reaction 7</td><td>97</td><td>50</td><td>10.3</td><td>3.3</td><td>7.0</td><td>50</td></tr><tr><td>Reaction 8</td><td>92</td><td>46</td><td>24.5</td><td>4.1</td><td>20.3</td><td>50</td></tr></table> |            | AE<br>(%)                   | RME<br>(%)                                 | PMI<br>(g g <sup>-1</sup> )                 | PMI <sub>RRC</sub><br>(g g <sup>-1</sup> ) | PMI <sub>solv</sub><br>(g g <sup>-1</sup> ) | Yield<br>(%) | Literature data reported |  |  |  |  |  |  | Reaction 7: [Acid] = 0.2 M | 97 | 77 | 14.1 | 2.1 | 12.0 | 77 | Reaction 8: [Acid] = 0.8 M | 92 | 79 | 8.1 | 2.4 | 5.7 | 86 | Simulation A: [Acid] = 0.4 M, Literature yield |  |  |  |  |  |  | Reaction 7 | 97 | 77 | 6.7 | 2.1 | 4.5 | 77 | Reaction 8 | 92 | 79 | 14.2 | 2.4 | 11.8 | 86 | Simulation B: [Acid] = Literature data, Yield = 90% |  |  |  |  |  |  | Reaction 7 | 97 | 90 | 12.1 | 1.8 | 10.3 | 90 | Reaction 8 | 92 | 83 | 7.7 | 2.3 | 5.4 | 90 | Simulation C: [Acid] = 0.4 M, Yield = 90% |  |  |  |  |  |  | Reaction 7 | 97 | 80 | 6.4 | 2.0 | 4.3 | 90 | Reaction 8 | 92 | 83 | 13.6 | 2.3 | 11.3 | 90 | Simulation D: [Acid] = 0.4 M, Yield = 50% |  |  |  |  |  |  | Reaction 7 | 97 | 50 | 10.3 | 3.3 | 7.0 | 50 | Reaction 8 | 92 | 46 | 24.5 | 4.1 | 20.3 | 50 |
|                                                     | AE<br>(%)                                                                                                                                                                                                                                                                                                                                                                                                                                                                                                                                                                                                                                                                                                                                                                                                                                                                                                                                                                                                                                                                                                                                                                                                                                                                                                                                                                                                                                                                                                                                                                                                                                                                                                                                                                                                                                                                    | RME<br>(%) | PMI<br>(g g <sup>-1</sup> ) | PMI <sub>RRC</sub><br>(g g <sup>-1</sup> ) | PMI <sub>solv</sub><br>(g g <sup>-1</sup> ) | Yield<br>(%)                               |                                             |              |                          |  |  |  |  |  |  |                            |    |    |      |     |      |    |                            |    |    |     |     |     |    |                                                |  |  |  |  |  |  |            |    |    |     |     |     |    |            |    |    |      |     |      |    |                                                     |  |  |  |  |  |  |            |    |    |      |     |      |    |            |    |    |     |     |     |    |                                           |  |  |  |  |  |  |            |    |    |     |     |     |    |            |    |    |      |     |      |    |                                           |  |  |  |  |  |  |            |    |    |      |     |     |    |            |    |    |      |     |      |    |
| Literature data reported                            |                                                                                                                                                                                                                                                                                                                                                                                                                                                                                                                                                                                                                                                                                                                                                                                                                                                                                                                                                                                                                                                                                                                                                                                                                                                                                                                                                                                                                                                                                                                                                                                                                                                                                                                                                                                                                                                                              |            |                             |                                            |                                             |                                            |                                             |              |                          |  |  |  |  |  |  |                            |    |    |      |     |      |    |                            |    |    |     |     |     |    |                                                |  |  |  |  |  |  |            |    |    |     |     |     |    |            |    |    |      |     |      |    |                                                     |  |  |  |  |  |  |            |    |    |      |     |      |    |            |    |    |     |     |     |    |                                           |  |  |  |  |  |  |            |    |    |     |     |     |    |            |    |    |      |     |      |    |                                           |  |  |  |  |  |  |            |    |    |      |     |     |    |            |    |    |      |     |      |    |
| Reaction 7: [Acid] = 0.2 M                          | 97                                                                                                                                                                                                                                                                                                                                                                                                                                                                                                                                                                                                                                                                                                                                                                                                                                                                                                                                                                                                                                                                                                                                                                                                                                                                                                                                                                                                                                                                                                                                                                                                                                                                                                                                                                                                                                                                           | 77         | 14.1                        | 2.1                                        | 12.0                                        | 77                                         |                                             |              |                          |  |  |  |  |  |  |                            |    |    |      |     |      |    |                            |    |    |     |     |     |    |                                                |  |  |  |  |  |  |            |    |    |     |     |     |    |            |    |    |      |     |      |    |                                                     |  |  |  |  |  |  |            |    |    |      |     |      |    |            |    |    |     |     |     |    |                                           |  |  |  |  |  |  |            |    |    |     |     |     |    |            |    |    |      |     |      |    |                                           |  |  |  |  |  |  |            |    |    |      |     |     |    |            |    |    |      |     |      |    |
| Reaction 8: [Acid] = 0.8 M                          | 92                                                                                                                                                                                                                                                                                                                                                                                                                                                                                                                                                                                                                                                                                                                                                                                                                                                                                                                                                                                                                                                                                                                                                                                                                                                                                                                                                                                                                                                                                                                                                                                                                                                                                                                                                                                                                                                                           | 79         | 8.1                         | 2.4                                        | 5.7                                         | 86                                         |                                             |              |                          |  |  |  |  |  |  |                            |    |    |      |     |      |    |                            |    |    |     |     |     |    |                                                |  |  |  |  |  |  |            |    |    |     |     |     |    |            |    |    |      |     |      |    |                                                     |  |  |  |  |  |  |            |    |    |      |     |      |    |            |    |    |     |     |     |    |                                           |  |  |  |  |  |  |            |    |    |     |     |     |    |            |    |    |      |     |      |    |                                           |  |  |  |  |  |  |            |    |    |      |     |     |    |            |    |    |      |     |      |    |
| Simulation A: [Acid] = 0.4 M, Literature yield      |                                                                                                                                                                                                                                                                                                                                                                                                                                                                                                                                                                                                                                                                                                                                                                                                                                                                                                                                                                                                                                                                                                                                                                                                                                                                                                                                                                                                                                                                                                                                                                                                                                                                                                                                                                                                                                                                              |            |                             |                                            |                                             |                                            |                                             |              |                          |  |  |  |  |  |  |                            |    |    |      |     |      |    |                            |    |    |     |     |     |    |                                                |  |  |  |  |  |  |            |    |    |     |     |     |    |            |    |    |      |     |      |    |                                                     |  |  |  |  |  |  |            |    |    |      |     |      |    |            |    |    |     |     |     |    |                                           |  |  |  |  |  |  |            |    |    |     |     |     |    |            |    |    |      |     |      |    |                                           |  |  |  |  |  |  |            |    |    |      |     |     |    |            |    |    |      |     |      |    |
| Reaction 7                                          | 97                                                                                                                                                                                                                                                                                                                                                                                                                                                                                                                                                                                                                                                                                                                                                                                                                                                                                                                                                                                                                                                                                                                                                                                                                                                                                                                                                                                                                                                                                                                                                                                                                                                                                                                                                                                                                                                                           | 77         | 6.7                         | 2.1                                        | 4.5                                         | 77                                         |                                             |              |                          |  |  |  |  |  |  |                            |    |    |      |     |      |    |                            |    |    |     |     |     |    |                                                |  |  |  |  |  |  |            |    |    |     |     |     |    |            |    |    |      |     |      |    |                                                     |  |  |  |  |  |  |            |    |    |      |     |      |    |            |    |    |     |     |     |    |                                           |  |  |  |  |  |  |            |    |    |     |     |     |    |            |    |    |      |     |      |    |                                           |  |  |  |  |  |  |            |    |    |      |     |     |    |            |    |    |      |     |      |    |
| Reaction 8                                          | 92                                                                                                                                                                                                                                                                                                                                                                                                                                                                                                                                                                                                                                                                                                                                                                                                                                                                                                                                                                                                                                                                                                                                                                                                                                                                                                                                                                                                                                                                                                                                                                                                                                                                                                                                                                                                                                                                           | 79         | 14.2                        | 2.4                                        | 11.8                                        | 86                                         |                                             |              |                          |  |  |  |  |  |  |                            |    |    |      |     |      |    |                            |    |    |     |     |     |    |                                                |  |  |  |  |  |  |            |    |    |     |     |     |    |            |    |    |      |     |      |    |                                                     |  |  |  |  |  |  |            |    |    |      |     |      |    |            |    |    |     |     |     |    |                                           |  |  |  |  |  |  |            |    |    |     |     |     |    |            |    |    |      |     |      |    |                                           |  |  |  |  |  |  |            |    |    |      |     |     |    |            |    |    |      |     |      |    |
| Simulation B: [Acid] = Literature data, Yield = 90% |                                                                                                                                                                                                                                                                                                                                                                                                                                                                                                                                                                                                                                                                                                                                                                                                                                                                                                                                                                                                                                                                                                                                                                                                                                                                                                                                                                                                                                                                                                                                                                                                                                                                                                                                                                                                                                                                              |            |                             |                                            |                                             |                                            |                                             |              |                          |  |  |  |  |  |  |                            |    |    |      |     |      |    |                            |    |    |     |     |     |    |                                                |  |  |  |  |  |  |            |    |    |     |     |     |    |            |    |    |      |     |      |    |                                                     |  |  |  |  |  |  |            |    |    |      |     |      |    |            |    |    |     |     |     |    |                                           |  |  |  |  |  |  |            |    |    |     |     |     |    |            |    |    |      |     |      |    |                                           |  |  |  |  |  |  |            |    |    |      |     |     |    |            |    |    |      |     |      |    |
| Reaction 7                                          | 97                                                                                                                                                                                                                                                                                                                                                                                                                                                                                                                                                                                                                                                                                                                                                                                                                                                                                                                                                                                                                                                                                                                                                                                                                                                                                                                                                                                                                                                                                                                                                                                                                                                                                                                                                                                                                                                                           | 90         | 12.1                        | 1.8                                        | 10.3                                        | 90                                         |                                             |              |                          |  |  |  |  |  |  |                            |    |    |      |     |      |    |                            |    |    |     |     |     |    |                                                |  |  |  |  |  |  |            |    |    |     |     |     |    |            |    |    |      |     |      |    |                                                     |  |  |  |  |  |  |            |    |    |      |     |      |    |            |    |    |     |     |     |    |                                           |  |  |  |  |  |  |            |    |    |     |     |     |    |            |    |    |      |     |      |    |                                           |  |  |  |  |  |  |            |    |    |      |     |     |    |            |    |    |      |     |      |    |
| Reaction 8                                          | 92                                                                                                                                                                                                                                                                                                                                                                                                                                                                                                                                                                                                                                                                                                                                                                                                                                                                                                                                                                                                                                                                                                                                                                                                                                                                                                                                                                                                                                                                                                                                                                                                                                                                                                                                                                                                                                                                           | 83         | 7.7                         | 2.3                                        | 5.4                                         | 90                                         |                                             |              |                          |  |  |  |  |  |  |                            |    |    |      |     |      |    |                            |    |    |     |     |     |    |                                                |  |  |  |  |  |  |            |    |    |     |     |     |    |            |    |    |      |     |      |    |                                                     |  |  |  |  |  |  |            |    |    |      |     |      |    |            |    |    |     |     |     |    |                                           |  |  |  |  |  |  |            |    |    |     |     |     |    |            |    |    |      |     |      |    |                                           |  |  |  |  |  |  |            |    |    |      |     |     |    |            |    |    |      |     |      |    |
| Simulation C: [Acid] = 0.4 M, Yield = 90%           |                                                                                                                                                                                                                                                                                                                                                                                                                                                                                                                                                                                                                                                                                                                                                                                                                                                                                                                                                                                                                                                                                                                                                                                                                                                                                                                                                                                                                                                                                                                                                                                                                                                                                                                                                                                                                                                                              |            |                             |                                            |                                             |                                            |                                             |              |                          |  |  |  |  |  |  |                            |    |    |      |     |      |    |                            |    |    |     |     |     |    |                                                |  |  |  |  |  |  |            |    |    |     |     |     |    |            |    |    |      |     |      |    |                                                     |  |  |  |  |  |  |            |    |    |      |     |      |    |            |    |    |     |     |     |    |                                           |  |  |  |  |  |  |            |    |    |     |     |     |    |            |    |    |      |     |      |    |                                           |  |  |  |  |  |  |            |    |    |      |     |     |    |            |    |    |      |     |      |    |
| Reaction 7                                          | 97                                                                                                                                                                                                                                                                                                                                                                                                                                                                                                                                                                                                                                                                                                                                                                                                                                                                                                                                                                                                                                                                                                                                                                                                                                                                                                                                                                                                                                                                                                                                                                                                                                                                                                                                                                                                                                                                           | 80         | 6.4                         | 2.0                                        | 4.3                                         | 90                                         |                                             |              |                          |  |  |  |  |  |  |                            |    |    |      |     |      |    |                            |    |    |     |     |     |    |                                                |  |  |  |  |  |  |            |    |    |     |     |     |    |            |    |    |      |     |      |    |                                                     |  |  |  |  |  |  |            |    |    |      |     |      |    |            |    |    |     |     |     |    |                                           |  |  |  |  |  |  |            |    |    |     |     |     |    |            |    |    |      |     |      |    |                                           |  |  |  |  |  |  |            |    |    |      |     |     |    |            |    |    |      |     |      |    |
| Reaction 8                                          | 92                                                                                                                                                                                                                                                                                                                                                                                                                                                                                                                                                                                                                                                                                                                                                                                                                                                                                                                                                                                                                                                                                                                                                                                                                                                                                                                                                                                                                                                                                                                                                                                                                                                                                                                                                                                                                                                                           | 83         | 13.6                        | 2.3                                        | 11.3                                        | 90                                         |                                             |              |                          |  |  |  |  |  |  |                            |    |    |      |     |      |    |                            |    |    |     |     |     |    |                                                |  |  |  |  |  |  |            |    |    |     |     |     |    |            |    |    |      |     |      |    |                                                     |  |  |  |  |  |  |            |    |    |      |     |      |    |            |    |    |     |     |     |    |                                           |  |  |  |  |  |  |            |    |    |     |     |     |    |            |    |    |      |     |      |    |                                           |  |  |  |  |  |  |            |    |    |      |     |     |    |            |    |    |      |     |      |    |
| Simulation D: [Acid] = 0.4 M, Yield = 50%           |                                                                                                                                                                                                                                                                                                                                                                                                                                                                                                                                                                                                                                                                                                                                                                                                                                                                                                                                                                                                                                                                                                                                                                                                                                                                                                                                                                                                                                                                                                                                                                                                                                                                                                                                                                                                                                                                              |            |                             |                                            |                                             |                                            |                                             |              |                          |  |  |  |  |  |  |                            |    |    |      |     |      |    |                            |    |    |     |     |     |    |                                                |  |  |  |  |  |  |            |    |    |     |     |     |    |            |    |    |      |     |      |    |                                                     |  |  |  |  |  |  |            |    |    |      |     |      |    |            |    |    |     |     |     |    |                                           |  |  |  |  |  |  |            |    |    |     |     |     |    |            |    |    |      |     |      |    |                                           |  |  |  |  |  |  |            |    |    |      |     |     |    |            |    |    |      |     |      |    |
| Reaction 7                                          | 97                                                                                                                                                                                                                                                                                                                                                                                                                                                                                                                                                                                                                                                                                                                                                                                                                                                                                                                                                                                                                                                                                                                                                                                                                                                                                                                                                                                                                                                                                                                                                                                                                                                                                                                                                                                                                                                                           | 50         | 10.3                        | 3.3                                        | 7.0                                         | 50                                         |                                             |              |                          |  |  |  |  |  |  |                            |    |    |      |     |      |    |                            |    |    |     |     |     |    |                                                |  |  |  |  |  |  |            |    |    |     |     |     |    |            |    |    |      |     |      |    |                                                     |  |  |  |  |  |  |            |    |    |      |     |      |    |            |    |    |     |     |     |    |                                           |  |  |  |  |  |  |            |    |    |     |     |     |    |            |    |    |      |     |      |    |                                           |  |  |  |  |  |  |            |    |    |      |     |     |    |            |    |    |      |     |      |    |
| Reaction 8                                          | 92                                                                                                                                                                                                                                                                                                                                                                                                                                                                                                                                                                                                                                                                                                                                                                                                                                                                                                                                                                                                                                                                                                                                                                                                                                                                                                                                                                                                                                                                                                                                                                                                                                                                                                                                                                                                                                                                           | 46         | 24.5                        | 4.1                                        | 20.3                                        | 50                                         |                                             |              |                          |  |  |  |  |  |  |                            |    |    |      |     |      |    |                            |    |    |     |     |     |    |                                                |  |  |  |  |  |  |            |    |    |     |     |     |    |            |    |    |      |     |      |    |                                                     |  |  |  |  |  |  |            |    |    |      |     |      |    |            |    |    |     |     |     |    |                                           |  |  |  |  |  |  |            |    |    |     |     |     |    |            |    |    |      |     |      |    |                                           |  |  |  |  |  |  |            |    |    |      |     |     |    |            |    |    |      |     |      |    |

<sup>a</sup> Reactions refer to scheme 1 of the manuscript.

### Reported experimental procedures

#### Reaction 7:<sup>6</sup>

To a solution of 1-[(2-nitrophenylamino)carbonyl]-L-proline (11, 88.0 g, 0.315 mol) in THF (530 mL) was added a solution of (*S*)-3-(2-naphthyl)alanyl-*N*-benzyl-*N*-methylamide free base in THF (200 mL) over 15 min while maintaining the internal temperature at 22 °C. THF (50 mL) was used to wash the addition funnel and added to the reaction mixture. 1-Hydroxybenzotriazole (40.54 g, 0.3 mol) was then added. The reaction mixture was stirred at 22 °C for 10 min to dissolve the solids and then cooled to 0 °C. A solution of 1,3-dicyclohexylcarbodiimide (62.53 g, 0.303 mol) in THF (100 mL) was added to the mixture over 15 min while maintaining the internal temperature at 0 °C. The mixture was warmed to 22 °C over 30 min and stirred at 22

°C for 4 h. The product was distilled and the desired product was obtained in 86% (150 g) yield.

Reaction 8:<sup>7</sup>

*N*-methylpiperazine (226 mL, 2.0 mol) was added slowly (15 min) to a slurry of 4-hydroxybenzoic acid (229 g, 2.0 mol) in ethyl acetate (2 L) at 50 - 70 °C. A solution of dicyclohexylcarbodiimide (438 g, 2.1mol) in ethyl acetate (0.4 L) was added over 1.5 h to the salt slurry at 70 - 78 °C. The mixture was refluxed 1 h. The product was obtained in 84% (380 g).



## 2.5 Pivaloyl chloride (PivCl) as coupling reagent

**Table S5.** Literature and simulation A-D for PivCl<sup>a</sup>

|                                                     |                                                                                    |                                         |                                         |                                            |                                             |              |
|-----------------------------------------------------|------------------------------------------------------------------------------------|-----------------------------------------|-----------------------------------------|--------------------------------------------|---------------------------------------------|--------------|
| Reaction 11                                         | 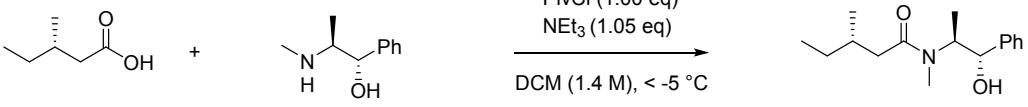 | 116.16 g mol <sup>-1</sup><br>(1.00 eq) | 165.24 g mol <sup>-1</sup><br>(1.00 eq) | 263.38 g mol <sup>-1</sup>                 |                                             |              |
| Reaction 12                                         |  | 252.14 g mol <sup>-1</sup><br>(1.00 eq) | 177.20 g mol <sup>-1</sup><br>(1.10 eq) | 411.33 g mol <sup>-1</sup>                 |                                             |              |
|                                                     | AE<br>(%)                                                                          | RME<br>(%)                              | PMI<br>(g g <sup>-1</sup> )             | PMI <sub>RRC</sub><br>(g g <sup>-1</sup> ) | PMI <sub>solv</sub><br>(g g <sup>-1</sup> ) | Yield<br>(%) |
| Literature data reported                            |                                                                                    |                                         |                                         |                                            |                                             |              |
| Reaction 11: [Acid] = 1.4 M                         | 94                                                                                 | 94                                      | 5.9                                     | 2.3                                        | 3.5                                         | 100          |
| Reaction 12: [Acid] = 0.4 M                         | 96                                                                                 | 86                                      | 8.6                                     | 2.9                                        | 5.7                                         | 93           |
| Simulation A: [Acid] = 0.4 M, Literature yield      |                                                                                    |                                         |                                         |                                            |                                             |              |
| Reaction 11                                         | 94                                                                                 | 94                                      | 15.0                                    | 2.3                                        | 12.6                                        | 100          |
| Reaction 12                                         | 96                                                                                 | 86                                      | 8.6                                     | 2.9                                        | 5.8                                         | 93           |
| Simulation B: [Acid] = Literature data, Yield = 90% |                                                                                    |                                         |                                         |                                            |                                             |              |
| Reaction 11                                         | 94                                                                                 | 84                                      | 6.5                                     | 2.6                                        | 3.9                                         | 90           |
| Reaction 12                                         | 96                                                                                 | 83                                      | 8.9                                     | 3.0                                        | 5.9                                         | 90           |
| Simulation C: [Acid] = 0.4 M, Yield = 90%           |                                                                                    |                                         |                                         |                                            |                                             |              |
| Reaction 11                                         | 94                                                                                 | 84                                      | 16.6                                    | 2.6                                        | 14.0                                        | 90           |
| Reaction 12                                         | 96                                                                                 | 83                                      | 8.9                                     | 3.0                                        | 6.0                                         | 90           |
| Simulation D: [Acid] = 0.4 M, Yield = 50%           |                                                                                    |                                         |                                         |                                            |                                             |              |
| Reaction 11                                         | 94                                                                                 | 47                                      | 29.9                                    | 4.7                                        | 25.2                                        | 50           |
| Reaction 12                                         | 96                                                                                 | 46                                      | 16.1                                    | 5.3                                        | 10.7                                        | 50           |

<sup>a</sup> Reactions refer to scheme 1 of the manuscript.

### Reported experimental procedures

#### Reaction 11:<sup>10</sup>

To a solution of the acid (2.32 kg, 20.00 mol) in CH<sub>2</sub>Cl<sub>2</sub> (14 L) at -5 °C was added Et<sub>3</sub>N (2.93 L, 2.12 kg, 21.00 mol, 1.05 equiv), followed by pivaloyl chloride (2.46 L, 2.41 kg, 20.00 mol, 1.00 equiv), while maintaining the internal temperature < 0 °C. The resultant slurry was stirred for 1 h, and then Et<sub>3</sub>N (2.93 L, 2.12 kg, 21.00 mol, 1.05 equiv) was added. (1S,2S)-(+)-Pseudoephedrine (3.30 kg, 20.00 mol, 1.00 equiv) was added as a solid in portions, maintaining the internal temperature < 5 °C. The resultant slurry was stirred for 1 h, and water (14 L) was added. The amide was obtained in quantitative amount.

#### Reaction 12:<sup>11</sup>

Acid (11 kg, 43.63 mol), (S)-(-)-4-benzyl-2-oxazolidinone (8.5 kg, 47.97 mol, 1.1 equiv) and LiCl (3.7 kg, 87.28 mol, 2.0 equiv) were added to THF (95.7 kg) cooled to

-15 °C. The temperature was adjusted to 20 °C, the mixture was stirred for 30 min and then cooled to -21 °C. Trimethyl acetyl chloride (13.1 kg, 108.54 mol, 2.5 equiv) was added over 30 min at -21 °C. Triethylamine (11.5 kg, 113.64 mol, 2.6 equiv) was added over 4.5 h at -22 to -20 °C. The mixture was stirred at -23 °C for 30 min. The reaction completion was confirmed by HPLC (no residual acid 9 was detected). The product was obtained in 93% yield (16.68 kg).

## 2.6 Isobutyl chloroformate (IBCF) as coupling reagent

**Table S6.** Literature and simulation A-D for IBCF<sup>a</sup>

Reaction 13

Reaction 13 shows the conversion of a starting material (774.73 g mol<sup>-1</sup>, 1.00 eq) and an amine salt (313.37 g mol<sup>-1</sup>, 1.12 eq) into a product (897.88 g mol<sup>-1</sup>). The reaction conditions are: CICO<sub>2</sub>*i*-Bu (1.10 eq), NMM (2.20 eq), THF (0.2 M), and -10 to 10 °C.

| Scheme                                              | AE (%) | RME (%) | PMI (g g <sup>-1</sup> ) | PMI <sub>RRC</sub> (g g <sup>-1</sup> ) | PMI <sub>solv</sub> (g g <sup>-1</sup> ) | Yield (%) |
|-----------------------------------------------------|--------|---------|--------------------------|-----------------------------------------|------------------------------------------|-----------|
| Literature data reported                            |        |         |                          |                                         |                                          |           |
| [Acid] = 1.4 M                                      | 83     | 67      | 8.3                      | 2.0                                     | 6.3                                      | 84        |
| Simulation A: [Acid] = 0.4 M, Literature yield      |        |         |                          |                                         |                                          |           |
|                                                     | 83     | 67      | 4.9                      | 2.0                                     | 2.9                                      | 84        |
| Simulation B: [Acid] = Literature data, Yield = 90% |        |         |                          |                                         |                                          |           |
|                                                     | 83     | 72      | 7.8                      | 1.9                                     | 5.9                                      | 90        |
| Simulation C: [Acid] = 0.4 M, Yield = 90%           |        |         |                          |                                         |                                          |           |
|                                                     | 83     | 72      | 4.6                      | 1.9                                     | 2.7                                      | 90        |
| Simulation D: [Acid] = 0.4 M, Yield = 50%           |        |         |                          |                                         |                                          |           |
|                                                     | 83     | 40      | 8.3                      | 3.4                                     | 4.9                                      | 50        |

<sup>a</sup> Reaction refers to scheme 1 of the manuscript.

### Reported experimental procedure

#### Reaction 13:<sup>12</sup>

A reactor was charged with the acid (15.7 kg, 20.6 mol, 1.0 equiv) and THF (110 L, dry). The mixture was agitated until a solution was formed, then the jacket was adjusted so that the internal temperature was approximately 158 °C. *N*-methylmorpholine (2.31 kg, 22.9 mol, 1.1 eq) was then slowly added at a rate that maintained the internal temperature at 108 °C. By using a pre-calibrated metering valve, isobutyl chloroformate (3.13 kg, 22.9 mol, 1.1 eq) was slowly added. On this scale the addition took 50 min. The internal temperature was adjusted to 108 °C and held for 90 min. Aminocyclopropane salt (7.12 kg, 22.9 mol, 1.1 eq) was then added through a solid-charging funnel and the internal temperature was maintained at 88 °C. A second charge of *N*-methylmorpholine (2.29 kg, 22.7 mol, 1.1 eq) was then added at a rate that maintained the internal temperature at 88 °C. The reaction was held at 108 °C for 2 h, then warmed to 108 °C, and held at that temperature until conversion was at least 95% by HPLC analysis (this batch required 12 h). The product was obtained in 85% (15.43 kg) yield.



2.7 Propylphosphonic anhydride (T<sub>3</sub>P) as coupling reagentTable S7. Literature and simulation A-D for T<sub>3</sub>P<sup>a</sup>

Reaction 14

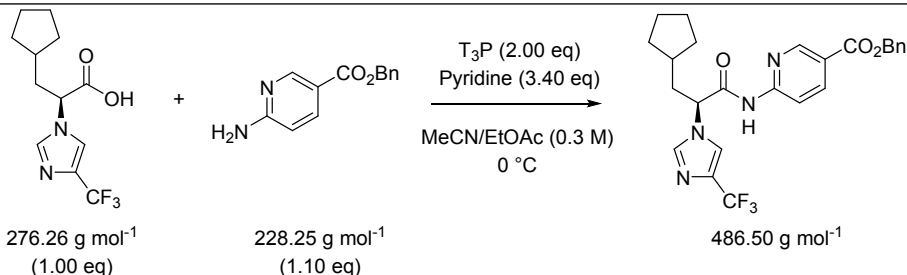

276.26 g mol<sup>-1</sup>  
(1.00 eq)

228.25 g mol<sup>-1</sup>  
(1.10 eq)

486.50 g mol<sup>-1</sup>

T<sub>3</sub>P (2.00 eq)  
Pyridine (3.40 eq)  
MeCN/EtOAc (0.3 M)  
0 °C

| Scheme                                              | AE (%) | RME (%) | PMI (g g <sup>-1</sup> ) | PMI <sub>RRC</sub> (g g <sup>-1</sup> ) | PMI <sub>solv</sub> (g g <sup>-1</sup> ) | Yield (%) |
|-----------------------------------------------------|--------|---------|--------------------------|-----------------------------------------|------------------------------------------|-----------|
| Literature data reported                            |        |         |                          |                                         |                                          |           |
| [Acid] = 0.3 M                                      | 96     | 81      | 9.8                      | 3.3                                     | 6.4                                      | 88        |
| Simulation A: [Acid] = 0.4 M, Literature yield      |        |         |                          |                                         |                                          |           |
|                                                     | 96     | 81      | 8.1                      | 3.3                                     | 4.7                                      | 88        |
| Simulation B: [Acid] = Literature data, Yield = 90% |        |         |                          |                                         |                                          |           |
|                                                     | 96     | 83      | 9.6                      | 3.3                                     | 6.3                                      | 90        |
| Simulation C: [Acid] = 0.4 M, Yield = 90%           |        |         |                          |                                         |                                          |           |
|                                                     | 96     | 83      | 7.9                      | 3.3                                     | 4.6                                      | 90        |
| Simulation D: [Acid] = 0.4 M, Yield = 50%           |        |         |                          |                                         |                                          |           |
|                                                     | 96     | 46      | 14.2                     | 5.9                                     | 8.3                                      | 50        |

<sup>a</sup> Reaction refers to scheme 1 of the manuscript.

## Reported experimental procedure

Reaction 14:<sup>13</sup>

A stirred mixture of the acid (22.00 kg, 79.64 mol), the amine (20.00 kg, 87.62 mol, 1.1 equiv), pyridine (22 L), MeCN (110 L), and EtOAc (57 L) was charged with T<sub>3</sub>P solution (50 wt% MeCN, 101 kg, 104 L, 159 mol, 2.0 equiv) at -5 °C. The resulting homogeneous solution was held at 0 °C for 20 h as fine solids precipitated. The product was obtained in 88% yield (34.08 kg) as a white solid.

### 3 Mitsunobu reaction

The Mitsunobu reaction was selected as a second model reaction for our simulations in sections 3.1-3.4. The Mitsunobu reaction allows the conversion of primary and secondary alcohols to esters. Triphenylphosphine ( $\text{PPh}_3$ ) is combined with an AZO-compound such as diethyl azodicarboxylate (DEAD), ethyl 2-(3,4-dichlorophenyl)diazene-1-carboxylate (DCPEAC) or ethyl 2-(3,4-dibromophenyl)diazene-1-carboxylate (DBPEAC) to generate a phosphonium intermediate that binds to the alcohol oxygen, activating it as a leaving group. Subsequent nucleophilic substitution with the a carboxylate generates the desired ester together with triphenylphosphine oxide.

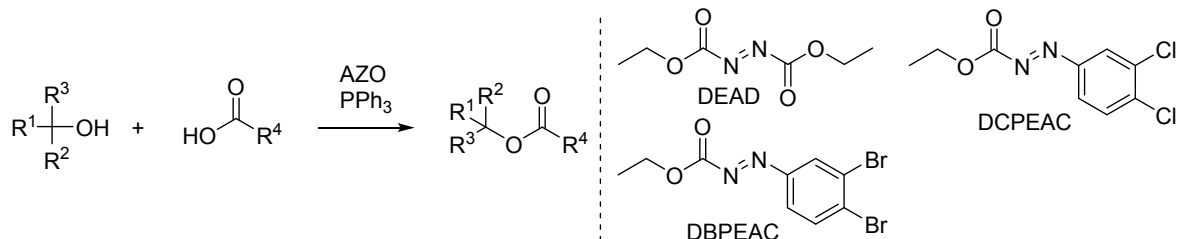

We applied in the following sections green metric simulations with DEAD, DCPEAC or DBPEAC as coupling reagent.

- Simulation 1:
  - The acid is the limiting reactant and is present in a 0.4 M solution.
  - All other reactants are present in 1.2 equivalents.
  - A yield of 90% for the ester is assumed.
- Simulation 2:
  - The acid is the limiting reactant and is present in a 0.4 M solution.
  - The other reactants are present in 1.2 equivalents.
  - A yield of 80% for the ester is assumed.
- Simulation 3:
  - The acid is the limiting reactant and is present in a 0.4 M solution.
  - The other reactants are present in 1.2 equivalents.
  - A yield of 70% for the ester is assumed.
- Simulation 4:
  - The acid is the limiting reactant and is present in a 0.4 M solution.
  - The other reactants are present in 1.2 equivalents.
  - A yield of 50% for the ester is assumed.
- Simulation 5:
  - The acid is the limiting reactant and is present in a 0.4 M solution.
  - The other reactants are present in 1.2 equivalents.
  - A yield of 90% for the ester is assumed.
  - The scale of the reaction is multiplied by 5 compared to simulation A.
- Simulation 6:
  - The acid is the limiting reactant and is present in a 0.8 M solution.
  - The other reactants are present in 1.2 equivalents.
  - A yield of 90% for the ester is assumed.

#### 3.1 Diethyl azodicarboxylate (DEAD) as coupling reagent

These green metrics simulations have been incorporated in the manuscript and can be found in table 7.

### 3.2 Ethyl 2-(3,4-dichlorophenyl)diazene-1-carboxylate as coupling reagent

**Table S8.** Green metrics simulations applied on the Mitsunobu reaction with ethyl 2-(3,4-dichlorophenyl)diazene-1-carboxylate (DCPEAC) as coupling reagent.

| <br>A<br>122.12 g mol <sup>-1</sup>                          | <br>B<br>156.57 g mol <sup>-1</sup> | <br>C<br>212.12 g mol <sup>-1</sup> | <br>D<br>310.77 g mol <sup>-1</sup> | <br>E<br>440.50 g mol <sup>-1</sup>     |                                          |           |
|--------------------------------------------------------------|-------------------------------------|-------------------------------------|-------------------------------------|-----------------------------------------|------------------------------------------|-----------|
| Carboxylic acid                                              | AE (%)                              | RME (%)                             | PMI (g g <sup>-1</sup> )            | PMI <sub>RRC</sub> (g g <sup>-1</sup> ) | PMI <sub>solv</sub> (g g <sup>-1</sup> ) | Yield (%) |
| Simulation 1: [Acid] = 0.4 M, Yield = 90%                    |                                     |                                     |                                     |                                         |                                          |           |
| A                                                            | 92                                  | 76                                  | 16.2                                | 4.5                                     | 11.6                                     | 90        |
| B                                                            | 93                                  | 78                                  | 14.1                                | 4.0                                     | 10.0                                     | 90        |
| C                                                            | 94                                  | 80                                  | 11.7                                | 3.5                                     | 8.2                                      | 90        |
| D                                                            | 96                                  | 82                                  | 9.1                                 | 2.9                                     | 6.2                                      | 90        |
| E                                                            | 97                                  | 84                                  | 7.1                                 | 2.5                                     | 4.7                                      | 90        |
| Simulation 2: [Acid] = 0.4 M, Yield = 80%                    |                                     |                                     |                                     |                                         |                                          |           |
| A                                                            | 92                                  | 67                                  | 18.2                                | 5.1                                     | 13.1                                     | 80        |
| B                                                            | 93                                  | 69                                  | 15.8                                | 4.5                                     | 11.3                                     | 80        |
| C                                                            | 94                                  | 71                                  | 13.1                                | 3.9                                     | 9.2                                      | 80        |
| D                                                            | 96                                  | 73                                  | 10.2                                | 3.3                                     | 6.9                                      | 80        |
| E                                                            | 97                                  | 74                                  | 8.0                                 | 2.8                                     | 5.2                                      | 80        |
| Simulation 3: [Acid] = 0.4 M, Yield = 70%                    |                                     |                                     |                                     |                                         |                                          |           |
| A                                                            | 92                                  | 59                                  | 20.8                                | 5.8                                     | 15.0                                     | 70        |
| B                                                            | 93                                  | 60                                  | 18.1                                | 5.2                                     | 12.9                                     | 70        |
| C                                                            | 94                                  | 62                                  | 15.0                                | 4.5                                     | 10.5                                     | 70        |
| D                                                            | 96                                  | 64                                  | 11.7                                | 3.7                                     | 7.9                                      | 70        |
| E                                                            | 97                                  | 65                                  | 9.2                                 | 3.2                                     | 6.0                                      | 70        |
| Simulation 4: [Acid] = 0.4 M, Yield = 50%                    |                                     |                                     |                                     |                                         |                                          |           |
| A                                                            | 92                                  | 42                                  | 29.1                                | 8.1                                     | 20.9                                     | 50        |
| B                                                            | 93                                  | 43                                  | 25.3                                | 7.3                                     | 18.0                                     | 50        |
| C                                                            | 94                                  | 44                                  | 21.0                                | 6.3                                     | 14.7                                     | 50        |
| D                                                            | 96                                  | 46                                  | 16.3                                | 5.2                                     | 11.1                                     | 50        |
| E                                                            | 97                                  | 47                                  | 12.8                                | 4.5                                     | 8.4                                      | 50        |
| Simulation 5: Scale reaction x5, [Acid] = 0.4 M, Yield = 90% |                                     |                                     |                                     |                                         |                                          |           |
| A                                                            | 92                                  | 76                                  | 16.1                                | 4.5                                     | 11.6                                     | 90        |
| B                                                            | 93                                  | 78                                  | 14.1                                | 4.0                                     | 10.0                                     | 90        |
| C                                                            | 94                                  | 80                                  | 11.7                                | 3.5                                     | 8.2                                      | 90        |
| D                                                            | 96                                  | 82                                  | 11.9                                | 2.9                                     | 9.0                                      | 90        |
| E                                                            | 97                                  | 84                                  | 12.1                                | 2.5                                     | 9.7                                      | 90        |
| Simulation 6: [Acid] = 0.8 M, Yield = 90%                    |                                     |                                     |                                     |                                         |                                          |           |
| A                                                            | 92                                  | 76                                  | 10.3                                | 4.5                                     | 5.8                                      | 90        |
| B                                                            | 93                                  | 78                                  | 9.0                                 | 4.0                                     | 5.0                                      | 90        |
| C                                                            | 94                                  | 80                                  | 7.6                                 | 3.5                                     | 4.1                                      | 90        |
| D                                                            | 96                                  | 82                                  | 6.0                                 | 2.9                                     | 3.1                                      | 90        |
| E                                                            | 97                                  | 84                                  | 4.8                                 | 2.5                                     | 2.3                                      | 90        |

### 3.3 Ethyl 2-(3,4-dibromophenyl)diazene-1-carboxylate as coupling reagent

**Table S9.** Green metrics simulations applied on the Mitsunobu reaction with ethyl 2-(3,4-dibromophenyl)diazene-1-carboxylate (DBPEAC) as coupling reagent.

| <div> </div>                                                 |                                     |                                     |                                     |                                         |                                          |           |
|--------------------------------------------------------------|-------------------------------------|-------------------------------------|-------------------------------------|-----------------------------------------|------------------------------------------|-----------|
| <br>A<br>122.12 g mol <sup>-1</sup>                          | <br>B<br>156.57 g mol <sup>-1</sup> | <br>C<br>212.12 g mol <sup>-1</sup> | <br>D<br>310.77 g mol <sup>-1</sup> | <br>E<br>440.50 g mol <sup>-1</sup>     |                                          |           |
| Carboxylic acid                                              | AE (%)                              | RME (%)                             | PMI (g g <sup>-1</sup> )            | PMI <sub>RRC</sub> (g g <sup>-1</sup> ) | PMI <sub>solv</sub> (g g <sup>-1</sup> ) | Yield (%) |
| Simulation 1: [Acid] = 0.4 M, Yield = 90%                    |                                     |                                     |                                     |                                         |                                          |           |
| A                                                            | 92                                  | 76                                  | 16.7                                | 5.1                                     | 11.6                                     | 90        |
| B                                                            | 93                                  | 78                                  | 14.5                                | 4.5                                     | 10.0                                     | 90        |
| C                                                            | 94                                  | 80                                  | 12.1                                | 3.9                                     | 8.2                                      | 90        |
| D                                                            | 96                                  | 82                                  | 9.4                                 | 3.2                                     | 6.2                                      | 90        |
| E                                                            | 97                                  | 84                                  | 7.4                                 | 2.7                                     | 4.7                                      | 90        |
| Simulation 2: [Acid] = 0.4 M, Yield = 80%                    |                                     |                                     |                                     |                                         |                                          |           |
| A                                                            | 92                                  | 67                                  | 18.8                                | 5.7                                     | 13.1                                     | 80        |
| B                                                            | 93                                  | 69                                  | 16.4                                | 5.1                                     | 11.3                                     | 80        |
| C                                                            | 94                                  | 71                                  | 13.6                                | 4.4                                     | 9.2                                      | 80        |
| D                                                            | 96                                  | 73                                  | 10.5                                | 3.6                                     | 6.9                                      | 80        |
| E                                                            | 97                                  | 74                                  | 8.3                                 | 3.0                                     | 5.2                                      | 80        |
| Simulation 3: [Acid] = 0.4 M, Yield = 70%                    |                                     |                                     |                                     |                                         |                                          |           |
| A                                                            | 92                                  | 59                                  | 21.5                                | 6.5                                     | 15.0                                     | 70        |
| B                                                            | 93                                  | 60                                  | 18.7                                | 5.8                                     | 12.9                                     | 70        |
| C                                                            | 94                                  | 62                                  | 15.5                                | 5.0                                     | 10.5                                     | 70        |
| D                                                            | 96                                  | 64                                  | 12.0                                | 4.1                                     | 7.9                                      | 70        |
| E                                                            | 97                                  | 65                                  | 9.5                                 | 3.5                                     | 6.0                                      | 70        |
| Simulation 4: [Acid] = 0.4 M, Yield = 50%                    |                                     |                                     |                                     |                                         |                                          |           |
| A                                                            | 92                                  | 42                                  | 30.1                                | 9.1                                     | 20.9                                     | 50        |
| B                                                            | 93                                  | 43                                  | 26.2                                | 8.1                                     | 18.0                                     | 50        |
| C                                                            | 94                                  | 44                                  | 21.7                                | 7.0                                     | 14.7                                     | 50        |
| D                                                            | 96                                  | 46                                  | 16.9                                | 5.8                                     | 11.1                                     | 50        |
| E                                                            | 97                                  | 47                                  | 13.2                                | 4.9                                     | 8.4                                      | 50        |
| Simulation 5: Scale reaction x5, [Acid] = 0.4 M, Yield = 90% |                                     |                                     |                                     |                                         |                                          |           |
| A                                                            | 92                                  | 76                                  | 16.7                                | 5.1                                     | 11.6                                     | 90        |
| B                                                            | 93                                  | 78                                  | 14.5                                | 4.5                                     | 10.0                                     | 90        |
| C                                                            | 94                                  | 80                                  | 12.1                                | 3.9                                     | 8.2                                      | 90        |
| D                                                            | 96                                  | 82                                  | 12.2                                | 3.2                                     | 9.0                                      | 90        |
| E                                                            | 97                                  | 84                                  | 12.4                                | 2.7                                     | 9.7                                      | 90        |
| Simulation 6: [Acid] = 0.8 M, Yield = 90%                    |                                     |                                     |                                     |                                         |                                          |           |
| A                                                            | 92                                  | 76                                  | 10.9                                | 5.1                                     | 5.8                                      | 90        |
| B                                                            | 93                                  | 78                                  | 9.5                                 | 4.5                                     | 5.0                                      | 90        |
| C                                                            | 94                                  | 80                                  | 8.0                                 | 3.9                                     | 4.1                                      | 90        |
| D                                                            | 96                                  | 82                                  | 6.3                                 | 3.2                                     | 3.1                                      | 90        |
| E                                                            | 97                                  | 84                                  | 5.0                                 | 2.7                                     | 2.3                                      | 90        |

### 3.4 Altering the acid concentration with DEAD as coupling partner

In this section the effect of altering the acid concentration on the Mitsunobu was examined. In Table S10 the reagents and reactants are added in equimolar amounts and a yield of 90% for the ester is assumed. The acid concentration is varied between 0.1 M and 2.0 M in simulations 1-4.

**Table S10.** Altering the acid concentration with DEAD as coupling reagent.

| <div style="display: flex; align-items: center; justify-content: space-around;"> <div style="text-align: center;"> <p>108.14 g mol<sup>-1</sup><br/>(1.0 eq)</p> <p><b>A - E</b><br/>(1.0 eq)</p> </div> <div style="text-align: center;"> <p>PPh<sub>3</sub> (1.0 eq, 262.29 g mol<sup>-1</sup>)<br/>DEAD (1.0 eq)<br/>THF (0.4 M)</p> </div> <div style="text-align: center;"> <p>174.16 g mol<sup>-1</sup><br/>DEAD</p> </div> </div>                                                                                                     |        |         |                          |                                         |                                          |           |
|----------------------------------------------------------------------------------------------------------------------------------------------------------------------------------------------------------------------------------------------------------------------------------------------------------------------------------------------------------------------------------------------------------------------------------------------------------------------------------------------------------------------------------------------|--------|---------|--------------------------|-----------------------------------------|------------------------------------------|-----------|
| <div style="display: flex; justify-content: space-around; align-items: flex-end;"> <div style="text-align: center;"> <p><b>A</b><br/>122.12 g mol<sup>-1</sup></p> </div> <div style="text-align: center;"> <p><b>B</b><br/>156.57 g mol<sup>-1</sup></p> </div> <div style="text-align: center;"> <p><b>C</b><br/>212.12 g mol<sup>-1</sup></p> </div> <div style="text-align: center;"> <p><b>D</b><br/>310.77 g mol<sup>-1</sup></p> </div> <div style="text-align: center;"> <p><b>E</b><br/>440.50 g mol<sup>-1</sup></p> </div> </div> |        |         |                          |                                         |                                          |           |
| Carboxylic acid                                                                                                                                                                                                                                                                                                                                                                                                                                                                                                                              | AE (%) | RME (%) | PMI (g g <sup>-1</sup> ) | PMI <sub>RRC</sub> (g g <sup>-1</sup> ) | PMI <sub>solv</sub> (g g <sup>-1</sup> ) | Yield (%) |
| Simulation 1: [Acid] = 0.1 M                                                                                                                                                                                                                                                                                                                                                                                                                                                                                                                 |        |         |                          |                                         |                                          |           |
| A                                                                                                                                                                                                                                                                                                                                                                                                                                                                                                                                            | 92     | 83      | 49.8                     | 3.5                                     | 46.3                                     | 90        |
| B                                                                                                                                                                                                                                                                                                                                                                                                                                                                                                                                            | 93     | 84      | 43.0                     | 3.2                                     | 39.9                                     | 90        |
| C                                                                                                                                                                                                                                                                                                                                                                                                                                                                                                                                            | 94     | 85      | 35.3                     | 2.8                                     | 32.5                                     | 90        |
| D                                                                                                                                                                                                                                                                                                                                                                                                                                                                                                                                            | 96     | 86      | 26.9                     | 2.4                                     | 24.5                                     | 90        |
| E                                                                                                                                                                                                                                                                                                                                                                                                                                                                                                                                            | 97     | 87      | 20.6                     | 2.1                                     | 18.5                                     | 90        |
| Simulation 2: [Acid] = 0.5 M                                                                                                                                                                                                                                                                                                                                                                                                                                                                                                                 |        |         |                          |                                         |                                          |           |
| A                                                                                                                                                                                                                                                                                                                                                                                                                                                                                                                                            | 92     | 83      | 12.8                     | 3.5                                     | 9.3                                      | 90        |
| B                                                                                                                                                                                                                                                                                                                                                                                                                                                                                                                                            | 93     | 84      | 11.2                     | 3.2                                     | 8.0                                      | 90        |
| C                                                                                                                                                                                                                                                                                                                                                                                                                                                                                                                                            | 94     | 85      | 9.3                      | 2.8                                     | 6.5                                      | 90        |
| D                                                                                                                                                                                                                                                                                                                                                                                                                                                                                                                                            | 96     | 86      | 7.3                      | 2.4                                     | 4.9                                      | 90        |
| E                                                                                                                                                                                                                                                                                                                                                                                                                                                                                                                                            | 97     | 87      | 5.8                      | 2.1                                     | 3.7                                      | 90        |
| Simulation 3: [Acid] = 1.0 M                                                                                                                                                                                                                                                                                                                                                                                                                                                                                                                 |        |         |                          |                                         |                                          |           |
| A                                                                                                                                                                                                                                                                                                                                                                                                                                                                                                                                            | 92     | 83      | 8.1                      | 3.5                                     | 4.7                                      | 90        |
| B                                                                                                                                                                                                                                                                                                                                                                                                                                                                                                                                            | 93     | 84      | 7.2                      | 3.2                                     | 4.0                                      | 90        |
| C                                                                                                                                                                                                                                                                                                                                                                                                                                                                                                                                            | 94     | 85      | 6.1                      | 2.8                                     | 3.3                                      | 90        |
| D                                                                                                                                                                                                                                                                                                                                                                                                                                                                                                                                            | 96     | 86      | 4.8                      | 2.4                                     | 2.5                                      | 90        |
| E                                                                                                                                                                                                                                                                                                                                                                                                                                                                                                                                            | 97     | 87      | 3.9                      | 2.1                                     | 1.9                                      | 90        |
| Simulation 4: [Acid] = 2.0 M                                                                                                                                                                                                                                                                                                                                                                                                                                                                                                                 |        |         |                          |                                         |                                          |           |
| A                                                                                                                                                                                                                                                                                                                                                                                                                                                                                                                                            | 92     | 83      | 5.8                      | 3.5                                     | 2.3                                      | 90        |
| B                                                                                                                                                                                                                                                                                                                                                                                                                                                                                                                                            | 93     | 84      | 5.2                      | 3.2                                     | 2.0                                      | 90        |
| C                                                                                                                                                                                                                                                                                                                                                                                                                                                                                                                                            | 94     | 85      | 4.4                      | 2.8                                     | 1.6                                      | 90        |
| D                                                                                                                                                                                                                                                                                                                                                                                                                                                                                                                                            | 96     | 86      | 3.6                      | 2.4                                     | 1.2                                      | 90        |
| E                                                                                                                                                                                                                                                                                                                                                                                                                                                                                                                                            | 97     | 87      | 3.0                      | 2.1                                     | 0.9                                      | 90        |

In Table S11 the benzyl alcohol is added in 4.0 equivalents while all other reactants and reagents are added in equimolar amounts. Moreover, a yield of 90% for the ester is assumed. The acid concentration is varied again between 0.1 M and 2.0 M in simulations 1-4.

**Table S11.** Altering the acid concentration with DEAD as coupling reagent with an excess of the alcohol.

| <div style="display: flex; align-items: center; justify-content: space-around;"> <div style="text-align: center;"> <p>108.14 g mol<sup>-1</sup><br/>(4.0 eq)</p> <p><b>A - E</b><br/>(1.0 eq)</p> </div> <div style="text-align: center;"> <p>174.16 g mol<sup>-1</sup><br/>DEAD</p> </div> </div>                                                                                                                                                                                                                                           |        |         |                          |                                         |                                          |           |
|----------------------------------------------------------------------------------------------------------------------------------------------------------------------------------------------------------------------------------------------------------------------------------------------------------------------------------------------------------------------------------------------------------------------------------------------------------------------------------------------------------------------------------------------|--------|---------|--------------------------|-----------------------------------------|------------------------------------------|-----------|
| <div style="display: flex; justify-content: space-around; align-items: flex-end;"> <div style="text-align: center;"> <p><b>A</b><br/>122.12 g mol<sup>-1</sup></p> </div> <div style="text-align: center;"> <p><b>B</b><br/>156.57 g mol<sup>-1</sup></p> </div> <div style="text-align: center;"> <p><b>C</b><br/>212.12 g mol<sup>-1</sup></p> </div> <div style="text-align: center;"> <p><b>D</b><br/>310.77 g mol<sup>-1</sup></p> </div> <div style="text-align: center;"> <p><b>E</b><br/>440.50 g mol<sup>-1</sup></p> </div> </div> |        |         |                          |                                         |                                          |           |
| Carboxylic acid                                                                                                                                                                                                                                                                                                                                                                                                                                                                                                                              | AE (%) | RME (%) | PMI (g g <sup>-1</sup> ) | PMI <sub>RRC</sub> (g g <sup>-1</sup> ) | PMI <sub>solv</sub> (g g <sup>-1</sup> ) | Yield (%) |
| Simulation 1: [Acid] = 0.1 M                                                                                                                                                                                                                                                                                                                                                                                                                                                                                                                 |        |         |                          |                                         |                                          |           |
| A                                                                                                                                                                                                                                                                                                                                                                                                                                                                                                                                            | 92     | 34      | 58.4                     | 12.0                                    | 46.3                                     | 90        |
| B                                                                                                                                                                                                                                                                                                                                                                                                                                                                                                                                            | 93     | 38      | 50.4                     | 10.5                                    | 39.9                                     | 90        |
| C                                                                                                                                                                                                                                                                                                                                                                                                                                                                                                                                            | 94     | 42      | 41.3                     | 8.8                                     | 32.5                                     | 90        |
| D                                                                                                                                                                                                                                                                                                                                                                                                                                                                                                                                            | 96     | 49      | 31.4                     | 6.9                                     | 24.5                                     | 90        |
| E                                                                                                                                                                                                                                                                                                                                                                                                                                                                                                                                            | 97     | 55      | 24.0                     | 5.5                                     | 18.5                                     | 90        |
| Simulation 2: [Acid] = 0.5 M                                                                                                                                                                                                                                                                                                                                                                                                                                                                                                                 |        |         |                          |                                         |                                          |           |
| A                                                                                                                                                                                                                                                                                                                                                                                                                                                                                                                                            | 92     | 34      | 21.4                     | 12.0                                    | 9.3                                      | 90        |
| B                                                                                                                                                                                                                                                                                                                                                                                                                                                                                                                                            | 93     | 38      | 18.5                     | 10.5                                    | 8.0                                      | 90        |
| C                                                                                                                                                                                                                                                                                                                                                                                                                                                                                                                                            | 94     | 42      | 15.3                     | 8.8                                     | 6.5                                      | 90        |
| D                                                                                                                                                                                                                                                                                                                                                                                                                                                                                                                                            | 96     | 49      | 11.8                     | 6.9                                     | 4.9                                      | 90        |
| E                                                                                                                                                                                                                                                                                                                                                                                                                                                                                                                                            | 97     | 55      | 9.2                      | 5.5                                     | 3.7                                      | 90        |
| Simulation 3: [Acid] = 1.0 M                                                                                                                                                                                                                                                                                                                                                                                                                                                                                                                 |        |         |                          |                                         |                                          |           |
| A                                                                                                                                                                                                                                                                                                                                                                                                                                                                                                                                            | 92     | 34      | 16.7                     | 12.0                                    | 4.7                                      | 90        |
| B                                                                                                                                                                                                                                                                                                                                                                                                                                                                                                                                            | 93     | 38      | 14.5                     | 10.5                                    | 4.0                                      | 90        |
| C                                                                                                                                                                                                                                                                                                                                                                                                                                                                                                                                            | 94     | 42      | 12.1                     | 8.8                                     | 3.3                                      | 90        |
| D                                                                                                                                                                                                                                                                                                                                                                                                                                                                                                                                            | 96     | 49      | 9.4                      | 6.9                                     | 2.5                                      | 90        |
| E                                                                                                                                                                                                                                                                                                                                                                                                                                                                                                                                            | 97     | 55      | 7.3                      | 5.5                                     | 1.9                                      | 90        |
| Simulation 4: [Acid] = 2.0 M                                                                                                                                                                                                                                                                                                                                                                                                                                                                                                                 |        |         |                          |                                         |                                          |           |
| A                                                                                                                                                                                                                                                                                                                                                                                                                                                                                                                                            | 92     | 34      | 14.4                     | 12.0                                    | 2.3                                      | 90        |
| B                                                                                                                                                                                                                                                                                                                                                                                                                                                                                                                                            | 93     | 38      | 12.5                     | 10.5                                    | 2.0                                      | 90        |
| C                                                                                                                                                                                                                                                                                                                                                                                                                                                                                                                                            | 94     | 42      | 10.4                     | 8.8                                     | 1.6                                      | 90        |
| D                                                                                                                                                                                                                                                                                                                                                                                                                                                                                                                                            | 96     | 49      | 8.1                      | 6.9                                     | 1.2                                      | 90        |
| E                                                                                                                                                                                                                                                                                                                                                                                                                                                                                                                                            | 97     | 55      | 6.4                      | 5.5                                     | 0.9                                      | 90        |

### 3.5 Catalytic Mitsunobu reaction

In this section the recent advances towards a catalytic Mitsunobu reaction were evaluated and compared with the classical alcohol activation with stoichiometric phosphine and azodicarboxylate. Four different catalytic conditions were evaluated:

- The first example of a Mitsunobu protocol utilising a sub-stoichiometric azodicarboxylate reagent and di(acetoxy)iodobenzene as sacrificial oxidant, was reported by Toy in 2006.<sup>14, 15</sup>

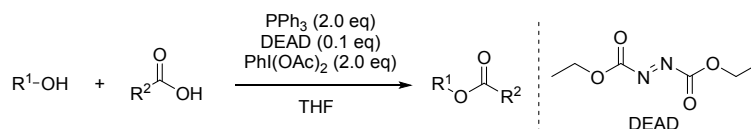

- **Representative experimental procedure:** To 4-nitrobenzoic acid (0.33 g, 1.98 mmol) and 2-phenylethanol (0.21 mL, 1.8 mmol) in anhydrous THF (15 mL), was added triphenylphosphine (0.94 g, 3.6 mmol), diethyl azodicarboxylate (0.028 mL, 0.18 mmol), and iodosobenzene diacetate (1.16 g, 3.6 mmol). The reaction was stirred at rt for 16 h and then the reaction mixture was diluted with diethyl ether (30 mL). The organic phase was washed with saturated aq. NaHCO<sub>3</sub> (2 x 20 mL) and brine (20 mL). The organic layer was dried with Na<sub>2</sub>SO<sub>4</sub>, filtered and evaporated. The residue was purified by column chromatography to afford 2-phenylethyl 4-nitrobenzoate (90%) as yellow solid.
- Taniguchi and co-workers developed an alternative oxidation system for the *in situ* recycling of the azodicarboxylate, using an iron phthalocyanine co-catalyst, with oxygen as the terminal oxidant.<sup>16</sup>

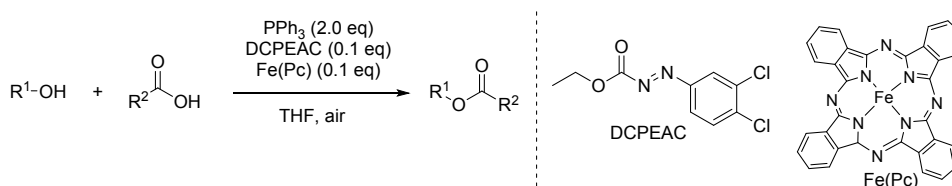

- **Representative experimental procedure:** A mixture of (S)-ethyl lactate (100 mg, 0.850 mmol), 3,5-dinitrobenzoic acid (198 mg, 0.935 mmol), triphenylphosphine (446 mg, 1.70 mmol), hydrazine (21.2 mg, 0.0850 mmol), iron phthalocyanine (48.3 mg, 0.0850 mmol) and activated 5 Å MS (400 mg) in THF (1.7 mL) was heated at 65 °C under air (balloon). After the reaction mixture was cooled to room temperature and filtered, the solvent was removed under reduced pressure. The residue was purified by silica gel chromatography (n-hexane/EtOAc, 6:1). The ester was isolated (209 mg, 79%, 98:2 e.r.) as a white solid.
- Buonomo and Aldrich proposed also disclosed a strategy where a substoichiometric phosphine oxide was used as a putative precatalyst in combination with phenyl silane and stoichiometric azodicarboxylate.<sup>17</sup>

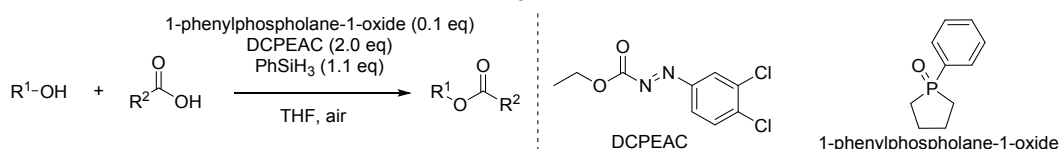

- **Representative experimental procedure:** To a 15 mL pressure tube equipped with a stir bar was added 1-phenylphospholane-1-oxide (18 mg, 0.10 equiv, 0.10 mmol) and 4-nitrobenzoic acid (250 mg, 1.5 equiv, 1.5 mmol). Then, THF (4 mL) was added followed by benzyl alcohol (103 mL, 1.0 equiv, 1.0 mmol), DIAD (216 mL, 1.1 equiv, 1.1 mmol), and phenylsilane (135 mL, 1.1 equiv, 1.1 mmol). The reaction vessel was sealed and heated to 80 °C for 18 h. The reaction was

cooled to 23 °C and concentrated under reduced pressure. The residue was purified by column chromatography. Benzyl 4-nitrobenzoate was isolated as an off-white solid (197 mg, 0.77 mmol, 77%).

- Aldrich and Taniguchi also proposed a fully catalytic procedure where they combined their phosphine recycling with azodicarboxylate recycling.<sup>17, 18</sup>

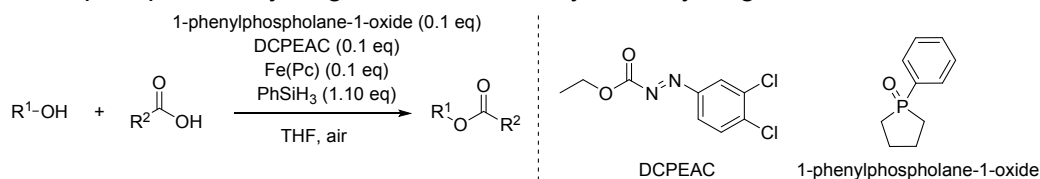

- **Representative experimental procedure:** To a 35 mL pressure tube equipped with a stir bar was added 1-phenylphospholane-1-oxide (9.0 mg, 0.10 equiv, 0.05 mmol), DCPEAC (12.5 mg, 0.10 equiv, 0.05 mmol), Fe(Pc) (28.5 mg, 0.10 equiv, 0.05 mmol), 4-nitrobenzoic acid (125 mg, 1.5 equiv, 0.75 mmol), and 5 Å powdered molecular sieves (500 mg). THF (3 mL) was added followed by 4-methoxybenzyl alcohol (62 mL, 1.0 equiv, 0.50 mmol), and phenylsilane (68 mL, 1.1 equiv, 0.55 mmol). The vessel was purged with oxygen gas and sealed. The reaction was heated at 70 °C for 48 h. The reaction was cooled, filtered to remove the sieves and the filtrate was partitioned between EtOAc (30 mL) and saturated aqueous NaHCO<sub>3</sub> (30 mL). The organic layer was separated and washed with saturated aqueous NaCl (30 mL), dried (MgSO<sub>4</sub>) and concentrated under reduced pressure. The residue was purified by column chromatography. 4-Methoxybenzyl 4-nitrobenzoate was isolated as a yellow solid (90.5 mg, 0.32 mmol, 63%).

We applied the following simulations in the following sections:

- Simulation 1:
  - The acid is the limiting reactant and is present in a 0.4 M solution.
  - A yield of 90% for the ester is assumed.
- Simulation 2:
  - The acid is the limiting reactant and is present in a 0.4 M solution.
  - A yield of 80% for the ester is assumed.
- Simulation 3:
  - The acid is the limiting reactant and is present in a 0.4 M solution.
  - A yield of 70% for the ester is assumed.
- Simulation 4:
  - The acid is the limiting reactant and is present in a 0.4 M solution.
  - A yield of 50% for the ester is assumed.
- Simulation 5:
  - The acid is the limiting reactant and is present in a 0.4 M solution.
  - A yield of 90% for the ester is assumed.
  - The scale of the reaction is multiplied by 5 compared to simulation A.
- Simulation 6:
  - The acid is the limiting reactant and is present in a 0.8 M solution.
  - A yield of 90% for the ester is assumed.



## 3.5.1 Catalytic in the azo coupling reagent with di(acetoxy)iodobenzene as oxidant

**Table S12.** Green metrics simulations applied on the Mitsunobu reaction catalytic in azo reagent with iodosobenzene diacetate.

| <div> </div>                                                 |                                            |                                            |                                            |                                            |                                          |           |
|--------------------------------------------------------------|--------------------------------------------|--------------------------------------------|--------------------------------------------|--------------------------------------------|------------------------------------------|-----------|
| <br><b>A</b><br>122.12 g mol <sup>-1</sup>                   | <br><b>B</b><br>156.57 g mol <sup>-1</sup> | <br><b>C</b><br>212.12 g mol <sup>-1</sup> | <br><b>D</b><br>310.77 g mol <sup>-1</sup> | <br><b>E</b><br>440.50 g mol <sup>-1</sup> |                                          |           |
| Carboxylic acid                                              | AE (%)                                     | RME (%)                                    | PMI (g g <sup>-1</sup> )                   | PMI <sub>RRC</sub> (g g <sup>-1</sup> )    | PMI <sub>solv</sub> (g g <sup>-1</sup> ) | Yield (%) |
| Simulation 1: [Acid] = 0.4 M, Yield = 90%                    |                                            |                                            |                                            |                                            |                                          |           |
| A                                                            | 92                                         | 76                                         | 18.1                                       | 6.5                                        | 11.6                                     | 90        |
| B                                                            | 93                                         | 78                                         | 15.7                                       | 5.7                                        | 10.0                                     | 90        |
| C                                                            | 94                                         | 80                                         | 13.1                                       | 4.9                                        | 8.2                                      | 90        |
| D                                                            | 96                                         | 82                                         | 10.1                                       | 4.0                                        | 6.2                                      | 90        |
| E                                                            | 97                                         | 84                                         | 7.9                                        | 3.3                                        | 4.7                                      | 90        |
| Simulation 2: [Acid] = 0.4 M, Yield = 80%                    |                                            |                                            |                                            |                                            |                                          |           |
| A                                                            | 92                                         | 67                                         | 20.4                                       | 7.3                                        | 13.1                                     | 80        |
| B                                                            | 93                                         | 69                                         | 17.7                                       | 6.4                                        | 11.3                                     | 80        |
| C                                                            | 94                                         | 71                                         | 14.7                                       | 5.5                                        | 9.2                                      | 80        |
| D                                                            | 96                                         | 73                                         | 11.4                                       | 4.4                                        | 6.9                                      | 80        |
| E                                                            | 97                                         | 74                                         | 8.9                                        | 3.7                                        | 5.2                                      | 80        |
| Simulation 3: [Acid] = 0.4 M, Yield = 70%                    |                                            |                                            |                                            |                                            |                                          |           |
| A                                                            | 92                                         | 59                                         | 23.3                                       | 8.3                                        | 15.0                                     | 70        |
| B                                                            | 93                                         | 60                                         | 20.2                                       | 7.4                                        | 12.9                                     | 70        |
| C                                                            | 94                                         | 62                                         | 16.8                                       | 6.3                                        | 10.5                                     | 70        |
| D                                                            | 96                                         | 64                                         | 13.0                                       | 5.1                                        | 7.9                                      | 70        |
| E                                                            | 97                                         | 65                                         | 10.2                                       | 4.2                                        | 6.0                                      | 70        |
| Simulation 4: [Acid] = 0.4 M, Yield = 50%                    |                                            |                                            |                                            |                                            |                                          |           |
| A                                                            | 92                                         | 42                                         | 32.6                                       | 11.7                                       | 20.9                                     | 50        |
| B                                                            | 93                                         | 43                                         | 28.3                                       | 10.3                                       | 18.0                                     | 50        |
| C                                                            | 94                                         | 44                                         | 23.5                                       | 8.8                                        | 14.7                                     | 50        |
| D                                                            | 96                                         | 46                                         | 18.2                                       | 7.1                                        | 11.7                                     | 50        |
| E                                                            | 97                                         | 47                                         | 14.2                                       | 5.9                                        | 8.4                                      | 50        |
| Simulation 5: Scale reaction x5, [Acid] = 0.4 M, Yield = 90% |                                            |                                            |                                            |                                            |                                          |           |
| A                                                            | 92                                         | 76                                         | 18.1                                       | 6.5                                        | 11.6                                     | 90        |
| B                                                            | 93                                         | 78                                         | 15.7                                       | 5.7                                        | 10.0                                     | 90        |
| C                                                            | 94                                         | 80                                         | 13.1                                       | 4.9                                        | 8.2                                      | 90        |
| D                                                            | 96                                         | 82                                         | 10.1                                       | 4.0                                        | 6.2                                      | 90        |
| E                                                            | 97                                         | 84                                         | 7.9                                        | 3.3                                        | 4.7                                      | 90        |
| Simulation 6: [Acid] = 0.8 M, Yield = 90%                    |                                            |                                            |                                            |                                            |                                          |           |
| A                                                            | 92                                         | 76                                         | 12.3                                       | 6.5                                        | 5.8                                      | 90        |
| B                                                            | 93                                         | 78                                         | 10.7                                       | 5.7                                        | 5.0                                      | 90        |
| C                                                            | 94                                         | 80                                         | 9.0                                        | 4.9                                        | 4.1                                      | 90        |
| D                                                            | 96                                         | 82                                         | 7.0                                        | 4.0                                        | 3.1                                      | 90        |
| E                                                            | 97                                         | 84                                         | 5.6                                        | 3.3                                        | 2.3                                      | 90        |

### 3.5.2 Catalytic in the azo coupling reagent with iron phthalocyanine and oxygen for reoxidation

**Table S13.** Green metrics simulations applied on the Mitsunobu reaction catalytic in azo reagent with phthalocyanine and O<sub>2</sub>.

| <br>A<br>122.12 g mol <sup>-1</sup>                          | <br>B<br>156.57 g mol <sup>-1</sup> | <br>C<br>212.12 g mol <sup>-1</sup> | <br>D<br>310.77 g mol <sup>-1</sup> | <br>E<br>440.50 g mol <sup>-1</sup>     |                                          |           |
|--------------------------------------------------------------|-------------------------------------|-------------------------------------|-------------------------------------|-----------------------------------------|------------------------------------------|-----------|
| Carboxylic acid                                              | AE (%)                              | RME (%)                             | PMI (g g <sup>-1</sup> )            | PMI <sub>RRC</sub> (g g <sup>-1</sup> ) | PMI <sub>solv</sub> (g g <sup>-1</sup> ) | Yield (%) |
| Simulation 1: [Acid] = 0.4 M, Yield = 90%                    |                                     |                                     |                                     |                                         |                                          |           |
| A                                                            | 92                                  | 76                                  | 15.0                                | 3.4                                     | 11.6                                     | 90        |
| B                                                            | 93                                  | 78                                  | 13.1                                | 3.1                                     | 10.0                                     | 90        |
| C                                                            | 94                                  | 80                                  | 10.9                                | 2.7                                     | 8.2                                      | 90        |
| D                                                            | 96                                  | 82                                  | 8.5                                 | 2.3                                     | 6.2                                      | 90        |
| E                                                            | 97                                  | 84                                  | 6.7                                 | 2.0                                     | 4.7                                      | 90        |
| Simulation 2: [Acid] = 0.4 M, Yield = 80%                    |                                     |                                     |                                     |                                         |                                          |           |
| A                                                            | 92                                  | 67                                  | 16.9                                | 3.8                                     | 13.1                                     | 80        |
| B                                                            | 93                                  | 69                                  | 14.7                                | 3.5                                     | 11.3                                     | 80        |
| C                                                            | 94                                  | 71                                  | 12.2                                | 3.1                                     | 9.2                                      | 80        |
| D                                                            | 96                                  | 73                                  | 9.5                                 | 2.6                                     | 6.9                                      | 80        |
| E                                                            | 97                                  | 74                                  | 7.5                                 | 2.3                                     | 5.2                                      | 80        |
| Simulation 3: [Acid] = 0.4 M, Yield = 70%                    |                                     |                                     |                                     |                                         |                                          |           |
| A                                                            | 92                                  | 59                                  | 19.3                                | 4.4                                     | 15.0                                     | 70        |
| B                                                            | 93                                  | 60                                  | 16.8                                | 4.0                                     | 12.9                                     | 70        |
| C                                                            | 94                                  | 62                                  | 14.0                                | 3.5                                     | 10.5                                     | 70        |
| D                                                            | 96                                  | 64                                  | 10.9                                | 3.0                                     | 7.9                                      | 70        |
| E                                                            | 97                                  | 65                                  | 8.6                                 | 2.6                                     | 6.0                                      | 70        |
| Simulation 4: [Acid] = 0.4 M, Yield = 50%                    |                                     |                                     |                                     |                                         |                                          |           |
| A                                                            | 92                                  | 42                                  | 27.1                                | 6.1                                     | 20.9                                     | 50        |
| B                                                            | 93                                  | 43                                  | 23.6                                | 5.5                                     | 18.0                                     | 50        |
| C                                                            | 94                                  | 44                                  | 21.0                                | 6.3                                     | 14.7                                     | 50        |
| D                                                            | 96                                  | 46                                  | 15.3                                | 4.2                                     | 11.1                                     | 50        |
| E                                                            | 97                                  | 47                                  | 12.0                                | 3.6                                     | 8.4                                      | 50        |
| Simulation 5: Scale reaction x5, [Acid] = 0.4 M, Yield = 90% |                                     |                                     |                                     |                                         |                                          |           |
| A                                                            | 92                                  | 76                                  | 15.0                                | 3.4                                     | 11.6                                     | 90        |
| B                                                            | 93                                  | 78                                  | 13.1                                | 3.1                                     | 10.0                                     | 90        |
| C                                                            | 94                                  | 80                                  | 10.9                                | 2.7                                     | 8.2                                      | 90        |
| D                                                            | 96                                  | 82                                  | 8.5                                 | 2.3                                     | 6.2                                      | 90        |
| E                                                            | 97                                  | 84                                  | 6.7                                 | 2.0                                     | 4.7                                      | 90        |
| Simulation 6: [Acid] = 0.8 M, Yield = 90%                    |                                     |                                     |                                     |                                         |                                          |           |
| A                                                            | 92                                  | 76                                  | 9.2                                 | 3.4                                     | 5.8                                      | 90        |
| B                                                            | 93                                  | 78                                  | 8.1                                 | 3.1                                     | 5.0                                      | 90        |
| C                                                            | 94                                  | 80                                  | 6.8                                 | 2.7                                     | 4.1                                      | 90        |
| D                                                            | 96                                  | 82                                  | 5.4                                 | 2.3                                     | 3.1                                      | 90        |
| E                                                            | 97                                  | 84                                  | 4.4                                 | 2.0                                     | 2.3                                      | 90        |

## 3.5.3 Catalytic in phosphine

**Table S14.** Green metrics simulations applied on the Mitsunobu reaction catalytic in phosphine.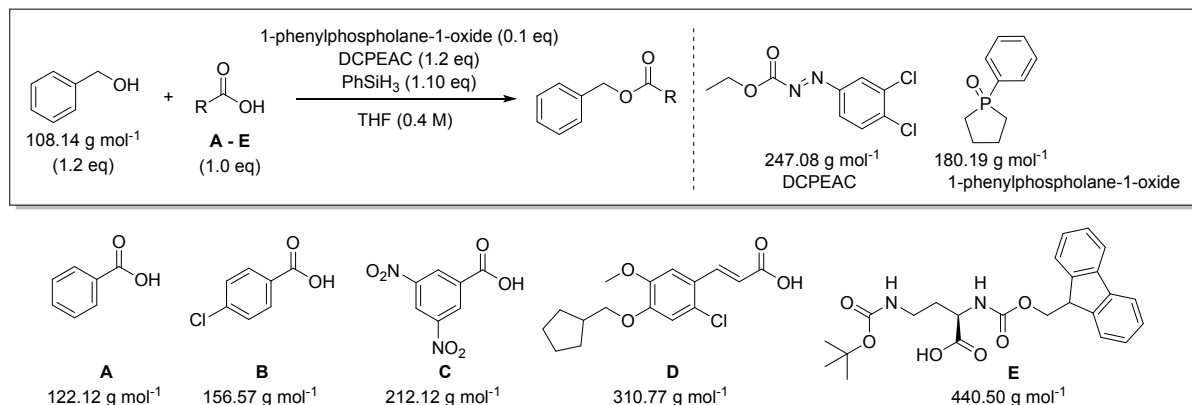

| Carboxylic acid                                              | AE (%) | RME (%) | PMI (g g <sup>-1</sup> ) | PMI <sub>RRC</sub> (g g <sup>-1</sup> ) | PMI <sub>solv</sub> (g g <sup>-1</sup> ) | Yield (%) |
|--------------------------------------------------------------|--------|---------|--------------------------|-----------------------------------------|------------------------------------------|-----------|
| Simulation 1: [Acid] = 0.4 M, Yield = 90%                    |        |         |                          |                                         |                                          |           |
| A                                                            | 92     | 76      | 15.2                     | 3.6                                     | 11.6                                     | 90        |
| B                                                            | 93     | 78      | 13.3                     | 3.3                                     | 10.0                                     | 90        |
| C                                                            | 94     | 80      | 11.0                     | 2.9                                     | 8.2                                      | 90        |
| D                                                            | 96     | 82      | 8.6                      | 2.4                                     | 6.2                                      | 90        |
| E                                                            | 97     | 84      | 6.8                      | 2.1                                     | 4.7                                      | 90        |
| Simulation 2: [Acid] = 0.4 M, Yield = 80%                    |        |         |                          |                                         |                                          |           |
| A                                                            | 92     | 67      | 10.6                     | 4.1                                     | 6.5                                      | 80        |
| B                                                            | 93     | 69      | 9.3                      | 3.7                                     | 5.6                                      | 80        |
| C                                                            | 94     | 71      | 7.8                      | 3.2                                     | 4.6                                      | 80        |
| D                                                            | 96     | 73      | 6.2                      | 2.7                                     | 3.5                                      | 80        |
| E                                                            | 97     | 74      | 5.0                      | 2.4                                     | 2.6                                      | 80        |
| Simulation 3: [Acid] = 0.4 M, Yield = 70%                    |        |         |                          |                                         |                                          |           |
| A                                                            | 92     | 59      | 19.6                     | 4.6                                     | 15.0                                     | 70        |
| B                                                            | 93     | 60      | 17.1                     | 4.2                                     | 12.9                                     | 70        |
| C                                                            | 94     | 62      | 14.2                     | 3.7                                     | 10.5                                     | 70        |
| D                                                            | 96     | 64      | 11.0                     | 3.1                                     | 7.9                                      | 70        |
| E                                                            | 97     | 65      | 8.7                      | 2.7                                     | 6.0                                      | 70        |
| Simulation 4: [Acid] = 0.4 M, Yield = 50%                    |        |         |                          |                                         |                                          |           |
| A                                                            | 92     | 42      | 27.4                     | 6.5                                     | 20.9                                     | 50        |
| B                                                            | 93     | 43      | 23.9                     | 5.9                                     | 18.0                                     | 50        |
| C                                                            | 94     | 44      | 19.9                     | 5.1                                     | 14.7                                     | 50        |
| D                                                            | 96     | 46      | 15.5                     | 4.4                                     | 11.1                                     | 50        |
| E                                                            | 97     | 47      | 12.2                     | 3.8                                     | 8.4                                      | 50        |
| Simulation 5: Scale reaction x5, [Acid] = 0.4 M, Yield = 90% |        |         |                          |                                         |                                          |           |
| A                                                            | 92     | 76      | 15.2                     | 3.6                                     | 11.6                                     | 90        |
| B                                                            | 93     | 78      | 13.3                     | 3.3                                     | 10.0                                     | 90        |
| C                                                            | 94     | 80      | 11.0                     | 2.9                                     | 8.2                                      | 90        |
| D                                                            | 96     | 82      | 8.6                      | 2.4                                     | 6.2                                      | 90        |
| E                                                            | 97     | 84      | 6.8                      | 2.1                                     | 4.7                                      | 90        |
| Simulation 6: [Acid] = 0.8 M, Yield = 90%                    |        |         |                          |                                         |                                          |           |
| A                                                            | 92     | 76      | 9.4                      | 3.6                                     | 5.8                                      | 90        |
| B                                                            | 93     | 78      | 8.3                      | 3.3                                     | 5.0                                      | 90        |
| C                                                            | 94     | 80      | 6.9                      | 2.9                                     | 4.1                                      | 90        |
| D                                                            | 96     | 82      | 5.5                      | 2.4                                     | 3.1                                      | 90        |
| E                                                            | 97     | 84      | 4.4                      | 2.1                                     | 2.3                                      | 90        |

## 3.5.4 “Fully catalytic” Mitsunobu reaction

**Table S15.** Green metrics simulations applied on the “fully catalytic” Mitsunobu reaction.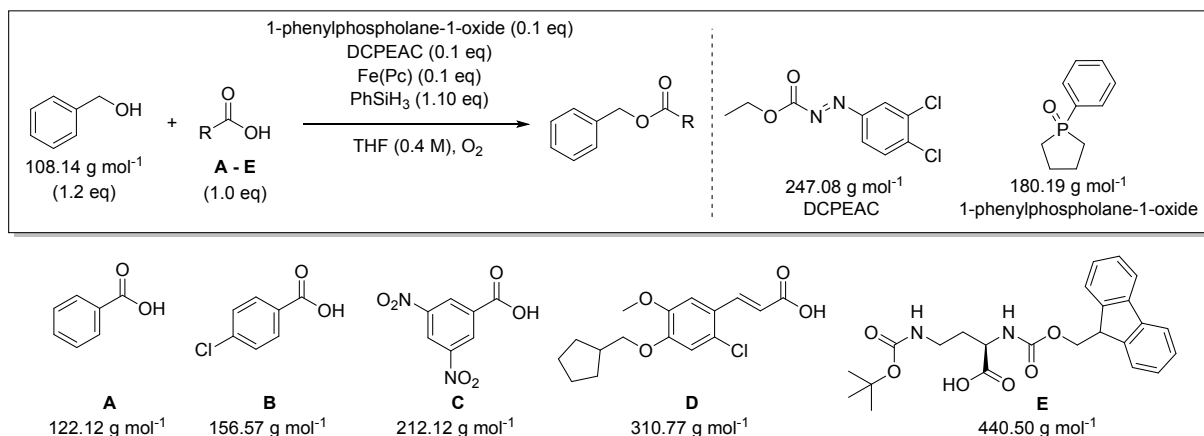

| Carboxylic acid                                              | AE (%) | RME (%) | PMI (g g <sup>-1</sup> ) | PMI <sub>RRC</sub> (g g <sup>-1</sup> ) | PMI <sub>solv</sub> (g g <sup>-1</sup> ) | Yield (%) |
|--------------------------------------------------------------|--------|---------|--------------------------|-----------------------------------------|------------------------------------------|-----------|
| Simulation 1: [Acid] = 0.4 M, Yield = 90%                    |        |         |                          |                                         |                                          |           |
| A                                                            | 92     | 76      | 14.1                     | 2.5                                     | 11.6                                     | 90        |
| B                                                            | 93     | 78      | 12.3                     | 2.3                                     | 10.0                                     | 90        |
| C                                                            | 94     | 80      | 10.2                     | 2.1                                     | 8.2                                      | 90        |
| D                                                            | 96     | 82      | 8.0                      | 1.8                                     | 6.2                                      | 90        |
| E                                                            | 97     | 84      | 6.3                      | 1.7                                     | 4.7                                      | 90        |
| Simulation 2: [Acid] = 0.4 M, Yield = 80%                    |        |         |                          |                                         |                                          |           |
| A                                                            | 92     | 67      | 15.9                     | 2.8                                     | 13.1                                     | 80        |
| B                                                            | 93     | 69      | 13.8                     | 2.6                                     | 11.3                                     | 80        |
| C                                                            | 94     | 71      | 11.5                     | 2.3                                     | 9.2                                      | 80        |
| D                                                            | 96     | 73      | 9.0                      | 2.1                                     | 6.9                                      | 80        |
| E                                                            | 97     | 74      | 7.1                      | 1.9                                     | 5.2                                      | 80        |
| Simulation 3: [Acid] = 0.4 M, Yield = 70%                    |        |         |                          |                                         |                                          |           |
| A                                                            | 92     | 59      | 18.1                     | 3.2                                     | 15.0                                     | 70        |
| B                                                            | 93     | 60      | 15.8                     | 2.9                                     | 12.9                                     | 70        |
| C                                                            | 94     | 62      | 13.2                     | 2.7                                     | 10.5                                     | 70        |
| D                                                            | 96     | 64      | 10.3                     | 2.3                                     | 7.9                                      | 70        |
| E                                                            | 97     | 65      | 8.1                      | 2.1                                     | 6.0                                      | 70        |
| Simulation 4: [Acid] = 0.4 M, Yield = 50%                    |        |         |                          |                                         |                                          |           |
| A                                                            | 92     | 42      | 25.4                     | 4.4                                     | 20.9                                     | 50        |
| B                                                            | 93     | 43      | 22.1                     | 4.1                                     | 18.0                                     | 50        |
| C                                                            | 94     | 44      | 18.4                     | 3.7                                     | 14.7                                     | 50        |
| D                                                            | 96     | 46      | 14.4                     | 3.3                                     | 11.1                                     | 50        |
| E                                                            | 97     | 47      | 11.4                     | 3.0                                     | 8.4                                      | 50        |
| Simulation 5: Scale reaction x5, [Acid] = 0.4 M, Yield = 90% |        |         |                          |                                         |                                          |           |
| A                                                            | 92     | 76      | 14.1                     | 2.5                                     | 11.6                                     | 90        |
| B                                                            | 93     | 78      | 12.3                     | 2.3                                     | 10.0                                     | 90        |
| C                                                            | 94     | 80      | 10.2                     | 2.1                                     | 8.2                                      | 90        |
| D                                                            | 96     | 82      | 8.0                      | 1.8                                     | 6.2                                      | 90        |
| E                                                            | 97     | 84      | 6.3                      | 1.7                                     | 4.7                                      | 90        |
| Simulation 6: [Acid] = 0.8 M, Yield = 90%                    |        |         |                          |                                         |                                          |           |
| A                                                            | 92     | 76      | 8.3                      | 2.5                                     | 5.8                                      | 90        |
| B                                                            | 93     | 78      | 7.3                      | 2.3                                     | 5.0                                      | 90        |
| C                                                            | 94     | 80      | 6.1                      | 2.1                                     | 4.1                                      | 90        |
| D                                                            | 96     | 82      | 4.9                      | 1.8                                     | 3.1                                      | 90        |
| E                                                            | 97     | 84      | 4.0                      | 1.7                                     | 2.3                                      | 90        |

## 4 References

1. W.-C. Chou, C.-W. Tan, S.-F. Chen and H. Ku, *J. Org. Chem.*, 1998, **63**, 10015-10017.
2. S. García-Rubio, C. D. Wilson, D. A. Renner, J. O. Rosser, D. Patra, J. G. Reid and S. H. Pines, *Org. Process Res. Dev.*, 2004, **8**, 360-362.
3. N. A. Magnus, T. M. Braden, J. Y. Buser, A. C. DeBaillie, P. C. Heath, C. P. Ley, J. R. Remacle, D. L. Varie and T. M. Wilson, *Org. Process Res. Dev.*, 2012, **16**, 830-835.
4. K. Neelakandan, H. Manikandan, N. Santosha and B. Prabhakaran, *Org. Process Res. Dev.*, 2013, **17**, 981-984.
5. G. A. Weisenburger, D. K. Anderson, J. D. Clark, A. D. Edney, P. S. Karbin, D. J. Gallagher, C. M. Knable and M. A. Pietz, *Org. Process Res. Dev.*, 2009, **13**, 60-63.
6. M. Prashad, K. Prasad, O. Repic, T. J. Blacklock and W. Prikozovich, *Org. Process Res. Dev.*, 1999, **3**, 409-415.
7. L. Storace, L. Anzalone, P. N. Confalone, W. P. Davis, J. M. Fortunak, M. Giangiordano, J. J. Haley, K. Kamholz, H.-Y. Li, P. Ma, W. A. Nugent, R. L. Parsons, P. J. Sheeran, C. E. Silverman, R. E. Waltermire and C. C. Wood, *Org. Process Res. Dev.*, 2002, **6**, 54-63.
8. Y. J. Pu, R. K. Vaid, S. K. Boini, R. W. Towsley, C. W. Doecke and D. Mitchell, *Org. Process Res. Dev.*, 2009, **13**, 310-314.
9. T. Ito, T. Ikemoto, Y. Isogami, H. Wada, M. Sera, Y. Mizuno and M. Wakimasu, *Org. Process Res. Dev.*, 2002, **6**, 238-241.
10. B.-F. Li, R. M. Hughes, J. Le, K. McGee, D. J. Gallagher, R. S. Gross, D. Provencal, J. P. Reddy, P. Wang, L. Zegelman, Y. Zhao and S. E. Zook, *Org. Process Res. Dev.*, 2009, **13**, 463-467.
11. A. Alimardanov, A. Nikitenko, T. J. Connolly, G. Feigelson, A. W. Chan, Z. Ding, M. Ghosh, X. Shi, J. Ren, E. Hansen, R. Farr, M. MacEwan, S. Tadayon, D. M. Springer, A. F. Kreft, D. M. Ho and J. R. Potoski, *Org. Process Res. Dev.*, 2009, **13**, 1161-1168.
12. C. A. Busacca, X. Wei, N. Haddad, S. Kapadia, J. C. Lorenz, A. K. Saha, R. J. Varsolona, T. Berkenbusch, S. C. Campbell, V. Farina, X. Feng, N. C. Gonnella, N. Grinberg, P.-J. Jones, H. Lee, Z. Li, O. Niemeier, W. Samstag, M. Sarvestani, J. Schroeder, J. Smoliga, E. M. Spinelli, J. Vitous and C. H. Senanayake, *Asian J. Org. Chem.*, 2012, **1**, 80-89.
13. J. R. Dunetz, M. A. Berliner, Y. Xiang, T. L. Houck, F. H. Salingue, W. Chao, C. Yuandong, W. Shenghua, Y. Huang, D. Farrand, S. J. Boucher, D. B. Damon, T. W. Makowski, M. T. Barrila, R. Chen and I. Martínez, *Org. Process Res. Dev.*, 2012, **16**, 1635-1645.
14. T. Y. S. But and P. H. Toy, *J. Am. Chem. Soc.*, 2006, **128**, 9636-9637.
15. T. Y. S. But, J. Lu and P. H. Toy, *Synlett*, 2010, 1115-1117.
16. D. Hirose, T. Taniguchi and H. Ishibashi, *Angew. Chem. Int. Ed.*, 2013, **52**, 4613-4617.
17. J. A. Buonomo and C. C. Aldrich, *Angew. Chem. Int. Ed.*, 2015, **54**, 13041-13044.
18. D. Hirose, M. Gazvoda, J. Košmrlj and T. Taniguchi, *Org. Lett.*, 2016, **18**, 4036-4039.
